# Supplementary material for: Palaeogenomics of Upper Palaeolithic to Neolithic European hunter-gatherers
Source: Springer Nature journal article supplement (doi:10.1038/s41586-023-05726-0), 2023-03-01
Supplement: MOESM4 [file 41586_2023_5726_MOESM4_ESM.xlsx]

## Sheet: A.Outgroup-f3
	AAT	AC16	ACR.pmd	AMI	AMI001	Anatolia_Pinarbasi	Austria_KremsWA3	BachoKiro_IUP	BER	BerryAuBac	BK-1653	Bockstein	Brillenhohle.pmd	BRM	Burkhardtshohle.pmd	Chaudardes1.pmd	CIO	Croatia_VelaSpila	CRN	CRW	Czech_Pavlov1	Czech_Vestonice	Denmark_Syltholm	DOB	DOG	DON005	DRI	England_AvelinesHole.SG	England_GoughsCave.SG	England_KentsCavern.SG	Estonia_CCC	Estonia_CCC.SG	Estonia_Narva	Falkenstein	FRL	FRM	Germany_BadDurrenberg	Germany_Blatterhohle	Germany_Bottendorf	GER_new	GFW_1	GFW_2	GOY	GoyetQ116-1	GoyetQ2	GoyetQ376-3	HohleFels	Hungary_Koros	Iboussieres
AAT	NA	0.37867	0.351742	0.352379	0.346898	0.268046	0.279453	0.21924	0.295999	0.398747	0.265068	0.318798	0.299189	0.304204	0.294317	0.370207	0.275826	0.35427	0.341833	0.355961	0.285538	0.275244	0.363328	0.367189	0.369821	0.3056	0.356102	0.357992	0.375027	0.363288	0.303866	0.292028	0.322851	0.366493	0.273102	0.375067	0.365912	0.340625	0.359406	0.280108	0.358351	0.359182	0.28057	0.271644	0.300164	0.262286	0.295934	0.34411	0.347963
AC16	0.37867	NA	0.364902	0.359325	0.357369	0.267375	0.285718	0.220308	0.298326	0.407496	0.272654	0.327274	0.282377	0.310624	0.289927	0.375165	0.277148	0.372663	0.351994	0.358297	0.291884	0.282086	0.369015	0.374203	0.372797	0.315796	0.359533	0.365496	0.379831	0.37432	0.310231	0.293286	0.326392	0.37626	0.273199	0.385333	0.374047	0.344792	0.357978	0.277667	0.366835	0.366554	0.285755	0.264757	0.296338	0.265657	0.294643	0.349836	0.380883
ACR.pmd	0.351742	0.364902	NA	0.350936	0.339397	0.263506	0.296689	0.215112	0.299957	0.316398	0.259896	0.318327	0.310657	0.303603	0.47286	0.477808	0.399396	0.318605	0.336889	0.351995	0.271036	0.269848	0.331789	0.353085	0.35354	0.476829	0.360975	0.334406	0.376139	0.362462	0.288676	0.292017	0.311916	0.310293	0.269105	0.373814	0.356109	0.334326	0.363795	0.265899	0.347065	0.353764	0.301024	0.2646	0.296519	0.268856	0.306416	0.336208	0.337055
AMI	0.352379	0.359325	0.350936	NA	0.374824	0.267243	0.282855	0.221212	0.300181	0.388627	0.267183	0.300494	0.304269	0.301476	0.307755	0.360571	0.29996	0.346812	0.336691	0.342566	0.275891	0.278785	0.348897	0.35023	0.352098	0.297567	0.340991	0.341931	0.352276	0.352924	0.305172	0.296765	0.319371	0.354057	0.283034	0.357127	0.350777	0.336297	0.33657	0.286637	0.34814	0.342759	0.283381	0.279158	0.305165	0.257109	0.312798	0.340802	0.331907
AMI001	0.346898	0.357369	0.339397	0.374824	NA	0.265274	0.280646	0.21951	0.29348	0.358008	0.267427	0.307772	0.302296	0.299252	0.307594	0.341258	0.267501	0.342347	0.336389	0.337543	0.286072	0.274472	0.341744	0.344164	0.342284	0.303614	0.337998	0.340551	0.348964	0.339916	0.308241	0.297874	0.316113	0.341034	0.275204	0.35485	0.347781	0.327343	0.340453	0.282143	0.341409	0.340339	0.284053	0.271267	0.299678	0.267134	0.299022	0.332528	0.332429
Anatolia_Pinarbasi	0.268046	0.267375	0.263506	0.267243	0.265274	NA	0.254328	0.214679	0.262336	0.298917	0.249786	0.24964	0.269767	0.278057	0.270325	0.273448	0.26692	0.273961	0.2623	0.269953	0.252642	0.253649	0.271212	0.264542	0.265685	0.264259	0.26567	0.262762	0.268579	0.260703	0.264081	0.256162	0.265586	0.263332	0.247829	0.267496	0.26922	0.275312	0.268136	0.253043	0.267541	0.268568	0.254639	0.247099	0.256826	0.256016	0.256448	0.272251	0.25474
Austria_KremsWA3	0.279453	0.285718	0.296689	0.282855	0.280646	0.254328	NA	0.221128	0.249149	0.270934	0.285183	0.247405	0.272299	0.26363	0.285193	0.281023	0.289431	0.283799	0.283847	0.277102	0.332256	0.346511	0.271466	0.277335	0.284603	0.238588	0.27643	0.274545	0.285257	0.287606	0.269144	0.271185	0.272422	0.28361	0.28029	0.285782	0.284488	0.280462	0.276499	0.284568	0.279696	0.282422	0.283702	0.274166	0.276131	0.245077	0.28801	0.282066	0.265975
BachoKiro_IUP	0.21924	0.220308	0.215112	0.221212	0.21951	0.214679	0.221128	NA	0.216326	0.237939	0.22223	0.202471	0.212867	0.21988	0.225721	0.217904	0.225107	0.221209	0.223843	0.220031	0.22921	0.2226	0.219452	0.218604	0.219196	0.227164	0.218485	0.218201	0.218837	0.211658	0.222715	0.217284	0.220563	0.220095	0.230907	0.221589	0.216801	0.219668	0.213313	0.230436	0.219801	0.218823	0.225074	0.227956	0.221371	0.218177	0.224167	0.220797	0.214271
BER	0.295999	0.298326	0.299957	0.300181	0.29348	0.262336	0.249149	0.216326	NA	0.261651	0.249505	0.284195	0.279085	0.292096	0.233455	0.280237	0.255338	0.291986	0.280494	0.301077	0.243498	0.254369	0.313984	0.304651	0.298132	0.335872	0.300877	0.29083	0.301658	0.281263	0.306725	0.337753	0.298572	0.285769	0.253135	0.283461	0.294307	0.296778	0.292652	0.276404	0.300295	0.303142	0.261762	0.249982	0.262616	0.246049	0.257784	0.302061	0.291754
BerryAuBac	0.398747	0.407496	0.316398	0.388627	0.358008	0.298917	0.270934	0.237939	0.261651	NA	0.276007	0.36168	0.338365	0.324067	0.363095	0.386223	0.289793	0.375539	0.347727	0.377159	0.353048	0.291521	0.373443	0.396768	0.399473	0.475257	0.382071	0.376189	0.407938	0.330155	0.316904	0.274449	0.352662	0.393784	0.294993	0.420651	0.404395	0.36011	0.354478	0.287903	0.380869	0.37224	0.290143	0.287187	0.333347	0.306459	0.33335	0.369803	0.384807
BK-1653	0.265068	0.272654	0.259896	0.267183	0.267427	0.249786	0.285183	0.22223	0.249505	0.276007	NA	0.246631	0.276552	0.257863	0.274568	0.268238	0.289405	0.273264	0.273176	0.267947	0.288359	0.282433	0.267812	0.268488	0.268203	0.259657	0.265707	0.263005	0.271323	0.259813	0.258602	0.252444	0.262397	0.262917	0.278009	0.267817	0.268701	0.26426	0.258863	0.276708	0.267888	0.266948	0.280756	0.275565	0.2735	0.247564	0.270538	0.266052	0.264687
Bockstein	0.318798	0.327274	0.318327	0.300494	0.307772	0.24964	0.247405	0.202471	0.284195	0.36168	0.246631	NA	0.331924	0.288557	0.225373	0.310733	0.270253	0.324244	0.297784	0.325688	0.286045	0.25158	0.336494	0.333525	0.325452	0.25438	0.313085	0.334273	0.324401	0.302206	0.278383	0.282422	0.296285	0.320158	0.247433	0.329595	0.330082	0.316724	0.324235	0.264425	0.33021	0.328793	0.263979	0.235765	0.268423	0.243829	0.271351	0.316965	0.320268
Brillenhohle.pmd	0.299189	0.282377	0.310657	0.304269	0.302296	0.269767	0.272299	0.212867	0.279085	0.338365	0.276552	0.331924	NA	0.299118	0.42864	0.299027	0.211002	0.273935	0.341401	0.289163	0.287086	0.277438	0.296424	0.292986	0.300377	0.355263	0.286011	0.344538	0.297541	0.28242	0.278729	0.264838	0.262105	0.283234	0.336403	0.298957	0.29126	0.291432	0.224085	0.35416	0.297983	0.290609	0.301063	0.300899	0.415917	0.257851	0.42588	0.294852	0.326362
BRM	0.304204	0.310624	0.303603	0.301476	0.299252	0.278057	0.26363	0.21988	0.292096	0.324067	0.257863	0.288557	0.299118	NA	0.261671	0.294068	0.282068	0.298807	0.294381	0.298729	0.259562	0.264829	0.301989	0.308048	0.303494	0.28458	0.297774	0.313317	0.302733	0.304156	0.288148	0.273904	0.289969	0.280668	0.262531	0.316218	0.300478	0.303371	0.2959	0.2667	0.298503	0.305225	0.274844	0.255847	0.26941	0.248577	0.285815	0.297474	0.310095
Burkhardtshohle.pmd	0.294317	0.289927	0.47286	0.307755	0.307594	0.270325	0.285193	0.225721	0.233455	0.363095	0.274568	0.225373	0.42864	0.261671	NA	0.275761	0.2591	0.305391	0.32989	0.29273	0.262543	0.279327	0.291593	0.302045	0.292742	0.346653	0.29358	0.307045	0.290445	0.311295	0.259194	0.287868	0.256355	0.298512	0.332866	0.260354	0.295898	0.282566	0.247196	0.332755	0.291949	0.287818	0.318443	0.302958	0.411841	0.176097	0.39804	0.295843	0.289745
Chaudardes1.pmd	0.370207	0.375165	0.477808	0.360571	0.341258	0.273448	0.281023	0.217904	0.280237	0.386223	0.268238	0.310733	0.299027	0.294068	0.275761	NA	0.239241	0.344771	0.344352	0.352654	0.247613	0.274877	0.35371	0.367481	0.37688	0.183615	0.345218	0.387873	0.372554	0.360165	0.306606	0.275681	0.330343	0.37634	0.280689	0.362519	0.369397	0.333596	0.338591	0.29775	0.350406	0.357284	0.280916	0.267637	0.309496	0.261239	0.314688	0.341329	0.35619
CIO	0.275826	0.277148	0.399396	0.29996	0.267501	0.26692	0.289431	0.225107	0.255338	0.289793	0.289405	0.270253	0.211002	0.282068	0.2591	0.239241	NA	0.27375	0.278042	0.266162	0.272791	0.272225	0.273666	0.278562	0.268806	0.497804	0.286221	0.280909	0.276148	0.246522	0.268386	0.2555	0.26987	0.245456	0.284613	0.282171	0.247208	0.266499	0.273101	0.312149	0.278583	0.273958	0.27941	0.272342	0.27291	0.239246	0.291091	0.267918	0.247075
Croatia_VelaSpila	0.35427	0.372663	0.318605	0.346812	0.342347	0.273961	0.283799	0.221209	0.291986	0.375539	0.273264	0.324244	0.273935	0.298807	0.305391	0.344771	0.27375	NA	0.327672	0.351771	0.302162	0.281493	0.352342	0.356339	0.352319	0.294812	0.350904	0.343775	0.361662	0.34374	0.31225	0.301721	0.32605	0.349148	0.268428	0.358638	0.354228	0.336139	0.343871	0.273893	0.35453	0.351857	0.284036	0.263843	0.288359	0.248565	0.280548	0.354392	0.341981
CRN	0.341833	0.351994	0.336889	0.336691	0.336389	0.2623	0.283847	0.223843	0.280494	0.347727	0.273176	0.297784	0.341401	0.294381	0.32989	0.344352	0.278042	0.327672	NA	0.328734	0.282281	0.282083	0.335678	0.339851	0.33939	0.290894	0.33129	0.331851	0.346687	0.336945	0.291215	0.279151	0.305008	0.339283	0.308061	0.347843	0.339055	0.321893	0.333428	0.316824	0.332593	0.330495	0.295845	0.297477	0.343044	0.271294	0.342839	0.318401	0.333732
CRW	0.355961	0.358297	0.351995	0.342566	0.337543	0.269953	0.277102	0.220031	0.301077	0.377159	0.267947	0.325688	0.289163	0.298729	0.29273	0.352654	0.266162	0.351771	0.328734	NA	0.27628	0.27799	0.355495	0.358068	0.354488	0.316056	0.357227	0.344966	0.356998	0.354453	0.312983	0.303765	0.326299	0.352823	0.271315	0.356255	0.359939	0.341141	0.352587	0.271117	0.35546	0.356579	0.282862	0.267219	0.292622	0.256087	0.289821	0.3445	0.336755
Czech_Pavlov1	0.285538	0.291884	0.271036	0.275891	0.286072	0.252642	0.332256	0.22921	0.243498	0.353048	0.288359	0.286045	0.287086	0.259562	0.262543	0.247613	0.272791	0.302162	0.282281	0.27628	NA	0.323439	0.270222	0.277026	0.282211	0.235805	0.279408	0.276842	0.289809	0.265087	0.278562	0.255385	0.272293	0.31891	0.281347	0.285123	0.284143	0.279394	0.283537	0.284788	0.2821	0.279921	0.311772	0.276205	0.269633	0.267276	0.284287	0.279569	0.292156
Czech_Vestonice	0.275244	0.282086	0.269848	0.278785	0.274472	0.253649	0.346511	0.2226	0.254369	0.291521	0.282433	0.25158	0.277438	0.264829	0.279327	0.274877	0.272225	0.281493	0.282083	0.27799	0.323439	NA	0.278464	0.278288	0.278971	0.251064	0.275805	0.275441	0.279202	0.275209	0.269238	0.257781	0.26963	0.279131	0.277361	0.281148	0.277146	0.272993	0.271798	0.27605	0.277468	0.276517	0.287555	0.271258	0.27572	0.244807	0.273222	0.277968	0.271448
Denmark_Syltholm	0.363328	0.369015	0.331789	0.348897	0.341744	0.271212	0.271466	0.219452	0.313984	0.373443	0.267812	0.336494	0.296424	0.301989	0.291593	0.35371	0.273666	0.352342	0.335678	0.355495	0.270222	0.278464	NA	0.366085	0.361505	0.30127	0.358461	0.354742	0.363416	0.35365	0.311278	0.304213	0.326332	0.354816	0.271215	0.359997	0.361298	0.345354	0.336708	0.276653	0.362701	0.363093	0.28565	0.266587	0.292557	0.270999	0.29251	0.343222	0.34498
DOB	0.367189	0.374203	0.353085	0.35023	0.344164	0.264542	0.277335	0.218604	0.304651	0.396768	0.268488	0.333525	0.292986	0.308048	0.302045	0.367481	0.278562	0.356339	0.339851	0.358068	0.277026	0.278288	0.366085	NA	0.365866	0.319282	0.356152	0.357461	0.372488	0.359962	0.309971	0.297152	0.326198	0.363629	0.27591	0.367829	0.372938	0.342077	0.361207	0.275026	0.361114	0.356492	0.281818	0.268451	0.300716	0.260174	0.301178	0.347303	0.350515
DOG	0.369821	0.372797	0.35354	0.352098	0.342284	0.265685	0.284603	0.219196	0.298132	0.399473	0.268203	0.325452	0.300377	0.303494	0.292742	0.37688	0.268806	0.352319	0.33939	0.354488	0.282211	0.278971	0.361505	0.365866	NA	0.296305	0.352264	0.355733	0.372306	0.372955	0.304226	0.29966	0.320259	0.363032	0.274081	0.36854	0.362638	0.337347	0.347538	0.279916	0.357659	0.356132	0.285881	0.265795	0.299194	0.261298	0.30125	0.339898	0.362587
DON005	0.3056	0.315796	0.476829	0.297567	0.303614	0.264259	0.238588	0.227164	0.335872	0.475257	0.259657	0.25438	0.355263	0.28458	0.346653	0.183615	0.497804	0.294812	0.290894	0.316056	0.235805	0.251064	0.30127	0.319282	0.296305	NA	0.315176	0.316685	0.309215	0.344712	0.297182	0.310352	0.281987	0.326041	0.261478	0.315191	0.295779	0.290478	0.261742	0.257334	0.309848	0.309663	0.253607	0.245324	0.262638	0.137575	0.298292	0.294445	0.32576
DRI	0.356102	0.359533	0.360975	0.340991	0.337998	0.26567	0.27643	0.218485	0.300877	0.382071	0.265707	0.313085	0.286011	0.297774	0.29358	0.345218	0.286221	0.350904	0.33129	0.357227	0.279408	0.275805	0.358461	0.356152	0.352264	0.315176	NA	0.343227	0.359326	0.3477	0.309115	0.292665	0.322905	0.3475	0.269315	0.355589	0.355915	0.341586	0.347114	0.275168	0.355877	0.354961	0.278395	0.265942	0.294717	0.276327	0.29335	0.340292	0.340609
England_AvelinesHole.SG	0.357992	0.365496	0.334406	0.341931	0.340551	0.262762	0.274545	0.218201	0.29083	0.376189	0.263005	0.334273	0.344538	0.313317	0.307045	0.387873	0.280909	0.343775	0.331851	0.344966	0.276842	0.275441	0.354742	0.357461	0.355733	0.316685	0.343227	NA	0.369556	0.331142	0.299673	0.290131	0.312919	0.364781	0.272917	0.366877	0.354338	0.331941	0.354918	0.285068	0.347949	0.349642	0.27863	0.2664	0.298904	0.278614	0.30311	0.332302	0.370402
England_GoughsCave.SG	0.375027	0.379831	0.376139	0.352276	0.348964	0.268579	0.285257	0.218837	0.301658	0.407938	0.271323	0.324401	0.297541	0.302733	0.290445	0.372554	0.276148	0.361662	0.346687	0.356998	0.289809	0.279202	0.363416	0.372488	0.372306	0.309215	0.359326	0.369556	NA	0.376654	0.308878	0.294581	0.327959	0.366908	0.275787	0.378894	0.369448	0.345963	0.356016	0.283535	0.362577	0.359293	0.285182	0.27189	0.303465	0.27001	0.304931	0.347703	0.353164
England_KentsCavern.SG	0.363288	0.37432	0.362462	0.352924	0.339916	0.260703	0.287606	0.211658	0.281263	0.330155	0.259813	0.302206	0.28242	0.304156	0.311295	0.360165	0.246522	0.34374	0.336945	0.354453	0.265087	0.275209	0.35365	0.359962	0.372955	0.344712	0.3477	0.331142	0.376654	NA	0.297921	0.291526	0.314341	0.360672	0.258637	0.384025	0.36272	0.337082	0.366299	0.273901	0.348648	0.350713	0.261253	0.267725	0.28505	0.276928	0.287846	0.333952	0.382333
Estonia_CCC	0.303866	0.310231	0.288676	0.305172	0.308241	0.264081	0.269144	0.222715	0.306725	0.316904	0.258602	0.278383	0.278729	0.288148	0.259194	0.306606	0.268386	0.31225	0.291215	0.312983	0.278562	0.269238	0.311278	0.309971	0.304226	0.297182	0.309115	0.299673	0.308878	0.297921	NA	0.312075	0.313792	0.298802	0.259923	0.307624	0.310847	0.304266	0.303716	0.265941	0.308794	0.309777	0.272315	0.260545	0.277504	0.265626	0.273568	0.311708	0.306937
Estonia_CCC.SG	0.292028	0.293286	0.292017	0.296765	0.297874	0.256162	0.271185	0.217284	0.337753	0.274449	0.252444	0.282422	0.264838	0.273904	0.287868	0.275681	0.2555	0.301721	0.279151	0.303765	0.255385	0.257781	0.304213	0.297152	0.29966	0.310352	0.292665	0.290131	0.294581	0.291526	0.312075	NA	0.306153	0.282138	0.257718	0.294139	0.296117	0.290617	0.282001	0.247559	0.299887	0.298996	0.270556	0.256157	0.265917	0.223613	0.261406	0.297356	0.294222
Estonia_Narva	0.322851	0.326392	0.311916	0.319371	0.316113	0.265586	0.272422	0.220563	0.298572	0.352662	0.262397	0.296285	0.262105	0.289969	0.256355	0.330343	0.26987	0.32605	0.305008	0.326299	0.272293	0.26963	0.326332	0.326198	0.320259	0.281987	0.322905	0.312919	0.327959	0.314341	0.313792	0.306153	NA	0.315512	0.262359	0.327024	0.324658	0.317371	0.322612	0.262064	0.327165	0.325461	0.274377	0.259821	0.281363	0.267469	0.278186	0.325034	0.308661
Falkenstein	0.366493	0.37626	0.310293	0.354057	0.341034	0.263332	0.28361	0.220095	0.285769	0.393784	0.262917	0.320158	0.283234	0.280668	0.298512	0.37634	0.245456	0.349148	0.339283	0.352823	0.31891	0.279131	0.354816	0.363629	0.363032	0.326041	0.3475	0.364781	0.366908	0.360672	0.298802	0.282138	0.315512	NA	0.271516	0.380435	0.370036	0.33162	0.342661	0.278565	0.349714	0.353779	0.280934	0.264229	0.293851	0.251369	0.295824	0.336883	0.357685
FRL	0.273102	0.273199	0.269105	0.283034	0.275204	0.247829	0.28029	0.230907	0.253135	0.294993	0.278009	0.247433	0.336403	0.262531	0.332866	0.280689	0.284613	0.268428	0.308061	0.271315	0.281347	0.277361	0.271215	0.27591	0.274081	0.261478	0.269315	0.272917	0.275787	0.258637	0.259923	0.257718	0.262359	0.271516	NA	0.272993	0.27243	0.266453	0.27049	0.356013	0.271618	0.272681	0.306454	0.337709	0.328248	0.267865	0.330947	0.267836	0.271237
FRM	0.375067	0.385333	0.373814	0.357127	0.35485	0.267496	0.285782	0.221589	0.283461	0.420651	0.267817	0.329595	0.298957	0.316218	0.260354	0.362519	0.282171	0.358638	0.347843	0.356255	0.285123	0.281148	0.359997	0.367829	0.36854	0.315191	0.355589	0.366877	0.378894	0.384025	0.307624	0.294139	0.327024	0.380435	0.272993	NA	0.365181	0.349856	0.353816	0.279317	0.359869	0.356499	0.294549	0.269216	0.30257	0.271482	0.309525	0.344499	0.370611
Germany_BadDurrenberg	0.365912	0.374047	0.356109	0.350777	0.347781	0.26922	0.284488	0.216801	0.294307	0.404395	0.268701	0.330082	0.29126	0.300478	0.295898	0.369397	0.247208	0.354228	0.339055	0.359939	0.284143	0.277146	0.361298	0.372938	0.362638	0.295779	0.355915	0.354338	0.369448	0.36272	0.310847	0.296117	0.324658	0.370036	0.27243	0.365181	NA	0.345246	0.357143	0.277922	0.362473	0.359406	0.28232	0.272978	0.300798	0.268125	0.301199	0.344376	0.357287
Germany_Blatterhohle	0.340625	0.344792	0.334326	0.336297	0.327343	0.275312	0.280462	0.219668	0.296778	0.36011	0.26426	0.316724	0.291432	0.303371	0.282566	0.333596	0.266499	0.336139	0.321893	0.341141	0.279394	0.272993	0.345354	0.342077	0.337347	0.290478	0.341586	0.331941	0.345963	0.337082	0.304266	0.290617	0.317371	0.33162	0.266453	0.349856	0.345246	NA	0.334729	0.274299	0.341382	0.338157	0.279734	0.266892	0.290177	0.254742	0.288966	0.330185	0.324532
Germany_Bottendorf	0.359406	0.357978	0.363795	0.33657	0.340453	0.268136	0.276499	0.213313	0.292652	0.354478	0.258863	0.324235	0.224085	0.2959	0.247196	0.338591	0.273101	0.343871	0.333428	0.352587	0.283537	0.271798	0.336708	0.361207	0.347538	0.261742	0.347114	0.354918	0.356016	0.366299	0.303716	0.282001	0.322612	0.342661	0.27049	0.353816	0.357143	0.334729	NA	0.262754	0.354152	0.353513	0.265922	0.263776	0.288447	0.243399	0.267113	0.345688	0.335257
GER_new	0.280108	0.277667	0.265899	0.286637	0.282143	0.253043	0.284568	0.230436	0.276404	0.287903	0.276708	0.264425	0.35416	0.2667	0.332755	0.29775	0.312149	0.273893	0.316824	0.271117	0.284788	0.27605	0.276653	0.275026	0.279916	0.257334	0.275168	0.285068	0.283535	0.273901	0.265941	0.247559	0.262064	0.278565	0.356013	0.279317	0.277922	0.274299	0.262754	NA	0.276837	0.276702	0.32424	0.331708	0.331335	0.29262	0.344902	0.272579	0.280737
GFW_1	0.358351	0.366835	0.347065	0.34814	0.341409	0.267541	0.279696	0.219801	0.300295	0.380869	0.267888	0.33021	0.297983	0.298503	0.291949	0.350406	0.278583	0.35453	0.332593	0.35546	0.2821	0.277468	0.362701	0.361114	0.357659	0.309848	0.355877	0.347949	0.362577	0.348648	0.308794	0.299887	0.327165	0.349714	0.271618	0.359869	0.362473	0.341382	0.354152	0.276837	NA	0.356335	0.282125	0.266145	0.297502	0.266952	0.293833	0.344654	0.342287
GFW_2	0.359182	0.366554	0.353764	0.342759	0.340339	0.268568	0.282422	0.218823	0.303142	0.37224	0.266948	0.328793	0.290609	0.305225	0.287818	0.357284	0.273958	0.351857	0.330495	0.356579	0.279921	0.276517	0.363093	0.356492	0.356132	0.309663	0.354961	0.349642	0.359293	0.350713	0.309777	0.298996	0.325461	0.353779	0.272681	0.356499	0.359406	0.338157	0.353513	0.276702	0.356335	NA	0.28432	0.26986	0.293544	0.260995	0.296694	0.343692	0.347132
GOY	0.28057	0.285755	0.301024	0.283381	0.284053	0.254639	0.283702	0.225074	0.261762	0.290143	0.280756	0.263979	0.301063	0.274844	0.318443	0.280916	0.27941	0.284036	0.295845	0.282862	0.311772	0.287555	0.28565	0.281818	0.285881	0.253607	0.278395	0.27863	0.285182	0.261253	0.272315	0.270556	0.274377	0.280934	0.306454	0.294549	0.28232	0.279734	0.265922	0.32424	0.282125	0.28432	NA	0.29193	0.29536	0.24988	0.306001	0.27831	0.280978
GoyetQ116-1	0.271644	0.264757	0.2646	0.279158	0.271267	0.247099	0.274166	0.227956	0.249982	0.287187	0.275565	0.235765	0.300899	0.255847	0.302958	0.267637	0.272342	0.263843	0.297477	0.267219	0.276205	0.271258	0.266587	0.268451	0.265795	0.245324	0.265942	0.2664	0.27189	0.267725	0.260545	0.256157	0.259821	0.264229	0.337709	0.269216	0.272978	0.266892	0.263776	0.331708	0.266145	0.26986	0.29193	NA	0.312659	0.304716	0.313848	0.264452	0.268774
GoyetQ2	0.300164	0.296338	0.296519	0.305165	0.299678	0.256826	0.276131	0.221371	0.262616	0.333347	0.2735	0.268423	0.415917	0.26941	0.411841	0.309496	0.27291	0.288359	0.343044	0.292622	0.269633	0.27572	0.292557	0.300716	0.299194	0.262638	0.294717	0.298904	0.303465	0.28505	0.277504	0.265917	0.281363	0.293851	0.328248	0.30257	0.300798	0.290177	0.288447	0.331335	0.297502	0.293544	0.29536	0.312659	NA	0.259581	0.417507	0.285111	0.294056
GoyetQ376-3	0.262286	0.265657	0.268856	0.257109	0.267134	0.256016	0.245077	0.218177	0.246049	0.306459	0.247564	0.243829	0.257851	0.248577	0.176097	0.261239	0.239246	0.248565	0.271294	0.256087	0.267276	0.244807	0.270999	0.260174	0.261298	0.137575	0.276327	0.278614	0.27001	0.276928	0.265626	0.223613	0.267469	0.251369	0.267865	0.271482	0.268125	0.254742	0.243399	0.29262	0.266952	0.260995	0.24988	0.304716	0.259581	NA	0.274252	0.273414	0.265029
HohleFels	0.295934	0.294643	0.306416	0.312798	0.299022	0.256448	0.28801	0.224167	0.257784	0.33335	0.270538	0.271351	0.42588	0.285815	0.39804	0.314688	0.291091	0.280548	0.342839	0.289821	0.284287	0.273222	0.29251	0.301178	0.30125	0.298292	0.29335	0.30311	0.304931	0.287846	0.273568	0.261406	0.278186	0.295824	0.330947	0.309525	0.301199	0.288966	0.267113	0.344902	0.293833	0.296694	0.306001	0.313848	0.417507	0.274252	NA	0.284156	0.304775
Hungary_Koros	0.34411	0.349836	0.336208	0.340802	0.332528	0.272251	0.282066	0.220797	0.302061	0.369803	0.266052	0.316965	0.294852	0.297474	0.295843	0.341329	0.267918	0.354392	0.318401	0.3445	0.279569	0.277968	0.343222	0.347303	0.339898	0.294445	0.340292	0.332302	0.347703	0.333952	0.311708	0.297356	0.325034	0.336883	0.267836	0.344499	0.344376	0.330185	0.345688	0.272579	0.344654	0.343692	0.27831	0.264452	0.285111	0.273414	0.284156	NA	0.327272
Iboussieres	0.347963	0.380883	0.337055	0.331907	0.332429	0.25474	0.265975	0.214271	0.291754	0.384807	0.264687	0.320268	0.326362	0.310095	0.289745	0.35619	0.247075	0.341981	0.333732	0.336755	0.292156	0.271448	0.34498	0.350515	0.362587	0.32576	0.340609	0.370402	0.353164	0.382333	0.306937	0.294222	0.308661	0.357685	0.271237	0.370611	0.357287	0.324532	0.335257	0.280737	0.342287	0.347132	0.280978	0.268774	0.294056	0.265029	0.304775	0.327272	NA
IGR001	0.308219	0.305444	0.301158	0.307063	0.304656	0.263254	0.266228	0.217285	0.304859	0.333651	0.254804	0.283493	0.257295	0.278209	0.264552	0.291799	0.274196	0.313063	0.286767	0.308077	0.263347	0.261303	0.311558	0.303992	0.303698	0.287017	0.306841	0.299763	0.306337	0.293296	0.306851	0.301209	0.306379	0.301897	0.254893	0.307589	0.307122	0.299789	0.299883	0.262298	0.309521	0.309474	0.266217	0.252974	0.26918	0.245922	0.265338	0.311178	0.302753
Ireland_Mesolithic	0.374017	0.379576	0.366176	0.353147	0.34737	0.265502	0.280091	0.218031	0.29939	0.387973	0.266811	0.316878	0.287181	0.300966	0.273378	0.372358	0.268509	0.358761	0.342255	0.357739	0.287179	0.277878	0.36318	0.36741	0.368478	0.304804	0.356577	0.362079	0.380938	0.366799	0.304961	0.294174	0.323257	0.368622	0.270865	0.377211	0.365698	0.341506	0.355101	0.277148	0.358327	0.357823	0.278817	0.268003	0.297746	0.269302	0.29512	0.342638	0.356595
Italy_GrottaContinenza_R11.SG	0.375108	0.408846	0.382473	0.355174	0.350885	0.267405	0.283622	0.218205	0.290415	0.398326	0.274201	0.322704	0.296126	0.309652	0.293269	0.384138	0.262962	0.374408	0.352114	0.357769	0.298137	0.282159	0.367933	0.369684	0.367603	0.292864	0.359838	0.363174	0.381235	0.373	0.304006	0.294622	0.32373	0.368159	0.272105	0.375492	0.369131	0.343449	0.352246	0.278564	0.359231	0.360588	0.283446	0.268773	0.299906	0.264566	0.297302	0.346924	0.366911
Italy_GrottaContinenza_R15.SG	0.379174	0.411141	0.379216	0.358545	0.353437	0.269015	0.288867	0.21912	0.295843	0.403371	0.274913	0.329426	0.301569	0.307541	0.298862	0.376791	0.275368	0.37167	0.353678	0.358094	0.293345	0.28327	0.367999	0.373118	0.372636	0.309927	0.363912	0.367916	0.384034	0.374105	0.308236	0.297333	0.326019	0.370343	0.275622	0.378177	0.375206	0.345221	0.362304	0.280612	0.363587	0.366073	0.28418	0.271029	0.300344	0.268431	0.297507	0.351394	0.369585
Italy_GrottaContinenza_R7.SG	0.375687	0.411056	0.375481	0.361313	0.355429	0.267632	0.286562	0.220219	0.296234	0.404288	0.274171	0.333234	0.293135	0.307381	0.281428	0.373903	0.26602	0.371887	0.353864	0.362453	0.285989	0.283336	0.369256	0.374786	0.374359	0.306241	0.362793	0.362882	0.385161	0.372297	0.308004	0.297763	0.3261	0.373364	0.272679	0.378724	0.372393	0.348697	0.365831	0.275663	0.365556	0.366095	0.287226	0.271133	0.297894	0.272179	0.294411	0.351123	0.373867
Italy_OrienteC	0.368715	0.402874	0.361507	0.353581	0.348585	0.267171	0.289871	0.21947	0.296366	0.393267	0.271938	0.322185	0.294275	0.315713	0.291845	0.395023	0.259252	0.362611	0.352186	0.357032	0.292018	0.280151	0.352468	0.361408	0.363132	0.315689	0.355668	0.362551	0.375037	0.3637	0.308769	0.299559	0.316497	0.359545	0.269831	0.366648	0.363717	0.342783	0.36011	0.274314	0.35973	0.355446	0.287381	0.268932	0.293562	0.256935	0.288817	0.346169	0.379195
Italy_Ostuni1	0.273992	0.281335	0.282003	0.272068	0.272203	0.256662	0.303877	0.220421	0.244431	0.283424	0.27895	0.255555	0.261069	0.265015	0.255702	0.281377	0.269234	0.279003	0.279459	0.271032	0.309073	0.304863	0.268009	0.278727	0.276604	0.253446	0.270948	0.27628	0.277222	0.269611	0.270244	0.25355	0.266971	0.272873	0.272282	0.285376	0.273545	0.270163	0.273493	0.279689	0.27334	0.276835	0.302706	0.26616	0.270959	0.252952	0.274176	0.273924	0.273592
Italy_Uzzo_EM	0.374278	0.414491	0.367262	0.359738	0.354859	0.266675	0.292272	0.222732	0.291629	0.391726	0.274627	0.330934	0.297835	0.30574	0.285526	0.370464	0.261616	0.367714	0.352148	0.358187	0.293791	0.281928	0.362774	0.372022	0.371478	0.319463	0.36087	0.364169	0.378549	0.372293	0.304112	0.294423	0.323275	0.370362	0.271392	0.382144	0.367354	0.344364	0.360211	0.276682	0.363754	0.362261	0.286257	0.269878	0.293148	0.261301	0.295626	0.348825	0.376233
Italy_Uzzo_LM	0.35764	0.376495	0.351428	0.34828	0.342931	0.267804	0.283387	0.219519	0.296497	0.3789	0.267894	0.321024	0.292545	0.300658	0.286131	0.354962	0.277085	0.362828	0.335319	0.350051	0.2841	0.278403	0.355565	0.355545	0.354991	0.307861	0.350252	0.346849	0.361731	0.353986	0.308811	0.299315	0.324956	0.352968	0.26929	0.358921	0.355748	0.336226	0.348711	0.273446	0.353148	0.352592	0.282866	0.264755	0.292372	0.264891	0.289505	0.34642	0.347437
Italy_Villabruna	0.359369	0.381459	0.356557	0.34893	0.340315	0.265262	0.286949	0.220307	0.295518	0.379235	0.270532	0.328577	0.276406	0.303328	0.286546	0.355342	0.275937	0.366303	0.331732	0.349408	0.287546	0.278872	0.354422	0.353698	0.355322	0.297511	0.348323	0.348451	0.358353	0.348897	0.304008	0.291323	0.32195	0.3562	0.265583	0.367378	0.357447	0.335503	0.349084	0.272143	0.352528	0.349929	0.281655	0.265224	0.286148	0.271818	0.286763	0.346119	0.353511
JAZ	0.298411	0.295615	0.307642	0.298887	0.296646	0.261231	0.262188	0.219147	0.322245	0.326169	0.256604	0.27275	0.265573	0.281577	0.266378	0.294625	0.288273	0.306603	0.286578	0.304501	0.261797	0.263103	0.307793	0.301347	0.296383	0.278386	0.301188	0.290313	0.296286	0.289721	0.322714	0.314553	0.312186	0.293944	0.259691	0.301304	0.301341	0.294368	0.298618	0.262643	0.303195	0.303452	0.263027	0.257471	0.270904	0.257447	0.269152	0.302418	0.293977
KAR	0.27876	0.283655	0.296636	0.275216	0.282197	0.252419	0.253836	0.222104	0.319107	0.29533	0.249789	0.278607	0.308399	0.267912	0.280274	0.276251	0.281471	0.287198	0.275735	0.286832	0.247613	0.254692	0.289331	0.284537	0.283434	0.243082	0.284453	0.274595	0.280292	0.276162	0.309711	0.313501	0.296144	0.264686	0.255432	0.284748	0.283609	0.282376	0.271355	0.265996	0.288752	0.289802	0.263261	0.2583	0.264388	0.253496	0.273623	0.291001	0.320117
KRZ	0.348191	0.355452	0.286275	0.336104	0.336337	0.271619	0.290249	0.226214	0.289724	0.307167	0.271913	0.307815	0.250916	0.290099	0.285354	0.341705	0.285511	0.335831	0.323468	0.348439	0.267546	0.275025	0.346536	0.348691	0.349903	0.325151	0.3366	0.333224	0.347988	0.34637	0.298585	0.310501	0.324596	0.346692	0.272733	0.354067	0.35016	0.331116	0.35368	0.269398	0.351252	0.346672	0.297881	0.275096	0.29259	0.257588	0.315367	0.341465	0.32322
KVH	0.281607	0.284388	0.266355	0.289202	0.286174	0.256694	0.266259	0.218634	0.31026	0.287201	0.249433	0.262596	0.267055	0.268427	0.255014	0.292915	0.270971	0.285726	0.274546	0.293379	0.262038	0.256982	0.297826	0.287936	0.28675	0.28755	0.2849	0.283442	0.286515	0.278978	0.312775	0.314096	0.305195	0.283264	0.252896	0.286654	0.285708	0.282663	0.291493	0.255245	0.287649	0.291339	0.258408	0.25372	0.263124	0.236984	0.263723	0.292728	0.296913
Latvia_Zvejnieki	0.336952	0.340792	0.327535	0.331461	0.327099	0.267359	0.277601	0.220694	0.305484	0.361578	0.265033	0.311885	0.284242	0.293845	0.281031	0.336321	0.274082	0.339768	0.314566	0.33714	0.277696	0.273075	0.339643	0.339028	0.335312	0.300416	0.334624	0.328815	0.338621	0.330586	0.316304	0.306059	0.33007	0.330851	0.268355	0.340213	0.338767	0.326074	0.334846	0.271194	0.337706	0.337583	0.277588	0.265331	0.288454	0.266366	0.286465	0.335564	0.329124
Latvia_Zvejnieki_MN	0.306076	0.308906	0.299634	0.308696	0.30473	0.262251	0.268649	0.220301	0.313572	0.325627	0.256428	0.281865	0.278514	0.28207	0.279503	0.312567	0.272427	0.31423	0.293097	0.312145	0.269457	0.265184	0.313815	0.31119	0.307332	0.296743	0.30998	0.301628	0.308951	0.300778	0.321142	0.315105	0.319058	0.30359	0.261481	0.309842	0.311225	0.304309	0.308341	0.264342	0.310387	0.31124	0.268579	0.259696	0.275604	0.261296	0.272958	0.312702	0.301291
Lithuania_Donkalnis	0.346843	0.358241	0.401011	0.323712	0.330077	0.276002	0.268094	0.221229	0.271123	0.461819	0.254672	0.362619	0.316127	0.320763	0.155191	0.353562	0.189613	0.346293	0.314007	0.324577	0.281202	0.275517	0.331926	0.339359	0.34291	0.329955	0.339553	0.334126	0.34603	0.342349	0.302703	0.281016	0.32452	0.267698	0.275038	0.315349	0.338887	0.340087	0.368316	0.265275	0.337596	0.330554	0.264653	0.258902	0.282	0.290494	0.264	0.33531	0.390884
Lithuania_Narva	0.341512	0.346103	0.330311	0.334215	0.330835	0.269832	0.277348	0.221987	0.299591	0.361824	0.264163	0.312193	0.286031	0.297921	0.279743	0.34305	0.275469	0.345487	0.319	0.341902	0.280782	0.273935	0.345172	0.344462	0.339921	0.301702	0.338292	0.333901	0.344484	0.331075	0.313868	0.299905	0.326886	0.335608	0.268156	0.343512	0.343963	0.329747	0.338915	0.270046	0.342905	0.343666	0.27745	0.263344	0.288554	0.267392	0.285609	0.339859	0.33427
Lithuania_Spiginas	0.349563	0.35764	0.341095	0.337634	0.339143	0.272405	0.280898	0.221673	0.307474	0.365424	0.266853	0.318063	0.28208	0.297376	0.265625	0.355018	0.281041	0.352753	0.322944	0.35036	0.279431	0.276283	0.347178	0.349669	0.347053	0.29961	0.344166	0.341691	0.34983	0.342646	0.311726	0.300666	0.328678	0.347531	0.269897	0.351583	0.348632	0.333601	0.341985	0.272411	0.348954	0.351271	0.283101	0.268063	0.29213	0.271632	0.285617	0.345137	0.350483
LMA	0.308501	0.325402	0.253651	0.328839	0.313041	0.255817	0.277789	0.238332	0.289046	0.334733	0.277877	0.258591	0.387654	0.304363	0.367528	0.376168	0.262229	0.300035	0.341295	0.299731	0.315381	0.285354	0.30461	0.320276	0.318699	0.267211	0.310086	0.323209	0.31395	0.297552	0.273899	0.283832	0.287975	0.314094	0.328711	0.3382	0.311919	0.296557	0.326864	0.339296	0.311754	0.302889	0.295905	0.308464	0.359922	0.24249	0.354801	0.301583	0.301951
LPI	0.28752	0.275823	0.310909	0.298655	0.286062	0.263865	0.282015	0.223021	0.251986	0.30182	0.274088	0.242494	0.407336	0.253393	0.326269	0.297759	0.344359	0.257932	0.318674	0.273371	0.280305	0.267074	0.291614	0.276212	0.281842	0.223084	0.28888	0.268614	0.279283	0.26108	0.265249	0.23945	0.274707	0.261008	0.330238	0.271849	0.279915	0.278046	0.292754	0.336101	0.275394	0.275348	0.288278	0.309525	0.339256	0.255773	0.353613	0.276541	0.253392
LRO	0.282471	0.269979	0.206315	0.24456	0.280595	0.273696	0.289118	0.231823	0.303921	0.334225	0.287647	0.356536	0.20547	0.260591	0.383227	0.347495	0.283662	0.255294	0.317985	0.268626	0.289597	0.27146	0.300026	0.289621	0.27479	0.260368	0.282601	0.227932	0.296947	0.180241	0.273965	0.276195	0.293163	0.326838	0.361459	0.228989	0.266218	0.285053	0.28435	0.371127	0.285435	0.283796	0.309367	0.347686	0.348381	0.442097	0.313992	0.277448	0.264623
Luxembourg_Loschbour.DG	0.378094	0.389152	0.372112	0.356991	0.352088	0.269653	0.285993	0.219781	0.295088	0.404197	0.269769	0.32454	0.295445	0.305736	0.290107	0.375402	0.274422	0.361242	0.349505	0.360457	0.284468	0.280361	0.366942	0.374687	0.37498	0.31391	0.359259	0.366766	0.38476	0.36708	0.307374	0.298994	0.32745	0.369152	0.275424	0.382385	0.370972	0.347906	0.361206	0.28313	0.364014	0.362887	0.288304	0.276201	0.303961	0.261958	0.304277	0.346876	0.363062
MAF	0.377566	0.387141	0.374566	0.360385	0.349477	0.265605	0.28527	0.221715	0.289549	0.419109	0.274331	0.326617	0.300565	0.313713	0.298144	0.377567	0.30156	0.357783	0.347162	0.365093	0.296252	0.279951	0.357431	0.371702	0.373794	0.336506	0.361491	0.366319	0.385518	0.381485	0.31554	0.294055	0.328468	0.383765	0.27589	0.387553	0.376728	0.347017	0.364314	0.289914	0.363303	0.359907	0.283764	0.273826	0.305029	0.250722	0.301918	0.347347	0.387311
MAZ001	0.247163	0.254871	0.291354	0.258747	0.24756	0.241492	0.249147	0.200098	0.258672	0.291072	0.229966	0.268654	0.366604	0.253629	0.20425	0.224278	0.277721	0.238228	0.245085	0.269981	0.202656	0.236935	0.266981	0.260469	0.255401	0.269269	0.254511	0.24587	0.251323	0.257422	0.255442	0.239976	0.251569	0.260914	0.232899	0.252688	0.262844	0.244064	0.271294	0.28229	0.24995	0.251462	0.239796	0.2381	0.259112	0.191489	0.250618	0.252128	0.242758
MAZ003	0.290408	0.28572	0.280017	0.300677	0.293599	0.252719	0.273111	0.227488	0.257253	0.3043	0.27108	0.262366	0.33492	0.2648	0.338333	0.267832	0.310608	0.291634	0.329677	0.283124	0.272047	0.27146	0.282314	0.29229	0.290222	0.282338	0.288467	0.281558	0.292187	0.263388	0.270898	0.253215	0.275014	0.283237	0.330613	0.294292	0.286711	0.281445	0.283467	0.333873	0.28771	0.281972	0.29581	0.309152	0.370974	0.248761	0.354033	0.280494	0.284013
MesoFr	0.370625	0.380506	0.373797	0.358028	0.354022	0.267145	0.279245	0.218175	0.291323	0.373104	0.267692	0.344035	0.329762	0.298346	0.293863	0.375824	0.28354	0.353359	0.349608	0.355601	0.285338	0.277593	0.364736	0.366003	0.367129	0.327657	0.352803	0.358072	0.377366	0.366394	0.299731	0.295626	0.321205	0.370694	0.273386	0.375112	0.364727	0.341719	0.352371	0.281619	0.358103	0.355443	0.284753	0.272578	0.30262	0.25766	0.307682	0.341905	0.379008
MNN_1	0.292565	0.293917	0.28358	0.2945	0.295124	0.262011	0.265836	0.220832	0.317914	0.299896	0.256033	0.27369	0.256771	0.27317	0.263976	0.295157	0.268821	0.299483	0.283153	0.298337	0.259108	0.264341	0.302668	0.295918	0.293845	0.290462	0.297801	0.285762	0.294835	0.283759	0.319455	0.314325	0.311533	0.284003	0.258904	0.294428	0.295222	0.290676	0.292474	0.260323	0.298762	0.301455	0.26595	0.256616	0.270244	0.256025	0.26942	0.301057	0.287635
MNN_2	0.284102	0.287862	0.276901	0.288353	0.287766	0.256038	0.260977	0.218726	0.316068	0.299859	0.252801	0.26439	0.277809	0.275547	0.278815	0.29122	0.249192	0.29557	0.275321	0.292503	0.261222	0.260609	0.298776	0.293107	0.288095	0.272538	0.292128	0.288302	0.289332	0.282913	0.314029	0.305716	0.306059	0.282865	0.256353	0.290124	0.289042	0.288084	0.285336	0.260203	0.293207	0.291319	0.262662	0.250849	0.266546	0.249804	0.265845	0.295056	0.28635
MNN_3	0.301096	0.301469	0.299586	0.289229	0.296913	0.258665	0.254656	0.220457	0.30857	0.310916	0.253402	0.279775	0.267629	0.271425	0.263907	0.291523	0.245236	0.304759	0.288067	0.305039	0.252132	0.264873	0.310526	0.302431	0.304219	0.329857	0.301151	0.301548	0.308491	0.271004	0.328545	0.3166	0.312134	0.28849	0.261129	0.299896	0.299807	0.29431	0.311149	0.263456	0.305924	0.310348	0.26863	0.262804	0.268746	0.241602	0.261381	0.308576	0.301048
MPR	0.388269	0.378763	0.367239	0.348166	0.345833	0.264332	0.278747	0.217988	0.293134	0.396392	0.267027	0.324698	0.296141	0.302359	0.310511	0.370598	0.264597	0.359025	0.340927	0.353257	0.288281	0.276886	0.363344	0.368459	0.37229	0.293733	0.35441	0.362549	0.376401	0.365912	0.306562	0.29452	0.322944	0.369248	0.272428	0.373688	0.363641	0.340632	0.358954	0.275514	0.359822	0.357465	0.278691	0.267489	0.297409	0.269802	0.296787	0.341654	0.351163
Muierii1	0.26435	0.267726	0.262604	0.263701	0.263295	0.254942	0.2731	0.220871	0.250542	0.280146	0.278792	0.240589	0.260018	0.258022	0.263252	0.26267	0.289343	0.269314	0.268637	0.262894	0.278765	0.275133	0.271568	0.26627	0.262498	0.262216	0.262514	0.257305	0.268396	0.257155	0.259381	0.252434	0.257979	0.264871	0.270741	0.265477	0.264724	0.263327	0.265819	0.264569	0.263301	0.267834	0.270836	0.270736	0.263486	0.243872	0.268598	0.26337	0.258873
MUR	0.290362	0.291415	0.282506	0.292406	0.29167	0.260047	0.265349	0.2199	0.309381	0.305606	0.255517	0.27108	0.261761	0.272961	0.270441	0.290327	0.26694	0.297254	0.279932	0.297571	0.267496	0.260513	0.298673	0.294482	0.292238	0.290918	0.291764	0.287543	0.292334	0.286869	0.318562	0.314803	0.308993	0.289182	0.257742	0.294305	0.293122	0.289418	0.293375	0.259666	0.295658	0.295042	0.262458	0.25713	0.267989	0.254451	0.264865	0.297723	0.284377
Norway_Hummervikholmen.SG	0.30881	0.308151	0.299038	0.309257	0.305543	0.264579	0.268117	0.218717	0.307151	0.307683	0.256691	0.279674	0.266545	0.275288	0.267676	0.307361	0.270208	0.312749	0.294468	0.312766	0.272288	0.264802	0.317086	0.3095	0.30779	0.27764	0.312741	0.300242	0.309363	0.296742	0.311904	0.310333	0.313765	0.302799	0.261667	0.304901	0.308599	0.30268	0.306911	0.259782	0.310915	0.312511	0.266139	0.257857	0.273704	0.269962	0.265738	0.310722	0.302353
Norway_Steigen.SG	0.309305	0.308663	0.309333	0.306758	0.306923	0.265503	0.263689	0.217449	0.313455	0.334156	0.254583	0.286779	0.306077	0.286623	0.273367	0.30838	0.26543	0.316738	0.292323	0.312915	0.261336	0.265055	0.317552	0.309675	0.308138	0.277773	0.310797	0.302096	0.309611	0.30255	0.316561	0.310234	0.312611	0.303718	0.260838	0.305456	0.307672	0.302005	0.305612	0.26219	0.311686	0.311633	0.265869	0.258961	0.272945	0.245834	0.270998	0.313653	0.295143
Oase1	0.206291	0.208992	0.225494	0.209876	0.2077	0.200137	0.204243	0.230324	0.197412	0.185262	0.205765	0.189932	0.233126	0.19826	0.1793	0.213308	0.215698	0.212689	0.210535	0.210393	0.215072	0.210555	0.203912	0.209215	0.210099	0.201538	0.206565	0.20518	0.21279	0.210192	0.210989	0.199981	0.211401	0.209462	0.215876	0.214605	0.212387	0.210621	0.199879	0.226503	0.207615	0.208332	0.223167	0.216764	0.200401	0.211163	0.209757	0.207722	0.208878
OKL	0.365429	0.383595	0.358754	0.352528	0.344071	0.269701	0.283507	0.219646	0.296251	0.394196	0.27371	0.318536	0.2913	0.301584	0.300642	0.362385	0.275391	0.359355	0.343183	0.352489	0.279701	0.280497	0.355396	0.361334	0.362207	0.295621	0.35408	0.35413	0.371136	0.363781	0.30439	0.29586	0.318586	0.354727	0.27648	0.371688	0.361534	0.339593	0.35318	0.28157	0.355019	0.355005	0.284739	0.270059	0.303062	0.264788	0.298607	0.342842	0.35125
ORM	0.273907	0.271808	0.276566	0.273455	0.271905	0.252146	0.283575	0.226155	0.249746	0.270466	0.271865	0.248436	0.284321	0.251578	0.294835	0.269516	0.262655	0.271681	0.299865	0.271966	0.278747	0.283885	0.273579	0.266691	0.270356	0.25967	0.26706	0.26818	0.273861	0.265879	0.260657	0.25301	0.262103	0.263641	0.346553	0.272699	0.269789	0.265353	0.265238	0.338753	0.269351	0.268401	0.298635	0.319033	0.316006	0.253206	0.317665	0.265291	0.274125
OST001	0.337137	0.340178	0.333135	0.324981	0.322387	0.267422	0.268918	0.215091	0.291692	0.36469	0.26054	0.296146	0.288218	0.300002	0.259104	0.329327	0.272273	0.341087	0.311855	0.33633	0.263932	0.270459	0.347155	0.338077	0.329347	0.275817	0.336668	0.332321	0.342358	0.33463	0.29702	0.280872	0.309841	0.337871	0.259494	0.331527	0.335575	0.325716	0.34172	0.277243	0.336718	0.333689	0.280411	0.261831	0.289017	0.260764	0.2888	0.330553	0.333468
OST002	0.337932	0.342192	0.331495	0.32984	0.322456	0.27092	0.273956	0.220069	0.288495	0.359984	0.266339	0.305539	0.285028	0.29344	0.289452	0.339966	0.284983	0.331829	0.315	0.333867	0.275872	0.272893	0.346841	0.339757	0.336899	0.308707	0.340675	0.330928	0.342778	0.327351	0.302851	0.292928	0.314607	0.335795	0.26861	0.334619	0.339725	0.330963	0.330902	0.274384	0.337986	0.338259	0.276821	0.266268	0.28831	0.26041	0.279184	0.326792	0.325272
OST003	0.347031	0.350562	0.339958	0.339496	0.334249	0.266176	0.279463	0.219007	0.296671	0.364257	0.263217	0.309671	0.289953	0.304382	0.297352	0.354888	0.259101	0.340853	0.324238	0.344273	0.278836	0.275995	0.350162	0.349841	0.343618	0.281007	0.346525	0.329197	0.350367	0.340473	0.305269	0.29389	0.319665	0.339085	0.266159	0.346225	0.347163	0.340029	0.339696	0.26908	0.346486	0.348819	0.274878	0.266145	0.294089	0.250786	0.287562	0.335159	0.333804
PA12	0.280639	0.284116	0.275156	0.279378	0.278383	0.255699	0.307977	0.223523	0.268432	0.302111	0.286276	0.260695	0.268977	0.262985	0.265504	0.28387	0.276114	0.285199	0.286134	0.275134	0.301733	0.306731	0.27847	0.280609	0.281141	0.24669	0.275907	0.275571	0.278386	0.271613	0.267326	0.256887	0.26912	0.273041	0.281	0.287903	0.280292	0.274617	0.274996	0.279195	0.280425	0.278996	0.308017	0.27246	0.278212	0.264563	0.272222	0.277895	0.276422
Paglicci133.pmd	0.269878	0.264985	0.12987	0.276742	0.273638	0.236049	0.282395	0.210428	0.26377	0.347042	0.279383	0.268109	0.264653	0.326104	0.248706	0.238284	0.290453	0.30829	0.27111	0.279722	0.301697	0.280534	0.249069	0.25096	0.269258	0.281648	0.243273	0.218152	0.260219	0.20308	0.229138	0.180204	0.249702	0.269492	0.275562	0.279702	0.263981	0.249734	0.185903	0.29434	0.256882	0.262715	0.301872	0.246742	0.236829	0.295793	0.26134	0.278897	0.265316
PES	0.288999	0.291467	0.285617	0.292453	0.294599	0.258691	0.264347	0.219726	0.319602	0.315295	0.256478	0.272559	0.258025	0.274683	0.268763	0.299254	0.278886	0.301103	0.280653	0.297076	0.266691	0.260481	0.303883	0.295291	0.291948	0.285395	0.294168	0.286179	0.29455	0.278773	0.316681	0.308633	0.306916	0.289064	0.259275	0.292974	0.29239	0.288171	0.287885	0.263178	0.294898	0.297546	0.267783	0.257579	0.269872	0.258675	0.271957	0.296689	0.275998
PIN.nopmd	0.299007	0.302997	0.276897	0.301514	0.302528	0.274763	0.259619	0.220833	0.252623	0.310315	0.26357	0.270375	0.395116	0.261407	0.443803	0.302941	0.243709	0.299691	0.334177	0.298518	0.268036	0.273002	0.294074	0.301955	0.300414	0.18824	0.287983	0.282928	0.303344	0.319096	0.273946	0.277471	0.290626	0.275672	0.317446	0.31524	0.306697	0.293869	0.305289	0.309591	0.292462	0.293523	0.293481	0.306289	0.404766	0.265581	0.417178	0.28848	0.299515
Poland_Konary_N22.SG	0.345838	0.350488	0.337064	0.33452	0.334084	0.270906	0.275894	0.217751	0.303841	0.365341	0.262921	0.31454	0.279653	0.297816	0.295902	0.328002	0.281331	0.351052	0.324377	0.345167	0.270949	0.272831	0.349006	0.348232	0.345547	0.313768	0.341607	0.336816	0.35395	0.339359	0.308145	0.301176	0.321721	0.336423	0.267439	0.3447	0.346651	0.328567	0.3429	0.270841	0.345881	0.347009	0.277595	0.262027	0.288056	0.265863	0.283991	0.340646	0.336676
Portugal_MoitadoSebastiao	0.332343	0.343498	0.321595	0.331917	0.329077	0.266251	0.285858	0.22498	0.264178	0.318129	0.271865	0.309843	0.405468	0.29443	0.370374	0.330413	0.25634	0.321174	0.364171	0.326284	0.296782	0.281235	0.331618	0.331888	0.332027	0.30683	0.322995	0.327288	0.340587	0.333448	0.279092	0.280167	0.297008	0.348867	0.314647	0.335864	0.333138	0.313363	0.335301	0.331468	0.32475	0.323948	0.297359	0.296696	0.352117	0.275973	0.346978	0.311038	0.333409
PRD	0.350892	0.35949	0.336547	0.343034	0.334067	0.270286	0.273055	0.220556	0.299993	0.364149	0.270924	0.316638	0.275569	0.301443	0.295294	0.370045	0.272712	0.353387	0.325657	0.350076	0.296372	0.277285	0.347066	0.348928	0.353093	0.278102	0.34481	0.361988	0.350341	0.337924	0.308058	0.299234	0.318317	0.337478	0.270611	0.351997	0.350636	0.330374	0.334372	0.278464	0.346901	0.347408	0.284522	0.263222	0.282699	0.251835	0.285447	0.341191	0.341423
Ranchot88	0.372603	0.383767	0.3693	0.354756	0.350724	0.267839	0.276996	0.219035	0.295641	0.403645	0.272112	0.334494	0.308617	0.31243	0.291175	0.373136	0.290021	0.355286	0.346156	0.354141	0.296957	0.280833	0.358183	0.370062	0.375911	0.292099	0.351318	0.378177	0.379543	0.377154	0.295539	0.297911	0.325912	0.367084	0.283169	0.38309	0.3674	0.339051	0.356183	0.284354	0.359965	0.362719	0.296211	0.268342	0.299467	0.279889	0.302677	0.347104	0.36653
RIE	0.256726	0.270906	0.320318	0.302	0.282809	0.255911	0.266968	0.216733	0.220705	0.240669	0.246585	0.241944	0.255189	0.268776	0.299808	0.211053	0.2606	0.266124	0.286934	0.270348	0.254855	0.248726	0.285796	0.291728	0.276467	0.309977	0.264435	0.275662	0.273658	0.220834	0.264103	0.241463	0.258758	0.264028	0.286914	0.237159	0.258546	0.264012	0.256555	0.29922	0.269558	0.290997	0.229205	0.270742	0.276477	0.212263	0.299636	0.270354	0.316661
Rigney1	0.304678	0.297268	0.252008	0.306534	0.292765	0.254462	0.271838	0.223697	0.275407	0.293613	0.269126	0.26515	0.402934	0.271382	0.388126	0.319645	0.280934	0.288827	0.343476	0.292929	0.257576	0.274894	0.294113	0.304578	0.299597	0.322635	0.29351	0.30477	0.310291	0.296306	0.267256	0.236603	0.273728	0.285722	0.327917	0.321947	0.301793	0.285826	0.279921	0.326282	0.293506	0.283416	0.299123	0.296608	0.42373	0.303025	0.419647	0.287987	0.320279
RIP	0.36439	0.390426	0.358091	0.354007	0.346656	0.267446	0.29124	0.220981	0.29806	0.402035	0.26924	0.322681	0.270867	0.300873	0.285947	0.357426	0.276015	0.375323	0.338573	0.357671	0.295002	0.283215	0.356403	0.365801	0.363199	0.3064	0.351586	0.360858	0.37089	0.362937	0.30558	0.301043	0.326395	0.363965	0.264522	0.373557	0.360576	0.337045	0.352733	0.270066	0.356783	0.353982	0.282687	0.266674	0.285835	0.262564	0.286089	0.350566	0.35821
Rochedane	0.359435	0.37932	0.371993	0.340421	0.34248	0.266282	0.281919	0.220871	0.287374	0.384987	0.265378	0.316745	0.307094	0.306098	0.283366	0.364689	0.300121	0.355168	0.342492	0.34441	0.270919	0.277284	0.357194	0.358024	0.3588	0.2732	0.344671	0.346006	0.366543	0.3687	0.308256	0.301676	0.316499	0.357704	0.274205	0.37254	0.356091	0.334877	0.329807	0.276514	0.34993	0.352783	0.288052	0.275915	0.303386	0.285521	0.301008	0.342032	0.358954
Romania_IronGates	0.333144	0.339438	0.317531	0.328151	0.324731	0.272699	0.273972	0.218831	0.302599	0.355672	0.262218	0.308633	0.272808	0.29158	0.275508	0.335839	0.279264	0.348774	0.308546	0.334289	0.276574	0.271496	0.337403	0.333801	0.331201	0.296244	0.331583	0.325026	0.334442	0.321589	0.306992	0.298248	0.31813	0.326195	0.261599	0.334508	0.333404	0.321481	0.330587	0.26477	0.333117	0.335947	0.273183	0.259793	0.276457	0.263003	0.277021	0.336844	0.324889
Romania_MaguraBuduiasca	0.328598	0.327537	0.320849	0.326238	0.321294	0.270545	0.273451	0.218613	0.304614	0.355461	0.26235	0.306761	0.279908	0.291635	0.278493	0.304069	0.284695	0.339877	0.307263	0.331461	0.277622	0.270377	0.329224	0.330383	0.324033	0.294752	0.325614	0.315955	0.326975	0.321627	0.3129	0.300648	0.318312	0.315522	0.26633	0.324448	0.327399	0.318571	0.324883	0.274675	0.327053	0.332621	0.271269	0.264132	0.281509	0.258666	0.283636	0.333598	0.324571
Russia_AfontovaGora2.SG	0.269266	0.273145	0.273352	0.274121	0.270049	0.255843	0.261018	0.225568	0.288891	0.344574	0.249105	0.241027	0.299862	0.261145	0.243575	0.238096	0.230034	0.263226	0.269633	0.275458	0.273992	0.253867	0.268808	0.270964	0.267687	0.27882	0.270781	0.274401	0.271926	0.272236	0.302703	0.300023	0.285	0.268012	0.248718	0.279198	0.272981	0.274431	0.279099	0.261812	0.27794	0.271775	0.258431	0.254738	0.259988	0.244438	0.236259	0.271914	0.275558
Russia_AfontovaGora3	0.256372	0.257974	0.250137	0.263879	0.263087	0.24087	0.25374	0.221287	0.294336	0.278846	0.244335	0.230619	0.260123	0.253473	0.288015	0.271486	0.280459	0.265127	0.25796	0.262584	0.256212	0.250154	0.267861	0.258501	0.256229	0.280376	0.258987	0.246595	0.258064	0.25035	0.295233	0.296471	0.279735	0.255423	0.25225	0.251735	0.25616	0.256224	0.252285	0.254743	0.259923	0.263113	0.252734	0.250086	0.246933	0.241699	0.250794	0.260045	0.251889
Russia_Karelia	0.285393	0.287534	0.277831	0.289633	0.289021	0.257632	0.262804	0.221321	0.31351	0.304909	0.25288	0.266986	0.26315	0.267858	0.261623	0.285653	0.264978	0.295835	0.277797	0.293329	0.260213	0.26097	0.297056	0.291868	0.288445	0.278568	0.291607	0.28123	0.287853	0.281772	0.315946	0.31104	0.306226	0.283558	0.258333	0.289564	0.289562	0.285587	0.285682	0.259887	0.292182	0.29336	0.262504	0.257043	0.26639	0.253318	0.264586	0.294899	0.280483
Russia_Kostenki12	0.260798	0.265007	0.270897	0.255252	0.269432	0.246301	0.288839	0.221187	0.24076	0.22589	0.26176	0.22343	0.238721	0.26217	0.150548	0.255391	0.315117	0.282609	0.268344	0.26222	0.296618	0.283227	0.256806	0.269867	0.26332	0.262644	0.260529	0.284869	0.264698	0.246711	0.254823	0.236881	0.252585	0.236406	0.261247	0.280713	0.256954	0.266096	0.257732	0.272209	0.262485	0.265218	0.272291	0.26031	0.267912	0.209464	0.240555	0.267808	0.246173
Russia_Kostenki14	0.259856	0.263566	0.265168	0.259513	0.261698	0.246303	0.274246	0.218472	0.252427	0.280264	0.263391	0.246282	0.264175	0.250374	0.249995	0.251602	0.274631	0.262786	0.265268	0.261125	0.268815	0.276162	0.263284	0.26292	0.258071	0.253223	0.260266	0.254711	0.262414	0.253615	0.254666	0.249212	0.254584	0.256815	0.268186	0.262072	0.257749	0.258031	0.255526	0.273188	0.260827	0.26069	0.265357	0.265182	0.260748	0.243009	0.263163	0.260382	0.263806
Russia_MA1.SG	0.257506	0.258476	0.249525	0.266556	0.263045	0.243019	0.257821	0.225127	0.279421	0.291388	0.250374	0.24656	0.274129	0.246521	0.239827	0.26454	0.250335	0.264007	0.25825	0.259525	0.264022	0.258245	0.265384	0.262259	0.262154	0.274259	0.263178	0.259756	0.258906	0.251438	0.284021	0.282612	0.274098	0.253068	0.258895	0.264284	0.259351	0.257459	0.249664	0.259739	0.261703	0.265505	0.261225	0.258797	0.257872	0.238113	0.254621	0.262745	0.244465
Russia_Popovo	0.284384	0.28509	0.275994	0.305545	0.29476	0.264214	0.262394	0.220446	0.322582	0.220896	0.258077	0.282827	0.276399	0.286331	0.255534	0.258534	0.301146	0.295546	0.27672	0.298039	0.240602	0.265317	0.287607	0.293803	0.288413	0.287533	0.286493	0.297568	0.2892	0.282906	0.31523	0.315694	0.305965	0.279427	0.265376	0.277389	0.290139	0.292162	0.271763	0.266673	0.296923	0.299306	0.274769	0.254793	0.280478	0.237657	0.262578	0.302123	0.297328
Russia_Samara	0.284149	0.288717	0.270626	0.282055	0.286351	0.254769	0.259459	0.218828	0.301879	0.287565	0.251239	0.26324	0.265662	0.264011	0.254353	0.269823	0.267005	0.289697	0.274827	0.292954	0.247521	0.254936	0.289642	0.284946	0.285225	0.253478	0.287755	0.287349	0.285332	0.269501	0.308257	0.30785	0.300382	0.269442	0.25333	0.286957	0.287616	0.284129	0.28415	0.256339	0.288582	0.287143	0.258063	0.253696	0.264507	0.250738	0.267115	0.290942	0.281012
Russia_Sidelkino.SG	0.286061	0.287757	0.280407	0.287722	0.287122	0.257704	0.256854	0.220847	0.314076	0.298458	0.253818	0.259979	0.25969	0.266758	0.277757	0.293728	0.264747	0.293256	0.279102	0.291885	0.254885	0.25754	0.298526	0.292298	0.287505	0.283047	0.289557	0.280293	0.287028	0.273037	0.309565	0.3074	0.303237	0.278984	0.258189	0.279532	0.288605	0.281524	0.290118	0.259258	0.291878	0.293743	0.264383	0.252472	0.263391	0.248829	0.262373	0.293327	0.282257
Russia_Sosnoviy	0.267864	0.268589	0.260125	0.27572	0.27272	0.246512	0.253956	0.221706	0.299371	0.278673	0.249481	0.246776	0.272962	0.258238	0.268741	0.257298	0.247631	0.278534	0.263621	0.275042	0.264644	0.254575	0.27293	0.273658	0.269851	0.265248	0.269674	0.265738	0.268137	0.26592	0.307316	0.292951	0.289571	0.256233	0.252314	0.274742	0.268451	0.270299	0.26874	0.252445	0.271222	0.276582	0.248288	0.254024	0.259778	0.253797	0.25352	0.276333	0.25911
Russia_Sunghir.SG	0.26321	0.267956	0.260849	0.263554	0.263839	0.24728	0.290216	0.2202	0.249001	0.275528	0.266596	0.242518	0.258627	0.253674	0.260019	0.260007	0.267512	0.269088	0.269078	0.261677	0.28828	0.290679	0.266407	0.264453	0.263173	0.248537	0.262652	0.260529	0.268021	0.256489	0.257645	0.251651	0.256891	0.261514	0.2679	0.266725	0.263998	0.259496	0.253177	0.266725	0.262078	0.263074	0.273476	0.267736	0.265376	0.23934	0.265393	0.262123	0.261782
Russia_Tyumen	0.263981	0.265244	0.25249	0.271263	0.270379	0.245263	0.259117	0.224574	0.295434	0.293325	0.249435	0.243243	0.250267	0.254004	0.252357	0.264193	0.262411	0.271043	0.265069	0.272514	0.257107	0.254302	0.273352	0.268915	0.266228	0.253535	0.269313	0.268464	0.266539	0.261788	0.301527	0.298892	0.288934	0.255655	0.256816	0.271168	0.268348	0.269238	0.264212	0.256847	0.269335	0.275622	0.25615	0.252733	0.258443	0.246097	0.253289	0.272677	0.263847
Russia_Ust_Ishim.DG	0.225406	0.223343	0.216289	0.227375	0.225299	0.218102	0.226931	0.223715	0.21974	0.239584	0.222327	0.207329	0.218009	0.219014	0.219087	0.221629	0.233809	0.225749	0.229602	0.223364	0.226337	0.228324	0.226835	0.225384	0.224637	0.2108	0.223342	0.223135	0.225856	0.216989	0.226635	0.223053	0.223113	0.22066	0.232509	0.226443	0.22089	0.225784	0.217191	0.231875	0.226654	0.223615	0.229649	0.231381	0.22584	0.207226	0.229326	0.222741	0.221318
Scotland_CnocCoig.SG	0.352534	0.351954	0.298052	0.330542	0.342928	0.26724	0.277638	0.223855	0.277688	0.417622	0.26793	0.289377	0.21783	0.295996	0.265813	0.369786	0.226999	0.326997	0.338125	0.343646	0.285097	0.279856	0.35398	0.351225	0.358577	0.196721	0.348039	0.324422	0.369563	0.357171	0.308393	0.269678	0.30833	0.396241	0.259962	0.358761	0.344697	0.33953	0.359738	0.264834	0.346873	0.353563	0.289827	0.257977	0.277317	0.199469	0.263294	0.333806	0.318031
Serbia_IronGates	0.341612	0.3469	0.332882	0.33503	0.332168	0.272564	0.278309	0.219978	0.300868	0.364127	0.264329	0.315692	0.280917	0.29641	0.279473	0.338274	0.276083	0.354141	0.316649	0.341657	0.279878	0.274598	0.343511	0.343413	0.339597	0.299655	0.338982	0.331837	0.342936	0.332603	0.310749	0.300247	0.323373	0.33352	0.265547	0.342341	0.342904	0.328148	0.337768	0.269082	0.340789	0.342599	0.276064	0.262977	0.283505	0.264376	0.28262	0.345397	0.330739
Spain_BalmaGuilanya	0.343398	0.355728	0.328038	0.335582	0.331588	0.262262	0.283911	0.222375	0.27944	0.366348	0.269698	0.306921	0.31476	0.29383	0.314759	0.339827	0.289981	0.328786	0.356184	0.328902	0.280706	0.280912	0.334779	0.338616	0.341025	0.286048	0.329272	0.33612	0.347907	0.334829	0.292451	0.287103	0.29981	0.336639	0.299246	0.353678	0.337545	0.321326	0.325835	0.298926	0.333863	0.329933	0.287832	0.289679	0.339429	0.262503	0.332326	0.318654	0.331236
Spain_Canes.SG	0.347736	0.350863	0.336237	0.367815	0.35616	0.266944	0.276088	0.220458	0.293369	0.36419	0.269328	0.309288	0.310454	0.298539	0.311658	0.346453	0.29064	0.339828	0.335182	0.33855	0.279526	0.276564	0.344612	0.343075	0.34372	0.312333	0.338036	0.338733	0.349835	0.336606	0.301648	0.293899	0.314136	0.341612	0.278077	0.345074	0.343579	0.324559	0.333773	0.280187	0.340221	0.337445	0.286004	0.27423	0.302077	0.260201	0.305329	0.332829	0.333837
Spain_CarihuelaCave	0.332515	0.339182	0.325896	0.334503	0.327677	0.262464	0.286601	0.225631	0.276568	0.344078	0.275548	0.293094	0.318749	0.282503	0.361895	0.335193	0.269965	0.328097	0.366748	0.318022	0.279899	0.282259	0.327536	0.328689	0.329816	0.299939	0.318935	0.318706	0.339548	0.33016	0.287309	0.281122	0.298044	0.32568	0.316037	0.335451	0.328204	0.314992	0.321367	0.320323	0.324446	0.322925	0.303145	0.306108	0.350863	0.260985	0.351993	0.31032	0.327303
Spain_Chan.SG	0.337197	0.343949	0.322483	0.335636	0.331387	0.259889	0.278065	0.220288	0.271972	0.363463	0.275002	0.294912	0.32402	0.290082	0.331987	0.335697	0.273074	0.321398	0.36603	0.321717	0.27583	0.278139	0.329607	0.333523	0.333487	0.294002	0.327102	0.327906	0.341532	0.332577	0.288433	0.274718	0.299172	0.337906	0.309266	0.342026	0.33456	0.316663	0.325962	0.317578	0.326715	0.322618	0.29758	0.296925	0.343978	0.268588	0.344459	0.311889	0.340858
Spain_CingleMasNou	0.332944	0.354781	0.31683	0.335189	0.333537	0.250147	0.28264	0.222973	0.236139	0.262571	0.278619	0.312617	0.283875	0.261458	0.317706	0.303353	0.255028	0.333825	0.376362	0.317766	0.273669	0.280606	0.305987	0.328535	0.336128	0.313985	0.335042	0.333113	0.349418	0.353391	0.29971	0.267452	0.306642	0.331456	0.304838	0.35207	0.347188	0.324989	0.317325	0.289953	0.323359	0.331698	0.292724	0.286341	0.329842	0.311351	0.326035	0.321778	0.344263
Spain_ElMiron	0.312204	0.320977	0.300873	0.311117	0.310137	0.257411	0.283464	0.222149	0.266881	0.311359	0.271562	0.289134	0.369119	0.2761	0.366773	0.307732	0.257463	0.304781	0.342226	0.304116	0.278585	0.278109	0.308071	0.311076	0.313947	0.277549	0.308344	0.307864	0.313512	0.311202	0.280267	0.274307	0.286906	0.312068	0.314431	0.323944	0.312422	0.300575	0.307323	0.325848	0.308334	0.307475	0.300011	0.299827	0.354661	0.279187	0.358904	0.297486	0.309593
Spain_LaBrana	0.346667	0.353341	0.333708	0.345159	0.339307	0.266575	0.281205	0.221319	0.284769	0.370589	0.272329	0.302058	0.307182	0.294514	0.311933	0.34916	0.287371	0.339245	0.348608	0.339415	0.28666	0.277392	0.338647	0.343745	0.340939	0.299289	0.337408	0.332296	0.350566	0.338601	0.302353	0.289583	0.312921	0.339188	0.291816	0.346642	0.342489	0.319796	0.335808	0.296821	0.337161	0.339431	0.290302	0.282787	0.314544	0.274864	0.314435	0.328161	0.34034
STO	0.370589	0.408252	0.354129	0.34893	0.34632	0.266082	0.291511	0.221965	0.291012	0.399371	0.274071	0.325344	0.286348	0.299292	0.288158	0.36426	0.280723	0.365446	0.35039	0.350614	0.292553	0.284969	0.361412	0.364105	0.363218	0.304363	0.353902	0.35948	0.373742	0.363339	0.30155	0.294266	0.316653	0.367544	0.269313	0.372211	0.364602	0.341365	0.34825	0.274111	0.357484	0.357118	0.286153	0.269811	0.294674	0.264849	0.294566	0.342964	0.367886
Sweden_Gotland.SG	0.319364	0.3194	0.310276	0.313098	0.314411	0.266448	0.271077	0.218675	0.3052	0.344465	0.259424	0.299153	0.279539	0.287606	0.273826	0.323991	0.269404	0.321896	0.302612	0.321963	0.270155	0.268271	0.332684	0.324024	0.319304	0.293114	0.320229	0.312674	0.321922	0.311223	0.309768	0.303434	0.315834	0.314368	0.261699	0.319006	0.32041	0.314583	0.315776	0.262186	0.323328	0.324201	0.2697	0.262373	0.279533	0.26381	0.279897	0.321178	0.312536
Sweden_Motala	0.323989	0.322595	0.31168	0.31785	0.317615	0.266916	0.272813	0.220207	0.309383	0.341543	0.261666	0.296971	0.276385	0.287933	0.278054	0.319214	0.275749	0.328953	0.304597	0.325089	0.276492	0.26938	0.329391	0.325654	0.321658	0.287082	0.324134	0.314193	0.32395	0.315042	0.314138	0.308994	0.321387	0.315631	0.265571	0.323167	0.324592	0.315872	0.319419	0.266343	0.327002	0.327572	0.271494	0.262637	0.281699	0.264459	0.279067	0.32414	0.311735
Switzerland_Bichon.SG	0.366371	0.386446	0.365923	0.35462	0.348133	0.266136	0.284868	0.219763	0.289649	0.389595	0.269526	0.323042	0.294812	0.3039	0.289082	0.36931	0.264177	0.360034	0.345103	0.352469	0.289026	0.279382	0.358666	0.362897	0.36534	0.299199	0.351739	0.35292	0.370737	0.357483	0.306523	0.296222	0.32191	0.367672	0.273498	0.368061	0.363393	0.338624	0.35633	0.276894	0.358249	0.356905	0.281693	0.268544	0.302864	0.263144	0.300094	0.342656	0.354511
TTK	0.255225	0.255668	0.228009	0.260051	0.258811	0.243253	0.251658	0.22396	0.287272	0.290945	0.241609	0.24276	0.249106	0.253592	0.236837	0.253689	0.260824	0.258333	0.257754	0.262343	0.258594	0.250233	0.265476	0.25645	0.257991	0.262369	0.256964	0.253202	0.257097	0.25182	0.285803	0.298849	0.274595	0.256842	0.251706	0.24532	0.258627	0.261401	0.263768	0.256431	0.262229	0.262285	0.267484	0.251094	0.251486	0.240838	0.248867	0.264471	0.254105
Ukraine_Dereivka1	0.310962	0.31107	0.293939	0.313127	0.309541	0.264828	0.272828	0.219095	0.311137	0.336501	0.258991	0.291772	0.268593	0.283357	0.26522	0.299647	0.261739	0.323077	0.291614	0.317104	0.271649	0.268026	0.315789	0.314646	0.309426	0.309931	0.314456	0.307778	0.31049	0.305107	0.31323	0.303747	0.316514	0.304367	0.261346	0.310576	0.315697	0.307911	0.311841	0.263298	0.314647	0.314274	0.263953	0.259898	0.276377	0.268145	0.278269	0.320072	0.30513
Ukraine_N	0.310677	0.311599	0.304913	0.311439	0.3099	0.266975	0.270147	0.220989	0.305282	0.332136	0.258294	0.292174	0.274044	0.286002	0.275366	0.31395	0.271379	0.321988	0.293979	0.316784	0.270552	0.267495	0.317424	0.313051	0.311453	0.292003	0.312909	0.304667	0.311658	0.304854	0.313712	0.302989	0.315517	0.305586	0.260314	0.315889	0.314241	0.307365	0.312346	0.263545	0.314685	0.315678	0.270021	0.259124	0.276004	0.259492	0.275245	0.3198	0.304421
Ukraine_Vasilevka	0.296819	0.298654	0.293724	0.300779	0.299912	0.26431	0.269262	0.22224	0.309653	0.310607	0.257635	0.280373	0.268205	0.277406	0.267657	0.298848	0.268839	0.309638	0.284892	0.304953	0.273359	0.264478	0.307423	0.301156	0.297882	0.284135	0.302118	0.294945	0.299864	0.289684	0.313603	0.306954	0.311693	0.295805	0.259654	0.302161	0.301254	0.296407	0.304699	0.262633	0.304358	0.305627	0.267187	0.258285	0.270096	0.258768	0.270417	0.308444	0.287969
VO	0.307469	0.308133	0.300223	0.307307	0.306359	0.265621	0.26801	0.219041	0.301784	0.330723	0.254926	0.284259	0.268924	0.278326	0.269887	0.297902	0.267437	0.3151	0.290614	0.311933	0.267962	0.264755	0.315239	0.311704	0.309135	0.291566	0.310318	0.300001	0.306994	0.303638	0.306166	0.303274	0.310587	0.30204	0.259264	0.314794	0.311098	0.303451	0.306619	0.262097	0.311838	0.313981	0.266916	0.25755	0.274169	0.259401	0.272534	0.314161	0.294446
Wales_Ogof	0.371331	0.379327	0.362707	0.351705	0.346351	0.266236	0.281142	0.218151	0.291007	0.398669	0.266541	0.324696	0.287867	0.305926	0.284142	0.393337	0.266851	0.359249	0.345821	0.3544	0.297748	0.280544	0.358085	0.368243	0.367613	0.29668	0.351817	0.36128	0.381688	0.367805	0.306655	0.292993	0.321472	0.370066	0.272805	0.382298	0.36528	0.341708	0.349616	0.281121	0.358072	0.36324	0.284051	0.271022	0.303138	0.267861	0.305649	0.345807	0.36594
WCX	0.368929	0.368355	0.387165	0.33168	0.343146	0.263924	0.273256	0.218503	0.288691	0.368122	0.264843	0.329479	0.303678	0.31114	0.292078	0.350679	0.294965	0.347368	0.329506	0.349179	0.278128	0.274964	0.355231	0.359176	0.358008	0.326909	0.351303	0.341847	0.366811	0.346085	0.298982	0.291773	0.319023	0.346959	0.276537	0.365331	0.360329	0.330548	0.351747	0.289606	0.354019	0.352197	0.277612	0.26208	0.290652	0.255926	0.297746	0.341182	0.354577
WOL	0.347119	0.354363	0.336007	0.343349	0.333995	0.269812	0.284771	0.218973	0.297126	0.396169	0.263386	0.322162	0.290633	0.292782	0.27528	0.355417	0.259641	0.35478	0.32553	0.346669	0.281772	0.274085	0.352019	0.347841	0.346197	0.29433	0.339306	0.332771	0.350274	0.344835	0.306702	0.295856	0.319	0.34618	0.268168	0.34711	0.347279	0.329512	0.347771	0.266987	0.345419	0.345392	0.280562	0.262684	0.287253	0.248436	0.286353	0.342305	0.339431
ZlatyKun	0.214327	0.217142	0.219087	0.211465	0.215804	0.216143	0.214626	0.2159	0.211824	0.222927	0.212354	0.197895	0.205096	0.210495	0.200419	0.227285	0.224049	0.221578	0.221318	0.215961	0.22164	0.217871	0.218926	0.215746	0.217414	0.194731	0.213908	0.2169	0.214304	0.213938	0.220215	0.215071	0.214154	0.214464	0.219615	0.209828	0.214286	0.216666	0.209813	0.223248	0.215494	0.216853	0.220201	0.220173	0.215392	0.204098	0.213586	0.21624	0.203389
[truncated: 90 more columns]

## Sheet: B.Gravettian_F4
Outgroup	Pop1	Pop2	Pop3	F4	Z	nBABA	nABBA	nSNPs
Mbuti.DG	GoyetQ116-1	Czech_Vestonice	Russia_Kostenki12	-0.002064	-1.425	1414	1474	29338
Mbuti.DG	GoyetQ116-1	Czech_Vestonice	Austria_KremsWA3	-0.00036	-0.427	5338	5380	116147
Mbuti.DG	GoyetQ116-1	Czech_Vestonice	Muierii1	-0.000269	-0.374	24236	24360	457715
Mbuti.DG	GoyetQ116-1	Czech_Vestonice	Italy_Ostuni1	8.2e-05	0.109	8434	8420	175066
Mbuti.DG	GoyetQ116-1	Czech_Vestonice	Paglicci133.pmd	0.000966	0.309	235	230	4927
Mbuti.DG	GoyetQ116-1	Czech_Vestonice	PA12	0.000235	0.344	17430	17347	351718
Mbuti.DG	GoyetQ116-1	Czech_Vestonice	Italy_Ostuni2	0.00134	0.545	450	438	9181
Mbuti.DG	GoyetQ116-1	Czech_Vestonice	Czech_Pavlov1	0.001342	0.966	1416	1376	30351
Mbuti.DG	GoyetQ116-1	Czech_Vestonice	GOY	0.003332	4.705	9818	9194	187479
Mbuti.DG	GoyetQ116-1	Czech_Vestonice	CIO	0.003689	1.415	442	412	8071
Mbuti.DG	GoyetQ116-1	Czech_Vestonice	GoyetQ376-3	0.008591	3.864	855	735	13969
Mbuti.DG	GoyetQ116-1	Czech_Vestonice	ORM	0.010774	12.219	11219	9140	192916
Mbuti.DG	GoyetQ116-1	Czech_Vestonice	GER_new	0.014908	15.155	6632	4965	111833
Mbuti.DG	GoyetQ116-1	Czech_Vestonice	FRL	0.015989	18.547	18377	13562	301170
Mbuti.DG	GoyetQ116-1	Czech_Vestonice	LRO	0.017822	4.824	265	191	4190
Mbuti.DG	Russia_Kostenki14	Czech_Vestonice	GoyetQ376-3	-0.006194	-3.463	1040	1162	19774
Mbuti.DG	Russia_Kostenki14	Czech_Vestonice	CIO	-0.002753	-1.164	566	596	10901
Mbuti.DG	Russia_Kostenki14	Czech_Vestonice	Paglicci133.pmd	-0.002572	-0.851	253	267	5399
Mbuti.DG	Russia_Kostenki14	Czech_Vestonice	GOY	-0.002206	-3.505	15124	15792	302454
Mbuti.DG	Russia_Kostenki14	Czech_Vestonice	FRL	-0.001797	-2.529	26236	27152	509636
Mbuti.DG	Russia_Kostenki14	Czech_Vestonice	Muierii1	-0.00159	-2.516	48889	50370	931623
Mbuti.DG	Russia_Kostenki14	Czech_Vestonice	Czech_Pavlov1	-0.001363	-1.252	2176	2240	47025
Mbuti.DG	Russia_Kostenki14	Czech_Vestonice	PA12	-0.001232	-1.955	29594	30339	604301
Mbuti.DG	Russia_Kostenki14	Czech_Vestonice	ORM	-0.001191	-1.716	18016	18430	347302
Mbuti.DG	Russia_Kostenki14	Czech_Vestonice	Italy_Ostuni1	-0.001111	-1.601	13498	13812	282845
Mbuti.DG	Russia_Kostenki14	Czech_Vestonice	GER_new	-0.000922	-1.16	8867	9028	174401
Mbuti.DG	Russia_Kostenki14	Czech_Vestonice	Austria_KremsWA3	-0.000461	-0.648	9114	9205	199109
Mbuti.DG	Russia_Kostenki14	Czech_Vestonice	Italy_Ostuni2	0.000291	0.14	689	685	14154
Mbuti.DG	Russia_Kostenki14	Czech_Vestonice	Russia_Kostenki12	0.00242	2.025	2594	2472	50395
Mbuti.DG	Russia_Kostenki14	Czech_Vestonice	LRO	0.004826	1.524	331	302	5938
Mbuti.DG	Russia_Sunghir.SG	Czech_Vestonice	GoyetQ376-3	-0.011557	-8.261	1037	1276	20733
Mbuti.DG	Russia_Sunghir.SG	Czech_Vestonice	CIO	-0.007356	-4.441	571	656	11465
Mbuti.DG	Russia_Sunghir.SG	Czech_Vestonice	FRL	-0.005298	-9.547	26624	29458	534740
Mbuti.DG	Russia_Sunghir.SG	Czech_Vestonice	GER_new	-0.005271	-8.863	8978	9950	184500
Mbuti.DG	Russia_Sunghir.SG	Czech_Vestonice	Muierii1	-0.005077	-10.166	49745	54683	972545
Mbuti.DG	Russia_Sunghir.SG	Czech_Vestonice	LRO	-0.005045	-2.175	317	348	6241
Mbuti.DG	Russia_Sunghir.SG	Czech_Vestonice	ORM	-0.004634	-8.485	18260	19940	362479
Mbuti.DG	Russia_Sunghir.SG	Czech_Vestonice	GOY	-0.004418	-9.641	15650	17055	318079
Mbuti.DG	Russia_Sunghir.SG	Czech_Vestonice	Italy_Ostuni2	-0.001966	-1.29	754	785	15681
Mbuti.DG	Russia_Sunghir.SG	Czech_Vestonice	PA12	-0.001432	-2.955	31170	32075	631988
Mbuti.DG	Russia_Sunghir.SG	Czech_Vestonice	Italy_Ostuni1	-0.000949	-1.807	14569	14856	302890
Mbuti.DG	Russia_Sunghir.SG	Czech_Vestonice	Czech_Pavlov1	-0.000593	-0.697	2416	2447	51891
Mbuti.DG	Russia_Sunghir.SG	Czech_Vestonice	Austria_KremsWA3	-0.000203	-0.372	9657	9699	207692
Mbuti.DG	Russia_Sunghir.SG	Czech_Vestonice	Paglicci133.pmd	-8.5e-05	-0.037	277	277	5638
Mbuti.DG	Russia_Sunghir.SG	Czech_Vestonice	Russia_Kostenki12	0.00368	4.201	2810	2612	53860
Mbuti.DG	GoyetQ116-1	FRL	CIO	-0.019703	-5.584	260	386	6357
Mbuti.DG	GoyetQ116-1	FRL	Russia_Kostenki12	-0.019185	-9.74	905	1307	20941
Mbuti.DG	GoyetQ116-1	FRL	Paglicci133.pmd	-0.017029	-4.402	156	225	4052
Mbuti.DG	GoyetQ116-1	FRL	Austria_KremsWA3	-0.016907	-13.258	3710	5104	82477
Mbuti.DG	GoyetQ116-1	FRL	Muierii1	-0.016511	-17.028	14134	19235	308974
Mbuti.DG	GoyetQ116-1	FRL	PA12	-0.016056	-16.376	11144	15192	252082
Mbuti.DG	GoyetQ116-1	FRL	Czech_Vestonice	-0.015989	-18.547	13562	18377	301170
Mbuti.DG	GoyetQ116-1	FRL	Italy_Ostuni1	-0.015272	-13.977	5596	7543	127491
Mbuti.DG	GoyetQ116-1	FRL	Czech_Pavlov1	-0.013858	-7.096	966	1277	22466
Mbuti.DG	GoyetQ116-1	FRL	Italy_Ostuni2	-0.013127	-3.985	296	384	6691
Mbuti.DG	GoyetQ116-1	FRL	GOY	-0.012816	-12.722	6039	7805	137805
Mbuti.DG	GoyetQ116-1	FRL	GoyetQ376-3	-0.005274	-1.803	569	626	10666
Mbuti.DG	GoyetQ116-1	FRL	ORM	-0.005122	-4.861	6035	6733	136246
Mbuti.DG	GoyetQ116-1	FRL	LRO	-0.002481	-0.537	144	152	3241
Mbuti.DG	GoyetQ116-1	FRL	GER_new	-0.002207	-2.023	3527	3712	83698
Mbuti.DG	Russia_Kostenki14	FRL	GoyetQ376-3	-0.003657	-1.492	708	758	13695
Mbuti.DG	Russia_Kostenki14	FRL	CIO	-0.000966	-0.332	375	382	7811
Mbuti.DG	Russia_Kostenki14	FRL	GER_new	-0.000486	-0.52	4905	4962	117198
Mbuti.DG	Russia_Kostenki14	FRL	Italy_Ostuni2	-0.000222	-0.079	462	464	9197
Mbuti.DG	Russia_Kostenki14	FRL	Czech_Pavlov1	-0.000166	-0.1	1524	1529	30639
Mbuti.DG	Russia_Kostenki14	FRL	GOY	0.000417	0.513	9852	9769	198422
Mbuti.DG	Russia_Kostenki14	FRL	Muierii1	0.000448	0.553	28740	28499	539470
Mbuti.DG	Russia_Kostenki14	FRL	PA12	0.000547	0.684	19931	19720	385839
Mbuti.DG	Russia_Kostenki14	FRL	LRO	0.000676	0.173	179	176	4131
Mbuti.DG	Russia_Kostenki14	FRL	ORM	0.001247	1.564	9928	9659	216111
Mbuti.DG	Russia_Kostenki14	FRL	Paglicci133.pmd	0.0013	0.314	210	204	4328
Mbuti.DG	Russia_Kostenki14	FRL	Italy_Ostuni1	0.00145	1.594	9415	9149	183292
Mbuti.DG	Russia_Kostenki14	FRL	Austria_KremsWA3	0.001659	1.571	6642	6433	126016
Mbuti.DG	Russia_Kostenki14	FRL	Czech_Vestonice	0.001797	2.529	27152	26236	509636
Mbuti.DG	Russia_Kostenki14	FRL	Russia_Kostenki12	0.002729	1.645	1703	1618	31450
Mbuti.DG	Russia_Sunghir.SG	FRL	GoyetQ376-3	-0.00696	-3.915	706	807	14548
Mbuti.DG	Russia_Sunghir.SG	FRL	CIO	-0.003446	-1.571	399	428	8307
Mbuti.DG	Russia_Sunghir.SG	FRL	GER_new	-0.000723	-1.085	5221	5312	125878
Mbuti.DG	Russia_Sunghir.SG	FRL	Muierii1	0.000593	0.979	30469	30131	569496
Mbuti.DG	Russia_Sunghir.SG	FRL	ORM	0.000698	1.138	10408	10249	228439
Mbuti.DG	Russia_Sunghir.SG	FRL	GOY	0.001158	1.916	10590	10345	211604
Mbuti.DG	Russia_Sunghir.SG	FRL	LRO	0.001409	0.51	187	181	4407
Mbuti.DG	Russia_Sunghir.SG	FRL	Italy_Ostuni2	0.001601	0.807	524	507	10491
Mbuti.DG	Russia_Sunghir.SG	FRL	Paglicci133.pmd	0.002034	0.646	228	218	4547
Mbuti.DG	Russia_Sunghir.SG	FRL	Czech_Pavlov1	0.003171	2.67	1788	1678	34795
Mbuti.DG	Russia_Sunghir.SG	FRL	PA12	0.003584	5.792	21801	20337	408495
Mbuti.DG	Russia_Sunghir.SG	FRL	Italy_Ostuni1	0.004512	6.866	10591	9687	200380
Mbuti.DG	Russia_Sunghir.SG	FRL	Austria_KremsWA3	0.005101	6.554	7291	6611	133254
Mbuti.DG	Russia_Sunghir.SG	FRL	Czech_Vestonice	0.005298	9.547	29458	26624	534740
Mbuti.DG	Russia_Sunghir.SG	FRL	Russia_Kostenki12	0.007742	6.486	1905	1638	34380
Mbuti.DG	GoyetQ116-1	Czech_Vestonice	BK-1653	0.001206	1.647	22824	22300	434545
Mbuti.DG	Russia_Kostenki14	Czech_Vestonice	BK-1653	-0.002899	-4.426	41490	43873	821684
Mbuti.DG	Russia_Sunghir.SG	Czech_Vestonice	BK-1653	-0.005573	-10.497	42269	47022	852828
Mbuti.DG	GoyetQ116-1	FRL	BK-1653	-0.01478	-15.46	13539	17939	297706
Mbuti.DG	Russia_Kostenki14	FRL	BK-1653	-0.000613	-0.764	25310	25612	492681
Mbuti.DG	Russia_Sunghir.SG	FRL	BK-1653	-0.000205	-0.318	26774	26880	517475
Outgroup	Pop1	Pop2	Pop3	F4	Z	nBABA	nABBA	nSNPs	Group
Mbuti.DG	GoyetQ376-3	GoyetQ116-1	Sunghir.SG	-0.016779	-8.66	633	873	14313	pre-Gravettian
Mbuti.DG	LRO	GoyetQ116-1	Sunghir.SG	-0.017184	-5.117	186	260	4268	Western
Mbuti.DG	FRL	GoyetQ116-1	Sunghir.SG	-0.016679	-19.84	14229	19396	309763	Western
Mbuti.DG	GER_new	GoyetQ116-1	Sunghir.SG	-0.015397	-16.187	5156	6915	114238	Western
Mbuti.DG	ORM	GoyetQ116-1	Sunghir.SG	-0.011464	-12.111	9710	11977	197765	Central
Mbuti.DG	GOY	GoyetQ116-1	Sunghir.SG	-0.003016	-4.018	9895	10473	191882	Central
Mbuti.DG	BK-1653	GoyetQ116-1	Sunghir.SG	-0.002279	-3.227	23635	24663	450901	pre-Gravettian
Mbuti.DG	CIO	GoyetQ116-1	Sunghir.SG	-0.000774	-0.312	427	433	8246	pre-Gravettian
Mbuti.DG	Muierii1	GoyetQ116-1	Sunghir.SG	-0.000146	-0.215	25850	25920	479511	pre-Gravettian
Mbuti.DG	Italy_Ostuni2	GoyetQ116-1	Sunghir.SG	0.002281	0.953	488	467	9235	Southern
Mbuti.DG	PA12	GoyetQ116-1	Sunghir.SG	0.002949	3.974	20089	19017	363816	Southern
Mbuti.DG	Czech_Pavlov1	GoyetQ116-1	Sunghir.SG	0.003145	2.224	1616	1520	30579	Eastern
Mbuti.DG	Italy_Ostuni1	GoyetQ116-1	Sunghir.SG	0.003597	4.479	9663	9027	176853	Southern
Mbuti.DG	Austria_KremsWA3	GoyetQ116-1	Sunghir.SG	0.003798	4.095	6630	6181	118230	Eastern
Mbuti.DG	Russia_Kostenki14	GoyetQ116-1	Russia_Sunghir.SG	0.004039	5.654	25691	23840	458298	pre-Gravettian
Mbuti.DG	Czech_Vestonice	GoyetQ116-1	Sunghir.SG	0.004347	7.269	25842	23847	458920	Eastern
Mbuti.DG	Paglicci133.pmd	GoyetQ116-1	Sunghir.SG	0.005816	1.854	278	248	5090	Southern
Mbuti.DG	Russia_Kostenki12	GoyetQ116-1	Sunghir.SG	0.009664	6.772	1695	1407	29776	pre-Gravettian
Mbuti.DG	Russia_Sunghir.SG	GoyetQ116-1	GoyetQ376-3	-0.008783	-5.34	633	758	14313	pre-Gravettian
Mbuti.DG	Russia_Sunghir.SG	GoyetQ116-1	LRO	-0.002314	-0.816	186	196	4268	Western
Mbuti.DG	Russia_Sunghir.SG	GoyetQ116-1	CIO	-0.002062	-0.887	427	444	8246	pre-Gravettian
Mbuti.DG	Russia_Sunghir.SG	GoyetQ116-1	GER_new	-0.000355	-0.474	5156	5197	114238	Western
Mbuti.DG	Russia_Sunghir.SG	GoyetQ116-1	BK-1653	-0.0003	-0.46	23635	23771	450901	pre-Gravettian
Mbuti.DG	Russia_Sunghir.SG	GoyetQ116-1	FRL	0.000192	0.326	14229	14170	309763	Western
Mbuti.DG	Russia_Sunghir.SG	GoyetQ116-1	Muierii1	0.000561	0.911	25850	25581	479511	pre-Gravettian
Mbuti.DG	Russia_Sunghir.SG	GoyetQ116-1	ORM	0.000636	0.949	9710	9584	197765	Central
Mbuti.DG	Russia_Sunghir.SG	GoyetQ116-1	GOY	0.000754	1.152	9895	9750	191882	Central
Mbuti.DG	Russia_Sunghir.SG	GoyetQ116-1	Paglicci133.pmd	0.002988	0.998	278	262	5090	Southern
Mbuti.DG	Russia_Sunghir.SG	GoyetQ116-1	Russia_Kostenki14	0.003322	5.145	25691	24168	458298	pre-Gravettian
Mbuti.DG	Russia_Sunghir.SG	GoyetQ116-1	Italy_Ostuni2	0.003582	1.691	488	455	9235	Southern
Mbuti.DG	Russia_Sunghir.SG	GoyetQ116-1	PA12	0.00402	6.213	20089	18627	363816	Southern
Mbuti.DG	Russia_Sunghir.SG	GoyetQ116-1	Czech_Pavlov1	0.004404	3.489	1616	1482	30579	Eastern
Mbuti.DG	Russia_Sunghir.SG	GoyetQ116-1	Italy_Ostuni1	0.004589	6.422	9663	8851	176853	southern
Mbuti.DG	Russia_Sunghir.SG	GoyetQ116-1	Austria_KremsWA3	0.005126	6.218	6630	6024	118230	Eastern
Mbuti.DG	Russia_Sunghir.SG	GoyetQ116-1	Czech_Vestonice	0.005321	8.987	25842	23400	458920	Eastern
Mbuti.DG	Russia_Sunghir.SG	GoyetQ116-1	Russia_Kostenki12	0.009037	7.242	1695	1425	29776	pre-Gravettian
Mbuti.DG	GoyetQ116-1	Russia_Sunghir.SG	Paglicci133.pmd	-0.002828	-0.96	248	262	5090	Southern
Mbuti.DG	GoyetQ116-1	Russia_Sunghir.SG	CIO	-0.001288	-0.515	433	444	8246	pre-Gravettian
Mbuti.DG	GoyetQ116-1	Russia_Sunghir.SG	Russia_Kostenki14	-0.000717	-1.007	23840	24168	458298	pre-Gravettian
Mbuti.DG	GoyetQ116-1	Russia_Sunghir.SG	Russia_Kostenki12	-0.000627	-0.494	1407	1425	29776	pre-Gravettian
Mbuti.DG	GoyetQ116-1	Russia_Sunghir.SG	Muierii1	0.000707	1.017	25920	25581	479511	pre-Gravettian
Mbuti.DG	GoyetQ116-1	Russia_Sunghir.SG	Czech_Vestonice	0.000974	1.842	23847	23400	458920	Eastern
Mbuti.DG	GoyetQ116-1	Russia_Sunghir.SG	Italy_Ostuni1	0.000992	1.333	9027	8851	176853	Eastern
Mbuti.DG	GoyetQ116-1	Russia_Sunghir.SG	PA12	0.001071	1.603	19017	18627	363816	Eastern
Mbuti.DG	GoyetQ116-1	Russia_Sunghir.SG	Czech_Pavlov1	0.001259	0.91	1520	1482	30579	Eastern
Mbuti.DG	GoyetQ116-1	Russia_Sunghir.SG	Italy_Ostuni2	0.001302	0.565	467	455	9235	Eastern
Mbuti.DG	GoyetQ116-1	Russia_Sunghir.SG	Austria_KremsWA3	0.001328	1.536	6181	6024	118230	Eastern
Mbuti.DG	GoyetQ116-1	Russia_Sunghir.SG	BK-1653	0.001979	2.684	24663	23771	450901	pre-Gravettian
Mbuti.DG	GoyetQ116-1	Russia_Sunghir.SG	GOY	0.00377	5.308	10473	9750	191882	Central
Mbuti.DG	GoyetQ116-1	Russia_Sunghir.SG	GoyetQ376-3	0.007996	4.025	873	758	14313	pre-Gravettian
Mbuti.DG	GoyetQ116-1	Russia_Sunghir.SG	ORM	0.0121	13.575	11977	9584	197765	Western
Mbuti.DG	GoyetQ116-1	Russia_Sunghir.SG	LRO	0.01487	4.264	260	196	4268	Western
Mbuti.DG	GoyetQ116-1	Russia_Sunghir.SG	GER_new	0.015041	15.827	6915	5197	114238	Western
Mbuti.DG	GoyetQ116-1	Russia_Sunghir.SG	FRL	0.016871	20.096	19396	14170	309763	Western
Mbuti.DG	Czech_Vestonice	FRL	CIO	-0.006598	-2.818	379	433	8116	pre-Gravettian
Mbuti.DG	Czech_Vestonice	FRL	LRO	-0.003741	-1.241	175	192	4313	Western
Mbuti.DG	Czech_Vestonice	FRL	Muierii1	-0.000582	-0.869	28193	28503	533430	pre-Gravettian
Mbuti.DG	Czech_Vestonice	FRL	GER_new	-0.000138	-0.201	5119	5136	122600	Western
Mbuti.DG	Czech_Vestonice	FRL	ORM	0.001156	1.769	10190	9934	221292	Central
Mbuti.DG	Czech_Vestonice	FRL	GOY	0.002248	3.322	10440	9978	205750	Central
Mbuti.DG	Czech_Vestonice	FRL	Italy_Ostuni2	0.003127	1.487	526	493	10392	Southern
Mbuti.DG	Czech_Vestonice	FRL	Paglicci133.pmd	0.003849	1.165	224	207	4406	Southern
Mbuti.DG	Czech_Vestonice	FRL	PA12	0.006632	9.548	21638	19040	391688	Southern
Mbuti.DG	Czech_Vestonice	FRL	Italy_Ostuni1	0.007403	10.113	10901	9435	197999	Southern
Mbuti.DG	Czech_Vestonice	FRL	Czech_Pavlov1	0.010589	7.986	1924	1559	34474	Eastern
Mbuti.DG	Czech_Vestonice	FRL	Austria_KremsWA3	0.01532	16.478	7989	5991	130406	Eastern
Mbuti.DG	FRL	Czech_Vestonice	CIO	-0.002247	-0.859	414	433	8116	pre-Gravettian
Mbuti.DG	FRL	Czech_Vestonice	Muierii1	-0.00164	-2.497	27628	28503	533430	pre-Gravettian
Mbuti.DG	FRL	Czech_Vestonice	Austria_KremsWA3	-0.000565	-0.745	5918	5991	130406	Eastern
Mbuti.DG	FRL	Czech_Vestonice	Italy_Ostuni1	-3.4e-05	-0.046	9428	9435	197999	Southern
Mbuti.DG	FRL	Czech_Vestonice	Italy_Ostuni2	-2.9e-05	-0.014	493	493	10392	Southern
Mbuti.DG	FRL	Czech_Vestonice	PA12	0.000667	0.997	19301	19040	391688	Southern
Mbuti.DG	FRL	Czech_Vestonice	Czech_Pavlov1	0.001112	0.882	1597	1559	34474	Eastern
Mbuti.DG	FRL	Czech_Vestonice	Paglicci133.pmd	0.001268	0.38	213	207	4406	Southern
Mbuti.DG	FRL	Czech_Vestonice	GOY	0.004509	6.359	10905	9978	205750	Central
Mbuti.DG	FRL	Czech_Vestonice	ORM	0.016133	17.744	13504	9934	221292	Central
Mbuti.DG	FRL	Czech_Vestonice	LRO	0.016913	4.501	264	192	4313	Western
Mbuti.DG	FRL	Czech_Vestonice	GER_new	0.01943	20.877	7518	5136	122600	Western
Mbuti.DG	LRO	GoyetQ116-1	BK-1653	-0.017456	-4.284	172	244	4158	Western
Mbuti.DG	GoyetQ376-3	GoyetQ116-1	BK-1653	-0.014627	-6.1	598	801	13927	pre-Gravettian
Mbuti.DG	FRL	GoyetQ116-1	BK-1653	-0.014168	-14.617	13722	17939	297706	Western
Mbuti.DG	GER_new	GoyetQ116-1	BK-1653	-0.012706	-11.532	5023	6429	110625	Western
Mbuti.DG	ORM	GoyetQ116-1	BK-1653	-0.011508	-11.078	9024	11200	189026	Central
Mbuti.DG	GOY	GoyetQ116-1	BK-1653	-0.001385	-1.603	9477	9734	185550	Central
Mbuti.DG	Italy_Ostuni2	GoyetQ116-1	BK-1653	-0.001052	-0.362	453	462	9067	Southern
Mbuti.DG	Russia_Kostenki12	GoyetQ116-1	BK-1653	0.000526	0.303	1464	1449	28828	pre-Gravettian
Mbuti.DG	Muierii1	GoyetQ116-1	BK-1653	0.002235	2.61	24335	23330	449736	pre-Gravettian
Mbuti.DG	Czech_Pavlov1	GoyetQ116-1	BK-1653	0.002395	1.411	1579	1507	29936	Eastern
Mbuti.DG	Austria_KremsWA3	GoyetQ116-1	BK-1653	0.002453	2.107	6210	5931	113683	Eastern
Mbuti.DG	Czech_Vestonice	GoyetQ116-1	BK-1653	0.002811	3.952	23522	22300	434545	Eastern
Mbuti.DG	Italy_Ostuni1	GoyetQ116-1	BK-1653	0.003067	3.198	9178	8650	172345	Southern
Mbuti.DG	PA12	GoyetQ116-1	BK-1653	0.003676	4.332	19012	17728	349176	Southern
Mbuti.DG	CIO	GoyetQ116-1	BK-1653	0.004158	1.391	443	409	8047	pre-Gravettian
Mbuti.DG	Paglicci133.pmd	GoyetQ116-1	BK-1653	0.008465	2.175	275	233	5001	Southern
Mbuti.DG	FRL	Russia_Sunghir.SG	Czech_Vestonice	0.0024	4.763	27908	26624	534740
Mbuti.DG	FRL	Russia_Sunghir.SG	Austria_KremsWA3	0.002763	3.549	6979	6611	133254
Mbuti.DG	FRL	Russia_Sunghir.SG	CIO	0.00201	0.806	445	428	8307
Mbuti.DG	FRL	Russia_Sunghir.SG	Czech_Pavlov1	0.001734	1.356	1738	1678	34795
Mbuti.DG	FRL	Russia_Sunghir.SG	GER_new	0.020976	22.843	7952	5312	125878
Mbuti.DG	FRL	Russia_Sunghir.SG	GOY	0.006868	10.038	11799	10345	211604
Mbuti.DG	FRL	Russia_Sunghir.SG	Italy_Ostuni1	0.002202	3.057	10128	9687	200380
Mbuti.DG	FRL	Russia_Sunghir.SG	Italy_Ostuni2	0.001566	0.769	523	507	10491
Mbuti.DG	FRL	Russia_Sunghir.SG	LRO	0.019632	5.99	268	181	4407
Mbuti.DG	FRL	Russia_Sunghir.SG	ORM	0.018755	21.28	14533	10249	228439
Mbuti.DG	FRL	Russia_Sunghir.SG	PA12	0.003021	4.729	21571	20337	408495
Mbuti.DG	FRL	Russia_Sunghir.SG	Paglicci133.pmd	0.003462	1.067	234	218	4547
Mbuti.DG	FRL	Russia_Sunghir.SG	Muierii1	0.000669	1.07	30513	30131	569496
Mbuti.DG	Czech_Vestonice	GoyetQ116-1	FRL	0.001765	2.806	14093	13562	301170
Mbuti.DG	Austria_KremsWA3	GoyetQ116-1	FRL	0.001228	1.138	3811	3710	82477
Mbuti.DG	CIO	GoyetQ116-1	FRL	0.00544	1.727	295	260	6357
Mbuti.DG	Czech_Pavlov1	GoyetQ116-1	FRL	0.002196	1.275	1015	966	22466
Mbuti.DG	GER_new	GoyetQ116-1	FRL	0.007593	6.788	4162	3527	83698
Mbuti.DG	GOY	GoyetQ116-1	FRL	0.002956	3.431	6446	6039	137805
Mbuti.DG	Italy_Ostuni1	GoyetQ116-1	FRL	0.001654	1.696	5806	5596	127491
Mbuti.DG	Italy_Ostuni2	GoyetQ116-1	FRL	-0.000529	-0.17	293	296	6691
Mbuti.DG	LRO	GoyetQ116-1	FRL	3.9e-05	0.009	144	144	3241
Mbuti.DG	ORM	GoyetQ116-1	FRL	0.006983	6.651	6987	6035	136246
Mbuti.DG	PA12	GoyetQ116-1	FRL	0.002876	3.471	11869	11144	252082
Mbuti.DG	Paglicci133.pmd	GoyetQ116-1	FRL	0.006951	1.738	184	156	4052
Mbuti.DG	Muierii1	GoyetQ116-1	FRL	0.000401	0.544	14258	14134	308974

## Sheet: C.ZlatyKun_F4
Outgroup	ZlatyKun	Test1	Test2	F4	Z-score	nBABA	nABBA	nSNPs
Mbuti.DG	ZlatyKun	Austria_KremsWA3	BachoKiro_IUP	0.000566	0.644	8562	8475	153774
Mbuti.DG	ZlatyKun	Austria_KremsWA3	BK-1653	-0.000253	-0.273	7282	7319	146571
Mbuti.DG	ZlatyKun	Austria_KremsWA3	China_Tianyuan	0.00203	2.074	8169	7872	146339
Mbuti.DG	ZlatyKun	Austria_KremsWA3	CIO	-0.0058	-1.073	116	131	2464
Mbuti.DG	ZlatyKun	Austria_KremsWA3	Czech_Pavlov1	0.00011	0.047	516	515	11716
Mbuti.DG	ZlatyKun	Austria_KremsWA3	Czech_Vestonice	0.000746	1.134	6706	6593	152187
Mbuti.DG	ZlatyKun	Austria_KremsWA3	FRL	0.001562	1.507	5152	4991	102713
Mbuti.DG	ZlatyKun	Austria_KremsWA3	GER_new	0.003473	2.365	1912	1777	38676
Mbuti.DG	ZlatyKun	Austria_KremsWA3	GOY	0.000565	0.503	3147	3111	63705
Mbuti.DG	ZlatyKun	Austria_KremsWA3	GoyetQ116-1	0.001378	1.311	4767	4641	91879
Mbuti.DG	ZlatyKun	Austria_KremsWA3	GoyetQ376-3	-0.00224	-0.555	223	233	4352
Mbuti.DG	ZlatyKun	Austria_KremsWA3	Italy_Ostuni1	0.001737	1.529	3207	3089	68066
Mbuti.DG	ZlatyKun	Austria_KremsWA3	LRO	-0.005183	-0.732	68	75	1415
Mbuti.DG	ZlatyKun	Austria_KremsWA3	ORM	0.001366	1.2	3609	3512	71276
Mbuti.DG	ZlatyKun	Austria_KremsWA3	Oase1	-0.003441	-1.763	1100	1172	21083
Mbuti.DG	ZlatyKun	Austria_KremsWA3	PA12	-0.000297	-0.334	5404	5438	115648
Mbuti.DG	ZlatyKun	Austria_KremsWA3	Paglicci133	-0.000636	-0.14	195	197	3734
Mbuti.DG	ZlatyKun	Austria_KremsWA3	Muierii1	0.000452	0.524	7969	7900	154505
Mbuti.DG	ZlatyKun	Austria_KremsWA3	Russia_Kostenki12	0.002038	0.821	547	524	10938
Mbuti.DG	ZlatyKun	Austria_KremsWA3	Russia_Kostenki14	0.00111	1.181	7570	7406	147400
Mbuti.DG	ZlatyKun	Austria_KremsWA3	Russia_Sunghir.SG	0.000252	0.354	7610	7571	154981
Mbuti.DG	ZlatyKun	Austria_KremsWA3	Russia_Ust_Ishim.DG	0.000791	0.826	8130	8013	147403
Mbuti.DG	ZlatyKun	Austria_KremsWA3	Russia_Yana.SG	0.00049	0.608	8159	8083	154972
Mbuti.DG	ZlatyKun	BachoKiro_IUP	BK-1653	-0.000737	-1.055	31230	31656	577976
Mbuti.DG	ZlatyKun	BachoKiro_IUP	China_Tianyuan	0.000836	1.151	30525	30052	564822
Mbuti.DG	ZlatyKun	BachoKiro_IUP	CIO	0.000628	0.25	464	458	8635
Mbuti.DG	ZlatyKun	BachoKiro_IUP	Czech_Pavlov1	-0.001034	-0.812	2107	2149	40464
Mbuti.DG	ZlatyKun	BachoKiro_IUP	Czech_Vestonice	0.000454	0.724	33141	32868	601753
Mbuti.DG	ZlatyKun	BachoKiro_IUP	FRL	0.000577	0.827	20491	20270	382827
Mbuti.DG	ZlatyKun	BachoKiro_IUP	GER_new	0.002033	2.34	7292	7013	137207
Mbuti.DG	ZlatyKun	BachoKiro_IUP	GOY	-0.000145	-0.193	12539	12572	232326
Mbuti.DG	ZlatyKun	BachoKiro_IUP	GoyetQ116-1	0.00119	1.543	18425	18026	335317
Mbuti.DG	ZlatyKun	BachoKiro_IUP	GoyetQ376-3	-0.002006	-1.026	808	838	15111
Mbuti.DG	ZlatyKun	BachoKiro_IUP	Italy_Ostuni1	0.000991	1.258	12540	12309	233120
Mbuti.DG	ZlatyKun	BachoKiro_IUP	LRO	-0.001919	-0.55	235	244	4735
Mbuti.DG	ZlatyKun	BachoKiro_IUP	ORM	-0.000105	-0.135	14226	14253	261423
Mbuti.DG	ZlatyKun	BachoKiro_IUP	Oase1	-0.002066	-1.969	3684	3836	73758
Mbuti.DG	ZlatyKun	BachoKiro_IUP	PA12	5e-06	0.007	23968	23966	442343
Mbuti.DG	ZlatyKun	BachoKiro_IUP	Paglicci133	-0.003792	-1.723	739	791	13780
Mbuti.DG	ZlatyKun	BachoKiro_IUP	Muierii1	-0.000294	-0.444	34391	34575	626046
Mbuti.DG	ZlatyKun	BachoKiro_IUP	Russia_Kostenki12	0.000824	0.612	2103	2071	39194
Mbuti.DG	ZlatyKun	BachoKiro_IUP	Russia_Kostenki14	0.000369	0.488	33458	33236	601311
Mbuti.DG	ZlatyKun	BachoKiro_IUP	Russia_Sunghir.SG	-0.000107	-0.179	34506	34573	627743
Mbuti.DG	ZlatyKun	BachoKiro_IUP	Russia_Ust_Ishim.DG	0.000356	0.479	32344	32133	593233
Mbuti.DG	ZlatyKun	BachoKiro_IUP	Russia_Yana.SG	0.000342	0.581	34419	34204	627729
Mbuti.DG	ZlatyKun	BK-1653	China_Tianyuan	0.001817	2.253	29604	28632	534939
Mbuti.DG	ZlatyKun	BK-1653	CIO	-0.001886	-0.666	397	412	8351
Mbuti.DG	ZlatyKun	BK-1653	Czech_Pavlov1	0.001438	1.038	1916	1860	39387
Mbuti.DG	ZlatyKun	BK-1653	Czech_Vestonice	0.001166	1.935	28143	27485	564310
Mbuti.DG	ZlatyKun	BK-1653	FRL	0.001487	2.07	18160	17617	365182
Mbuti.DG	ZlatyKun	BK-1653	GER_new	0.002698	2.949	6485	6129	131780
Mbuti.DG	ZlatyKun	BK-1653	GOY	0.000971	1.302	11077	10861	223002
Mbuti.DG	ZlatyKun	BK-1653	GoyetQ116-1	0.001852	2.368	16455	15856	323447
Mbuti.DG	ZlatyKun	BK-1653	GoyetQ376-3	-0.003507	-1.541	729	780	14601
Mbuti.DG	ZlatyKun	BK-1653	Italy_Ostuni1	0.001735	2.24	11009	10618	225470
Mbuti.DG	ZlatyKun	BK-1653	LRO	0.002842	0.753	220	207	4574
Mbuti.DG	ZlatyKun	BK-1653	ORM	0.001718	2.161	12718	12293	247589
Mbuti.DG	ZlatyKun	BK-1653	Oase1	-0.00222	-1.781	3798	3956	71426
Mbuti.DG	ZlatyKun	BK-1653	PA12	0.000904	1.287	20607	20227	421452
Mbuti.DG	ZlatyKun	BK-1653	Paglicci133	-0.004387	-1.819	640	699	13449
Mbuti.DG	ZlatyKun	BK-1653	Muierii1	0.000416	0.635	29106	28864	582579
Mbuti.DG	ZlatyKun	BK-1653	Russia_Kostenki12	0.001053	0.693	1873	1833	37660
Mbuti.DG	ZlatyKun	BK-1653	Russia_Kostenki14	0.001167	1.523	29009	28356	559163
Mbuti.DG	ZlatyKun	BK-1653	Russia_Sunghir.SG	0.000633	1.052	29904	29534	584175
Mbuti.DG	ZlatyKun	BK-1653	Russia_Ust_Ishim.DG	0.001092	1.323	30450	29846	553077
Mbuti.DG	ZlatyKun	BK-1653	Russia_Yana.SG	0.001111	1.703	30866	30217	584164
Mbuti.DG	ZlatyKun	China_Tianyuan	CIO	0.000177	0.06	446	445	8236
Mbuti.DG	ZlatyKun	China_Tianyuan	Czech_Pavlov1	-0.000934	-0.61	2119	2156	39557
Mbuti.DG	ZlatyKun	China_Tianyuan	Czech_Vestonice	-0.000405	-0.578	30189	30414	555022
Mbuti.DG	ZlatyKun	China_Tianyuan	FRL	-0.000288	-0.344	18914	19017	357761
Mbuti.DG	ZlatyKun	China_Tianyuan	GER_new	0.0001	0.096	6758	6745	129836
Mbuti.DG	ZlatyKun	China_Tianyuan	GOY	-0.000936	-1.118	11799	12004	219143
Mbuti.DG	ZlatyKun	China_Tianyuan	GoyetQ116-1	1.5e-05	0.018	17080	17075	317801
Mbuti.DG	ZlatyKun	China_Tianyuan	GoyetQ376-3	-0.001577	-0.667	752	775	14319
Mbuti.DG	ZlatyKun	China_Tianyuan	Italy_Ostuni1	0.000464	0.527	12084	11978	226811
Mbuti.DG	ZlatyKun	China_Tianyuan	LRO	-0.003065	-0.75	241	255	4541
Mbuti.DG	ZlatyKun	China_Tianyuan	ORM	-0.000501	-0.557	13245	13368	245348
Mbuti.DG	ZlatyKun	China_Tianyuan	Oase1	-0.004012	-3.217	3597	3881	70730
Mbuti.DG	ZlatyKun	China_Tianyuan	PA12	-0.000832	-1.063	21997	22339	410799
Mbuti.DG	ZlatyKun	China_Tianyuan	Paglicci133	-0.007876	-3.167	647	749	12988
Mbuti.DG	ZlatyKun	China_Tianyuan	Muierii1	-0.001328	-1.72	30632	31388	568962
Mbuti.DG	ZlatyKun	China_Tianyuan	Russia_Kostenki12	-0.001223	-0.783	1950	1996	37861
Mbuti.DG	ZlatyKun	China_Tianyuan	Russia_Kostenki14	-0.000722	-0.868	29819	30214	546601
Mbuti.DG	ZlatyKun	China_Tianyuan	Russia_Sunghir.SG	-0.001111	-1.604	30868	31501	570577
Mbuti.DG	ZlatyKun	China_Tianyuan	Russia_Ust_Ishim.DG	-0.00082	-0.977	29112	29556	541721
Mbuti.DG	ZlatyKun	China_Tianyuan	Russia_Yana.SG	-0.000669	-0.966	30248	30630	570573
Mbuti.DG	ZlatyKun	CIO	Czech_Pavlov1	-0.013138	-1.308	26	35	647
Mbuti.DG	ZlatyKun	CIO	Czech_Vestonice	0.000587	0.241	427	422	8501
Mbuti.DG	ZlatyKun	CIO	FRL	0.004487	1.378	319	290	6472
Mbuti.DG	ZlatyKun	CIO	GER_new	0.010016	2.109	134	106	2702
Mbuti.DG	ZlatyKun	CIO	GOY	0.00336	0.882	215	201	4332
Mbuti.DG	ZlatyKun	CIO	GoyetQ116-1	0.00179	0.518	324	313	6378
Mbuti.DG	ZlatyKun	CIO	GoyetQ376-3	-0.001034	-0.083	19	20	403
Mbuti.DG	ZlatyKun	CIO	Italy_Ostuni1	0.010283	2.546	202	162	3886
Mbuti.DG	ZlatyKun	CIO	LRO	-0.00105	-0.048	5	5	119
Mbuti.DG	ZlatyKun	CIO	ORM	0.006553	1.522	231	204	4114
Mbuti.DG	ZlatyKun	CIO	Oase1	-0.003721	-0.554	77	82	1590
Mbuti.DG	ZlatyKun	CIO	PA12	0.001748	0.537	369	356	7366
Mbuti.DG	ZlatyKun	CIO	Paglicci133	-0.006263	-0.551	22	25	499
Mbuti.DG	ZlatyKun	CIO	Muierii1	0.0009	0.313	419	411	8662
Mbuti.DG	ZlatyKun	CIO	Russia_Kostenki12	0.009281	0.984	33	27	651
Mbuti.DG	ZlatyKun	CIO	Russia_Kostenki14	0.004185	1.418	422	388	8184
Mbuti.DG	ZlatyKun	CIO	Russia_Sunghir.SG	0.000777	0.338	443	436	8688
Mbuti.DG	ZlatyKun	CIO	Russia_Ust_Ishim.DG	0.003483	1.252	464	435	8255
Mbuti.DG	ZlatyKun	CIO	Russia_Yana.SG	0.001432	0.556	458	445	8688
Mbuti.DG	ZlatyKun	Czech_Pavlov1	Czech_Vestonice	0.001104	0.969	1810	1765	40288
Mbuti.DG	ZlatyKun	Czech_Pavlov1	FRL	0.002482	1.481	1394	1324	28237
Mbuti.DG	ZlatyKun	Czech_Pavlov1	GER_new	0.002692	1.075	529	500	10804
Mbuti.DG	ZlatyKun	Czech_Pavlov1	GOY	0.000361	0.186	817	810	17745
Mbuti.DG	ZlatyKun	Czech_Pavlov1	GoyetQ116-1	0.00033	0.19	1245	1237	25016
Mbuti.DG	ZlatyKun	Czech_Pavlov1	GoyetQ376-3	-0.003577	-0.461	56	61	1165
Mbuti.DG	ZlatyKun	Czech_Pavlov1	Italy_Ostuni1	0.001724	1.012	962	925	21583
Mbuti.DG	ZlatyKun	Czech_Pavlov1	LRO	-0.016361	-1.294	15	21	382
Mbuti.DG	ZlatyKun	Czech_Pavlov1	ORM	-0.00205	-1.074	911	951	19293
Mbuti.DG	ZlatyKun	Czech_Pavlov1	Oase1	-0.005984	-1.735	296	333	6211
Mbuti.DG	ZlatyKun	Czech_Pavlov1	PA12	0.000993	0.684	1451	1420	31798
Mbuti.DG	ZlatyKun	Czech_Pavlov1	Paglicci133	-0.006506	-0.75	42	48	935
Mbuti.DG	ZlatyKun	Czech_Pavlov1	Muierii1	7.6e-05	0.054	1994	1991	40503
Mbuti.DG	ZlatyKun	Czech_Pavlov1	Russia_Kostenki12	0.000704	0.166	152	149	3434
Mbuti.DG	ZlatyKun	Czech_Pavlov1	Russia_Kostenki14	0.000232	0.152	1835	1826	36248
Mbuti.DG	ZlatyKun	Czech_Pavlov1	Russia_Sunghir.SG	-0.000755	-0.685	1916	1946	40616
Mbuti.DG	ZlatyKun	Czech_Pavlov1	Russia_Ust_Ishim.DG	0.000478	0.341	2097	2078	38749
Mbuti.DG	ZlatyKun	Czech_Pavlov1	Russia_Yana.SG	0.001301	1.016	2082	2029	40616
Mbuti.DG	ZlatyKun	Czech_Vestonice	FRL	0.000301	0.49	18578	18465	375638
Mbuti.DG	ZlatyKun	Czech_Vestonice	GER_new	0.001583	1.999	6642	6428	135284
Mbuti.DG	ZlatyKun	Czech_Vestonice	GOY	-0.000554	-0.899	11016	11143	228653
Mbuti.DG	ZlatyKun	Czech_Vestonice	GoyetQ116-1	0.000339	0.483	16801	16689	329755
Mbuti.DG	ZlatyKun	Czech_Vestonice	GoyetQ376-3	-0.002675	-1.33	755	794	14868
Mbuti.DG	ZlatyKun	Czech_Vestonice	Italy_Ostuni1	0.000251	0.423	10642	10584	231819
Mbuti.DG	ZlatyKun	Czech_Vestonice	LRO	0.000371	0.11	231	230	4673
Mbuti.DG	ZlatyKun	Czech_Vestonice	ORM	-0.000204	-0.299	12775	12828	257531
Mbuti.DG	ZlatyKun	Czech_Vestonice	Oase1	-0.003553	-3.175	3810	4069	72858
Mbuti.DG	ZlatyKun	Czech_Vestonice	PA12	-0.000252	-0.454	20262	20371	432566
Mbuti.DG	ZlatyKun	Czech_Vestonice	Paglicci133	-0.003988	-1.963	649	703	13427
Mbuti.DG	ZlatyKun	Czech_Vestonice	Muierii1	-0.000815	-1.496	30480	30976	608670
Mbuti.DG	ZlatyKun	Czech_Vestonice	Russia_Kostenki12	-6.3e-05	-0.053	1844	1847	38812
Mbuti.DG	ZlatyKun	Czech_Vestonice	Russia_Kostenki14	-0.000138	-0.214	29545	29626	584901
Mbuti.DG	ZlatyKun	Czech_Vestonice	Russia_Sunghir.SG	-0.000641	-1.526	29720	30111	610362
Mbuti.DG	ZlatyKun	Czech_Vestonice	Russia_Ust_Ishim.DG	-0.000116	-0.159	31342	31409	577097
Mbuti.DG	ZlatyKun	Czech_Vestonice	Russia_Yana.SG	-0.000119	-0.244	31719	31792	610346
Mbuti.DG	ZlatyKun	FRL	GER_new	0.000662	0.744	3878	3814	96681
Mbuti.DG	ZlatyKun	FRL	GOY	-0.001168	-1.545	7402	7589	159948
Mbuti.DG	ZlatyKun	FRL	GoyetQ116-1	-0.000293	-0.411	10165	10233	232640
Mbuti.DG	ZlatyKun	FRL	GoyetQ376-3	-0.006639	-2.481	516	588	10876
Mbuti.DG	ZlatyKun	FRL	Italy_Ostuni1	0.000358	0.425	7787	7729	160657
Mbuti.DG	ZlatyKun	FRL	LRO	0.002498	0.598	143	134	3470
Mbuti.DG	ZlatyKun	FRL	ORM	-0.000119	-0.153	7337	7358	171816
Mbuti.DG	ZlatyKun	FRL	Oase1	-0.003155	-2.344	2658	2824	52543
Mbuti.DG	ZlatyKun	FRL	PA12	-0.000802	-1.115	14201	14437	294960
Mbuti.DG	ZlatyKun	FRL	Paglicci133	-0.002117	-0.812	524	546	10591
Mbuti.DG	ZlatyKun	FRL	Muierii1	-0.000768	-1.101	19182	19478	385069
Mbuti.DG	ZlatyKun	FRL	Russia_Kostenki12	-0.001484	-0.863	1295	1334	26316
Mbuti.DG	ZlatyKun	FRL	Russia_Kostenki14	-0.000386	-0.491	18425	18566	365167
Mbuti.DG	ZlatyKun	FRL	Russia_Sunghir.SG	-0.001124	-1.809	19252	19686	386101
Mbuti.DG	ZlatyKun	FRL	Russia_Ust_Ishim.DG	-0.000637	-0.74	19473	19706	366482
Mbuti.DG	ZlatyKun	FRL	Russia_Yana.SG	-0.000551	-0.837	19597	19810	386087
Mbuti.DG	ZlatyKun	GER_new	GOY	-0.000697	-0.657	2672	2714	61132
Mbuti.DG	ZlatyKun	GER_new	GoyetQ116-1	-0.000808	-0.807	3782	3854	88530
Mbuti.DG	ZlatyKun	GER_new	GoyetQ376-3	-0.004089	-1.152	195	213	4484
Mbuti.DG	ZlatyKun	GER_new	Italy_Ostuni1	-0.000215	-0.184	2822	2835	61457
Mbuti.DG	ZlatyKun	GER_new	LRO	0.004867	0.839	54	47	1421
Mbuti.DG	ZlatyKun	GER_new	ORM	-0.00068	-0.627	2668	2712	63574
Mbuti.DG	ZlatyKun	GER_new	Oase1	-0.004225	-2.13	989	1078	20965
Mbuti.DG	ZlatyKun	GER_new	PA12	-0.000784	-0.815	5119	5205	108698
Mbuti.DG	ZlatyKun	GER_new	Paglicci133	-0.004256	-1.07	214	233	4547
Mbuti.DG	ZlatyKun	GER_new	Muierii1	-0.001797	-2.105	6711	6959	137750
Mbuti.DG	ZlatyKun	GER_new	Russia_Kostenki12	-0.003073	-1.144	439	469	9689
Mbuti.DG	ZlatyKun	GER_new	Russia_Kostenki14	-0.001502	-1.677	6235	6430	129294
Mbuti.DG	ZlatyKun	GER_new	Russia_Sunghir.SG	-0.002481	-3.246	6664	7007	138091
Mbuti.DG	ZlatyKun	GER_new	Russia_Ust_Ishim.DG	-0.001849	-1.973	6755	6997	131202
Mbuti.DG	ZlatyKun	GER_new	Russia_Yana.SG	-0.001086	-1.32	6853	7003	138091
Mbuti.DG	ZlatyKun	GOY	GoyetQ116-1	0.001036	1.258	7203	7052	146253
Mbuti.DG	ZlatyKun	GOY	GoyetQ376-3	-0.001825	-0.62	329	342	6982
Mbuti.DG	ZlatyKun	GOY	Italy_Ostuni1	0.002032	2.364	4640	4436	100316
Mbuti.DG	ZlatyKun	GOY	LRO	-0.005054	-0.988	92	103	2228
Mbuti.DG	ZlatyKun	GOY	ORM	0.000945	1.003	5084	4985	105443
Mbuti.DG	ZlatyKun	GOY	Oase1	-0.000554	-0.361	1765	1784	33712
Mbuti.DG	ZlatyKun	GOY	PA12	0.000334	0.484	8473	8412	182457
Mbuti.DG	ZlatyKun	GOY	Paglicci133	-0.005788	-1.912	342	383	7143
Mbuti.DG	ZlatyKun	GOY	Muierii1	0.000206	0.277	11753	11705	233206
Mbuti.DG	ZlatyKun	GOY	Russia_Kostenki12	0.000672	0.314	799	788	16155
Mbuti.DG	ZlatyKun	GOY	Russia_Kostenki14	-0.000148	-0.19	11190	11223	220370
Mbuti.DG	ZlatyKun	GOY	Russia_Sunghir.SG	-0.000113	-0.199	11670	11696	233850
Mbuti.DG	ZlatyKun	GOY	Russia_Ust_Ishim.DG	0.000273	0.326	11926	11865	221854
Mbuti.DG	ZlatyKun	GOY	Russia_Yana.SG	0.000367	0.565	12084	11998	233843
Mbuti.DG	ZlatyKun	GoyetQ116-1	GoyetQ376-3	-0.002507	-0.975	494	521	10737
Mbuti.DG	ZlatyKun	GoyetQ116-1	Italy_Ostuni1	-0.000535	-0.553	7137	7213	142836
Mbuti.DG	ZlatyKun	GoyetQ116-1	LRO	-0.000261	-0.06	140	141	3356
Mbuti.DG	ZlatyKun	GoyetQ116-1	ORM	-0.000997	-1.122	6970	7121	151243
Mbuti.DG	ZlatyKun	GoyetQ116-1	Oase1	-0.003605	-2.438	2530	2707	49084
Mbuti.DG	ZlatyKun	GoyetQ116-1	PA12	-0.000966	-1.225	13268	13525	266169
Mbuti.DG	ZlatyKun	GoyetQ116-1	Paglicci133	-0.002539	-0.985	571	600	11324
Mbuti.DG	ZlatyKun	GoyetQ116-1	Muierii1	-0.000964	-1.237	17012	17336	336082
Mbuti.DG	ZlatyKun	GoyetQ116-1	Russia_Kostenki12	-0.000227	-0.122	1165	1170	23092
Mbuti.DG	ZlatyKun	GoyetQ116-1	Russia_Kostenki14	-0.001115	-1.321	16268	16624	318859
Mbuti.DG	ZlatyKun	GoyetQ116-1	Russia_Sunghir.SG	-0.001172	-1.72	17043	17438	337010
Mbuti.DG	ZlatyKun	GoyetQ116-1	Russia_Ust_Ishim.DG	-0.000918	-1.073	17287	17582	321059
Mbuti.DG	ZlatyKun	GoyetQ116-1	Russia_Yana.SG	-0.000644	-0.907	17388	17605	337004
Mbuti.DG	ZlatyKun	GoyetQ376-3	Italy_Ostuni1	0.002937	0.898	341	321	6697
Mbuti.DG	ZlatyKun	GoyetQ376-3	LRO	-0.025754	-1.794	3	8	199
Mbuti.DG	ZlatyKun	GoyetQ376-3	ORM	0.002198	0.7	352	337	6919
Mbuti.DG	ZlatyKun	GoyetQ376-3	Oase1	-0.00449	-0.862	130	142	2561
Mbuti.DG	ZlatyKun	GoyetQ376-3	PA12	0.000262	0.111	631	628	12390
Mbuti.DG	ZlatyKun	GoyetQ376-3	Paglicci133	-0.000951	-0.089	40	41	745
Mbuti.DG	ZlatyKun	GoyetQ376-3	Muierii1	0.000324	0.148	794	790	15161
Mbuti.DG	ZlatyKun	GoyetQ376-3	Russia_Kostenki12	0.001812	0.224	54	52	1035
Mbuti.DG	ZlatyKun	GoyetQ376-3	Russia_Kostenki14	0.000783	0.332	754	743	14372
Mbuti.DG	ZlatyKun	GoyetQ376-3	Russia_Sunghir.SG	0.000864	0.464	804	791	15203
Mbuti.DG	ZlatyKun	GoyetQ376-3	Russia_Ust_Ishim.DG	-0.001015	-0.47	788	803	14477
Mbuti.DG	ZlatyKun	GoyetQ376-3	Russia_Yana.SG	0.001973	0.998	813	783	15203
Mbuti.DG	ZlatyKun	Italy_Ostuni1	LRO	-0.006426	-1.2	94	108	2224
Mbuti.DG	ZlatyKun	Italy_Ostuni1	ORM	-0.000606	-0.634	5263	5331	110664
Mbuti.DG	ZlatyKun	Italy_Ostuni1	Oase1	-0.002959	-1.796	1789	1892	34991
Mbuti.DG	ZlatyKun	Italy_Ostuni1	PA12	-0.001026	-1.414	7465	7649	179969
Mbuti.DG	ZlatyKun	Italy_Ostuni1	Paglicci133	-0.001217	-0.351	265	272	5614
Mbuti.DG	ZlatyKun	Italy_Ostuni1	Muierii1	-0.000837	-1.098	11395	11590	233606
Mbuti.DG	ZlatyKun	Italy_Ostuni1	Russia_Kostenki12	0.001214	0.664	889	866	18943
Mbuti.DG	ZlatyKun	Italy_Ostuni1	Russia_Kostenki14	-0.000445	-0.54	10678	10774	216321
Mbuti.DG	ZlatyKun	Italy_Ostuni1	Russia_Sunghir.SG	-0.001132	-1.767	11113	11378	234302
Mbuti.DG	ZlatyKun	Italy_Ostuni1	Russia_Ust_Ishim.DG	-0.001392	-1.531	11759	12069	223169
Mbuti.DG	ZlatyKun	Italy_Ostuni1	Russia_Yana.SG	-0.000636	-0.888	11878	12027	234292
Mbuti.DG	ZlatyKun	LRO	ORM	-0.003224	-0.623	98	105	2326
Mbuti.DG	ZlatyKun	LRO	Oase1	-0.003384	-0.394	41	44	825
Mbuti.DG	ZlatyKun	LRO	PA12	-0.000707	-0.168	182	185	3950
Mbuti.DG	ZlatyKun	LRO	Paglicci133	-0.007224	-0.556	9	11	248
Mbuti.DG	ZlatyKun	LRO	Muierii1	-0.001628	-0.429	228	236	4761
Mbuti.DG	ZlatyKun	LRO	Russia_Kostenki12	0.011	0.9	18	14	375
Mbuti.DG	ZlatyKun	LRO	Russia_Kostenki14	0.002318	0.608	225	215	4511
Mbuti.DG	ZlatyKun	LRO	Russia_Sunghir.SG	0.001614	0.527	237	229	4775
Mbuti.DG	ZlatyKun	LRO	Russia_Ust_Ishim.DG	-0.00287	-0.8	229	242	4551
Mbuti.DG	ZlatyKun	LRO	Russia_Yana.SG	-0.003019	-0.93	230	245	4775
Mbuti.DG	ZlatyKun	ORM	Oase1	-0.002755	-1.712	1777	1871	34192
Mbuti.DG	ZlatyKun	ORM	PA12	-1.5e-05	-0.019	9424	9427	194759
Mbuti.DG	ZlatyKun	ORM	Paglicci133	-0.003759	-1.081	295	318	6118
Mbuti.DG	ZlatyKun	ORM	Muierii1	-0.000742	-0.967	13441	13637	263477
Mbuti.DG	ZlatyKun	ORM	Russia_Kostenki12	0.001335	0.646	893	869	17823
Mbuti.DG	ZlatyKun	ORM	Russia_Kostenki14	-0.000602	-0.71	12736	12887	251462
Mbuti.DG	ZlatyKun	ORM	Russia_Sunghir.SG	-0.000578	-0.841	13397	13549	264247
Mbuti.DG	ZlatyKun	ORM	Russia_Ust_Ishim.DG	-4e-05	-0.044	13612	13622	250727
Mbuti.DG	ZlatyKun	ORM	Russia_Yana.SG	3.3e-05	0.048	13803	13795	264242
Mbuti.DG	ZlatyKun	Oase1	PA12	0.002231	1.674	3216	3083	59508
Mbuti.DG	ZlatyKun	Oase1	Paglicci133	-0.009483	-1.754	134	159	2610
Mbuti.DG	ZlatyKun	Oase1	Muierii1	0.003307	2.672	4162	3918	73831
Mbuti.DG	ZlatyKun	Oase1	Russia_Kostenki12	0.001239	0.339	302	295	5583
Mbuti.DG	ZlatyKun	Oase1	Russia_Kostenki14	0.003022	2.357	3849	3642	68678
Mbuti.DG	ZlatyKun	Oase1	Russia_Sunghir.SG	0.002352	2.218	4083	3909	74040
Mbuti.DG	ZlatyKun	Oase1	Russia_Ust_Ishim.DG	0.002451	1.969	3846	3673	70528
Mbuti.DG	ZlatyKun	Oase1	Russia_Yana.SG	0.003213	2.885	4119	3881	74038
Mbuti.DG	ZlatyKun	PA12	Paglicci133	-0.002243	-0.987	587	615	12592
Mbuti.DG	ZlatyKun	PA12	Muierii1	-0.000258	-0.384	22166	22281	445289
Mbuti.DG	ZlatyKun	PA12	Russia_Kostenki12	-0.001407	-0.868	1367	1409	29664
Mbuti.DG	ZlatyKun	PA12	Russia_Kostenki14	0.00038	0.513	21405	21245	423831
Mbuti.DG	ZlatyKun	PA12	Russia_Sunghir.SG	-0.000348	-0.631	21815	21971	446451
Mbuti.DG	ZlatyKun	PA12	Russia_Ust_Ishim.DG	-0.000122	-0.145	22912	22963	422960
Mbuti.DG	ZlatyKun	PA12	Russia_Yana.SG	0.000282	0.46	23123	22997	446441
Mbuti.DG	ZlatyKun	Paglicci133	Muierii1	0.0038	1.563	746	693	13804
Mbuti.DG	ZlatyKun	Paglicci133	Russia_Kostenki12	0.013163	1.631	47	35	899
Mbuti.DG	ZlatyKun	Paglicci133	Russia_Kostenki14	0.003524	1.465	705	659	13124
Mbuti.DG	ZlatyKun	Paglicci133	Russia_Sunghir.SG	0.00293	1.48	727	686	13835
Mbuti.DG	ZlatyKun	Paglicci133	Russia_Ust_Ishim.DG	0.00507	2.233	747	680	13124
Mbuti.DG	ZlatyKun	Paglicci133	Russia_Yana.SG	0.006581	3.139	764	673	13835
Mbuti.DG	ZlatyKun	Muierii1	Russia_Kostenki12	-0.000948	-0.671	1972	2009	39367
Mbuti.DG	ZlatyKun	Muierii1	Russia_Kostenki14	0.000783	1.12	31522	31043	610883
Mbuti.DG	ZlatyKun	Muierii1	Russia_Sunghir.SG	0.000235	0.448	32660	32510	638948
Mbuti.DG	ZlatyKun	Muierii1	Russia_Ust_Ishim.DG	0.000671	0.884	33220	32816	603069
Mbuti.DG	ZlatyKun	Muierii1	Russia_Yana.SG	0.000672	1.142	33875	33446	638936
Mbuti.DG	ZlatyKun	Russia_Kostenki12	Russia_Kostenki14	-0.000497	-0.339	1749	1767	36413
Mbuti.DG	ZlatyKun	Russia_Kostenki12	Russia_Sunghir.SG	-0.001576	-1.419	1779	1842	39469
Mbuti.DG	ZlatyKun	Russia_Kostenki12	Russia_Ust_Ishim.DG	0.000102	0.07	2002	1998	37488
Mbuti.DG	ZlatyKun	Russia_Kostenki12	Russia_Yana.SG	-0.000146	-0.114	2010	2016	39469
Mbuti.DG	ZlatyKun	Russia_Kostenki14	Russia_Sunghir.SG	-0.000451	-0.748	30408	30684	612569
Mbuti.DG	ZlatyKun	Russia_Kostenki14	Russia_Ust_Ishim.DG	-6.1e-05	-0.071	31663	31698	577933
Mbuti.DG	ZlatyKun	Russia_Kostenki14	Russia_Yana.SG	-3.5e-05	-0.054	32139	32161	612552
Mbuti.DG	ZlatyKun	Russia_Sunghir.SG	Russia_Ust_Ishim.DG	0.000424	0.589	33209	32953	604711
Mbuti.DG	ZlatyKun	Russia_Sunghir.SG	Russia_Yana.SG	0.000459	0.952	33796	33502	640676
Mbuti.DG	ZlatyKun	Russia_Ust_Ishim.DG	Russia_Yana.SG	3.7e-05	0.054	33001	32978	604703

## Sheet: D.Solutrean_F4
Outgroup	Pop1	Pop2	Pop3	F4	Z	nBABA	nABBA	nSNPs
Mbuti.DG	LPI	Czech_Vestonice	FRL	0.013711	6.58	813	616	14332
Mbuti.DG	LPI	GoyetQ116-1	FRL	0.005602	2.124	479	422	10152
Mbuti.DG	LPI	Spain_ElMiron	FRL	0.001989	0.765	602	578	11859
Mbuti.DG	FRL	Czech_Vestonice	LPI	0.010742	5.134	813	659	14332
Mbuti.DG	FRL	GoyetQ116-1	LPI	2.1e-05	0.008	479	479	10152
Mbuti.DG	FRL	GoyetQ2	LPI	-0.000781	-0.256	302	308	6932
Mbuti.DG	FRL	Spain_ElMiron	LPI	0.009743	3.796	602	486	11859
Mbuti.DG	GoyetQ116-1	Czech_Vestonice	LPI	0.01164	4.18	444	353	7795
Mbuti.DG	GoyetQ116-1	FRL	LPI	-0.005582	-2.165	422	479	10152
Mbuti.DG	GoyetQ116-1	GoyetQ2	LPI	0.005851	1.384	186	164	3824
Mbuti.DG	GoyetQ116-1	Spain_ElMiron	LPI	0.008984	2.724	317	259	6498
Mbuti.DG	Italy_Villabruna	Czech_Vestonice	LPI	-0.001509	-0.735	575	592	11492
Mbuti.DG	Italy_Villabruna	FRL	LPI	0.004565	2.095	639	575	13918
Mbuti.DG	Italy_Villabruna	GoyetQ116-1	LPI	0.001291	0.441	334	324	7582
Mbuti.DG	Italy_Villabruna	GoyetQ2	LPI	-0.002903	-0.842	224	239	5339
Mbuti.DG	Italy_Villabruna	Spain_ElMiron	LPI	-0.008182	-3.903	674	802	15659
Mbuti.DG	Russia_Kostenki14	Czech_Vestonice	LPI	-0.002187	-0.99	576	601	11433
Mbuti.DG	Russia_Kostenki14	FRL	LPI	0.001077	0.357	362	353	7929
Mbuti.DG	Russia_Kostenki14	GoyetQ116-1	LPI	0.000138	0.045	341	340	7250
Mbuti.DG	Russia_Kostenki14	Spain_ElMiron	LPI	0.000157	0.054	396	394	8775
Mbuti.DG	Russia_Sunghir.SG	Czech_Vestonice	LPI	-0.006146	-3.709	593	668	12292
Mbuti.DG	Russia_Sunghir.SG	FRL	LPI	-0.001334	-0.66	374	386	8680
Mbuti.DG	Russia_Sunghir.SG	GoyetQ116-1	LPI	0.000199	0.085	373	371	7937
Mbuti.DG	Russia_Sunghir.SG	Spain_ElMiron	LPI	-0.002078	-1.03	422	442	9603
Mbuti.DG	Spain_ElMiron	Czech_Vestonice	LPI	0.011378	4.65	546	438	9495
Mbuti.DG	Spain_ElMiron	FRL	LPI	0.007754	3.187	578	486	11859
Mbuti.DG	Spain_ElMiron	GoyetQ116-1	LPI	0.010753	3.43	329	259	6498
Mbuti.DG	Spain_ElMiron	GoyetQ2	LPI	-0.009877	-2.616	178	223	4514

## Sheet: E.Among_Epigravettian_F4
Outgroup	Epigravettian1	Epigravettain2	Epigravettian3	F4	Z	nBABA	nABBA	nSNPs
Mbuti.DG	AC16	Italy_GrottaContinenza_R11.SG	Italy_GrottaContinenza_R15.SG	6.5e-05	0.086	22181	22148	508895
Mbuti.DG	AC16	Italy_GrottaContinenza_R11.SG	Italy_GrottaContinenza_R7.SG	0.000106	0.135	21495	21441	509894
Mbuti.DG	AC16	Italy_GrottaContinenza_R11.SG	Italy_OrienteC	-0.001019	-1.039	6608	6762	151240
Mbuti.DG	AC16	Italy_GrottaContinenza_R11.SG	Italy_Uzzo_EM	0.001348	1.652	18078	17527	408701
Mbuti.DG	AC16	Italy_GrottaContinenza_R11.SG	STO	-0.00025	-0.291	19871	19983	450359
Mbuti.DG	AC16	Italy_GrottaContinenza_R11.SG	Italy_Villabruna	-0.005217	-5.998	19481	21787	441993
Mbuti.DG	AC16	Italy_GrottaContinenza_R11.SG	RIP	-0.004011	-4.543	11272	12306	257700
Mbuti.DG	AC16	Italy_GrottaContinenza_R11.SG	PRD	-0.010739	-10.515	5212	6547	124325
Mbuti.DG	AC16	Italy_GrottaContinenza_R15.SG	Italy_GrottaContinenza_R7.SG	-7.6e-05	-0.107	32380	32437	759414
Mbuti.DG	AC16	Italy_GrottaContinenza_R15.SG	Italy_OrienteC	-0.001411	-1.718	9682	10000	225384
Mbuti.DG	AC16	Italy_GrottaContinenza_R15.SG	Italy_Uzzo_EM	0.000961	1.396	26790	26205	608858
Mbuti.DG	AC16	Italy_GrottaContinenza_R15.SG	STO	-0.000265	-0.322	29704	29880	668124
Mbuti.DG	AC16	Italy_GrottaContinenza_R15.SG	Italy_Villabruna	-0.005807	-7.19	28781	32614	660111
Mbuti.DG	AC16	Italy_GrottaContinenza_R15.SG	RIP	-0.004792	-5.824	16622	18467	385039
Mbuti.DG	AC16	Italy_GrottaContinenza_R15.SG	PRD	-0.011453	-12.295	7693	9821	185827
Mbuti.DG	AC16	Italy_GrottaContinenza_R7.SG	Italy_OrienteC	-0.001101	-1.193	9763	10011	225704
Mbuti.DG	AC16	Italy_GrottaContinenza_R7.SG	Italy_Uzzo_EM	0.001093	1.38	26757	26091	609918
Mbuti.DG	AC16	Italy_GrottaContinenza_R7.SG	STO	-0.000281	-0.352	29448	29636	669464
Mbuti.DG	AC16	Italy_GrottaContinenza_R7.SG	Italy_Villabruna	-0.005559	-7.114	28644	32319	661067
Mbuti.DG	AC16	Italy_GrottaContinenza_R7.SG	RIP	-0.00444	-5.286	16705	18417	385541
Mbuti.DG	AC16	Italy_GrottaContinenza_R7.SG	PRD	-0.01187	-12.846	7612	9821	186048
Mbuti.DG	AC16	Italy_OrienteC	Italy_Uzzo_EM	0.002337	3.172	7059	6592	200006
Mbuti.DG	AC16	Italy_OrienteC	STO	0.000834	0.961	8739	8561	213331
Mbuti.DG	AC16	Italy_OrienteC	Italy_Villabruna	-0.004651	-5.124	9493	10509	218363
Mbuti.DG	AC16	Italy_OrienteC	RIP	-0.00307	-3.095	5754	6155	130602
Mbuti.DG	AC16	Italy_OrienteC	PRD	-0.010096	-7.902	2727	3388	65487
Mbuti.DG	AC16	Italy_Uzzo_EM	STO	-0.001577	-2.018	21665	22543	556958
Mbuti.DG	AC16	Italy_Uzzo_EM	Italy_Villabruna	-0.007336	-8.541	23479	27581	559241
Mbuti.DG	AC16	Italy_Uzzo_EM	RIP	-0.00588	-6.854	14248	16219	335233
Mbuti.DG	AC16	Italy_Uzzo_EM	PRD	-0.01308	-13.934	6556	8702	164061
Mbuti.DG	AC16	STO	Italy_Villabruna	-0.005433	-6.449	26217	29514	606794
Mbuti.DG	AC16	STO	RIP	-0.004867	-5.375	15526	17249	354088
Mbuti.DG	AC16	STO	PRD	-0.011566	-11.951	7234	9228	172400
Mbuti.DG	AC16	Italy_Villabruna	RIP	0.001061	1.307	16532	16151	358788
Mbuti.DG	AC16	Italy_Villabruna	PRD	-0.005553	-5.757	7835	8810	175628
Mbuti.DG	AC16	RIP	PRD	-0.006584	-6.188	4742	5464	109678
Mbuti.DG	Italy_GrottaContinenza_R11.SG	AC16	Italy_GrottaContinenza_R15.SG	0.00066	0.799	22484	22148	508895
Mbuti.DG	Italy_GrottaContinenza_R11.SG	AC16	Italy_GrottaContinenza_R7.SG	0.004126	4.901	23544	21441	509894
Mbuti.DG	Italy_GrottaContinenza_R11.SG	AC16	Italy_OrienteC	-0.001048	-1.058	6603	6762	151240
Mbuti.DG	Italy_GrottaContinenza_R11.SG	AC16	Italy_Uzzo_EM	-2.1e-05	-0.025	17519	17527	408701
Mbuti.DG	Italy_GrottaContinenza_R11.SG	AC16	STO	-0.001191	-1.52	19447	19983	450359
Mbuti.DG	Italy_GrottaContinenza_R11.SG	AC16	Italy_Villabruna	-0.006538	-7.51	18897	21787	441993
Mbuti.DG	Italy_GrottaContinenza_R11.SG	AC16	RIP	-0.00547	-5.947	10896	12306	257700
Mbuti.DG	Italy_GrottaContinenza_R11.SG	AC16	PRD	-0.011141	-10.543	5162	6547	124325
Mbuti.DG	Italy_GrottaContinenza_R11.SG	Italy_GrottaContinenza_R15.SG	Italy_GrottaContinenza_R7.SG	0.003509	4.619	30381	28009	675931
Mbuti.DG	Italy_GrottaContinenza_R11.SG	Italy_GrottaContinenza_R15.SG	Italy_OrienteC	-0.002696	-2.899	7601	8077	176739
Mbuti.DG	Italy_GrottaContinenza_R11.SG	Italy_GrottaContinenza_R15.SG	Italy_Uzzo_EM	-0.000674	-0.882	21014	21340	483911
Mbuti.DG	Italy_GrottaContinenza_R11.SG	Italy_GrottaContinenza_R15.SG	STO	-0.001761	-2.296	24914	25918	570252
Mbuti.DG	Italy_GrottaContinenza_R11.SG	Italy_GrottaContinenza_R15.SG	Italy_Villabruna	-0.007589	-9.133	23391	27512	542906
Mbuti.DG	Italy_GrottaContinenza_R11.SG	Italy_GrottaContinenza_R15.SG	RIP	-0.006793	-7.733	12969	15041	305118
Mbuti.DG	Italy_GrottaContinenza_R11.SG	Italy_GrottaContinenza_R15.SG	PRD	-0.011226	-11.508	6029	7648	144259
Mbuti.DG	Italy_GrottaContinenza_R11.SG	Italy_GrottaContinenza_R7.SG	Italy_OrienteC	-0.006043	-6.227	7303	8373	177114
Mbuti.DG	Italy_GrottaContinenza_R11.SG	Italy_GrottaContinenza_R7.SG	Italy_Uzzo_EM	-0.004195	-5.175	20121	22156	484995
Mbuti.DG	Italy_GrottaContinenza_R11.SG	Italy_GrottaContinenza_R7.SG	STO	-0.005501	-6.943	23736	26880	571493
Mbuti.DG	Italy_GrottaContinenza_R11.SG	Italy_GrottaContinenza_R7.SG	Italy_Villabruna	-0.01121	-13.409	22383	28480	543974
Mbuti.DG	Italy_GrottaContinenza_R11.SG	Italy_GrottaContinenza_R7.SG	RIP	-0.009684	-11.119	12542	15501	305561
Mbuti.DG	Italy_GrottaContinenza_R11.SG	Italy_GrottaContinenza_R7.SG	PRD	-0.014519	-14.558	5768	7866	144495
Mbuti.DG	Italy_GrottaContinenza_R11.SG	Italy_OrienteC	Italy_Uzzo_EM	0.001131	1.46	5216	5048	148677
Mbuti.DG	Italy_GrottaContinenza_R11.SG	Italy_OrienteC	STO	0.000426	0.486	6795	6725	164868
Mbuti.DG	Italy_GrottaContinenza_R11.SG	Italy_OrienteC	Italy_Villabruna	-0.004807	-5.01	7296	8098	166887
Mbuti.DG	Italy_GrottaContinenza_R11.SG	Italy_OrienteC	RIP	-0.005462	-5.031	4167	4696	96843
Mbuti.DG	Italy_GrottaContinenza_R11.SG	Italy_OrienteC	PRD	-0.008612	-6.198	2033	2447	48014
Mbuti.DG	Italy_GrottaContinenza_R11.SG	Italy_Uzzo_EM	STO	-0.000821	-1.16	17069	17425	433524
Mbuti.DG	Italy_GrottaContinenza_R11.SG	Italy_Uzzo_EM	Italy_Villabruna	-0.007054	-8.478	17933	20944	426830
Mbuti.DG	Italy_GrottaContinenza_R11.SG	Italy_Uzzo_EM	RIP	-0.005346	-6.195	10492	11821	248584
Mbuti.DG	Italy_GrottaContinenza_R11.SG	Italy_Uzzo_EM	PRD	-0.011382	-10.998	4927	6293	120033
Mbuti.DG	Italy_GrottaContinenza_R11.SG	STO	Italy_Villabruna	-0.006104	-7.442	21048	24031	488716
Mbuti.DG	Italy_GrottaContinenza_R11.SG	STO	RIP	-0.004571	-5.348	12124	13379	274520
Mbuti.DG	Italy_GrottaContinenza_R11.SG	STO	PRD	-0.009361	-9.173	5682	6913	131510
Mbuti.DG	Italy_GrottaContinenza_R11.SG	Italy_Villabruna	RIP	0.001298	1.508	12698	12343	273689
Mbuti.DG	Italy_GrottaContinenza_R11.SG	Italy_Villabruna	PRD	-0.004529	-4.483	5977	6575	132104
Mbuti.DG	Italy_GrottaContinenza_R11.SG	RIP	PRD	-0.004318	-3.588	3549	3894	79924
Mbuti.DG	Italy_GrottaContinenza_R15.SG	AC16	Italy_GrottaContinenza_R11.SG	0.000595	0.77	22484	22181	508895
Mbuti.DG	Italy_GrottaContinenza_R15.SG	AC16	Italy_GrottaContinenza_R7.SG	0.002833	3.802	34588	32437	759414
Mbuti.DG	Italy_GrottaContinenza_R15.SG	AC16	Italy_OrienteC	-0.000158	-0.19	9964	10000	225384
Mbuti.DG	Italy_GrottaContinenza_R15.SG	AC16	Italy_Uzzo_EM	5.2e-05	0.07	26236	26205	608858
Mbuti.DG	Italy_GrottaContinenza_R15.SG	AC16	STO	-0.001808	-2.373	28672	29880	668124
Mbuti.DG	Italy_GrottaContinenza_R15.SG	AC16	Italy_Villabruna	-0.007173	-9.243	27880	32614	660111
Mbuti.DG	Italy_GrottaContinenza_R15.SG	AC16	RIP	-0.005457	-6.63	16366	18467	385039
Mbuti.DG	Italy_GrottaContinenza_R15.SG	AC16	PRD	-0.011348	-12.054	7712	9821	185827
Mbuti.DG	Italy_GrottaContinenza_R15.SG	Italy_GrottaContinenza_R11.SG	Italy_GrottaContinenza_R7.SG	0.002009	2.799	29367	28009	675931
Mbuti.DG	Italy_GrottaContinenza_R15.SG	Italy_GrottaContinenza_R11.SG	Italy_OrienteC	-0.001589	-1.831	7796	8077	176739
Mbuti.DG	Italy_GrottaContinenza_R15.SG	Italy_GrottaContinenza_R11.SG	Italy_Uzzo_EM	-0.000365	-0.469	21164	21340	483911
Mbuti.DG	Italy_GrottaContinenza_R15.SG	Italy_GrottaContinenza_R11.SG	STO	-0.002381	-3.157	24560	25918	570252
Mbuti.DG	Italy_GrottaContinenza_R15.SG	Italy_GrottaContinenza_R11.SG	Italy_Villabruna	-0.007811	-10.11	23271	27512	542906
Mbuti.DG	Italy_GrottaContinenza_R15.SG	Italy_GrottaContinenza_R11.SG	RIP	-0.006262	-7.36	13131	15041	305118
Mbuti.DG	Italy_GrottaContinenza_R15.SG	Italy_GrottaContinenza_R11.SG	PRD	-0.010841	-10.828	6084	7648	144259
Mbuti.DG	Italy_GrottaContinenza_R15.SG	Italy_GrottaContinenza_R7.SG	Italy_OrienteC	-0.003847	-4.846	11200	12213	263546
Mbuti.DG	Italy_GrottaContinenza_R15.SG	Italy_GrottaContinenza_R7.SG	Italy_Uzzo_EM	-0.002727	-3.737	30630	32597	721337
Mbuti.DG	Italy_GrottaContinenza_R15.SG	Italy_GrottaContinenza_R7.SG	STO	-0.004578	-6.002	35812	39686	846253
Mbuti.DG	Italy_GrottaContinenza_R15.SG	Italy_GrottaContinenza_R7.SG	Italy_Villabruna	-0.010116	-13.344	33772	41978	811148
Mbuti.DG	Italy_GrottaContinenza_R15.SG	Italy_GrottaContinenza_R7.SG	RIP	-0.008197	-10.132	19147	22888	456395
Mbuti.DG	Italy_GrottaContinenza_R15.SG	Italy_GrottaContinenza_R7.SG	PRD	-0.013699	-14.52	8720	11673	215578
Mbuti.DG	Italy_GrottaContinenza_R15.SG	Italy_OrienteC	Italy_Uzzo_EM	0.000654	0.954	7719	7574	221111
Mbuti.DG	Italy_GrottaContinenza_R15.SG	Italy_OrienteC	STO	-0.00117	-1.437	9953	10240	244639
Mbuti.DG	Italy_GrottaContinenza_R15.SG	Italy_OrienteC	Italy_Villabruna	-0.006216	-7.209	10766	12313	248862
Mbuti.DG	Italy_GrottaContinenza_R15.SG	Italy_OrienteC	RIP	-0.004945	-5.347	6313	7028	144522
Mbuti.DG	Italy_GrottaContinenza_R15.SG	Italy_OrienteC	PRD	-0.010836	-9.422	2969	3745	71549
Mbuti.DG	Italy_GrottaContinenza_R15.SG	Italy_Uzzo_EM	STO	-0.001878	-2.701	25111	26317	642329
Mbuti.DG	Italy_GrottaContinenza_R15.SG	Italy_Uzzo_EM	Italy_Villabruna	-0.007243	-9.246	26831	31440	636401
Mbuti.DG	Italy_GrottaContinenza_R15.SG	Italy_Uzzo_EM	RIP	-0.005833	-7.307	15717	17881	371061
Mbuti.DG	Italy_GrottaContinenza_R15.SG	Italy_Uzzo_EM	PRD	-0.011008	-12.135	7374	9344	178984
Mbuti.DG	Italy_GrottaContinenza_R15.SG	STO	Italy_Villabruna	-0.005675	-7.456	31567	35687	725893
Mbuti.DG	Italy_GrottaContinenza_R15.SG	STO	RIP	-0.00394	-4.775	18189	19799	408623
Mbuti.DG	Italy_GrottaContinenza_R15.SG	STO	PRD	-0.009409	-9.747	8450	10290	195599
Mbuti.DG	Italy_GrottaContinenza_R15.SG	Italy_Villabruna	RIP	0.001849	2.28	19164	18407	409614
Mbuti.DG	Italy_GrottaContinenza_R15.SG	Italy_Villabruna	PRD	-0.00333	-3.655	9042	9699	197349
Mbuti.DG	Italy_GrottaContinenza_R15.SG	RIP	PRD	-0.005644	-5.585	5226	5899	119354
Mbuti.DG	Italy_GrottaContinenza_R7.SG	AC16	Italy_GrottaContinenza_R11.SG	0.004019	4.817	23544	21495	509894
Mbuti.DG	Italy_GrottaContinenza_R7.SG	AC16	Italy_GrottaContinenza_R15.SG	0.002908	3.852	34588	32380	759414
Mbuti.DG	Italy_GrottaContinenza_R7.SG	AC16	Italy_OrienteC	0.00037	0.393	10095	10011	225704
Mbuti.DG	Italy_GrottaContinenza_R7.SG	AC16	Italy_Uzzo_EM	0.000582	0.733	26445	26091	609918
Mbuti.DG	Italy_GrottaContinenza_R7.SG	AC16	STO	-0.000705	-0.869	29164	29636	669464
Mbuti.DG	Italy_GrottaContinenza_R7.SG	AC16	Italy_Villabruna	-0.006358	-8.041	28115	32319	661067
Mbuti.DG	Italy_GrottaContinenza_R7.SG	AC16	RIP	-0.005153	-6.18	16431	18417	385541
Mbuti.DG	Italy_GrottaContinenza_R7.SG	AC16	PRD	-0.011325	-12.351	7714	9821	186048
Mbuti.DG	Italy_GrottaContinenza_R7.SG	Italy_GrottaContinenza_R11.SG	Italy_GrottaContinenza_R15.SG	-0.0015	-1.913	29367	30381	675931
Mbuti.DG	Italy_GrottaContinenza_R7.SG	Italy_GrottaContinenza_R11.SG	Italy_OrienteC	-0.004517	-4.751	7573	8373	177114
Mbuti.DG	Italy_GrottaContinenza_R7.SG	Italy_GrottaContinenza_R11.SG	Italy_Uzzo_EM	-0.003156	-3.798	20625	22156	484995
Mbuti.DG	Italy_GrottaContinenza_R7.SG	Italy_GrottaContinenza_R11.SG	STO	-0.004725	-5.629	24180	26880	571493
Mbuti.DG	Italy_GrottaContinenza_R7.SG	Italy_GrottaContinenza_R11.SG	Italy_Villabruna	-0.010689	-12.825	22666	28480	543974
Mbuti.DG	Italy_GrottaContinenza_R7.SG	Italy_GrottaContinenza_R11.SG	RIP	-0.009208	-10.683	12688	15501	305561
Mbuti.DG	Italy_GrottaContinenza_R7.SG	Italy_GrottaContinenza_R11.SG	PRD	-0.014349	-13.974	5792	7866	144495
Mbuti.DG	Italy_GrottaContinenza_R7.SG	Italy_GrottaContinenza_R15.SG	Italy_OrienteC	-0.003643	-4.333	11253	12213	263546
Mbuti.DG	Italy_GrottaContinenza_R7.SG	Italy_GrottaContinenza_R15.SG	Italy_Uzzo_EM	-0.002301	-3.174	30937	32597	721337
Mbuti.DG	Italy_GrottaContinenza_R7.SG	Italy_GrottaContinenza_R15.SG	STO	-0.00368	-4.609	36571	39686	846253
Mbuti.DG	Italy_GrottaContinenza_R7.SG	Italy_GrottaContinenza_R15.SG	Italy_Villabruna	-0.009591	-12.414	34198	41978	811148
Mbuti.DG	Italy_GrottaContinenza_R7.SG	Italy_GrottaContinenza_R15.SG	RIP	-0.008051	-9.971	19213	22888	456395
Mbuti.DG	Italy_GrottaContinenza_R7.SG	Italy_GrottaContinenza_R15.SG	PRD	-0.013239	-14.442	8819	11673	215578
Mbuti.DG	Italy_GrottaContinenza_R7.SG	Italy_OrienteC	Italy_Uzzo_EM	0.000977	1.399	7730	7514	221424
Mbuti.DG	Italy_GrottaContinenza_R7.SG	Italy_OrienteC	STO	-0.000525	-0.616	10078	10207	245131
Mbuti.DG	Italy_GrottaContinenza_R7.SG	Italy_OrienteC	Italy_Villabruna	-0.005641	-6.072	10825	12231	249279
Mbuti.DG	Italy_GrottaContinenza_R7.SG	Italy_OrienteC	RIP	-0.004088	-4.065	6314	6905	144661
Mbuti.DG	Italy_GrottaContinenza_R7.SG	Italy_OrienteC	PRD	-0.009085	-7.429	3057	3707	71638
Mbuti.DG	Italy_GrottaContinenza_R7.SG	Italy_Uzzo_EM	STO	-0.001369	-1.831	25316	26197	643627
Mbuti.DG	Italy_GrottaContinenza_R7.SG	Italy_Uzzo_EM	Italy_Villabruna	-0.007207	-8.773	26854	31448	637350
Mbuti.DG	Italy_GrottaContinenza_R7.SG	Italy_Uzzo_EM	RIP	-0.005657	-6.949	15695	17797	371498
Mbuti.DG	Italy_GrottaContinenza_R7.SG	Italy_Uzzo_EM	PRD	-0.011059	-12.03	7327	9308	179130
Mbuti.DG	Italy_GrottaContinenza_R7.SG	STO	Italy_Villabruna	-0.005829	-6.794	31429	35669	727212
Mbuti.DG	Italy_GrottaContinenza_R7.SG	STO	RIP	-0.004615	-5.259	18168	20057	409188
Mbuti.DG	Italy_GrottaContinenza_R7.SG	STO	PRD	-0.009419	-9.873	8426	10271	195887
Mbuti.DG	Italy_GrottaContinenza_R7.SG	Italy_Villabruna	RIP	0.001697	2.113	19035	18340	410033
Mbuti.DG	Italy_GrottaContinenza_R7.SG	Italy_Villabruna	PRD	-0.004117	-4.531	8962	9775	197532
Mbuti.DG	Italy_GrottaContinenza_R7.SG	RIP	PRD	-0.004041	-3.899	5334	5817	119381
Mbuti.DG	Italy_OrienteC	AC16	Italy_GrottaContinenza_R11.SG	-2.9e-05	-0.029	6603	6608	151240
Mbuti.DG	Italy_OrienteC	AC16	Italy_GrottaContinenza_R15.SG	0.001252	1.498	9964	9682	225384
Mbuti.DG	Italy_OrienteC	AC16	Italy_GrottaContinenza_R7.SG	0.001471	1.606	10095	9763	225704
Mbuti.DG	Italy_OrienteC	AC16	Italy_Uzzo_EM	0.021845	22.301	10961	6592	200006
Mbuti.DG	Italy_OrienteC	AC16	STO	0.007578	8.196	10177	8561	213331
Mbuti.DG	Italy_OrienteC	AC16	Italy_Villabruna	-0.004151	-4.35	9602	10509	218363
Mbuti.DG	Italy_OrienteC	AC16	RIP	-0.004432	-4.185	5576	6155	130602
Mbuti.DG	Italy_OrienteC	AC16	PRD	-0.009805	-7.926	2746	3388	65487
Mbuti.DG	Italy_OrienteC	Italy_GrottaContinenza_R11.SG	Italy_GrottaContinenza_R15.SG	0.001107	1.246	7796	7601	176739
Mbuti.DG	Italy_OrienteC	Italy_GrottaContinenza_R11.SG	Italy_GrottaContinenza_R7.SG	0.001526	1.69	7573	7303	177114
Mbuti.DG	Italy_OrienteC	Italy_GrottaContinenza_R11.SG	Italy_Uzzo_EM	0.021698	21.205	8274	5048	148677
Mbuti.DG	Italy_OrienteC	Italy_GrottaContinenza_R11.SG	STO	0.007256	7.575	7921	6725	164868
Mbuti.DG	Italy_OrienteC	Italy_GrottaContinenza_R11.SG	Italy_Villabruna	-0.003915	-4.081	7445	8098	166887
Mbuti.DG	Italy_OrienteC	Italy_GrottaContinenza_R11.SG	RIP	-0.004648	-4.293	4246	4696	96843
Mbuti.DG	Italy_OrienteC	Italy_GrottaContinenza_R11.SG	PRD	-0.008957	-6.41	2017	2447	48014
Mbuti.DG	Italy_OrienteC	Italy_GrottaContinenza_R15.SG	Italy_GrottaContinenza_R7.SG	0.000204	0.246	11253	11200	263546
Mbuti.DG	Italy_OrienteC	Italy_GrottaContinenza_R15.SG	Italy_Uzzo_EM	0.020813	22.036	12176	7574	221111
Mbuti.DG	Italy_OrienteC	Italy_GrottaContinenza_R15.SG	STO	0.006313	6.86	11784	10240	244639
Mbuti.DG	Italy_OrienteC	Italy_GrottaContinenza_R15.SG	Italy_Villabruna	-0.005048	-5.542	11056	12313	248862
Mbuti.DG	Italy_OrienteC	Italy_GrottaContinenza_R15.SG	RIP	-0.005809	-5.926	6188	7028	144522
Mbuti.DG	Italy_OrienteC	Italy_GrottaContinenza_R15.SG	PRD	-0.00999	-8.543	3030	3745	71549
Mbuti.DG	Italy_OrienteC	Italy_GrottaContinenza_R7.SG	Italy_Uzzo_EM	0.020537	21.148	12061	7514	221424
Mbuti.DG	Italy_OrienteC	Italy_GrottaContinenza_R7.SG	STO	0.006057	6.488	11691	10207	245131
Mbuti.DG	Italy_OrienteC	Italy_GrottaContinenza_R7.SG	Italy_Villabruna	-0.005404	-6.013	10884	12231	249279
Mbuti.DG	Italy_OrienteC	Italy_GrottaContinenza_R7.SG	RIP	-0.005341	-5.183	6133	6905	144661
Mbuti.DG	Italy_OrienteC	Italy_GrottaContinenza_R7.SG	PRD	-0.010737	-9.291	2938	3707	71638
Mbuti.DG	Italy_OrienteC	Italy_Uzzo_EM	STO	-0.014572	-15.208	7081	10139	209902
Mbuti.DG	Italy_OrienteC	Italy_Uzzo_EM	Italy_Villabruna	-0.025842	-25.126	7278	12830	214851
Mbuti.DG	Italy_OrienteC	Italy_Uzzo_EM	RIP	-0.026264	-23.821	4297	7677	128705
Mbuti.DG	Italy_OrienteC	Italy_Uzzo_EM	PRD	-0.031307	-24.398	2055	4070	64369
Mbuti.DG	Italy_OrienteC	STO	Italy_Villabruna	-0.011813	-11.894	9499	12285	235787
Mbuti.DG	Italy_OrienteC	STO	RIP	-0.012576	-11.613	5453	7183	137557
Mbuti.DG	Italy_OrienteC	STO	PRD	-0.017976	-14.798	2641	3873	68546
Mbuti.DG	Italy_OrienteC	Italy_Villabruna	RIP	-0.000685	-0.673	6371	6468	141455
Mbuti.DG	Italy_OrienteC	Italy_Villabruna	PRD	-0.006181	-5.029	3125	3561	70540
Mbuti.DG	Italy_OrienteC	RIP	PRD	-0.005387	-3.976	1933	2171	44241
Mbuti.DG	Italy_Uzzo_EM	AC16	Italy_GrottaContinenza_R11.SG	-0.001369	-1.649	17519	18078	408701
Mbuti.DG	Italy_Uzzo_EM	AC16	Italy_GrottaContinenza_R15.SG	-0.000909	-1.195	26236	26790	608858
Mbuti.DG	Italy_Uzzo_EM	AC16	Italy_GrottaContinenza_R7.SG	-0.000511	-0.644	26445	26757	609918
Mbuti.DG	Italy_Uzzo_EM	AC16	Italy_OrienteC	0.019508	19.515	10961	7059	200006
Mbuti.DG	Italy_Uzzo_EM	AC16	STO	0.007085	8.426	26489	22543	556958
Mbuti.DG	Italy_Uzzo_EM	AC16	Italy_Villabruna	-0.006776	-7.969	23791	27581	559241
Mbuti.DG	Italy_Uzzo_EM	AC16	RIP	-0.006258	-7.255	14121	16219	335233
Mbuti.DG	Italy_Uzzo_EM	AC16	PRD	-0.012535	-13.143	6645	8702	164061
Mbuti.DG	Italy_Uzzo_EM	Italy_GrottaContinenza_R11.SG	Italy_GrottaContinenza_R15.SG	0.000309	0.403	21164	21014	483911
Mbuti.DG	Italy_Uzzo_EM	Italy_GrottaContinenza_R11.SG	Italy_GrottaContinenza_R7.SG	0.001038	1.315	20625	20121	484995
Mbuti.DG	Italy_Uzzo_EM	Italy_GrottaContinenza_R11.SG	Italy_OrienteC	0.020567	19.643	8274	5216	148677
Mbuti.DG	Italy_Uzzo_EM	Italy_GrottaContinenza_R11.SG	STO	0.008578	9.703	21143	17425	433524
Mbuti.DG	Italy_Uzzo_EM	Italy_GrottaContinenza_R11.SG	Italy_Villabruna	-0.005028	-5.922	18798	20944	426830
Mbuti.DG	Italy_Uzzo_EM	Italy_GrottaContinenza_R11.SG	RIP	-0.003801	-4.372	10876	11821	248584
Mbuti.DG	Italy_Uzzo_EM	Italy_GrottaContinenza_R11.SG	PRD	-0.010348	-10.646	5051	6293	120033
Mbuti.DG	Italy_Uzzo_EM	Italy_GrottaContinenza_R15.SG	Italy_GrottaContinenza_R7.SG	0.000426	0.591	30937	30630	721337
Mbuti.DG	Italy_Uzzo_EM	Italy_GrottaContinenza_R15.SG	Italy_OrienteC	0.02016	20.465	12176	7719	221111
Mbuti.DG	Italy_Uzzo_EM	Italy_GrottaContinenza_R15.SG	STO	0.008194	9.576	31581	26317	642329
Mbuti.DG	Italy_Uzzo_EM	Italy_GrottaContinenza_R15.SG	Italy_Villabruna	-0.005762	-7.121	27774	31440	636401
Mbuti.DG	Italy_Uzzo_EM	Italy_GrottaContinenza_R15.SG	RIP	-0.005238	-6.377	15937	17881	371061
Mbuti.DG	Italy_Uzzo_EM	Italy_GrottaContinenza_R15.SG	PRD	-0.010303	-11.106	7500	9344	178984
Mbuti.DG	Italy_Uzzo_EM	Italy_GrottaContinenza_R7.SG	Italy_OrienteC	0.01956	20.914	12061	7730	221424
Mbuti.DG	Italy_Uzzo_EM	Italy_GrottaContinenza_R7.SG	STO	0.007682	9.342	31141	26197	643627
Mbuti.DG	Italy_Uzzo_EM	Italy_GrottaContinenza_R7.SG	Italy_Villabruna	-0.006118	-7.637	27548	31448	637350
Mbuti.DG	Italy_Uzzo_EM	Italy_GrottaContinenza_R7.SG	RIP	-0.00521	-6.266	15861	17797	371498
Mbuti.DG	Italy_Uzzo_EM	Italy_GrottaContinenza_R7.SG	PRD	-0.010742	-11.77	7384	9308	179130
Mbuti.DG	Italy_Uzzo_EM	Italy_OrienteC	STO	-0.012176	-12.492	7584	10139	209902
Mbuti.DG	Italy_Uzzo_EM	Italy_OrienteC	Italy_Villabruna	-0.025217	-24.624	7412	12830	214851
Mbuti.DG	Italy_Uzzo_EM	Italy_OrienteC	RIP	-0.025442	-22.825	4402	7677	128705
Mbuti.DG	Italy_Uzzo_EM	Italy_OrienteC	PRD	-0.02997	-22.435	2141	4070	64369
Mbuti.DG	Italy_Uzzo_EM	STO	Italy_Villabruna	-0.013751	-15.737	23364	31459	588687
Mbuti.DG	Italy_Uzzo_EM	STO	RIP	-0.013073	-14.521	13822	18317	343835
Mbuti.DG	Italy_Uzzo_EM	STO	PRD	-0.018404	-18.116	6572	9650	167254
Mbuti.DG	Italy_Uzzo_EM	Italy_Villabruna	RIP	0.000711	0.818	16053	15805	348924
Mbuti.DG	Italy_Uzzo_EM	Italy_Villabruna	PRD	-0.005042	-5.397	7658	8518	170497
Mbuti.DG	Italy_Uzzo_EM	RIP	PRD	-0.005345	-5.339	4664	5235	106721
Mbuti.DG	STO	AC16	Italy_GrottaContinenza_R11.SG	-0.000941	-1.16	19447	19871	450359
Mbuti.DG	STO	AC16	Italy_GrottaContinenza_R15.SG	-0.001544	-1.917	28672	29704	668124
Mbuti.DG	STO	AC16	Italy_GrottaContinenza_R7.SG	-0.000423	-0.51	29164	29448	669464
Mbuti.DG	STO	AC16	Italy_OrienteC	0.006744	7.073	10177	8739	213331
Mbuti.DG	STO	AC16	Italy_Uzzo_EM	0.008662	10.104	26489	21665	556958
Mbuti.DG	STO	AC16	Italy_Villabruna	-0.005643	-6.481	26090	29514	606794
Mbuti.DG	STO	AC16	RIP	-0.006976	-7.59	14779	17249	354088
Mbuti.DG	STO	AC16	PRD	-0.013096	-13.678	6971	9228	172400
Mbuti.DG	STO	Italy_GrottaContinenza_R11.SG	Italy_GrottaContinenza_R15.SG	-0.00062	-0.837	24560	24914	570252
Mbuti.DG	STO	Italy_GrottaContinenza_R11.SG	Italy_GrottaContinenza_R7.SG	0.000777	1.012	24180	23736	571493
Mbuti.DG	STO	Italy_GrottaContinenza_R11.SG	Italy_OrienteC	0.00683	7.131	7921	6795	164868
Mbuti.DG	STO	Italy_GrottaContinenza_R11.SG	Italy_Uzzo_EM	0.009399	10.618	21143	17069	433524
Mbuti.DG	STO	Italy_GrottaContinenza_R11.SG	Italy_Villabruna	-0.004944	-5.773	21615	24031	488716
Mbuti.DG	STO	Italy_GrottaContinenza_R11.SG	RIP	-0.005883	-6.589	11764	13379	274520
Mbuti.DG	STO	Italy_GrottaContinenza_R11.SG	PRD	-0.010556	-10.467	5525	6913	131510
Mbuti.DG	STO	Italy_GrottaContinenza_R15.SG	Italy_GrottaContinenza_R7.SG	0.000897	1.203	36571	35812	846253
Mbuti.DG	STO	Italy_GrottaContinenza_R15.SG	Italy_OrienteC	0.007483	8.129	11784	9953	244639
Mbuti.DG	STO	Italy_GrottaContinenza_R15.SG	Italy_Uzzo_EM	0.010072	12.276	31581	25111	642329
Mbuti.DG	STO	Italy_GrottaContinenza_R15.SG	Italy_Villabruna	-0.004558	-5.447	32378	35687	725893
Mbuti.DG	STO	Italy_GrottaContinenza_R15.SG	RIP	-0.005443	-6.439	17575	19799	408623
Mbuti.DG	STO	Italy_GrottaContinenza_R15.SG	PRD	-0.010931	-11.717	8152	10290	195599
Mbuti.DG	STO	Italy_GrottaContinenza_R7.SG	Italy_OrienteC	0.006582	7.052	11691	10078	245131
Mbuti.DG	STO	Italy_GrottaContinenza_R7.SG	Italy_Uzzo_EM	0.009051	10.712	31141	25316	643627
Mbuti.DG	STO	Italy_GrottaContinenza_R7.SG	Italy_Villabruna	-0.005149	-6.169	31924	35669	727212
Mbuti.DG	STO	Italy_GrottaContinenza_R7.SG	RIP	-0.006625	-7.159	17346	20057	409188
Mbuti.DG	STO	Italy_GrottaContinenza_R7.SG	PRD	-0.011447	-12.317	8029	10271	195887
Mbuti.DG	STO	Italy_OrienteC	Italy_Uzzo_EM	0.002396	2.955	7584	7081	209902
Mbuti.DG	STO	Italy_OrienteC	Italy_Villabruna	-0.011291	-11.229	9623	12285	235787
Mbuti.DG	STO	Italy_OrienteC	RIP	-0.012803	-11.579	5422	7183	137557
Mbuti.DG	STO	Italy_OrienteC	PRD	-0.018312	-14.93	2618	3873	68546
Mbuti.DG	STO	Italy_Uzzo_EM	Italy_Villabruna	-0.014109	-15.549	23153	31459	588687
Mbuti.DG	STO	Italy_Uzzo_EM	RIP	-0.015178	-15.988	13098	18317	343835
Mbuti.DG	STO	Italy_Uzzo_EM	PRD	-0.020719	-20.035	6185	9650	167254
Mbuti.DG	STO	Italy_Villabruna	RIP	-0.000852	-0.907	17236	17559	379771
Mbuti.DG	STO	Italy_Villabruna	PRD	-0.00675	-7.176	8156	9401	184422
Mbuti.DG	STO	RIP	PRD	-0.004957	-4.699	4956	5510	111952
Mbuti.DG	Italy_Villabruna	AC16	Italy_GrottaContinenza_R11.SG	-0.001321	-1.694	18897	19481	441993
Mbuti.DG	Italy_Villabruna	AC16	Italy_GrottaContinenza_R15.SG	-0.001366	-1.96	27880	28781	660111
Mbuti.DG	Italy_Villabruna	AC16	Italy_GrottaContinenza_R7.SG	-0.000799	-1.108	28115	28644	661067
Mbuti.DG	Italy_Villabruna	AC16	Italy_OrienteC	0.000499	0.583	9602	9493	218363
Mbuti.DG	Italy_Villabruna	AC16	Italy_Uzzo_EM	0.00056	0.771	23791	23479	559241
Mbuti.DG	Italy_Villabruna	AC16	STO	-0.00021	-0.286	26090	26217	606794
Mbuti.DG	Italy_Villabruna	AC16	RIP	-0.000383	-0.47	16014	16151	358788
Mbuti.DG	Italy_Villabruna	AC16	PRD	-0.006775	-7.133	7620	8810	175628
Mbuti.DG	Italy_Villabruna	Italy_GrottaContinenza_R11.SG	Italy_GrottaContinenza_R15.SG	-0.000221	-0.318	23271	23391	542906
Mbuti.DG	Italy_Villabruna	Italy_GrottaContinenza_R11.SG	Italy_GrottaContinenza_R7.SG	0.000521	0.761	22666	22383	543974
Mbuti.DG	Italy_Villabruna	Italy_GrottaContinenza_R11.SG	Italy_OrienteC	0.000891	0.993	7445	7296	166887
Mbuti.DG	Italy_Villabruna	Italy_GrottaContinenza_R11.SG	Italy_Uzzo_EM	0.002027	2.747	18798	17933	426830
Mbuti.DG	Italy_Villabruna	Italy_GrottaContinenza_R11.SG	STO	0.00116	1.495	21615	21048	488716
Mbuti.DG	Italy_Villabruna	Italy_GrottaContinenza_R11.SG	RIP	0.001208	1.44	12673	12343	273689
Mbuti.DG	Italy_Villabruna	Italy_GrottaContinenza_R11.SG	PRD	-0.005844	-6.078	5803	6575	132104
Mbuti.DG	Italy_Villabruna	Italy_GrottaContinenza_R15.SG	Italy_GrottaContinenza_R7.SG	0.000525	0.834	34198	33772	811148
Mbuti.DG	Italy_Villabruna	Italy_GrottaContinenza_R15.SG	Italy_OrienteC	0.001168	1.394	11056	10766	248862
Mbuti.DG	Italy_Villabruna	Italy_GrottaContinenza_R15.SG	Italy_Uzzo_EM	0.001481	2.178	27774	26831	636401
Mbuti.DG	Italy_Villabruna	Italy_GrottaContinenza_R15.SG	STO	0.001117	1.521	32378	31567	725893
Mbuti.DG	Italy_Villabruna	Italy_GrottaContinenza_R15.SG	RIP	0.000787	1.028	18729	18407	409614
Mbuti.DG	Italy_Villabruna	Italy_GrottaContinenza_R15.SG	PRD	-0.005284	-5.713	8657	9699	197349
Mbuti.DG	Italy_Villabruna	Italy_GrottaContinenza_R7.SG	Italy_OrienteC	0.000237	0.288	10884	10825	249279
Mbuti.DG	Italy_Villabruna	Italy_GrottaContinenza_R7.SG	Italy_Uzzo_EM	0.001089	1.525	27548	26854	637350
Mbuti.DG	Italy_Villabruna	Italy_GrottaContinenza_R7.SG	STO	0.00068	0.923	31924	31429	727212
Mbuti.DG	Italy_Villabruna	Italy_GrottaContinenza_R7.SG	RIP	0.000784	0.953	18661	18340	410033
Mbuti.DG	Italy_Villabruna	Italy_GrottaContinenza_R7.SG	PRD	-0.00627	-6.89	8537	9775	197532
Mbuti.DG	Italy_Villabruna	Italy_OrienteC	Italy_Uzzo_EM	0.000625	0.833	7412	7278	214851
Mbuti.DG	Italy_Villabruna	Italy_OrienteC	STO	0.000523	0.615	9623	9499	235787
Mbuti.DG	Italy_Villabruna	Italy_OrienteC	RIP	-5.8e-05	-0.058	6460	6468	141455
Mbuti.DG	Italy_Villabruna	Italy_OrienteC	PRD	-0.007386	-5.768	3040	3561	70540
Mbuti.DG	Italy_Villabruna	Italy_Uzzo_EM	STO	-0.000358	-0.51	23153	23364	588687
Mbuti.DG	Italy_Villabruna	Italy_Uzzo_EM	RIP	-0.000815	-0.976	15521	15805	348924
Mbuti.DG	Italy_Villabruna	Italy_Uzzo_EM	PRD	-0.007724	-8.183	7201	8518	170497
Mbuti.DG	Italy_Villabruna	STO	RIP	-0.000207	-0.244	17481	17559	379771
Mbuti.DG	Italy_Villabruna	STO	PRD	-0.006865	-7.322	8135	9401	184422
Mbuti.DG	Italy_Villabruna	RIP	PRD	-0.006726	-6.375	4959	5731	114774
Mbuti.DG	RIP	AC16	Italy_GrottaContinenza_R11.SG	-0.001459	-1.826	10896	11272	257700
Mbuti.DG	RIP	AC16	Italy_GrottaContinenza_R15.SG	-0.000665	-0.895	16366	16622	385039
Mbuti.DG	RIP	AC16	Italy_GrottaContinenza_R7.SG	-0.000713	-0.945	16431	16705	385541
Mbuti.DG	RIP	AC16	Italy_OrienteC	-0.001362	-1.458	5576	5754	130602
Mbuti.DG	RIP	AC16	Italy_Uzzo_EM	-0.000378	-0.502	14121	14248	335233
Mbuti.DG	RIP	AC16	STO	-0.002109	-2.761	14779	15526	354088
Mbuti.DG	RIP	AC16	Italy_Villabruna	-0.001443	-1.801	16014	16532	358788
Mbuti.DG	RIP	AC16	PRD	-0.00663	-6.441	4737	5464	109678
Mbuti.DG	RIP	Italy_GrottaContinenza_R11.SG	Italy_GrottaContinenza_R15.SG	0.000531	0.733	13131	12969	305118
Mbuti.DG	RIP	Italy_GrottaContinenza_R11.SG	Italy_GrottaContinenza_R7.SG	0.000476	0.636	12688	12542	305561
Mbuti.DG	RIP	Italy_GrottaContinenza_R11.SG	Italy_OrienteC	0.000814	0.792	4246	4167	96843
Mbuti.DG	RIP	Italy_GrottaContinenza_R11.SG	Italy_Uzzo_EM	0.001545	1.922	10876	10492	248584
Mbuti.DG	RIP	Italy_GrottaContinenza_R11.SG	STO	-0.001312	-1.591	11764	12124	274520
Mbuti.DG	RIP	Italy_GrottaContinenza_R11.SG	Italy_Villabruna	-9e-05	-0.103	12673	12698	273689
Mbuti.DG	RIP	Italy_GrottaContinenza_R11.SG	PRD	-0.005214	-4.557	3477	3894	79924
Mbuti.DG	RIP	Italy_GrottaContinenza_R15.SG	Italy_GrottaContinenza_R7.SG	0.000146	0.205	19213	19147	456395
Mbuti.DG	RIP	Italy_GrottaContinenza_R15.SG	Italy_OrienteC	-0.000864	-0.927	6188	6313	144522
Mbuti.DG	RIP	Italy_GrottaContinenza_R15.SG	Italy_Uzzo_EM	0.000594	0.793	15937	15717	371061
Mbuti.DG	RIP	Italy_GrottaContinenza_R15.SG	STO	-0.001503	-1.889	17575	18189	408623
Mbuti.DG	RIP	Italy_GrottaContinenza_R15.SG	Italy_Villabruna	-0.001062	-1.308	18729	19164	409614
Mbuti.DG	RIP	Italy_GrottaContinenza_R15.SG	PRD	-0.006312	-6.35	5146	5899	119354
Mbuti.DG	RIP	Italy_GrottaContinenza_R7.SG	Italy_OrienteC	-0.001253	-1.363	6133	6314	144661
Mbuti.DG	RIP	Italy_GrottaContinenza_R7.SG	Italy_Uzzo_EM	0.000447	0.576	15861	15695	371498
Mbuti.DG	RIP	Italy_GrottaContinenza_R7.SG	STO	-0.002011	-2.562	17346	18168	409188
Mbuti.DG	RIP	Italy_GrottaContinenza_R7.SG	Italy_Villabruna	-0.000913	-1.092	18661	19035	410033
Mbuti.DG	RIP	Italy_GrottaContinenza_R7.SG	PRD	-0.005421	-5.372	5170	5817	119381
Mbuti.DG	RIP	Italy_OrienteC	Italy_Uzzo_EM	0.000822	1.053	4402	4297	128705
Mbuti.DG	RIP	Italy_OrienteC	STO	-0.000227	-0.251	5422	5453	137557
Mbuti.DG	RIP	Italy_OrienteC	Italy_Villabruna	0.000627	0.627	6460	6371	141455
Mbuti.DG	RIP	Italy_OrienteC	PRD	-0.006046	-4.264	1904	2171	44241
Mbuti.DG	RIP	Italy_Uzzo_EM	STO	-0.002106	-2.99	13098	13822	343835
Mbuti.DG	RIP	Italy_Uzzo_EM	Italy_Villabruna	-0.001526	-1.818	15521	16053	348924
Mbuti.DG	RIP	Italy_Uzzo_EM	PRD	-0.006738	-6.677	4515	5235	106721
Mbuti.DG	RIP	STO	Italy_Villabruna	0.000645	0.74	17481	17236	379771
Mbuti.DG	RIP	STO	PRD	-0.004077	-3.987	5054	5510	111952
Mbuti.DG	RIP	Italy_Villabruna	PRD	-0.005481	-5.061	5102	5731	114774
Mbuti.DG	PRD	AC16	Italy_GrottaContinenza_R11.SG	-0.000403	-0.435	5162	5212	124325
Mbuti.DG	PRD	AC16	Italy_GrottaContinenza_R15.SG	0.000105	0.126	7712	7693	185827
Mbuti.DG	PRD	AC16	Italy_GrottaContinenza_R7.SG	0.000545	0.68	7714	7612	186048
Mbuti.DG	PRD	AC16	Italy_OrienteC	0.00029	0.258	2746	2727	65487
Mbuti.DG	PRD	AC16	Italy_Uzzo_EM	0.000545	0.68	6645	6556	164061
Mbuti.DG	PRD	AC16	STO	-0.001531	-1.894	6971	7234	172400
Mbuti.DG	PRD	AC16	Italy_Villabruna	-0.001222	-1.411	7620	7835	175628
Mbuti.DG	PRD	AC16	RIP	-4.6e-05	-0.048	4737	4742	109678
Mbuti.DG	PRD	Italy_GrottaContinenza_R11.SG	Italy_GrottaContinenza_R15.SG	0.000386	0.431	6084	6029	144259
Mbuti.DG	PRD	Italy_GrottaContinenza_R11.SG	Italy_GrottaContinenza_R7.SG	0.00017	0.206	5792	5768	144495
Mbuti.DG	PRD	Italy_GrottaContinenza_R11.SG	Italy_OrienteC	-0.000345	-0.273	2017	2033	48014
Mbuti.DG	PRD	Italy_GrottaContinenza_R11.SG	Italy_Uzzo_EM	0.001033	1.132	5051	4927	120033
Mbuti.DG	PRD	Italy_GrottaContinenza_R11.SG	STO	-0.001195	-1.332	5525	5682	131510
Mbuti.DG	PRD	Italy_GrottaContinenza_R11.SG	Italy_Villabruna	-0.001314	-1.437	5803	5977	132104
Mbuti.DG	PRD	Italy_GrottaContinenza_R11.SG	RIP	-0.000897	-0.772	3477	3549	79924
Mbuti.DG	PRD	Italy_GrottaContinenza_R15.SG	Italy_GrottaContinenza_R7.SG	0.000461	0.604	8819	8720	215578
Mbuti.DG	PRD	Italy_GrottaContinenza_R15.SG	Italy_OrienteC	0.000846	0.781	3030	2969	71549
Mbuti.DG	PRD	Italy_GrottaContinenza_R15.SG	Italy_Uzzo_EM	0.000706	0.882	7500	7374	178984
Mbuti.DG	PRD	Italy_GrottaContinenza_R15.SG	STO	-0.001522	-1.847	8152	8450	195599
Mbuti.DG	PRD	Italy_GrottaContinenza_R15.SG	Italy_Villabruna	-0.001953	-2.236	8657	9042	197349
Mbuti.DG	PRD	Italy_GrottaContinenza_R15.SG	RIP	-0.000668	-0.696	5146	5226	119354
Mbuti.DG	PRD	Italy_GrottaContinenza_R7.SG	Italy_OrienteC	-0.001652	-1.475	2938	3057	71638
Mbuti.DG	PRD	Italy_GrottaContinenza_R7.SG	Italy_Uzzo_EM	0.000317	0.39	7384	7327	179130
Mbuti.DG	PRD	Italy_GrottaContinenza_R7.SG	STO	-0.002028	-2.511	8029	8426	195887
Mbuti.DG	PRD	Italy_GrottaContinenza_R7.SG	Italy_Villabruna	-0.002153	-2.645	8537	8962	197532
Mbuti.DG	PRD	Italy_GrottaContinenza_R7.SG	RIP	-0.001379	-1.419	5170	5334	119381
Mbuti.DG	PRD	Italy_OrienteC	Italy_Uzzo_EM	0.001337	1.383	2141	2055	64369
Mbuti.DG	PRD	Italy_OrienteC	STO	-0.000336	-0.323	2618	2641	68546
Mbuti.DG	PRD	Italy_OrienteC	Italy_Villabruna	-0.001204	-1.114	3040	3125	70540
Mbuti.DG	PRD	Italy_OrienteC	RIP	-0.000659	-0.503	1904	1933	44241
Mbuti.DG	PRD	Italy_Uzzo_EM	STO	-0.002315	-2.991	6185	6572	167254
Mbuti.DG	PRD	Italy_Uzzo_EM	Italy_Villabruna	-0.002682	-3.074	7201	7658	170497
Mbuti.DG	PRD	Italy_Uzzo_EM	RIP	-0.001393	-1.52	4515	4664	106721
Mbuti.DG	PRD	STO	Italy_Villabruna	-0.000115	-0.134	8135	8156	184422
Mbuti.DG	PRD	STO	RIP	0.000879	0.867	5054	4956	111952
Mbuti.DG	PRD	Italy_Villabruna	RIP	0.001244	1.309	5102	4959	114774
Mbuti.DG	AC16	Italy_GrottaContinenza_R11.SG	RIP.pmd	-0.004152	-3.742	4435	4861	102591
Mbuti.DG	AC16	Italy_GrottaContinenza_R11.SG	PRD.pmd	-0.009906	-7.912	2632	3275	64849
Mbuti.DG	AC16	Italy_GrottaContinenza_R15.SG	RIP.pmd	-0.004285	-4.321	6543	7201	153595
Mbuti.DG	AC16	Italy_GrottaContinenza_R15.SG	PRD.pmd	-0.010216	-9.321	3933	4922	96845
Mbuti.DG	AC16	Italy_GrottaContinenza_R7.SG	RIP.pmd	-0.004602	-4.599	6450	7157	153740
Mbuti.DG	AC16	Italy_GrottaContinenza_R7.SG	PRD.pmd	-0.010883	-9.755	3873	4928	96999
Mbuti.DG	AC16	Italy_OrienteC	RIP.pmd	-0.002474	-1.868	2359	2494	54741
Mbuti.DG	AC16	Italy_OrienteC	PRD.pmd	-0.009761	-6.233	1374	1715	34906
Mbuti.DG	AC16	Italy_Uzzo_EM	RIP.pmd	-0.005876	-5.879	5614	6416	136522
Mbuti.DG	AC16	Italy_Uzzo_EM	PRD.pmd	-0.011864	-10.791	3358	4382	86287
Mbuti.DG	AC16	STO	RIP.pmd	-0.004487	-4.303	6078	6719	142787
Mbuti.DG	AC16	STO	PRD.pmd	-0.010052	-8.718	3747	4655	90326
Mbuti.DG	AC16	Italy_Villabruna	RIP.pmd	0.001002	1.058	6566	6420	145894
Mbuti.DG	AC16	Italy_Villabruna	PRD.pmd	-0.004292	-3.756	4038	4434	92339
Mbuti.DG	AC16	RIP	RIP.pmd	4.8e-05	0.19	1067	1059	159180
Mbuti.DG	AC16	RIP	PRD.pmd	-0.004819	-3.788	2438	2718	58135
Mbuti.DG	AC16	RIP.pmd	PRD	-0.007629	-5.536	1914	2271	46732
Mbuti.DG	AC16	RIP.pmd	PRD.pmd	-0.00676	-3.957	984	1155	25289
Mbuti.DG	AC16	PRD	PRD.pmd	0.000257	1.244	298	272	100313
Mbuti.DG	Italy_GrottaContinenza_R11.SG	AC16	RIP.pmd	-0.005762	-5.18	4270	4861	102591
Mbuti.DG	Italy_GrottaContinenza_R11.SG	AC16	PRD.pmd	-0.009832	-7.887	2637	3275	64849
Mbuti.DG	Italy_GrottaContinenza_R11.SG	Italy_GrottaContinenza_R15.SG	RIP.pmd	-0.005998	-5.625	4963	5672	118308
Mbuti.DG	Italy_GrottaContinenza_R11.SG	Italy_GrottaContinenza_R15.SG	PRD.pmd	-0.00984	-8.669	3081	3813	74446
Mbuti.DG	Italy_GrottaContinenza_R11.SG	Italy_GrottaContinenza_R7.SG	RIP.pmd	-0.009734	-9.186	4726	5879	118433
Mbuti.DG	Italy_GrottaContinenza_R11.SG	Italy_GrottaContinenza_R7.SG	PRD.pmd	-0.013275	-11.59	2923	3914	74652
Mbuti.DG	Italy_GrottaContinenza_R11.SG	Italy_OrienteC	RIP.pmd	-0.004099	-2.946	1677	1840	39872
Mbuti.DG	Italy_GrottaContinenza_R11.SG	Italy_OrienteC	PRD.pmd	-0.008919	-5.112	1038	1266	25564
Mbuti.DG	Italy_GrottaContinenza_R11.SG	Italy_Uzzo_EM	RIP.pmd	-0.006308	-5.916	4037	4663	99223
Mbuti.DG	Italy_GrottaContinenza_R11.SG	Italy_Uzzo_EM	PRD.pmd	-0.01055	-8.687	2509	3171	62792
Mbuti.DG	Italy_GrottaContinenza_R11.SG	STO	RIP.pmd	-0.003915	-3.748	4670	5093	107883
Mbuti.DG	Italy_GrottaContinenza_R11.SG	STO	PRD.pmd	-0.008067	-6.663	2898	3449	68296
Mbuti.DG	Italy_GrottaContinenza_R11.SG	Italy_Villabruna	RIP.pmd	0.001392	1.336	4936	4785	108842
Mbuti.DG	Italy_GrottaContinenza_R11.SG	Italy_Villabruna	PRD.pmd	-0.002961	-2.507	3058	3263	69073
Mbuti.DG	Italy_GrottaContinenza_R11.SG	RIP	RIP.pmd	-0.000434	-1.536	727	779	121646
Mbuti.DG	Italy_GrottaContinenza_R11.SG	RIP	PRD.pmd	-0.001649	-1.182	1844	1913	42054
Mbuti.DG	Italy_GrottaContinenza_R11.SG	RIP.pmd	PRD	-0.004512	-2.855	1448	1598	33450
Mbuti.DG	Italy_GrottaContinenza_R11.SG	RIP.pmd	PRD.pmd	-0.00262	-1.38	746	793	18003
Mbuti.DG	Italy_GrottaContinenza_R11.SG	PRD	PRD.pmd	0.000489	2.295	216	178	76593
Mbuti.DG	Italy_GrottaContinenza_R15.SG	AC16	RIP.pmd	-0.005315	-5.516	6385	7201	153595
Mbuti.DG	Italy_GrottaContinenza_R15.SG	AC16	PRD.pmd	-0.01103	-10.129	3854	4922	96845
Mbuti.DG	Italy_GrottaContinenza_R15.SG	Italy_GrottaContinenza_R11.SG	RIP.pmd	-0.005801	-5.638	4986	5672	118308
Mbuti.DG	Italy_GrottaContinenza_R15.SG	Italy_GrottaContinenza_R11.SG	PRD.pmd	-0.010526	-8.766	3030	3813	74446
Mbuti.DG	Italy_GrottaContinenza_R15.SG	Italy_GrottaContinenza_R7.SG	RIP.pmd	-0.008171	-8.822	7202	8650	177238
Mbuti.DG	Italy_GrottaContinenza_R15.SG	Italy_GrottaContinenza_R7.SG	PRD.pmd	-0.013207	-12.533	4337	5807	111276
Mbuti.DG	Italy_GrottaContinenza_R15.SG	Italy_OrienteC	RIP.pmd	-0.004869	-4.084	2502	2793	59609
Mbuti.DG	Italy_GrottaContinenza_R15.SG	Italy_OrienteC	PRD.pmd	-0.011015	-7.298	1507	1924	37842
Mbuti.DG	Italy_GrottaContinenza_R15.SG	Italy_Uzzo_EM	RIP.pmd	-0.00583	-6.157	6082	6948	148519
Mbuti.DG	Italy_GrottaContinenza_R15.SG	Italy_Uzzo_EM	PRD.pmd	-0.010413	-9.764	3716	4691	93603
Mbuti.DG	Italy_GrottaContinenza_R15.SG	STO	RIP.pmd	-0.003927	-4.2	6930	7562	160978
Mbuti.DG	Italy_GrottaContinenza_R15.SG	STO	PRD.pmd	-0.008574	-8.009	4265	5136	101547
Mbuti.DG	Italy_GrottaContinenza_R15.SG	Italy_Villabruna	RIP.pmd	0.001179	1.282	7378	7185	163186
Mbuti.DG	Italy_GrottaContinenza_R15.SG	Italy_Villabruna	PRD.pmd	-0.002756	-2.583	4555	4839	103047
Mbuti.DG	Italy_GrottaContinenza_R15.SG	RIP	RIP.pmd	-6.7e-05	-0.314	1126	1138	182331
Mbuti.DG	Italy_GrottaContinenza_R15.SG	RIP	PRD.pmd	-0.004441	-3.707	2670	2949	62877
Mbuti.DG	Italy_GrottaContinenza_R15.SG	RIP.pmd	PRD	-0.005108	-3.976	2119	2374	49996
Mbuti.DG	Italy_GrottaContinenza_R15.SG	RIP.pmd	PRD.pmd	-0.003569	-2.2	1102	1197	26897
Mbuti.DG	Italy_GrottaContinenza_R15.SG	PRD	PRD.pmd	0.000177	0.993	304	284	114443
Mbuti.DG	Italy_GrottaContinenza_R7.SG	AC16	RIP.pmd	-0.005209	-5.441	6356	7157	153740
Mbuti.DG	Italy_GrottaContinenza_R7.SG	AC16	PRD.pmd	-0.011007	-10.227	3861	4928	96999
Mbuti.DG	Italy_GrottaContinenza_R7.SG	Italy_GrottaContinenza_R11.SG	RIP.pmd	-0.00878	-8.294	4839	5879	118433
Mbuti.DG	Italy_GrottaContinenza_R7.SG	Italy_GrottaContinenza_R11.SG	PRD.pmd	-0.013892	-11.697	2877	3914	74652
Mbuti.DG	Italy_GrottaContinenza_R7.SG	Italy_GrottaContinenza_R15.SG	RIP.pmd	-0.007167	-7.527	7379	8650	177238
Mbuti.DG	Italy_GrottaContinenza_R7.SG	Italy_GrottaContinenza_R15.SG	PRD.pmd	-0.012555	-12.099	4410	5807	111276
Mbuti.DG	Italy_GrottaContinenza_R7.SG	Italy_OrienteC	RIP.pmd	-0.003282	-2.529	2542	2737	59660
Mbuti.DG	Italy_GrottaContinenza_R7.SG	Italy_OrienteC	PRD.pmd	-0.008644	-5.65	1558	1885	37932
Mbuti.DG	Italy_GrottaContinenza_R7.SG	Italy_Uzzo_EM	RIP.pmd	-0.005989	-6.419	6075	6965	148603
Mbuti.DG	Italy_GrottaContinenza_R7.SG	Italy_Uzzo_EM	PRD.pmd	-0.01058	-9.823	3687	4679	93686
Mbuti.DG	Italy_GrottaContinenza_R7.SG	STO	RIP.pmd	-0.004165	-4.2	6989	7661	161159
Mbuti.DG	Italy_GrottaContinenza_R7.SG	STO	PRD.pmd	-0.008773	-8.031	4260	5153	101770
Mbuti.DG	Italy_GrottaContinenza_R7.SG	Italy_Villabruna	RIP.pmd	0.001976	2.135	7402	7079	163362
Mbuti.DG	Italy_GrottaContinenza_R7.SG	Italy_Villabruna	PRD.pmd	-0.003496	-3.26	4516	4877	103203
Mbuti.DG	Italy_GrottaContinenza_R7.SG	RIP	RIP.pmd	0.00011	0.489	1131	1111	182556
Mbuti.DG	Italy_GrottaContinenza_R7.SG	RIP	PRD.pmd	-0.002159	-1.807	2750	2886	62907
Mbuti.DG	Italy_GrottaContinenza_R7.SG	RIP.pmd	PRD	-0.005368	-3.959	2133	2401	49975
Mbuti.DG	Italy_GrottaContinenza_R7.SG	RIP.pmd	PRD.pmd	-0.003295	-1.945	1100	1189	26897
Mbuti.DG	Italy_GrottaContinenza_R7.SG	PRD	PRD.pmd	5.1e-05	0.276	312	306	114646
Mbuti.DG	Italy_OrienteC	AC16	RIP.pmd	-0.003515	-2.646	2302	2494	54741
Mbuti.DG	Italy_OrienteC	AC16	PRD.pmd	-0.008181	-5.359	1429	1715	34906
Mbuti.DG	Italy_OrienteC	Italy_GrottaContinenza_R11.SG	RIP.pmd	-0.003893	-2.76	1685	1840	39872
Mbuti.DG	Italy_OrienteC	Italy_GrottaContinenza_R11.SG	PRD.pmd	-0.009093	-5.153	1034	1266	25564
Mbuti.DG	Italy_OrienteC	Italy_GrottaContinenza_R15.SG	RIP.pmd	-0.004699	-3.674	2512	2793	59609
Mbuti.DG	Italy_OrienteC	Italy_GrottaContinenza_R15.SG	PRD.pmd	-0.008892	-5.996	1587	1924	37842
Mbuti.DG	Italy_OrienteC	Italy_GrottaContinenza_R7.SG	RIP.pmd	-0.00561	-4.451	2403	2737	59660
Mbuti.DG	Italy_OrienteC	Italy_GrottaContinenza_R7.SG	PRD.pmd	-0.009602	-6.452	1521	1885	37932
Mbuti.DG	Italy_OrienteC	Italy_Uzzo_EM	RIP.pmd	-0.02649	-18.943	1700	3130	53966
Mbuti.DG	Italy_OrienteC	Italy_Uzzo_EM	PRD.pmd	-0.029057	-18.493	1083	2082	34371
Mbuti.DG	Italy_OrienteC	STO	RIP.pmd	-0.012207	-9.232	2191	2888	57092
Mbuti.DG	Italy_OrienteC	STO	PRD.pmd	-0.016687	-10.676	1398	2005	36414
Mbuti.DG	Italy_OrienteC	Italy_Villabruna	RIP.pmd	-0.000552	-0.443	2550	2582	58971
Mbuti.DG	Italy_OrienteC	Italy_Villabruna	PRD.pmd	-0.004502	-3.021	1634	1802	37485
Mbuti.DG	Italy_OrienteC	RIP	RIP.pmd	-0.000136	-0.35	415	424	61670
Mbuti.DG	Italy_OrienteC	RIP	PRD.pmd	-0.003102	-1.702	1022	1096	23733
Mbuti.DG	Italy_OrienteC	RIP.pmd	PRD	-0.00646	-3.256	819	944	19413
Mbuti.DG	Italy_OrienteC	RIP.pmd	PRD.pmd	-0.004223	-1.675	437	482	10665
Mbuti.DG	Italy_OrienteC	PRD	PRD.pmd	1.3e-05	0.042	114	114	39162
Mbuti.DG	Italy_Uzzo_EM	AC16	RIP.pmd	-0.00636	-6.359	5548	6416	136522
Mbuti.DG	Italy_Uzzo_EM	AC16	PRD.pmd	-0.011357	-10.476	3402	4382	86287
Mbuti.DG	Italy_Uzzo_EM	Italy_GrottaContinenza_R11.SG	RIP.pmd	-0.005066	-4.741	4160	4663	99223
Mbuti.DG	Italy_Uzzo_EM	Italy_GrottaContinenza_R11.SG	PRD.pmd	-0.009932	-8.195	2547	3171	62792
Mbuti.DG	Italy_Uzzo_EM	Italy_GrottaContinenza_R15.SG	RIP.pmd	-0.004511	-4.543	6278	6948	148519
Mbuti.DG	Italy_Uzzo_EM	Italy_GrottaContinenza_R15.SG	PRD.pmd	-0.009439	-8.808	3807	4691	93603
Mbuti.DG	Italy_Uzzo_EM	Italy_GrottaContinenza_R7.SG	RIP.pmd	-0.006034	-6.226	6068	6965	148603
Mbuti.DG	Italy_Uzzo_EM	Italy_GrottaContinenza_R7.SG	PRD.pmd	-0.010023	-9.475	3740	4679	93686
Mbuti.DG	Italy_Uzzo_EM	Italy_OrienteC	RIP.pmd	-0.024859	-18.117	1788	3130	53966
Mbuti.DG	Italy_Uzzo_EM	Italy_OrienteC	PRD.pmd	-0.028912	-18.213	1088	2082	34371
Mbuti.DG	Italy_Uzzo_EM	STO	RIP.pmd	-0.01271	-12.031	5412	7179	138989
Mbuti.DG	Italy_Uzzo_EM	STO	PRD.pmd	-0.017373	-14.987	3395	4921	87826
Mbuti.DG	Italy_Uzzo_EM	Italy_Villabruna	RIP.pmd	0.000832	0.844	6363	6245	141991
Mbuti.DG	Italy_Uzzo_EM	Italy_Villabruna	PRD.pmd	-0.004078	-3.706	3930	4296	89753
Mbuti.DG	Italy_Uzzo_EM	RIP	RIP.pmd	-0.000147	-0.595	999	1021	153850
Mbuti.DG	Italy_Uzzo_EM	RIP	PRD.pmd	-0.004781	-3.964	2402	2673	56773
Mbuti.DG	Italy_Uzzo_EM	RIP.pmd	PRD	-0.005146	-4.016	1919	2153	45573
Mbuti.DG	Italy_Uzzo_EM	RIP.pmd	PRD.pmd	-0.00376	-2.298	1001	1094	24710
Mbuti.DG	Italy_Uzzo_EM	PRD	PRD.pmd	-5.3e-05	-0.254	279	284	96846
Mbuti.DG	STO	AC16	RIP.pmd	-0.006531	-6.161	5787	6719	142787
Mbuti.DG	STO	AC16	PRD.pmd	-0.012616	-11.348	3516	4655	90326
Mbuti.DG	STO	Italy_GrottaContinenza_R11.SG	RIP.pmd	-0.005171	-4.806	4535	5093	107883
Mbuti.DG	STO	Italy_GrottaContinenza_R11.SG	PRD.pmd	-0.01024	-8.352	2749	3449	68296
Mbuti.DG	STO	Italy_GrottaContinenza_R15.SG	RIP.pmd	-0.004701	-4.727	6805	7562	160978
Mbuti.DG	STO	Italy_GrottaContinenza_R15.SG	PRD.pmd	-0.010306	-9.517	4090	5136	101547
Mbuti.DG	STO	Italy_GrottaContinenza_R7.SG	RIP.pmd	-0.006788	-6.517	6567	7661	161159
Mbuti.DG	STO	Italy_GrottaContinenza_R7.SG	PRD.pmd	-0.011133	-10.332	4020	5153	101770
Mbuti.DG	STO	Italy_OrienteC	RIP.pmd	-0.012365	-9.168	2182	2888	57092
Mbuti.DG	STO	Italy_OrienteC	PRD.pmd	-0.018937	-12.49	1316	2005	36414
Mbuti.DG	STO	Italy_Uzzo_EM	RIP.pmd	-0.01497	-13.498	5098	7179	138989
Mbuti.DG	STO	Italy_Uzzo_EM	PRD.pmd	-0.020395	-17.46	3129	4921	87826
Mbuti.DG	STO	Italy_Villabruna	RIP.pmd	-0.000843	-0.783	6718	6847	152573
Mbuti.DG	STO	Italy_Villabruna	PRD.pmd	-0.006816	-6.264	4127	4786	96676
Mbuti.DG	STO	RIP	RIP.pmd	1.7e-05	0.075	1048	1045	166713
Mbuti.DG	STO	RIP	PRD.pmd	-0.004701	-3.733	2514	2792	59213
Mbuti.DG	STO	RIP.pmd	PRD	-0.005017	-3.731	2019	2256	47276
Mbuti.DG	STO	RIP.pmd	PRD.pmd	-0.005322	-3.228	1029	1165	25509
Mbuti.DG	STO	PRD	PRD.pmd	-5.1e-05	-0.256	285	291	105116
Mbuti.DG	Italy_Villabruna	AC16	RIP.pmd	-0.000563	-0.577	6338	6420	145894
Mbuti.DG	Italy_Villabruna	AC16	PRD.pmd	-0.005923	-5.513	3887	4434	92339
Mbuti.DG	Italy_Villabruna	Italy_GrottaContinenza_R11.SG	RIP.pmd	0.001274	1.215	4923	4785	108842
Mbuti.DG	Italy_Villabruna	Italy_GrottaContinenza_R11.SG	PRD.pmd	-0.004045	-3.513	2983	3263	69073
Mbuti.DG	Italy_Villabruna	Italy_GrottaContinenza_R15.SG	RIP.pmd	0.000691	0.755	7298	7185	163186
Mbuti.DG	Italy_Villabruna	Italy_GrottaContinenza_R15.SG	PRD.pmd	-0.004102	-3.889	4416	4839	103047
Mbuti.DG	Italy_Villabruna	Italy_GrottaContinenza_R7.SG	RIP.pmd	0.000456	0.493	7154	7079	163362
Mbuti.DG	Italy_Villabruna	Italy_GrottaContinenza_R7.SG	PRD.pmd	-0.005271	-5.037	4333	4877	103203
Mbuti.DG	Italy_Villabruna	Italy_OrienteC	RIP.pmd	0.000837	0.667	2632	2582	58971
Mbuti.DG	Italy_Villabruna	Italy_OrienteC	PRD.pmd	-0.00673	-4.296	1550	1802	37485
Mbuti.DG	Italy_Villabruna	Italy_Uzzo_EM	RIP.pmd	-0.001017	-1.069	6101	6245	141991
Mbuti.DG	Italy_Villabruna	Italy_Uzzo_EM	PRD.pmd	-0.006702	-6.159	3694	4296	89753
Mbuti.DG	Italy_Villabruna	STO	RIP.pmd	-0.000137	-0.139	6826	6847	152573
Mbuti.DG	Italy_Villabruna	STO	PRD.pmd	-0.006174	-5.687	4190	4786	96676
Mbuti.DG	Italy_Villabruna	RIP	RIP.pmd	-0.00021	-0.896	1057	1093	169091
Mbuti.DG	Italy_Villabruna	RIP	PRD.pmd	-0.005947	-4.827	2561	2923	60893
Mbuti.DG	Italy_Villabruna	RIP.pmd	PRD	-0.007905	-5.859	2010	2395	48709
Mbuti.DG	Italy_Villabruna	RIP.pmd	PRD.pmd	-0.006695	-4.124	1042	1218	26381
Mbuti.DG	Italy_Villabruna	PRD	PRD.pmd	0.000176	0.917	311	292	106704
Mbuti.DG	RIP	AC16	RIP.pmd	0.082251	95.84	14152	1059	159180
Mbuti.DG	RIP	AC16	PRD.pmd	-0.005112	-4.185	2421	2718	58135
Mbuti.DG	RIP	Italy_GrottaContinenza_R11.SG	RIP.pmd	0.0842	86.33	11022	779	121646
Mbuti.DG	RIP	Italy_GrottaContinenza_R11.SG	PRD.pmd	-0.003975	-2.819	1746	1913	42054
Mbuti.DG	RIP	Italy_GrottaContinenza_R15.SG	RIP.pmd	0.084767	98.652	16594	1138	182331
Mbuti.DG	RIP	Italy_GrottaContinenza_R15.SG	PRD.pmd	-0.005072	-4.405	2630	2949	62877
Mbuti.DG	RIP	Italy_GrottaContinenza_R7.SG	RIP.pmd	0.083788	95.815	16407	1111	182556
Mbuti.DG	RIP	Italy_GrottaContinenza_R7.SG	PRD.pmd	-0.00398	-3.379	2636	2886	62907
Mbuti.DG	RIP	Italy_OrienteC	RIP.pmd	0.08207	67.618	5485	424	61670
Mbuti.DG	RIP	Italy_OrienteC	PRD.pmd	-0.00532	-3.025	969	1096	23733
Mbuti.DG	RIP	Italy_Uzzo_EM	RIP.pmd	0.081625	91.9	13579	1021	153850
Mbuti.DG	RIP	Italy_Uzzo_EM	PRD.pmd	-0.006323	-5.305	2314	2673	56773
Mbuti.DG	RIP	STO	RIP.pmd	0.085228	95.828	15254	1045	166713
Mbuti.DG	RIP	STO	PRD.pmd	-0.003126	-2.52	2607	2792	59213
Mbuti.DG	RIP	Italy_Villabruna	RIP.pmd	0.083581	91.555	15225	1093	169091
Mbuti.DG	RIP	Italy_Villabruna	PRD.pmd	-0.005127	-4.004	2611	2923	60893
Mbuti.DG	RIP	RIP.pmd	PRD	-0.08481	-65.07	394	4783	51752
Mbuti.DG	RIP	RIP.pmd	PRD.pmd	-0.08109	-48.971	213	2470	27842
Mbuti.DG	RIP	PRD	PRD.pmd	0.000271	1.12	200	182	65058
Mbuti.DG	RIP.pmd	AC16	Italy_GrottaContinenza_R11.SG	-0.00161	-1.573	4270	4435	102591
Mbuti.DG	RIP.pmd	AC16	Italy_GrottaContinenza_R15.SG	-0.001029	-1.128	6385	6543	153595
Mbuti.DG	RIP.pmd	AC16	Italy_GrottaContinenza_R7.SG	-0.000607	-0.67	6356	6450	153740
Mbuti.DG	RIP.pmd	AC16	Italy_OrienteC	-0.001041	-0.843	2302	2359	54741
Mbuti.DG	RIP.pmd	AC16	Italy_Uzzo_EM	-0.000484	-0.545	5548	5614	136522
Mbuti.DG	RIP.pmd	AC16	STO	-0.002044	-2.434	5787	6078	142787
Mbuti.DG	RIP.pmd	AC16	Italy_Villabruna	-0.001566	-1.643	6338	6566	145894
Mbuti.DG	RIP.pmd	AC16	RIP	0.082202	95.153	14152	1067	159180
Mbuti.DG	RIP.pmd	AC16	PRD	-0.007323	-5.513	1928	2271	46732
Mbuti.DG	RIP.pmd	AC16	PRD.pmd	-0.005655	-3.344	1012	1155	25289
Mbuti.DG	RIP.pmd	Italy_GrottaContinenza_R11.SG	Italy_GrottaContinenza_R15.SG	0.000198	0.202	4986	4963	118308
Mbuti.DG	RIP.pmd	Italy_GrottaContinenza_R11.SG	Italy_GrottaContinenza_R7.SG	0.000954	0.992	4839	4726	118433
Mbuti.DG	RIP.pmd	Italy_GrottaContinenza_R11.SG	Italy_OrienteC	0.000206	0.152	1685	1677	39872
Mbuti.DG	RIP.pmd	Italy_GrottaContinenza_R11.SG	Italy_Uzzo_EM	0.001242	1.241	4160	4037	99223
Mbuti.DG	RIP.pmd	Italy_GrottaContinenza_R11.SG	STO	-0.001256	-1.279	4535	4670	107883
Mbuti.DG	RIP.pmd	Italy_GrottaContinenza_R11.SG	Italy_Villabruna	-0.000119	-0.112	4923	4936	108842
Mbuti.DG	RIP.pmd	Italy_GrottaContinenza_R11.SG	RIP	0.084633	87.601	11022	727	121646
Mbuti.DG	RIP.pmd	Italy_GrottaContinenza_R11.SG	PRD	-0.006049	-3.917	1396	1598	33450
Mbuti.DG	RIP.pmd	Italy_GrottaContinenza_R11.SG	PRD.pmd	-0.00356	-1.875	729	793	18003
Mbuti.DG	RIP.pmd	Italy_GrottaContinenza_R15.SG	Italy_GrottaContinenza_R7.SG	0.001004	1.151	7379	7202	177238
Mbuti.DG	RIP.pmd	Italy_GrottaContinenza_R15.SG	Italy_OrienteC	0.00017	0.137	2512	2502	59609
Mbuti.DG	RIP.pmd	Italy_GrottaContinenza_R15.SG	Italy_Uzzo_EM	0.001319	1.415	6278	6082	148519
Mbuti.DG	RIP.pmd	Italy_GrottaContinenza_R15.SG	STO	-0.000774	-0.841	6805	6930	160978
Mbuti.DG	RIP.pmd	Italy_GrottaContinenza_R15.SG	Italy_Villabruna	-0.000488	-0.517	7298	7378	163186
Mbuti.DG	RIP.pmd	Italy_GrottaContinenza_R15.SG	RIP	0.084834	96.596	16594	1126	182331
Mbuti.DG	RIP.pmd	Italy_GrottaContinenza_R15.SG	PRD	-0.006025	-4.703	2073	2374	49996
Mbuti.DG	RIP.pmd	Italy_GrottaContinenza_R15.SG	PRD.pmd	-0.00393	-2.497	1092	1197	26897
Mbuti.DG	RIP.pmd	Italy_GrottaContinenza_R7.SG	Italy_OrienteC	-0.002328	-1.909	2403	2542	59660
Mbuti.DG	RIP.pmd	Italy_GrottaContinenza_R7.SG	Italy_Uzzo_EM	-4.5e-05	-0.051	6068	6075	148603
Mbuti.DG	RIP.pmd	Italy_GrottaContinenza_R7.SG	STO	-0.002623	-2.952	6567	6989	161159
Mbuti.DG	RIP.pmd	Italy_GrottaContinenza_R7.SG	Italy_Villabruna	-0.001519	-1.63	7154	7402	163362
Mbuti.DG	RIP.pmd	Italy_GrottaContinenza_R7.SG	RIP	0.083678	95.215	16407	1131	182556
Mbuti.DG	RIP.pmd	Italy_GrottaContinenza_R7.SG	PRD	-0.007379	-5.768	2033	2401	49975
Mbuti.DG	RIP.pmd	Italy_GrottaContinenza_R7.SG	PRD.pmd	-0.004638	-2.955	1064	1189	26897
Mbuti.DG	RIP.pmd	Italy_OrienteC	Italy_Uzzo_EM	0.001631	1.544	1788	1700	53966
Mbuti.DG	RIP.pmd	Italy_OrienteC	STO	-0.000158	-0.135	2182	2191	57092
Mbuti.DG	RIP.pmd	Italy_OrienteC	Italy_Villabruna	0.001388	1.079	2632	2550	58971
Mbuti.DG	RIP.pmd	Italy_OrienteC	RIP	0.082206	68.011	5485	415	61670
Mbuti.DG	RIP.pmd	Italy_OrienteC	PRD	-0.006911	-3.567	810	944	19413
Mbuti.DG	RIP.pmd	Italy_OrienteC	PRD.pmd	-0.006778	-2.822	410	482	10665
Mbuti.DG	RIP.pmd	Italy_Uzzo_EM	STO	-0.002259	-2.666	5098	5412	138989
Mbuti.DG	RIP.pmd	Italy_Uzzo_EM	Italy_Villabruna	-0.001849	-1.917	6101	6363	141991
Mbuti.DG	RIP.pmd	Italy_Uzzo_EM	RIP	0.081772	91.651	13579	999	153850
Mbuti.DG	RIP.pmd	Italy_Uzzo_EM	PRD	-0.006063	-4.694	1877	2153	45573
Mbuti.DG	RIP.pmd	Italy_Uzzo_EM	PRD.pmd	-0.004082	-2.532	993	1094	24710
Mbuti.DG	RIP.pmd	STO	Italy_Villabruna	0.000706	0.729	6826	6718	152573
Mbuti.DG	RIP.pmd	STO	RIP	0.08521	94.514	15254	1048	166713
Mbuti.DG	RIP.pmd	STO	PRD	-0.004636	-3.512	2037	2256	47276
Mbuti.DG	RIP.pmd	STO	PRD.pmd	-0.002945	-1.714	1089	1165	25509
Mbuti.DG	RIP.pmd	Italy_Villabruna	RIP	0.083792	92.382	15225	1057	169091
Mbuti.DG	RIP.pmd	Italy_Villabruna	PRD	-0.006485	-4.695	2080	2395	48709
Mbuti.DG	RIP.pmd	Italy_Villabruna	PRD.pmd	-0.004587	-2.756	1097	1218	26381
Mbuti.DG	RIP.pmd	RIP	PRD	-0.085769	-67.017	344	4783	51752
Mbuti.DG	RIP.pmd	RIP	PRD.pmd	-0.082129	-49.528	184	2470	27842
Mbuti.DG	RIP.pmd	PRD	PRD.pmd	0.00022	0.568	89	82	27842
Mbuti.DG	PRD	AC16	RIP.pmd	0.000307	0.251	1928	1914	46732
Mbuti.DG	PRD	AC16	PRD.pmd	0.0938	86.888	9681	272	100313
Mbuti.DG	PRD	Italy_GrottaContinenza_R11.SG	RIP.pmd	-0.001537	-1.013	1396	1448	33450
Mbuti.DG	PRD	Italy_GrottaContinenza_R11.SG	PRD.pmd	0.094717	88.992	7433	178	76593
Mbuti.DG	PRD	Italy_GrottaContinenza_R15.SG	RIP.pmd	-0.000917	-0.718	2073	2119	49996
Mbuti.DG	PRD	Italy_GrottaContinenza_R15.SG	PRD.pmd	0.09546	92.594	11208	284	114443
Mbuti.DG	PRD	Italy_GrottaContinenza_R7.SG	RIP.pmd	-0.002011	-1.644	2033	2133	49975
Mbuti.DG	PRD	Italy_GrottaContinenza_R7.SG	PRD.pmd	0.094763	94.02	11170	306	114646
Mbuti.DG	PRD	Italy_OrienteC	RIP.pmd	-0.000451	-0.252	810	819	19413
Mbuti.DG	PRD	Italy_OrienteC	PRD.pmd	0.092038	63.588	3718	114	39162
Mbuti.DG	PRD	Italy_Uzzo_EM	RIP.pmd	-0.000917	-0.765	1877	1919	45573
Mbuti.DG	PRD	Italy_Uzzo_EM	PRD.pmd	0.09235	92.478	9228	284	96846
Mbuti.DG	PRD	STO	RIP.pmd	0.000381	0.283	2037	2019	47276
Mbuti.DG	PRD	STO	PRD.pmd	0.096197	93.041	10402	291	105116
Mbuti.DG	PRD	Italy_Villabruna	RIP.pmd	0.00142	1.149	2080	2010	48709
Mbuti.DG	PRD	Italy_Villabruna	PRD.pmd	0.095309	89.98	10462	292	106704
Mbuti.DG	PRD	RIP	RIP.pmd	-0.000959	-2.143	344	394	51752
Mbuti.DG	PRD	RIP	PRD.pmd	0.093667	78.994	6276	182	65058
Mbuti.DG	PRD	RIP.pmd	PRD.pmd	0.089839	53.96	2584	82	27842
Mbuti.DG	PRD.pmd	AC16	Italy_GrottaContinenza_R11.SG	7.3e-05	0.066	2637	2632	64849
Mbuti.DG	PRD.pmd	AC16	Italy_GrottaContinenza_R15.SG	-0.000814	-0.829	3854	3933	96845
Mbuti.DG	PRD.pmd	AC16	Italy_GrottaContinenza_R7.SG	-0.000123	-0.13	3861	3873	96999
Mbuti.DG	PRD.pmd	AC16	Italy_OrienteC	0.001579	1.075	1429	1374	34906
Mbuti.DG	PRD.pmd	AC16	Italy_Uzzo_EM	0.000507	0.531	3402	3358	86287
Mbuti.DG	PRD.pmd	AC16	STO	-0.002565	-2.616	3516	3747	90326
Mbuti.DG	PRD.pmd	AC16	Italy_Villabruna	-0.001631	-1.555	3887	4038	92339
Mbuti.DG	PRD.pmd	AC16	RIP	-0.000293	-0.25	2421	2438	58135
Mbuti.DG	PRD.pmd	AC16	RIP.pmd	0.001106	0.712	1012	984	25289
Mbuti.DG	PRD.pmd	AC16	PRD	0.093543	85.605	9681	298	100313
Mbuti.DG	PRD.pmd	Italy_GrottaContinenza_R11.SG	Italy_GrottaContinenza_R15.SG	-0.000686	-0.644	3030	3081	74446
Mbuti.DG	PRD.pmd	Italy_GrottaContinenza_R11.SG	Italy_GrottaContinenza_R7.SG	-0.000617	-0.614	2877	2923	74652
Mbuti.DG	PRD.pmd	Italy_GrottaContinenza_R11.SG	Italy_OrienteC	-0.000174	-0.106	1034	1038	25564
Mbuti.DG	PRD.pmd	Italy_GrottaContinenza_R11.SG	Italy_Uzzo_EM	0.000618	0.578	2547	2509	62792
Mbuti.DG	PRD.pmd	Italy_GrottaContinenza_R11.SG	STO	-0.002173	-2.012	2749	2898	68296
Mbuti.DG	PRD.pmd	Italy_GrottaContinenza_R11.SG	Italy_Villabruna	-0.001085	-0.94	2983	3058	69073
Mbuti.DG	PRD.pmd	Italy_GrottaContinenza_R11.SG	RIP	-0.002326	-1.665	1746	1844	42054
Mbuti.DG	PRD.pmd	Italy_GrottaContinenza_R11.SG	RIP.pmd	-0.00094	-0.49	729	746	18003
Mbuti.DG	PRD.pmd	Italy_GrottaContinenza_R11.SG	PRD	0.094228	88.877	7433	216	76593
Mbuti.DG	PRD.pmd	Italy_GrottaContinenza_R15.SG	Italy_GrottaContinenza_R7.SG	0.000652	0.713	4410	4337	111276
Mbuti.DG	PRD.pmd	Italy_GrottaContinenza_R15.SG	Italy_OrienteC	0.002123	1.428	1587	1507	37842
Mbuti.DG	PRD.pmd	Italy_GrottaContinenza_R15.SG	Italy_Uzzo_EM	0.000974	1.017	3807	3716	93603
Mbuti.DG	PRD.pmd	Italy_GrottaContinenza_R15.SG	STO	-0.001732	-1.761	4090	4265	101547
Mbuti.DG	PRD.pmd	Italy_GrottaContinenza_R15.SG	Italy_Villabruna	-0.001347	-1.296	4416	4555	103047
Mbuti.DG	PRD.pmd	Italy_GrottaContinenza_R15.SG	RIP	-0.000632	-0.533	2630	2670	62877
Mbuti.DG	PRD.pmd	Italy_GrottaContinenza_R15.SG	RIP.pmd	-0.000361	-0.219	1092	1102	26897
Mbuti.DG	PRD.pmd	Italy_GrottaContinenza_R15.SG	PRD	0.095283	91.763	11208	304	114443
Mbuti.DG	PRD.pmd	Italy_GrottaContinenza_R7.SG	Italy_OrienteC	-0.000958	-0.638	1521	1558	37932
Mbuti.DG	PRD.pmd	Italy_GrottaContinenza_R7.SG	Italy_Uzzo_EM	0.000557	0.592	3740	3687	93686
Mbuti.DG	PRD.pmd	Italy_GrottaContinenza_R7.SG	STO	-0.00236	-2.5	4020	4260	101770
Mbuti.DG	PRD.pmd	Italy_GrottaContinenza_R7.SG	Italy_Villabruna	-0.001775	-1.825	4333	4516	103203
Mbuti.DG	PRD.pmd	Italy_GrottaContinenza_R7.SG	RIP	-0.001821	-1.616	2636	2750	62907
Mbuti.DG	PRD.pmd	Italy_GrottaContinenza_R7.SG	RIP.pmd	-0.001343	-0.863	1064	1100	26897
Mbuti.DG	PRD.pmd	Italy_GrottaContinenza_R7.SG	PRD	0.094712	93.74	11170	312	114646
Mbuti.DG	PRD.pmd	Italy_OrienteC	Italy_Uzzo_EM	0.000145	0.116	1088	1083	34371
Mbuti.DG	PRD.pmd	Italy_OrienteC	STO	-0.002251	-1.654	1316	1398	36414
Mbuti.DG	PRD.pmd	Italy_OrienteC	Italy_Villabruna	-0.002229	-1.575	1550	1634	37485
Mbuti.DG	PRD.pmd	Italy_OrienteC	RIP	-0.002217	-1.308	969	1022	23733
Mbuti.DG	PRD.pmd	Italy_OrienteC	RIP.pmd	-0.002555	-1.086	410	437	10665
Mbuti.DG	PRD.pmd	Italy_OrienteC	PRD	0.092025	63.147	3718	114	39162
Mbuti.DG	PRD.pmd	Italy_Uzzo_EM	STO	-0.003021	-3.301	3129	3395	87826
Mbuti.DG	PRD.pmd	Italy_Uzzo_EM	Italy_Villabruna	-0.002624	-2.568	3694	3930	89753
Mbuti.DG	PRD.pmd	Italy_Uzzo_EM	RIP	-0.001543	-1.378	2314	2402	56773
Mbuti.DG	PRD.pmd	Italy_Uzzo_EM	RIP.pmd	-0.000321	-0.21	993	1001	24710
Mbuti.DG	PRD.pmd	Italy_Uzzo_EM	PRD	0.092404	91.454	9228	279	96846
Mbuti.DG	PRD.pmd	STO	Italy_Villabruna	0.000642	0.635	4190	4127	96676
Mbuti.DG	PRD.pmd	STO	RIP	0.001576	1.312	2607	2514	59213
Mbuti.DG	PRD.pmd	STO	RIP.pmd	0.002377	1.437	1089	1029	25509
Mbuti.DG	PRD.pmd	STO	PRD	0.096247	92.562	10402	285	105116
Mbuti.DG	PRD.pmd	Italy_Villabruna	RIP	0.00082	0.709	2611	2561	60893
Mbuti.DG	PRD.pmd	Italy_Villabruna	RIP.pmd	0.002109	1.358	1097	1042	26381
Mbuti.DG	PRD.pmd	Italy_Villabruna	PRD	0.095133	89.431	10462	311	106704
Mbuti.DG	PRD.pmd	RIP	RIP.pmd	-0.001039	-1.735	184	213	27842
Mbuti.DG	PRD.pmd	RIP	PRD	0.093396	78.04	6276	200	65058
Mbuti.DG	PRD.pmd	RIP.pmd	PRD	0.089619	53.494	2584	89	27842

## Sheet: F.Epigravettian_with_others_F4
Outgroup	Testpop	Epigravettian1	Epigravettian2	F4	Z	nBABA	nABBA	nSNPs
Mbuti.DG	Georgia_Satsurblia.SG	AC16	Italy_GrottaContinenza_R11.SG	-0.000237	-0.396	14381	14468	367730
Mbuti.DG	Georgia_Satsurblia.SG	AC16	Italy_GrottaContinenza_R15.SG	-0.000226	-0.412	21294	21417	544869
Mbuti.DG	Georgia_Satsurblia.SG	AC16	Italy_GrottaContinenza_R7.SG	0.000663	1.218	21752	21390	546008
Mbuti.DG	Georgia_Satsurblia.SG	AC16	Italy_OrienteC	0.001207	1.597	6469	6275	161253
Mbuti.DG	Georgia_Satsurblia.SG	AC16	Italy_Uzzo_EM	0.00057	1.029	17025	16775	439173
Mbuti.DG	Georgia_Satsurblia.SG	AC16	Italy_Villabruna	-0.000127	-0.231	19658	19718	473533
Mbuti.DG	Georgia_Satsurblia.SG	AC16	PRD	5.7e-05	0.066	5703	5696	133791
Mbuti.DG	Georgia_Satsurblia.SG	AC16	RIP	4.9e-05	0.074	11366	11353	277326
Mbuti.DG	Georgia_Satsurblia.SG	AC16	STO	-0.00054	-0.984	18779	19040	482683
Mbuti.DG	Georgia_Satsurblia.SG	Italy_GrottaContinenza_R11.SG	Italy_GrottaContinenza_R15.SG	-0.000375	-0.69	19224	19408	490269
Mbuti.DG	Georgia_Satsurblia.SG	Italy_GrottaContinenza_R11.SG	Italy_GrottaContinenza_R7.SG	0.000442	0.851	18805	18588	491530
Mbuti.DG	Georgia_Satsurblia.SG	Italy_GrottaContinenza_R11.SG	Italy_OrienteC	8.3e-05	0.107	5052	5042	126620
Mbuti.DG	Georgia_Satsurblia.SG	Italy_GrottaContinenza_R11.SG	Italy_Uzzo_EM	0.000882	1.462	13934	13626	349993
Mbuti.DG	Georgia_Satsurblia.SG	Italy_GrottaContinenza_R11.SG	Italy_Villabruna	0.000231	0.392	16487	16397	389702
Mbuti.DG	Georgia_Satsurblia.SG	Italy_GrottaContinenza_R11.SG	PRD	0.00039	0.433	4443	4403	103799
Mbuti.DG	Georgia_Satsurblia.SG	Italy_GrottaContinenza_R11.SG	RIP	0.000628	0.923	9194	9056	219920
Mbuti.DG	Georgia_Satsurblia.SG	Italy_GrottaContinenza_R11.SG	STO	-0.000371	-0.651	16478	16631	413134
Mbuti.DG	Georgia_Satsurblia.SG	Italy_GrottaContinenza_R15.SG	Italy_GrottaContinenza_R7.SG	0.000616	1.206	28424	27976	727954
Mbuti.DG	Georgia_Satsurblia.SG	Italy_GrottaContinenza_R15.SG	Italy_OrienteC	0.00035	0.52	7450	7385	187699
Mbuti.DG	Georgia_Satsurblia.SG	Italy_GrottaContinenza_R15.SG	Italy_Uzzo_EM	0.000756	1.395	20544	20152	518073
Mbuti.DG	Georgia_Satsurblia.SG	Italy_GrottaContinenza_R15.SG	Italy_Villabruna	-0.000248	-0.48	24408	24551	578433
Mbuti.DG	Georgia_Satsurblia.SG	Italy_GrottaContinenza_R15.SG	PRD	0.000177	0.23	6650	6622	154491
Mbuti.DG	Georgia_Satsurblia.SG	Italy_GrottaContinenza_R15.SG	RIP	0.000108	0.176	13581	13546	326984
Mbuti.DG	Georgia_Satsurblia.SG	Italy_GrottaContinenza_R15.SG	STO	-0.000436	-0.808	24393	24659	609008
Mbuti.DG	Georgia_Satsurblia.SG	Italy_GrottaContinenza_R7.SG	Italy_OrienteC	-0.001119	-1.695	7319	7529	187995
Mbuti.DG	Georgia_Satsurblia.SG	Italy_GrottaContinenza_R7.SG	Italy_Uzzo_EM	9.8e-05	0.183	20261	20210	519102
Mbuti.DG	Georgia_Satsurblia.SG	Italy_GrottaContinenza_R7.SG	Italy_Villabruna	-0.000924	-1.748	24121	24657	579609
Mbuti.DG	Georgia_Satsurblia.SG	Italy_GrottaContinenza_R7.SG	PRD	-0.000665	-0.874	6612	6715	154727
Mbuti.DG	Georgia_Satsurblia.SG	Italy_GrottaContinenza_R7.SG	RIP	-0.000175	-0.286	13493	13550	327664
Mbuti.DG	Georgia_Satsurblia.SG	Italy_GrottaContinenza_R7.SG	STO	-0.001197	-2.271	24131	24862	610374
Mbuti.DG	Georgia_Satsurblia.SG	Italy_OrienteC	Italy_Uzzo_EM	4.8e-05	0.074	4870	4863	158604
Mbuti.DG	Georgia_Satsurblia.SG	Italy_OrienteC	Italy_Villabruna	0.000152	0.219	7393	7366	177823
Mbuti.DG	Georgia_Satsurblia.SG	Italy_OrienteC	PRD	0.00114	1.027	2177	2119	51487
Mbuti.DG	Georgia_Satsurblia.SG	Italy_OrienteC	RIP	0.000191	0.224	4255	4235	103515
Mbuti.DG	Georgia_Satsurblia.SG	Italy_OrienteC	STO	-0.000572	-0.858	6413	6513	175693
Mbuti.DG	Georgia_Satsurblia.SG	Italy_Uzzo_EM	Italy_Villabruna	-0.000593	-1.078	18854	19126	457354
Mbuti.DG	Georgia_Satsurblia.SG	Italy_Uzzo_EM	PRD	-0.00056	-0.685	5417	5489	128993
Mbuti.DG	Georgia_Satsurblia.SG	Italy_Uzzo_EM	RIP	-0.000535	-0.829	10902	11045	267487
Mbuti.DG	Georgia_Satsurblia.SG	Italy_Uzzo_EM	STO	-0.00141	-2.681	16346	17001	464525
Mbuti.DG	Georgia_Satsurblia.SG	Italy_Villabruna	PRD	4.5e-05	0.058	6141	6135	141651
Mbuti.DG	Georgia_Satsurblia.SG	Italy_Villabruna	RIP	0.000933	1.529	12340	12066	293896
Mbuti.DG	Georgia_Satsurblia.SG	RIP	PRD	0.001174	1.239	3660	3559	85913
Mbuti.DG	Georgia_Satsurblia.SG	STO	Italy_Villabruna	0.000467	0.84	21974	21730	521905
Mbuti.DG	Georgia_Satsurblia.SG	STO	PRD	0.000705	0.839	6180	6080	141082
Mbuti.DG	Georgia_Satsurblia.SG	STO	RIP	0.000819	1.264	12525	12284	294754
Mbuti.DG	GoyetQ116-1	AC16	Italy_GrottaContinenza_R11.SG	0.000583	0.842	10780	10624	266038
Mbuti.DG	GoyetQ116-1	AC16	Italy_GrottaContinenza_R15.SG	0.0011	1.679	16197	15759	398118
Mbuti.DG	GoyetQ116-1	AC16	Italy_GrottaContinenza_R7.SG	0.001181	1.829	16268	15797	398664
Mbuti.DG	GoyetQ116-1	AC16	Italy_OrienteC	0.001267	1.475	5763	5585	140816
Mbuti.DG	GoyetQ116-1	AC16	Italy_Uzzo_EM	0.000846	1.231	14052	13752	354585
Mbuti.DG	GoyetQ116-1	AC16	Italy_Villabruna	0.000314	0.465	16042	15924	377961
Mbuti.DG	GoyetQ116-1	AC16	PRD	-0.000531	-0.582	5222	5285	119374
Mbuti.DG	GoyetQ116-1	AC16	RIP	-2.9e-05	-0.039	9896	9902	237172
Mbuti.DG	GoyetQ116-1	AC16	STO	0.00122	1.782	15067	14617	368893
Mbuti.DG	GoyetQ116-1	Italy_GrottaContinenza_R11.SG	Italy_GrottaContinenza_R15.SG	0.000506	0.764	12111	11959	300844
Mbuti.DG	GoyetQ116-1	Italy_GrottaContinenza_R11.SG	Italy_GrottaContinenza_R7.SG	5.7e-05	0.088	11633	11615	301369
Mbuti.DG	GoyetQ116-1	Italy_GrottaContinenza_R11.SG	Italy_OrienteC	0.000382	0.419	4207	4168	102522
Mbuti.DG	GoyetQ116-1	Italy_GrottaContinenza_R11.SG	Italy_Uzzo_EM	0.000823	1.105	10348	10138	255204
Mbuti.DG	GoyetQ116-1	Italy_GrottaContinenza_R11.SG	Italy_Villabruna	-0.000175	-0.236	11992	12041	279311
Mbuti.DG	GoyetQ116-1	Italy_GrottaContinenza_R11.SG	PRD	-0.002028	-2.108	3619	3791	84821
Mbuti.DG	GoyetQ116-1	Italy_GrottaContinenza_R11.SG	RIP	-0.000406	-0.516	7176	7245	170209
Mbuti.DG	GoyetQ116-1	Italy_GrottaContinenza_R11.SG	STO	-0.000163	-0.226	11211	11256	275326
Mbuti.DG	GoyetQ116-1	Italy_GrottaContinenza_R15.SG	Italy_GrottaContinenza_R7.SG	-1.5e-05	-0.024	17692	17699	450374
Mbuti.DG	GoyetQ116-1	Italy_GrottaContinenza_R15.SG	Italy_OrienteC	-0.000103	-0.124	6175	6190	152720
Mbuti.DG	GoyetQ116-1	Italy_GrottaContinenza_R15.SG	Italy_Uzzo_EM	1.6e-05	0.024	15275	15269	381367
Mbuti.DG	GoyetQ116-1	Italy_GrottaContinenza_R15.SG	Italy_Villabruna	-0.001179	-1.788	17794	18287	418010
Mbuti.DG	GoyetQ116-1	Italy_GrottaContinenza_R15.SG	PRD	-0.001912	-2.238	5416	5658	126787
Mbuti.DG	GoyetQ116-1	Italy_GrottaContinenza_R15.SG	RIP	-0.001371	-1.88	10605	10955	254915
Mbuti.DG	GoyetQ116-1	Italy_GrottaContinenza_R15.SG	STO	-0.000406	-0.611	16658	16825	409745
Mbuti.DG	GoyetQ116-1	Italy_GrottaContinenza_R7.SG	Italy_OrienteC	-0.000668	-0.846	6125	6227	152929
Mbuti.DG	GoyetQ116-1	Italy_GrottaContinenza_R7.SG	Italy_Uzzo_EM	0.000202	0.299	15250	15173	381864
Mbuti.DG	GoyetQ116-1	Italy_GrottaContinenza_R7.SG	Italy_Villabruna	-0.001283	-1.959	17624	18161	418553
Mbuti.DG	GoyetQ116-1	Italy_GrottaContinenza_R7.SG	PRD	-0.002412	-2.693	5344	5650	126904
Mbuti.DG	GoyetQ116-1	Italy_GrottaContinenza_R7.SG	RIP	-0.001316	-1.894	10570	10906	255120
Mbuti.DG	GoyetQ116-1	Italy_GrottaContinenza_R7.SG	STO	-0.000378	-0.574	16522	16678	410465
Mbuti.DG	GoyetQ116-1	Italy_OrienteC	Italy_Uzzo_EM	-3.8e-05	-0.052	4368	4374	138223
Mbuti.DG	GoyetQ116-1	Italy_OrienteC	Italy_Villabruna	-0.000668	-0.792	6374	6474	150912
Mbuti.DG	GoyetQ116-1	Italy_OrienteC	PRD	-0.001222	-0.962	2059	2118	48444
Mbuti.DG	GoyetQ116-1	Italy_OrienteC	RIP	-0.0008	-0.833	3908	3983	94119
Mbuti.DG	GoyetQ116-1	Italy_OrienteC	STO	-6e-05	-0.073	5505	5514	146118
Mbuti.DG	GoyetQ116-1	Italy_Uzzo_EM	Italy_Villabruna	-0.001213	-1.704	15288	15731	365279
Mbuti.DG	GoyetQ116-1	Italy_Uzzo_EM	PRD	-0.001697	-1.821	4919	5115	115628
Mbuti.DG	GoyetQ116-1	Italy_Uzzo_EM	RIP	-0.001286	-1.725	9463	9758	229235
Mbuti.DG	GoyetQ116-1	Italy_Uzzo_EM	STO	2.5e-05	0.038	13061	13052	356099
Mbuti.DG	GoyetQ116-1	Italy_Villabruna	PRD	-0.00092	-1.066	5441	5555	123408
Mbuti.DG	GoyetQ116-1	Italy_Villabruna	RIP	0.000126	0.172	10440	10409	245935
Mbuti.DG	GoyetQ116-1	RIP	PRD	-0.00124	-1.236	3441	3541	80622
Mbuti.DG	GoyetQ116-1	STO	Italy_Villabruna	-0.000795	-1.198	16523	16833	390212
Mbuti.DG	GoyetQ116-1	STO	PRD	-0.001173	-1.303	5196	5337	119521
Mbuti.DG	GoyetQ116-1	STO	RIP	-0.001301	-1.67	10042	10352	238497
Mbuti.DG	GoyetQ2	AC16	Italy_GrottaContinenza_R11.SG	0.000668	0.885	7964	7835	194227
Mbuti.DG	GoyetQ2	AC16	Italy_GrottaContinenza_R15.SG	0.00072	1.029	11933	11724	290175
Mbuti.DG	GoyetQ2	AC16	Italy_GrottaContinenza_R7.SG	0.000205	0.288	11865	11806	290564
Mbuti.DG	GoyetQ2	AC16	Italy_OrienteC	0.000313	0.335	4156	4125	100813
Mbuti.DG	GoyetQ2	AC16	Italy_Uzzo_EM	-0.000561	-0.802	9797	9938	249930
Mbuti.DG	GoyetQ2	AC16	Italy_Villabruna	-0.002068	-2.802	11485	12051	274161
Mbuti.DG	GoyetQ2	AC16	PRD	-0.002419	-2.21	3513	3710	81460
Mbuti.DG	GoyetQ2	AC16	RIP	-0.002309	-2.741	6725	7101	163126
Mbuti.DG	GoyetQ2	AC16	STO	-0.000593	-0.828	10883	11043	268471
Mbuti.DG	GoyetQ2	Italy_GrottaContinenza_R11.SG	Italy_GrottaContinenza_R15.SG	-0.000242	-0.334	9541	9598	234136
Mbuti.DG	GoyetQ2	Italy_GrottaContinenza_R11.SG	Italy_GrottaContinenza_R7.SG	-0.000694	-1.004	9165	9328	234613
Mbuti.DG	GoyetQ2	Italy_GrottaContinenza_R11.SG	Italy_OrienteC	-0.000708	-0.696	3132	3186	75959
Mbuti.DG	GoyetQ2	Italy_GrottaContinenza_R11.SG	Italy_Uzzo_EM	-0.001354	-1.764	7499	7753	188139
Mbuti.DG	GoyetQ2	Italy_GrottaContinenza_R11.SG	Italy_Villabruna	-0.002614	-3.411	9097	9655	213569
Mbuti.DG	GoyetQ2	Italy_GrottaContinenza_R11.SG	PRD	-0.00409	-3.328	2591	2838	60282
Mbuti.DG	GoyetQ2	Italy_GrottaContinenza_R11.SG	RIP	-0.002735	-3.06	5053	5387	122199
Mbuti.DG	GoyetQ2	Italy_GrottaContinenza_R11.SG	STO	-0.001645	-2.219	8610	8959	212385
Mbuti.DG	GoyetQ2	Italy_GrottaContinenza_R15.SG	Italy_GrottaContinenza_R7.SG	-0.000611	-0.925	13915	14129	349836
Mbuti.DG	GoyetQ2	Italy_GrottaContinenza_R15.SG	Italy_OrienteC	-0.000552	-0.646	4630	4692	113330
Mbuti.DG	GoyetQ2	Italy_GrottaContinenza_R15.SG	Italy_Uzzo_EM	-0.001525	-2.415	11120	11548	280719
Mbuti.DG	GoyetQ2	Italy_GrottaContinenza_R15.SG	Italy_Villabruna	-0.002658	-3.927	13540	14388	319213
Mbuti.DG	GoyetQ2	Italy_GrottaContinenza_R15.SG	PRD	-0.003561	-3.451	3809	4130	90053
Mbuti.DG	GoyetQ2	Italy_GrottaContinenza_R15.SG	RIP	-0.003997	-5.095	7450	8182	183154
Mbuti.DG	GoyetQ2	Italy_GrottaContinenza_R15.SG	STO	-0.001122	-1.704	12943	13297	315672
Mbuti.DG	GoyetQ2	Italy_GrottaContinenza_R7.SG	Italy_OrienteC	-0.00022	-0.253	4665	4690	113424
Mbuti.DG	GoyetQ2	Italy_GrottaContinenza_R7.SG	Italy_Uzzo_EM	-0.000844	-1.258	11176	11413	281027
Mbuti.DG	GoyetQ2	Italy_GrottaContinenza_R7.SG	Italy_Villabruna	-0.001942	-2.843	13583	14204	319588
Mbuti.DG	GoyetQ2	Italy_GrottaContinenza_R7.SG	PRD	-0.00323	-3.281	3862	4154	90211
Mbuti.DG	GoyetQ2	Italy_GrottaContinenza_R7.SG	RIP	-0.002626	-3.361	7621	8103	183333
Mbuti.DG	GoyetQ2	Italy_GrottaContinenza_R7.SG	STO	-0.000513	-0.745	12966	13128	316187
Mbuti.DG	GoyetQ2	Italy_OrienteC	Italy_Uzzo_EM	-0.001199	-1.581	3132	3251	99422
Mbuti.DG	GoyetQ2	Italy_OrienteC	Italy_Villabruna	-0.001163	-1.31	4721	4850	111203
Mbuti.DG	GoyetQ2	Italy_OrienteC	PRD	-0.002043	-1.399	1476	1545	33727
Mbuti.DG	GoyetQ2	Italy_OrienteC	RIP	-0.003391	-3.202	2740	2964	66152
Mbuti.DG	GoyetQ2	Italy_OrienteC	STO	-8.9e-05	-0.103	4115	4124	108032
Mbuti.DG	GoyetQ2	Italy_Uzzo_EM	Italy_Villabruna	-0.001208	-1.733	11112	11434	267040
Mbuti.DG	GoyetQ2	Italy_Uzzo_EM	PRD	-0.00198	-1.938	3370	3527	79100
Mbuti.DG	GoyetQ2	Italy_Uzzo_EM	RIP	-0.002276	-2.822	6486	6848	159003
Mbuti.DG	GoyetQ2	Italy_Uzzo_EM	STO	0.000342	0.525	9763	9673	261397
Mbuti.DG	GoyetQ2	Italy_Villabruna	PRD	-0.000828	-0.816	3904	3976	87169
Mbuti.DG	GoyetQ2	Italy_Villabruna	RIP	-0.000211	-0.269	7519	7556	175562
Mbuti.DG	GoyetQ2	RIP	PRD	-0.000116	-0.098	2375	2382	54149
Mbuti.DG	GoyetQ2	STO	Italy_Villabruna	-0.001355	-2.073	12574	12976	296577
Mbuti.DG	GoyetQ2	STO	PRD	-0.002448	-2.43	3732	3940	84747
Mbuti.DG	GoyetQ2	STO	RIP	-0.00253	-3.178	7180	7612	170998
Mbuti.DG	OKL	AC16	Italy_GrottaContinenza_R11.SG	-0.001613	-2.455	18683	19396	442148
Mbuti.DG	OKL	AC16	Italy_GrottaContinenza_R15.SG	-0.001717	-2.797	27783	28917	660052
Mbuti.DG	OKL	AC16	Italy_GrottaContinenza_R7.SG	-0.001342	-2.207	28039	28926	661286
Mbuti.DG	OKL	AC16	Italy_OrienteC	-0.0021	-2.916	9019	9465	212323
Mbuti.DG	OKL	AC16	Italy_Uzzo_EM	-0.001744	-2.82	22916	23886	556246
Mbuti.DG	OKL	AC16	Italy_Villabruna	-0.004729	-6.99	25784	28624	600583
Mbuti.DG	OKL	AC16	PRD	-0.00765	-9.58	7449	8782	174181
Mbuti.DG	OKL	AC16	RIP	-0.003573	-4.764	15315	16589	356516
Mbuti.DG	OKL	AC16	STO	-0.001795	-2.972	25278	26354	599288
Mbuti.DG	OKL	Italy_GrottaContinenza_R11.SG	Italy_GrottaContinenza_R15.SG	-0.000411	-0.697	23475	23700	546194
Mbuti.DG	OKL	Italy_GrottaContinenza_R11.SG	Italy_GrottaContinenza_R7.SG	0.000519	0.938	22889	22605	547457
Mbuti.DG	OKL	Italy_GrottaContinenza_R11.SG	Italy_OrienteC	-0.001132	-1.469	6936	7119	161612
Mbuti.DG	OKL	Italy_GrottaContinenza_R11.SG	Italy_Uzzo_EM	-0.000188	-0.282	18166	18245	423982
Mbuti.DG	OKL	Italy_GrottaContinenza_R11.SG	Italy_Villabruna	-0.003471	-5.374	20881	22521	472379
Mbuti.DG	OKL	Italy_GrottaContinenza_R11.SG	PRD	-0.005856	-6.634	5717	6481	130542
Mbuti.DG	OKL	Italy_GrottaContinenza_R11.SG	RIP	-0.001763	-2.352	12078	12555	271035
Mbuti.DG	OKL	Italy_GrottaContinenza_R11.SG	STO	-0.000803	-1.291	20810	21197	482398
Mbuti.DG	OKL	Italy_GrottaContinenza_R15.SG	Italy_GrottaContinenza_R7.SG	0.000406	0.748	34671	34339	816241
Mbuti.DG	OKL	Italy_GrottaContinenza_R15.SG	Italy_OrienteC	-0.000998	-1.45	10336	10576	240850
Mbuti.DG	OKL	Italy_GrottaContinenza_R15.SG	Italy_Uzzo_EM	-0.000152	-0.266	27076	27172	632106
Mbuti.DG	OKL	Italy_GrottaContinenza_R15.SG	Italy_Villabruna	-0.00343	-5.519	31399	33820	705811
Mbuti.DG	OKL	Italy_GrottaContinenza_R15.SG	PRD	-0.005864	-7.92	8541	9684	194919
Mbuti.DG	OKL	Italy_GrottaContinenza_R15.SG	RIP	-0.00218	-3.271	17824	18708	405380
Mbuti.DG	OKL	Italy_GrottaContinenza_R15.SG	STO	-0.000484	-0.784	31287	31634	716343
Mbuti.DG	OKL	Italy_GrottaContinenza_R7.SG	Italy_OrienteC	-0.001431	-2.012	10251	10596	241252
Mbuti.DG	OKL	Italy_GrottaContinenza_R7.SG	Italy_Uzzo_EM	-0.000497	-0.829	26815	27129	633193
Mbuti.DG	OKL	Italy_GrottaContinenza_R7.SG	Italy_Villabruna	-0.003824	-6.171	31115	33818	706961
Mbuti.DG	OKL	Italy_GrottaContinenza_R7.SG	PRD	-0.006051	-8.038	8505	9686	195195
Mbuti.DG	OKL	Italy_GrottaContinenza_R7.SG	RIP	-0.002427	-3.574	17762	18747	405984
Mbuti.DG	OKL	Italy_GrottaContinenza_R7.SG	STO	-0.000733	-1.247	31063	31589	717805
Mbuti.DG	OKL	Italy_OrienteC	Italy_Uzzo_EM	0.000492	0.86	7097	6994	208622
Mbuti.DG	OKL	Italy_OrienteC	Italy_Villabruna	-0.002641	-3.662	10273	10888	232883
Mbuti.DG	OKL	Italy_OrienteC	PRD	-0.005104	-4.777	3009	3360	68725
Mbuti.DG	OKL	Italy_OrienteC	RIP	-0.001389	-1.639	6132	6324	137654
Mbuti.DG	OKL	Italy_OrienteC	STO	0.00055	0.799	9228	9103	227719
Mbuti.DG	OKL	Italy_Uzzo_EM	Italy_Villabruna	-0.003321	-5.015	25246	27176	581356
Mbuti.DG	OKL	Italy_Uzzo_EM	PRD	-0.005476	-6.434	7325	8247	168425
Mbuti.DG	OKL	Italy_Uzzo_EM	RIP	-0.00176	-2.568	15041	15648	345008
Mbuti.DG	OKL	Italy_Uzzo_EM	STO	3.1e-05	0.055	22718	22699	579105
Mbuti.DG	OKL	Italy_Villabruna	PRD	-0.002333	-2.879	8474	8903	184068
Mbuti.DG	OKL	Italy_Villabruna	RIP	0.001161	1.666	17292	16854	377634
Mbuti.DG	OKL	RIP	PRD	-0.002609	-2.808	5090	5386	113419
Mbuti.DG	OKL	STO	Italy_Villabruna	-0.003254	-5.054	28467	30577	648350
Mbuti.DG	OKL	STO	PRD	-0.005541	-6.752	8045	9049	181034
Mbuti.DG	OKL	STO	RIP	-0.002023	-2.826	16760	17514	372713
Mbuti.DG	Russia_AfontovaGora3	AC16	Italy_GrottaContinenza_R11.SG	-0.001124	-1.465	5303	5461	140161
Mbuti.DG	Russia_AfontovaGora3	AC16	Italy_GrottaContinenza_R15.SG	-0.000942	-1.336	7894	8091	208969
Mbuti.DG	Russia_AfontovaGora3	AC16	Italy_GrottaContinenza_R7.SG	-0.00083	-1.141	8010	8184	209399
Mbuti.DG	Russia_AfontovaGora3	AC16	Italy_OrienteC	-0.001279	-1.34	3010	3110	78243
Mbuti.DG	Russia_AfontovaGora3	AC16	Italy_Uzzo_EM	-0.000822	-1.196	6789	6941	184740
Mbuti.DG	Russia_AfontovaGora3	AC16	Italy_Villabruna	-0.000778	-1.093	8347	8508	206837
Mbuti.DG	Russia_AfontovaGora3	AC16	PRD	-0.000815	-0.759	2519	2569	60968
Mbuti.DG	Russia_AfontovaGora3	AC16	RIP	-0.000569	-0.69	4757	4826	121376
Mbuti.DG	Russia_AfontovaGora3	AC16	STO	-0.001419	-1.959	7518	7800	198488
Mbuti.DG	Russia_AfontovaGora3	Italy_GrottaContinenza_R11.SG	Italy_GrottaContinenza_R15.SG	0.000321	0.43	6272	6220	164090
Mbuti.DG	Russia_AfontovaGora3	Italy_GrottaContinenza_R11.SG	Italy_GrottaContinenza_R7.SG	-0.000322	-0.443	6017	6070	164433
Mbuti.DG	Russia_AfontovaGora3	Italy_GrottaContinenza_R11.SG	Italy_OrienteC	-0.001166	-1.071	2237	2305	57962
Mbuti.DG	Russia_AfontovaGora3	Italy_GrottaContinenza_R11.SG	Italy_Uzzo_EM	-1.8e-05	-0.024	5205	5208	136387
Mbuti.DG	Russia_AfontovaGora3	Italy_GrottaContinenza_R11.SG	Italy_Villabruna	0.000555	0.735	6606	6518	158202
Mbuti.DG	Russia_AfontovaGora3	Italy_GrottaContinenza_R11.SG	PRD	-0.000394	-0.316	1831	1848	44348
Mbuti.DG	Russia_AfontovaGora3	Italy_GrottaContinenza_R11.SG	RIP	0.00128	1.43	3658	3544	89570
Mbuti.DG	Russia_AfontovaGora3	Italy_GrottaContinenza_R11.SG	STO	-0.000748	-0.969	5888	6002	153008
Mbuti.DG	Russia_AfontovaGora3	Italy_GrottaContinenza_R15.SG	Italy_GrottaContinenza_R7.SG	-0.000538	-0.819	9122	9254	244886
Mbuti.DG	Russia_AfontovaGora3	Italy_GrottaContinenza_R15.SG	Italy_OrienteC	-0.000267	-0.293	3293	3317	86190
Mbuti.DG	Russia_AfontovaGora3	Italy_GrottaContinenza_R15.SG	Italy_Uzzo_EM	-0.000117	-0.187	7733	7756	203227
Mbuti.DG	Russia_AfontovaGora3	Italy_GrottaContinenza_R15.SG	Italy_Villabruna	0.000206	0.299	9780	9731	236030
Mbuti.DG	Russia_AfontovaGora3	Italy_GrottaContinenza_R15.SG	PRD	0.000573	0.555	2758	2720	66300
Mbuti.DG	Russia_AfontovaGora3	Italy_GrottaContinenza_R15.SG	RIP	-5e-06	-0.006	5345	5346	133955
Mbuti.DG	Russia_AfontovaGora3	Italy_GrottaContinenza_R15.SG	STO	-0.000853	-1.271	8734	8927	227008
Mbuti.DG	Russia_AfontovaGora3	Italy_GrottaContinenza_R7.SG	Italy_OrienteC	-0.000746	-0.826	3348	3413	86427
Mbuti.DG	Russia_AfontovaGora3	Italy_GrottaContinenza_R7.SG	Italy_Uzzo_EM	0.000153	0.225	7726	7695	203652
Mbuti.DG	Russia_AfontovaGora3	Italy_GrottaContinenza_R7.SG	Italy_Villabruna	0.000792	1.188	9864	9677	236566
Mbuti.DG	Russia_AfontovaGora3	Italy_GrottaContinenza_R7.SG	PRD	0.00043	0.423	2759	2731	66347
Mbuti.DG	Russia_AfontovaGora3	Italy_GrottaContinenza_R7.SG	RIP	0.000825	1.081	5404	5294	134074
Mbuti.DG	Russia_AfontovaGora3	Italy_GrottaContinenza_R7.SG	STO	-3.5e-05	-0.051	8858	8866	227538
Mbuti.DG	Russia_AfontovaGora3	Italy_OrienteC	Italy_Uzzo_EM	-0.000388	-0.478	2343	2373	77041
Mbuti.DG	Russia_AfontovaGora3	Italy_OrienteC	Italy_Villabruna	0.00152	1.649	3621	3489	86771
Mbuti.DG	Russia_AfontovaGora3	Italy_OrienteC	PRD	0.001117	0.702	1116	1087	26454
Mbuti.DG	Russia_AfontovaGora3	Italy_OrienteC	RIP	0.000691	0.626	2116	2080	51818
Mbuti.DG	Russia_AfontovaGora3	Italy_OrienteC	STO	-0.000227	-0.251	3025	3044	83474
Mbuti.DG	Russia_AfontovaGora3	Italy_Uzzo_EM	Italy_Villabruna	0.000424	0.624	8298	8212	201622
Mbuti.DG	Russia_AfontovaGora3	Italy_Uzzo_EM	PRD	-0.000916	-0.835	2430	2485	59634
Mbuti.DG	Russia_AfontovaGora3	Italy_Uzzo_EM	RIP	0.000528	0.703	4696	4633	118865
Mbuti.DG	Russia_AfontovaGora3	Italy_Uzzo_EM	STO	-0.000537	-0.793	6716	6820	193825
Mbuti.DG	Russia_AfontovaGora3	Italy_Villabruna	PRD	8.1e-05	0.076	2826	2820	66365
Mbuti.DG	Russia_AfontovaGora3	Italy_Villabruna	RIP	0.000455	0.572	5398	5337	133491
Mbuti.DG	Russia_AfontovaGora3	RIP	PRD	-0.000618	-0.469	1627	1652	40831
Mbuti.DG	Russia_AfontovaGora3	STO	Italy_Villabruna	0.000846	1.239	9372	9183	223687
Mbuti.DG	Russia_AfontovaGora3	STO	PRD	-0.000818	-0.74	2681	2733	63690
Mbuti.DG	Russia_AfontovaGora3	STO	RIP	0.000621	0.753	5218	5139	127876
Mbuti.DG	Russia_Kostenki14	AC16	Italy_GrottaContinenza_R11.SG	-0.000864	-1.406	19828	20259	498859
Mbuti.DG	Russia_Kostenki14	AC16	Italy_GrottaContinenza_R15.SG	-0.000326	-0.582	29699	29942	744391
Mbuti.DG	Russia_Kostenki14	AC16	Italy_GrottaContinenza_R7.SG	-5.3e-05	-0.094	30046	30085	745801
Mbuti.DG	Russia_Kostenki14	AC16	Italy_OrienteC	0.000346	0.476	8976	8900	220435
Mbuti.DG	Russia_Kostenki14	AC16	Italy_Uzzo_EM	-8.9e-05	-0.153	23644	23698	602893
Mbuti.DG	Russia_Kostenki14	AC16	Italy_Villabruna	0.000302	0.514	28081	27883	658078
Mbuti.DG	Russia_Kostenki14	AC16	PRD	-0.001368	-1.694	7855	8105	182376
Mbuti.DG	Russia_Kostenki14	AC16	RIP	-3e-05	-0.047	15822	15834	379363
Mbuti.DG	Russia_Kostenki14	AC16	STO	0.000138	0.238	26698	26607	661761
Mbuti.DG	Russia_Kostenki14	Italy_GrottaContinenza_R11.SG	Italy_GrottaContinenza_R15.SG	0.000633	1.096	26250	25838	650646
Mbuti.DG	Russia_Kostenki14	Italy_GrottaContinenza_R11.SG	Italy_GrottaContinenza_R7.SG	0.001044	1.884	25552	24870	652227
Mbuti.DG	Russia_Kostenki14	Italy_GrottaContinenza_R11.SG	Italy_OrienteC	0.000582	0.748	7157	7056	172604
Mbuti.DG	Russia_Kostenki14	Italy_GrottaContinenza_R11.SG	Italy_Uzzo_EM	0.0009	1.443	19197	18769	475123
Mbuti.DG	Russia_Kostenki14	Italy_GrottaContinenza_R11.SG	Italy_Villabruna	0.001456	2.316	23659	22874	538878
Mbuti.DG	Russia_Kostenki14	Italy_GrottaContinenza_R11.SG	PRD	-0.000225	-0.279	6128	6160	140839
Mbuti.DG	Russia_Kostenki14	Italy_GrottaContinenza_R11.SG	RIP	0.000918	1.407	12717	12443	298712
Mbuti.DG	Russia_Kostenki14	Italy_GrottaContinenza_R11.SG	STO	0.000664	1.232	22942	22571	558315
Mbuti.DG	Russia_Kostenki14	Italy_GrottaContinenza_R15.SG	Italy_GrottaContinenza_R7.SG	0.000202	0.389	38329	38133	972377
Mbuti.DG	Russia_Kostenki14	Italy_GrottaContinenza_R15.SG	Italy_OrienteC	-0.000208	-0.31	10450	10504	257444
Mbuti.DG	Russia_Kostenki14	Italy_GrottaContinenza_R15.SG	Italy_Uzzo_EM	0.000136	0.255	28313	28217	708190
Mbuti.DG	Russia_Kostenki14	Italy_GrottaContinenza_R15.SG	Italy_Villabruna	0.000203	0.366	34908	34744	805246
Mbuti.DG	Russia_Kostenki14	Italy_GrottaContinenza_R15.SG	PRD	-0.000478	-0.661	9110	9211	210708
Mbuti.DG	Russia_Kostenki14	Italy_GrottaContinenza_R15.SG	RIP	-0.000171	-0.288	18838	18914	447076
Mbuti.DG	Russia_Kostenki14	Italy_GrottaContinenza_R15.SG	STO	4.2e-05	0.077	34108	34074	828468
Mbuti.DG	Russia_Kostenki14	Italy_GrottaContinenza_R7.SG	Italy_OrienteC	-0.00034	-0.5	10411	10499	257878
Mbuti.DG	Russia_Kostenki14	Italy_GrottaContinenza_R7.SG	Italy_Uzzo_EM	9.3e-05	0.167	28305	28239	709541
Mbuti.DG	Russia_Kostenki14	Italy_GrottaContinenza_R7.SG	Italy_Villabruna	0.000213	0.366	34665	34493	806705
Mbuti.DG	Russia_Kostenki14	Italy_GrottaContinenza_R7.SG	PRD	-0.001453	-1.947	9061	9367	210977
Mbuti.DG	Russia_Kostenki14	Italy_GrottaContinenza_R7.SG	RIP	6e-05	0.104	18781	18754	447688
Mbuti.DG	Russia_Kostenki14	Italy_GrottaContinenza_R7.SG	STO	-0.000129	-0.228	33879	33986	830263
Mbuti.DG	Russia_Kostenki14	Italy_OrienteC	Italy_Uzzo_EM	8.4e-05	0.138	6866	6848	216120
Mbuti.DG	Russia_Kostenki14	Italy_OrienteC	Italy_Villabruna	0.000432	0.599	10555	10450	244637
Mbuti.DG	Russia_Kostenki14	Italy_OrienteC	PRD	0.000969	0.902	3065	2998	69032
Mbuti.DG	Russia_Kostenki14	Italy_OrienteC	RIP	0.0008	1	6010	5898	140334
Mbuti.DG	Russia_Kostenki14	Italy_OrienteC	STO	0.000307	0.451	9196	9122	239996
Mbuti.DG	Russia_Kostenki14	Italy_Uzzo_EM	Italy_Villabruna	9.6e-05	0.162	26774	26713	633733
Mbuti.DG	Russia_Kostenki14	Italy_Uzzo_EM	PRD	-0.000983	-1.238	7485	7657	175477
Mbuti.DG	Russia_Kostenki14	Italy_Uzzo_EM	RIP	0.000162	0.256	15257	15198	365456
Mbuti.DG	Russia_Kostenki14	Italy_Uzzo_EM	STO	2.1e-05	0.04	23333	23320	636295
Mbuti.DG	Russia_Kostenki14	Italy_Villabruna	PRD	-0.001435	-1.919	8554	8833	194623
Mbuti.DG	Russia_Kostenki14	Italy_Villabruna	RIP	0.000211	0.343	17278	17193	405714
Mbuti.DG	Russia_Kostenki14	RIP	PRD	-0.000586	-0.64	4999	5067	116267
Mbuti.DG	Russia_Kostenki14	STO	Italy_Villabruna	0.000124	0.217	31059	30969	724771
Mbuti.DG	Russia_Kostenki14	STO	PRD	-0.001151	-1.557	8409	8631	192159
Mbuti.DG	Russia_Kostenki14	STO	RIP	-0.000246	-0.409	17227	17326	403007
Mbuti.DG	Russia_MA1.SG	AC16	Italy_GrottaContinenza_R11.SG	-0.000299	-0.47	14919	15031	375264
Mbuti.DG	Russia_MA1.SG	AC16	Italy_GrottaContinenza_R15.SG	0.000658	1.119	22701	22333	559202
Mbuti.DG	Russia_MA1.SG	AC16	Italy_GrottaContinenza_R7.SG	0.000507	0.86	22529	22245	560197
Mbuti.DG	Russia_MA1.SG	AC16	Italy_OrienteC	0.000998	1.279	6960	6790	170214
Mbuti.DG	Russia_MA1.SG	AC16	Italy_Uzzo_EM	0.000158	0.25	17888	17816	455300
Mbuti.DG	Russia_MA1.SG	AC16	Italy_Villabruna	0.000292	0.475	21074	20929	495764
Mbuti.DG	Russia_MA1.SG	AC16	PRD	0.001133	1.367	6186	6028	139964
Mbuti.DG	Russia_MA1.SG	AC16	RIP	0.00039	0.562	12094	11981	288793
Mbuti.DG	Russia_MA1.SG	AC16	STO	6.6e-05	0.109	19963	19930	498716
Mbuti.DG	Russia_MA1.SG	Italy_GrottaContinenza_R11.SG	Italy_GrottaContinenza_R15.SG	0.000853	1.435	19913	19494	491785
Mbuti.DG	Russia_MA1.SG	Italy_GrottaContinenza_R11.SG	Italy_GrottaContinenza_R7.SG	0.000684	1.22	19244	18907	492826
Mbuti.DG	Russia_MA1.SG	Italy_GrottaContinenza_R11.SG	Italy_OrienteC	0.000687	0.838	5489	5398	132264
Mbuti.DG	Russia_MA1.SG	Italy_GrottaContinenza_R11.SG	Italy_Uzzo_EM	0.001089	1.719	14496	14107	357827
Mbuti.DG	Russia_MA1.SG	Italy_GrottaContinenza_R11.SG	Italy_Villabruna	0.000879	1.393	17567	17213	403436
Mbuti.DG	Russia_MA1.SG	Italy_GrottaContinenza_R11.SG	PRD	0.001388	1.6	4766	4617	107487
Mbuti.DG	Russia_MA1.SG	Italy_GrottaContinenza_R11.SG	RIP	0.000411	0.563	9601	9508	226374
Mbuti.DG	Russia_MA1.SG	Italy_GrottaContinenza_R11.SG	STO	0.000772	1.255	17276	16952	419818
Mbuti.DG	Russia_MA1.SG	Italy_GrottaContinenza_R15.SG	Italy_GrottaContinenza_R7.SG	-0.000242	-0.439	28840	29017	733445
Mbuti.DG	Russia_MA1.SG	Italy_GrottaContinenza_R15.SG	Italy_OrienteC	-0.000263	-0.346	8020	8072	196835
Mbuti.DG	Russia_MA1.SG	Italy_GrottaContinenza_R15.SG	Italy_Uzzo_EM	-0.000112	-0.193	21245	21305	532484
Mbuti.DG	Russia_MA1.SG	Italy_GrottaContinenza_R15.SG	Italy_Villabruna	-0.0005	-0.843	25793	26094	601734
Mbuti.DG	Russia_MA1.SG	Italy_GrottaContinenza_R15.SG	PRD	-0.000321	-0.392	7040	7092	160464
Mbuti.DG	Russia_MA1.SG	Italy_GrottaContinenza_R15.SG	RIP	-0.000674	-1.001	14133	14361	338052
Mbuti.DG	Russia_MA1.SG	Italy_GrottaContinenza_R15.SG	STO	-0.000533	-0.894	25451	25782	621553
Mbuti.DG	Russia_MA1.SG	Italy_GrottaContinenza_R7.SG	Italy_OrienteC	-0.000239	-0.336	7955	8002	197206
Mbuti.DG	Russia_MA1.SG	Italy_GrottaContinenza_R7.SG	Italy_Uzzo_EM	-0.000174	-0.291	21139	21232	533517
Mbuti.DG	Russia_MA1.SG	Italy_GrottaContinenza_R7.SG	Italy_Villabruna	-0.000367	-0.635	25782	26003	602791
Mbuti.DG	Russia_MA1.SG	Italy_GrottaContinenza_R7.SG	PRD	-0.00013	-0.167	6990	7011	160699
Mbuti.DG	Russia_MA1.SG	Italy_GrottaContinenza_R7.SG	RIP	-0.00033	-0.486	14170	14282	338526
Mbuti.DG	Russia_MA1.SG	Italy_GrottaContinenza_R7.SG	STO	-0.000227	-0.381	25228	25369	622833
Mbuti.DG	Russia_MA1.SG	Italy_OrienteC	Italy_Uzzo_EM	-0.000692	-1.092	5165	5280	166964
Mbuti.DG	Russia_MA1.SG	Italy_OrienteC	Italy_Villabruna	-3.2e-05	-0.043	8032	8038	188116
Mbuti.DG	Russia_MA1.SG	Italy_OrienteC	PRD	-0.000649	-0.566	2359	2394	54349
Mbuti.DG	Russia_MA1.SG	Italy_OrienteC	RIP	-6.5e-05	-0.07	4604	4611	109306
Mbuti.DG	Russia_MA1.SG	Italy_OrienteC	STO	-0.000276	-0.366	6909	6960	184657
Mbuti.DG	Russia_MA1.SG	Italy_Uzzo_EM	Italy_Villabruna	-0.000187	-0.299	20162	20251	478328
Mbuti.DG	Russia_MA1.SG	Italy_Uzzo_EM	PRD	0.00046	0.565	5857	5795	134906
Mbuti.DG	Russia_MA1.SG	Italy_Uzzo_EM	RIP	-0.000313	-0.451	11521	11608	278622
Mbuti.DG	Russia_MA1.SG	Italy_Uzzo_EM	STO	-0.000148	-0.262	17450	17521	480249
Mbuti.DG	Russia_MA1.SG	Italy_Villabruna	PRD	5e-05	0.062	6614	6607	149056
Mbuti.DG	Russia_MA1.SG	Italy_Villabruna	RIP	8.9e-05	0.133	13052	13024	308203
Mbuti.DG	Russia_MA1.SG	RIP	PRD	0.000846	0.854	3951	3875	90149
Mbuti.DG	Russia_MA1.SG	STO	Italy_Villabruna	-4.4e-05	-0.07	23262	23286	544545
Mbuti.DG	Russia_MA1.SG	STO	PRD	0.000382	0.448	6537	6480	147178
Mbuti.DG	Russia_MA1.SG	STO	RIP	-8.7e-05	-0.125	13108	13135	306208
Mbuti.DG	Spain_ElMiron	AC16	Italy_GrottaContinenza_R11.SG	-0.000348	-0.5	13275	13389	327177
Mbuti.DG	Spain_ElMiron	AC16	Italy_GrottaContinenza_R15.SG	-0.000831	-1.222	19689	20095	489269
Mbuti.DG	Spain_ElMiron	AC16	Italy_GrottaContinenza_R7.SG	-0.000577	-0.835	19779	20062	489815
Mbuti.DG	Spain_ElMiron	AC16	Italy_OrienteC	0.001744	2.044	7503	7195	176137
Mbuti.DG	Spain_ElMiron	AC16	Italy_Uzzo_EM	0.001475	2.13	17552	16920	427926
Mbuti.DG	Spain_ElMiron	AC16	Italy_Villabruna	-0.002943	-4.163	20115	21530	480777
Mbuti.DG	Spain_ElMiron	AC16	PRD	-0.003801	-4.232	5854	6381	138557
Mbuti.DG	Spain_ElMiron	AC16	RIP	-0.003118	-4.043	11413	12285	279842
Mbuti.DG	Spain_ElMiron	AC16	STO	0.000784	1.164	18985	18625	459612
Mbuti.DG	Spain_ElMiron	Italy_GrottaContinenza_R11.SG	Italy_GrottaContinenza_R15.SG	-0.000454	-0.671	15679	15854	385842
Mbuti.DG	Spain_ElMiron	Italy_GrottaContinenza_R11.SG	Italy_GrottaContinenza_R7.SG	-0.000468	-0.652	15111	15292	386453
Mbuti.DG	Spain_ElMiron	Italy_GrottaContinenza_R11.SG	Italy_OrienteC	0.001596	1.831	5630	5420	131224
Mbuti.DG	Spain_ElMiron	Italy_GrottaContinenza_R11.SG	Italy_Uzzo_EM	0.001645	2.266	13306	12782	318047
Mbuti.DG	Spain_ElMiron	Italy_GrottaContinenza_R11.SG	Italy_Villabruna	-0.002974	-4.2	15766	16868	370208
Mbuti.DG	Spain_ElMiron	Italy_GrottaContinenza_R11.SG	PRD	-0.004063	-4.288	4319	4732	101728
Mbuti.DG	Spain_ElMiron	Italy_GrottaContinenza_R11.SG	RIP	-0.002815	-3.442	8686	9271	207910
Mbuti.DG	Spain_ElMiron	Italy_GrottaContinenza_R11.SG	STO	0.000894	1.294	15012	14693	356612
Mbuti.DG	Spain_ElMiron	Italy_GrottaContinenza_R15.SG	Italy_GrottaContinenza_R7.SG	0.000272	0.446	23017	22860	577387
Mbuti.DG	Spain_ElMiron	Italy_GrottaContinenza_R15.SG	Italy_OrienteC	0.001697	2.066	8291	7958	196132
Mbuti.DG	Spain_ElMiron	Italy_GrottaContinenza_R15.SG	Italy_Uzzo_EM	0.002169	3.173	19938	18908	475082
Mbuti.DG	Spain_ElMiron	Italy_GrottaContinenza_R15.SG	Italy_Villabruna	-0.002442	-3.699	23668	25022	554151
Mbuti.DG	Spain_ElMiron	Italy_GrottaContinenza_R15.SG	PRD	-0.002933	-3.436	6510	6956	152207
Mbuti.DG	Spain_ElMiron	Italy_GrottaContinenza_R15.SG	RIP	-0.002491	-3.402	12961	13737	311498
Mbuti.DG	Spain_ElMiron	Italy_GrottaContinenza_R15.SG	STO	0.001387	2.042	22526	21790	530994
Mbuti.DG	Spain_ElMiron	Italy_GrottaContinenza_R7.SG	Italy_OrienteC	0.001561	1.94	8324	8017	196407
Mbuti.DG	Spain_ElMiron	Italy_GrottaContinenza_R7.SG	Italy_Uzzo_EM	0.001865	2.738	19665	18779	475567
Mbuti.DG	Spain_ElMiron	Italy_GrottaContinenza_R7.SG	Italy_Villabruna	-0.002657	-3.907	23513	24987	554839
Mbuti.DG	Spain_ElMiron	Italy_GrottaContinenza_R7.SG	PRD	-0.00395	-4.373	6377	6978	152328
Mbuti.DG	Spain_ElMiron	Italy_GrottaContinenza_R7.SG	RIP	-0.002653	-3.578	12895	13722	311674
Mbuti.DG	Spain_ElMiron	Italy_GrottaContinenza_R7.SG	STO	0.001241	1.859	22376	21717	531779
Mbuti.DG	Spain_ElMiron	Italy_OrienteC	Italy_Uzzo_EM	-0.000426	-0.589	5595	5669	173612
Mbuti.DG	Spain_ElMiron	Italy_OrienteC	Italy_Villabruna	-0.004007	-4.86	8205	8993	196654
Mbuti.DG	Spain_ElMiron	Italy_OrienteC	PRD	-0.00396	-3.299	2462	2693	58317
Mbuti.DG	Spain_ElMiron	Italy_OrienteC	RIP	-0.004139	-4.481	4757	5238	116040
Mbuti.DG	Spain_ElMiron	Italy_OrienteC	STO	-0.000325	-0.421	7279	7341	188309
Mbuti.DG	Spain_ElMiron	Italy_Uzzo_EM	Italy_Villabruna	-0.004463	-6.549	19246	21336	468336
Mbuti.DG	Spain_ElMiron	Italy_Uzzo_EM	PRD	-0.005476	-5.957	5562	6303	135357
Mbuti.DG	Spain_ElMiron	Italy_Uzzo_EM	RIP	-0.004434	-6.073	10954	12167	273580
Mbuti.DG	Spain_ElMiron	Italy_Uzzo_EM	STO	-0.000625	-0.964	16727	17007	448334
Mbuti.DG	Spain_ElMiron	Italy_Villabruna	PRD	-0.001268	-1.485	6739	6932	151486
Mbuti.DG	Spain_ElMiron	Italy_Villabruna	RIP	4e-06	0.005	13231	13230	308261
Mbuti.DG	Spain_ElMiron	RIP	PRD	-0.001276	-1.309	3970	4088	92603
Mbuti.DG	Spain_ElMiron	STO	Italy_Villabruna	-0.003775	-5.689	21746	23708	519804
Mbuti.DG	Spain_ElMiron	STO	PRD	-0.005167	-5.882	6125	6872	144638
Mbuti.DG	Spain_ElMiron	STO	RIP	-0.004128	-5.492	12224	13440	294542
Mbuti.DG	Czech_Vestonice	AC16	Italy_GrottaContinenza_R11.SG	0.000133	0.262	19537	19474	482491
Mbuti.DG	Czech_Vestonice	AC16	Italy_GrottaContinenza_R15.SG	-1.9e-05	-0.039	28989	29002	720030
Mbuti.DG	Czech_Vestonice	AC16	Italy_GrottaContinenza_R7.SG	9.8e-05	0.215	29307	29236	721303
Mbuti.DG	Czech_Vestonice	AC16	Italy_OrienteC	-0.00012	-0.205	9297	9324	227330
Mbuti.DG	Czech_Vestonice	AC16	Italy_Uzzo_EM	1.2e-05	0.024	23690	23683	598608
Mbuti.DG	Czech_Vestonice	AC16	Italy_Villabruna	-0.000391	-0.811	28104	28361	657907
Mbuti.DG	Czech_Vestonice	AC16	PRD	-0.001576	-2.408	7996	8287	184761
Mbuti.DG	Czech_Vestonice	AC16	RIP	9.2e-05	0.169	16057	16022	380923
Mbuti.DG	Czech_Vestonice	AC16	STO	0.000741	1.601	26723	26240	652300
Mbuti.DG	Czech_Vestonice	Italy_GrottaContinenza_R11.SG	Italy_GrottaContinenza_R15.SG	0.000127	0.257	24655	24577	608962
Mbuti.DG	Czech_Vestonice	Italy_GrottaContinenza_R11.SG	Italy_GrottaContinenza_R7.SG	0.000178	0.382	23825	23716	610283
Mbuti.DG	Czech_Vestonice	Italy_GrottaContinenza_R11.SG	Italy_OrienteC	-0.000679	-1.123	7192	7312	175426
Mbuti.DG	Czech_Vestonice	Italy_GrottaContinenza_R11.SG	Italy_Uzzo_EM	0.000309	0.615	18775	18632	463356
Mbuti.DG	Czech_Vestonice	Italy_GrottaContinenza_R11.SG	Italy_Villabruna	-0.000352	-0.716	22981	23167	529102
Mbuti.DG	Czech_Vestonice	Italy_GrottaContinenza_R11.SG	PRD	-0.001973	-2.855	6059	6336	140474
Mbuti.DG	Czech_Vestonice	Italy_GrottaContinenza_R11.SG	RIP	0.000554	0.945	12648	12485	294466
Mbuti.DG	Czech_Vestonice	Italy_GrottaContinenza_R11.SG	STO	0.000577	1.147	22201	21891	536576
Mbuti.DG	Czech_Vestonice	Italy_GrottaContinenza_R15.SG	Italy_GrottaContinenza_R7.SG	2.1e-05	0.047	36114	36095	909845
Mbuti.DG	Czech_Vestonice	Italy_GrottaContinenza_R15.SG	Italy_OrienteC	-0.000703	-1.315	10686	10870	261561
Mbuti.DG	Czech_Vestonice	Italy_GrottaContinenza_R15.SG	Italy_Uzzo_EM	-0.000116	-0.241	27756	27836	690769
Mbuti.DG	Czech_Vestonice	Italy_GrottaContinenza_R15.SG	Italy_Villabruna	-0.000654	-1.427	34345	34862	790387
Mbuti.DG	Czech_Vestonice	Italy_GrottaContinenza_R15.SG	PRD	-0.001736	-2.767	9111	9476	209884
Mbuti.DG	Czech_Vestonice	Italy_GrottaContinenza_R15.SG	RIP	-7.7e-05	-0.147	18735	18769	440608
Mbuti.DG	Czech_Vestonice	Italy_GrottaContinenza_R15.SG	STO	0.000519	1.027	33152	32738	796393
Mbuti.DG	Czech_Vestonice	Italy_GrottaContinenza_R7.SG	Italy_OrienteC	-0.001011	-1.769	10639	10904	262008
Mbuti.DG	Czech_Vestonice	Italy_GrottaContinenza_R7.SG	Italy_Uzzo_EM	-7e-06	-0.015	27770	27775	691978
Mbuti.DG	Czech_Vestonice	Italy_GrottaContinenza_R7.SG	Italy_Villabruna	-0.000689	-1.505	34144	34690	791684
Mbuti.DG	Czech_Vestonice	Italy_GrottaContinenza_R7.SG	PRD	-0.002076	-3.355	9067	9504	210151
Mbuti.DG	Czech_Vestonice	Italy_GrottaContinenza_R7.SG	RIP	-4.1e-05	-0.077	18745	18763	441297
Mbuti.DG	Czech_Vestonice	Italy_GrottaContinenza_R7.SG	STO	0.0005	1.036	33024	32625	797990
Mbuti.DG	Czech_Vestonice	Italy_OrienteC	Italy_Uzzo_EM	0.000476	0.969	7201	7095	223400
Mbuti.DG	Czech_Vestonice	Italy_OrienteC	Italy_Villabruna	0.000214	0.361	10937	10883	252335
Mbuti.DG	Czech_Vestonice	Italy_OrienteC	PRD	-0.00087	-0.963	3162	3226	72573
Mbuti.DG	Czech_Vestonice	Italy_OrienteC	RIP	-2.1e-05	-0.031	6300	6303	146403
Mbuti.DG	Czech_Vestonice	Italy_OrienteC	STO	0.001142	1.994	9578	9297	246221
Mbuti.DG	Czech_Vestonice	Italy_Uzzo_EM	Italy_Villabruna	-0.000453	-0.9	26993	27281	636414
Mbuti.DG	Czech_Vestonice	Italy_Uzzo_EM	PRD	-0.001525	-2.308	7696	7968	178808
Mbuti.DG	Czech_Vestonice	Italy_Uzzo_EM	RIP	-8e-05	-0.143	15488	15517	369055
Mbuti.DG	Czech_Vestonice	Italy_Uzzo_EM	STO	0.000638	1.342	23593	23190	630866
Mbuti.DG	Czech_Vestonice	Italy_Villabruna	PRD	-0.000923	-1.504	8801	8984	198476
Mbuti.DG	Czech_Vestonice	Italy_Villabruna	RIP	0.000531	0.96	17745	17527	410861
Mbuti.DG	Czech_Vestonice	RIP	PRD	-0.001587	-2.092	5151	5341	119762
Mbuti.DG	Czech_Vestonice	STO	Italy_Villabruna	-0.001169	-2.378	30791	31634	720899
Mbuti.DG	Czech_Vestonice	STO	PRD	-0.001779	-2.784	8525	8870	194285
Mbuti.DG	Czech_Vestonice	STO	RIP	-0.000615	-1.091	17400	17649	403625
Mbuti.DG	PA12	AC16	Italy_GrottaContinenza_R11.SG	0.000773	1.243	14730	14448	364097
Mbuti.DG	PA12	AC16	Italy_GrottaContinenza_R15.SG	0.000391	0.658	21817	21605	542016
Mbuti.DG	PA12	AC16	Italy_GrottaContinenza_R7.SG	0.000386	0.64	22010	21801	542860
Mbuti.DG	PA12	AC16	Italy_OrienteC	0.000395	0.521	7317	7247	178841
Mbuti.DG	PA12	AC16	Italy_Uzzo_EM	0.001042	1.723	18811	18319	471807
Mbuti.DG	PA12	AC16	Italy_Villabruna	7.7e-05	0.124	21081	21042	497396
Mbuti.DG	PA12	AC16	PRD	-0.001626	-1.962	6469	6714	150506
Mbuti.DG	PA12	AC16	RIP	-0.000714	-1.02	12612	12830	305027
Mbuti.DG	PA12	AC16	STO	0.001063	1.669	20172	19644	496557
Mbuti.DG	PA12	Italy_GrottaContinenza_R11.SG	Italy_GrottaContinenza_R15.SG	-0.000245	-0.405	17088	17193	427829
Mbuti.DG	PA12	Italy_GrottaContinenza_R11.SG	Italy_GrottaContinenza_R7.SG	-0.000231	-0.408	16636	16735	428691
Mbuti.DG	PA12	Italy_GrottaContinenza_R11.SG	Italy_OrienteC	-0.000926	-1.126	5367	5489	132358
Mbuti.DG	PA12	Italy_GrottaContinenza_R11.SG	Italy_Uzzo_EM	0.000359	0.566	14107	13982	349523
Mbuti.DG	PA12	Italy_GrottaContinenza_R11.SG	Italy_Villabruna	-0.000498	-0.804	16132	16320	377510
Mbuti.DG	PA12	Italy_GrottaContinenza_R11.SG	PRD	-0.002782	-3.104	4621	4925	109365
Mbuti.DG	PA12	Italy_GrottaContinenza_R11.SG	RIP	-0.000382	-0.534	9379	9465	224210
Mbuti.DG	PA12	Italy_GrottaContinenza_R11.SG	STO	0.000373	0.577	15755	15612	384174
Mbuti.DG	PA12	Italy_GrottaContinenza_R15.SG	Italy_GrottaContinenza_R7.SG	4.9e-05	0.086	25211	25179	636635
Mbuti.DG	PA12	Italy_GrottaContinenza_R15.SG	Italy_OrienteC	-0.000494	-0.67	7969	8067	196639
Mbuti.DG	PA12	Italy_GrottaContinenza_R15.SG	Italy_Uzzo_EM	0.000684	1.19	21095	20740	519344
Mbuti.DG	PA12	Italy_GrottaContinenza_R15.SG	Italy_Villabruna	-0.000408	-0.681	24064	24293	562152
Mbuti.DG	PA12	Italy_GrottaContinenza_R15.SG	PRD	-0.002084	-2.552	6975	7315	162928
Mbuti.DG	PA12	Italy_GrottaContinenza_R15.SG	RIP	-0.001179	-1.833	13830	14225	334636
Mbuti.DG	PA12	Italy_GrottaContinenza_R15.SG	STO	0.000672	1.098	23536	23154	568585
Mbuti.DG	PA12	Italy_GrottaContinenza_R7.SG	Italy_OrienteC	-0.00057	-0.775	7987	8099	197012
Mbuti.DG	PA12	Italy_GrottaContinenza_R7.SG	Italy_Uzzo_EM	0.000698	1.162	21031	20668	520153
Mbuti.DG	PA12	Italy_GrottaContinenza_R7.SG	Italy_Villabruna	-0.000402	-0.706	24046	24272	563011
Mbuti.DG	PA12	Italy_GrottaContinenza_R7.SG	PRD	-0.002268	-2.961	6922	7292	163111
Mbuti.DG	PA12	Italy_GrottaContinenza_R7.SG	RIP	-0.000774	-1.164	13942	14202	335050
Mbuti.DG	PA12	Italy_GrottaContinenza_R7.SG	STO	0.000614	1.014	23486	23136	569558
Mbuti.DG	PA12	Italy_OrienteC	Italy_Uzzo_EM	0.000487	0.773	5560	5474	176054
Mbuti.DG	PA12	Italy_OrienteC	Italy_Villabruna	2.2e-05	0.028	8164	8160	191601
Mbuti.DG	PA12	Italy_OrienteC	PRD	-0.000216	-0.183	2541	2553	58970
Mbuti.DG	PA12	Italy_OrienteC	RIP	-0.000388	-0.434	4907	4952	116786
Mbuti.DG	PA12	Italy_OrienteC	STO	0.000328	0.44	7153	7091	187507
Mbuti.DG	PA12	Italy_Uzzo_EM	Italy_Villabruna	-0.001207	-1.979	20103	20685	482257
Mbuti.DG	PA12	Italy_Uzzo_EM	PRD	-0.002508	-2.972	6131	6496	145641
Mbuti.DG	PA12	Italy_Uzzo_EM	RIP	-0.00125	-1.867	12092	12461	295041
Mbuti.DG	PA12	Italy_Uzzo_EM	STO	0.00021	0.352	17656	17556	480214
Mbuti.DG	PA12	Italy_Villabruna	PRD	-0.001158	-1.441	6795	6975	155382
Mbuti.DG	PA12	Italy_Villabruna	RIP	5e-06	0.007	13353	13351	314716
Mbuti.DG	PA12	RIP	PRD	-0.001797	-1.913	4162	4340	98910
Mbuti.DG	PA12	STO	Italy_Villabruna	-0.001159	-1.838	21982	22587	521918
Mbuti.DG	PA12	STO	PRD	-0.002739	-3.274	6542	6960	152509
Mbuti.DG	PA12	STO	RIP	-0.001822	-2.601	13027	13593	31072
Mbuti.DG	Anatolia_Pinarbasi	AC16	Italy_GrottaContinenza_R11.SG	-0.00028	-0.48	16688	16805	415889
Mbuti.DG	Anatolia_Pinarbasi	AC16	Italy_GrottaContinenza_R15.SG	2.8e-05	0.051	24837	24820	618591
Mbuti.DG	Anatolia_Pinarbasi	AC16	Italy_GrottaContinenza_R7.SG	-0.00014	-0.256	24960	25047	619619
Mbuti.DG	Anatolia_Pinarbasi	AC16	Italy_OrienteC	0.000212	0.294	8228	8186	200102
Mbuti.DG	Anatolia_Pinarbasi	AC16	Italy_Uzzo_EM	-0.000259	-0.468	20346	20480	517433
Mbuti.DG	Anatolia_Pinarbasi	AC16	STO	-0.000227	-0.413	22623	22751	564448
Mbuti.DG	Anatolia_Pinarbasi	AC16	Italy_Villabruna	0.000115	0.212	24150	24085	566568
Mbuti.DG	Anatolia_Pinarbasi	AC16	RIP	-0.000174	-0.262	13844	13902	329727
Mbuti.DG	Anatolia_Pinarbasi	AC16	PRD	-0.000482	-0.597	7040	7117	160584
Mbuti.DG	Anatolia_Pinarbasi	Italy_GrottaContinenza_R11.SG	Italy_GrottaContinenza_R15.SG	0.000345	0.621	21183	21003	522161
Mbuti.DG	Anatolia_Pinarbasi	Italy_GrottaContinenza_R11.SG	Italy_GrottaContinenza_R7.SG	1.5e-05	0.028	20301	20293	523331
Mbuti.DG	Anatolia_Pinarbasi	Italy_GrottaContinenza_R11.SG	Italy_OrienteC	0.000302	0.394	6357	6310	154285
Mbuti.DG	Anatolia_Pinarbasi	Italy_GrottaContinenza_R11.SG	Italy_Uzzo_EM	0.000186	0.305	16194	16119	400927
Mbuti.DG	Anatolia_Pinarbasi	Italy_GrottaContinenza_R11.SG	STO	1.8e-05	0.031	18976	18967	463605
Mbuti.DG	Anatolia_Pinarbasi	Italy_GrottaContinenza_R11.SG	Italy_Villabruna	0.000212	0.364	19726	19630	454639
Mbuti.DG	Anatolia_Pinarbasi	Italy_GrottaContinenza_R11.SG	RIP	0.000492	0.673	10924	10798	254866
Mbuti.DG	Anatolia_Pinarbasi	Italy_GrottaContinenza_R11.SG	PRD	3.5e-05	0.04	5430	5425	122043
Mbuti.DG	Anatolia_Pinarbasi	Italy_GrottaContinenza_R15.SG	Italy_GrottaContinenza_R7.SG	-0.000319	-0.608	30610	30858	777328
Mbuti.DG	Anatolia_Pinarbasi	Italy_GrottaContinenza_R15.SG	Italy_OrienteC	-0.000502	-0.703	9330	9445	229272
Mbuti.DG	Anatolia_Pinarbasi	Italy_GrottaContinenza_R15.SG	Italy_Uzzo_EM	-0.000395	-0.698	23939	24174	595217
Mbuti.DG	Anatolia_Pinarbasi	Italy_GrottaContinenza_R15.SG	STO	-0.000629	-1.114	28129	28560	686026
Mbuti.DG	Anatolia_Pinarbasi	Italy_GrottaContinenza_R15.SG	Italy_Villabruna	-0.000332	-0.588	29300	29525	676808
Mbuti.DG	Anatolia_Pinarbasi	Italy_GrottaContinenza_R15.SG	RIP	-0.000222	-0.348	16080	16164	379925
Mbuti.DG	Anatolia_Pinarbasi	Italy_GrottaContinenza_R15.SG	PRD	0.0003	0.409	8074	8019	181899
Mbuti.DG	Anatolia_Pinarbasi	Italy_GrottaContinenza_R7.SG	Italy_OrienteC	-1.9e-05	-0.026	9391	9395	229609
Mbuti.DG	Anatolia_Pinarbasi	Italy_GrottaContinenza_R7.SG	Italy_Uzzo_EM	-8.7e-05	-0.157	23900	23952	596252
Mbuti.DG	Anatolia_Pinarbasi	Italy_GrottaContinenza_R7.SG	STO	-0.000333	-0.565	27988	28217	687331
Mbuti.DG	Anatolia_Pinarbasi	Italy_GrottaContinenza_R7.SG	Italy_Villabruna	0.000172	0.29	29339	29222	677818
Mbuti.DG	Anatolia_Pinarbasi	Italy_GrottaContinenza_R7.SG	RIP	0.00037	0.6	16171	16030	380437
Mbuti.DG	Anatolia_Pinarbasi	Italy_GrottaContinenza_R7.SG	PRD	0.00034	0.463	8018	7956	182099
Mbuti.DG	Anatolia_Pinarbasi	Italy_OrienteC	Italy_Uzzo_EM	2e-05	0.034	6253	6249	196872
Mbuti.DG	Anatolia_Pinarbasi	Italy_OrienteC	STO	-5.6e-05	-0.079	8278	8290	216896
Mbuti.DG	Anatolia_Pinarbasi	Italy_OrienteC	Italy_Villabruna	0.000417	0.573	9614	9522	221492
Mbuti.DG	Anatolia_Pinarbasi	Italy_OrienteC	RIP	0.00031	0.361	5510	5469	129047
Mbuti.DG	Anatolia_Pinarbasi	Italy_OrienteC	PRD	0.001478	1.3	2854	2759	64233
Mbuti.DG	Anatolia_Pinarbasi	Italy_Uzzo_EM	STO	-0.00014	-0.249	20058	20134	547313
Mbuti.DG	Anatolia_Pinarbasi	Italy_Uzzo_EM	Italy_Villabruna	0.00019	0.321	23394	23290	549514
Mbuti.DG	Anatolia_Pinarbasi	Italy_Uzzo_EM	RIP	-3e-06	-0.005	13332	13333	320395
Mbuti.DG	Anatolia_Pinarbasi	Italy_Uzzo_EM	PRD	0.000389	0.489	6810	6750	155830
Mbuti.DG	Anatolia_Pinarbasi	STO	Italy_Villabruna	0.000263	0.441	26815	26652	622066
Mbuti.DG	Anatolia_Pinarbasi	STO	RIP	-8.6e-05	-0.126	15052	15082	350382
Mbuti.DG	Anatolia_Pinarbasi	STO	PRD	0.000476	0.594	7576	7496	169388
Mbuti.DG	Anatolia_Pinarbasi	Italy_Villabruna	RIP	-4.6e-05	-0.067	15176	15193	355116
Mbuti.DG	Anatolia_Pinarbasi	Italy_Villabruna	PRD	3.1e-05	0.04	7696	7691	172397
Mbuti.DG	Anatolia_Pinarbasi	RIP	PRD	0.000361	0.392	4569	4531	104359
Mbuti.DG	Israel_RaqefetCave_Natufian	AC16	Italy_GrottaContinenza_R11.SG	9.3e-05	0.171	10793	10767	276535
Mbuti.DG	Israel_RaqefetCave_Natufian	AC16	Italy_GrottaContinenza_R15.SG	0.000397	0.711	15979	15817	407499
Mbuti.DG	Israel_RaqefetCave_Natufian	AC16	Italy_GrottaContinenza_R7.SG	0.000582	1.135	16097	15859	408117
Mbuti.DG	Israel_RaqefetCave_Natufian	AC16	Italy_OrienteC	0.00117	1.667	5766	5597	144414
Mbuti.DG	Israel_RaqefetCave_Natufian	AC16	Italy_Uzzo_EM	0.001166	2.185	13615	13206	351149
Mbuti.DG	Israel_RaqefetCave_Natufian	AC16	STO	0.000547	1.045	15221	15011	383806
Mbuti.DG	Israel_RaqefetCave_Natufian	AC16	Italy_Villabruna	0.001118	2.031	16280	15849	386210
Mbuti.DG	Israel_RaqefetCave_Natufian	AC16	RIP	0.000734	1.174	9292	9126	225888
Mbuti.DG	Israel_RaqefetCave_Natufian	AC16	PRD	-0.000412	-0.508	4747	4793	111427
Mbuti.DG	Israel_RaqefetCave_Natufian	Italy_GrottaContinenza_R11.SG	Italy_GrottaContinenza_R15.SG	-0.000141	-0.268	13075	13122	335297
Mbuti.DG	Israel_RaqefetCave_Natufian	Italy_GrottaContinenza_R11.SG	Italy_GrottaContinenza_R7.SG	0.000208	0.414	12640	12570	335818
Mbuti.DG	Israel_RaqefetCave_Natufian	Italy_GrottaContinenza_R11.SG	Italy_OrienteC	-0.00056	-0.734	4349	4411	110849
Mbuti.DG	Israel_RaqefetCave_Natufian	Italy_GrottaContinenza_R11.SG	Italy_Uzzo_EM	0.00083	1.522	10630	10406	269480
Mbuti.DG	Israel_RaqefetCave_Natufian	Italy_GrottaContinenza_R11.SG	STO	0.000412	0.76	12338	12211	309875
Mbuti.DG	Israel_RaqefetCave_Natufian	Italy_GrottaContinenza_R11.SG	Italy_Villabruna	0.000621	1.119	13044	12854	306581
Mbuti.DG	Israel_RaqefetCave_Natufian	Italy_GrottaContinenza_R11.SG	RIP	0.001315	1.991	7214	6986	172911
Mbuti.DG	Israel_RaqefetCave_Natufian	Italy_GrottaContinenza_R11.SG	PRD	-4.2e-05	-0.048	3641	3644	84266
Mbuti.DG	Israel_RaqefetCave_Natufian	Italy_GrottaContinenza_R15.SG	Italy_GrottaContinenza_R7.SG	2e-06	0.005	18910	18909	494048
Mbuti.DG	Israel_RaqefetCave_Natufian	Italy_GrottaContinenza_R15.SG	Italy_OrienteC	0.000185	0.27	6485	6455	163226
Mbuti.DG	Israel_RaqefetCave_Natufian	Italy_GrottaContinenza_R15.SG	Italy_Uzzo_EM	0.000805	1.534	15595	15275	396776
Mbuti.DG	Israel_RaqefetCave_Natufian	Italy_GrottaContinenza_R15.SG	STO	0.00019	0.356	18265	18179	454641
Mbuti.DG	Israel_RaqefetCave_Natufian	Italy_GrottaContinenza_R15.SG	Italy_Villabruna	0.000697	1.299	19161	18846	452185
Mbuti.DG	Israel_RaqefetCave_Natufian	Italy_GrottaContinenza_R15.SG	RIP	0.000565	0.963	10526	10382	255278
Mbuti.DG	Israel_RaqefetCave_Natufian	Italy_GrottaContinenza_R15.SG	PRD	0.000414	0.531	5380	5329	124117
Mbuti.DG	Israel_RaqefetCave_Natufian	Italy_GrottaContinenza_R7.SG	Italy_OrienteC	0.00027	0.378	6436	6392	163451
Mbuti.DG	Israel_RaqefetCave_Natufian	Italy_GrottaContinenza_R7.SG	Italy_Uzzo_EM	0.000627	1.215	15512	15263	397278
Mbuti.DG	Israel_RaqefetCave_Natufian	Italy_GrottaContinenza_R7.SG	STO	0.000108	0.217	18110	18061	455330
Mbuti.DG	Israel_RaqefetCave_Natufian	Italy_GrottaContinenza_R7.SG	Italy_Villabruna	0.000541	0.987	19214	18969	452738
Mbuti.DG	Israel_RaqefetCave_Natufian	Italy_GrottaContinenza_R7.SG	RIP	0.000987	1.754	10545	10293	255530
Mbuti.DG	Israel_RaqefetCave_Natufian	Italy_GrottaContinenza_R7.SG	PRD	-0.000183	-0.24	5304	5327	124252
Mbuti.DG	Israel_RaqefetCave_Natufian	Italy_OrienteC	Italy_Uzzo_EM	-0.000202	-0.339	4342	4371	142785
Mbuti.DG	Israel_RaqefetCave_Natufian	Italy_OrienteC	STO	-0.00028	-0.43	5787	5832	157302
Mbuti.DG	Israel_RaqefetCave_Natufian	Italy_OrienteC	Italy_Villabruna	0.000707	0.967	6713	6600	159992
Mbuti.DG	Israel_RaqefetCave_Natufian	Italy_OrienteC	RIP	-0.000325	-0.41	3838	3869	94148
Mbuti.DG	Israel_RaqefetCave_Natufian	Italy_OrienteC	PRD	6e-06	0.005	2021	2021	47309
Mbuti.DG	Israel_RaqefetCave_Natufian	Italy_Uzzo_EM	STO	-0.000809	-1.584	13312	13616	375501
Mbuti.DG	Israel_RaqefetCave_Natufian	Italy_Uzzo_EM	Italy_Villabruna	-0.000179	-0.337	15577	15645	377624
Mbuti.DG	Israel_RaqefetCave_Natufian	Italy_Uzzo_EM	RIP	-0.000228	-0.378	8855	8906	221360
Mbuti.DG	Israel_RaqefetCave_Natufian	Italy_Uzzo_EM	PRD	-0.000974	-1.182	4602	4708	108946
Mbuti.DG	Israel_RaqefetCave_Natufian	STO	Italy_Villabruna	0.000364	0.676	17974	17819	426779
Mbuti.DG	Israel_RaqefetCave_Natufian	STO	RIP	0.000578	0.931	10173	10033	242320
Mbuti.DG	Israel_RaqefetCave_Natufian	STO	PRD	-0.000102	-0.135	5151	5163	118623
Mbuti.DG	Israel_RaqefetCave_Natufian	Italy_Villabruna	RIP	0.000403	0.645	10210	10111	245344
Mbuti.DG	Israel_RaqefetCave_Natufian	Italy_Villabruna	PRD	-0.001377	-1.78	5182	5348	120330
Mbuti.DG	Israel_RaqefetCave_Natufian	RIP	PRD	-0.00088	-0.974	3097	3162	73715
Mbuti.DG	Jew_Iraqi.DG	AC16	Italy_GrottaContinenza_R11.SG	-0.000457	-1.022	20591	20831	524547
Mbuti.DG	Jew_Iraqi.DG	AC16	Italy_GrottaContinenza_R15.SG	0.000192	0.475	30969	30818	782372
Mbuti.DG	Jew_Iraqi.DG	AC16	Italy_GrottaContinenza_R7.SG	0.000436	1.103	31225	30883	783925
Mbuti.DG	Jew_Iraqi.DG	AC16	Italy_OrienteC	0.000283	0.557	9359	9293	233311
Mbuti.DG	Jew_Iraqi.DG	AC16	Italy_Uzzo_EM	0.0004	0.973	24568	24315	632017
Mbuti.DG	Jew_Iraqi.DG	AC16	STO	-0.000127	-0.305	27411	27499	693116
Mbuti.DG	Jew_Iraqi.DG	AC16	Italy_Villabruna	0.000445	1.066	28808	28504	684813
Mbuti.DG	Jew_Iraqi.DG	AC16	RIP	-7.6e-05	-0.163	16413	16444	399316
Mbuti.DG	Jew_Iraqi.DG	AC16	PRD	0.000605	1.085	8351	8235	192636
Mbuti.DG	Jew_Iraqi.DG	Italy_GrottaContinenza_R11.SG	Italy_GrottaContinenza_R15.SG	0.000463	1.137	27793	27470	696648
Mbuti.DG	Jew_Iraqi.DG	Italy_GrottaContinenza_R11.SG	Italy_GrottaContinenza_R7.SG	0.000772	1.953	27002	26463	698336
Mbuti.DG	Jew_Iraqi.DG	Italy_GrottaContinenza_R11.SG	Italy_OrienteC	0.000302	0.567	7366	7311	181663
Mbuti.DG	Jew_Iraqi.DG	Italy_GrottaContinenza_R11.SG	Italy_Uzzo_EM	0.000919	2.105	20013	19555	498710
Mbuti.DG	Jew_Iraqi.DG	Italy_GrottaContinenza_R11.SG	STO	0.000295	0.716	23753	23579	587472
Mbuti.DG	Jew_Iraqi.DG	Italy_GrottaContinenza_R11.SG	Italy_Villabruna	0.000957	2.254	24086	23552	558886
Mbuti.DG	Jew_Iraqi.DG	Italy_GrottaContinenza_R11.SG	RIP	0.000803	1.661	13237	12985	314105
Mbuti.DG	Jew_Iraqi.DG	Italy_GrottaContinenza_R11.SG	PRD	0.001391	2.4	6557	6350	148477
Mbuti.DG	Jew_Iraqi.DG	Italy_GrottaContinenza_R15.SG	Italy_GrottaContinenza_R7.SG	0.00029	0.748	40710	40408	1040688
Mbuti.DG	Jew_Iraqi.DG	Italy_GrottaContinenza_R15.SG	Italy_OrienteC	-0.000464	-0.924	10832	10957	270781
Mbuti.DG	Jew_Iraqi.DG	Italy_GrottaContinenza_R15.SG	Italy_Uzzo_EM	0.000259	0.636	29441	29248	742953
Mbuti.DG	Jew_Iraqi.DG	Italy_GrottaContinenza_R15.SG	STO	-0.000335	-0.787	35253	35545	871232
Mbuti.DG	Jew_Iraqi.DG	Italy_GrottaContinenza_R15.SG	Italy_Villabruna	0.000212	0.512	35751	35574	834722
Mbuti.DG	Jew_Iraqi.DG	Italy_GrottaContinenza_R15.SG	RIP	-0.00021	-0.461	19508	19607	469893
Mbuti.DG	Jew_Iraqi.DG	Italy_GrottaContinenza_R15.SG	PRD	0.000863	1.652	9740	9548	221948
Mbuti.DG	Jew_Iraqi.DG	Italy_GrottaContinenza_R7.SG	Italy_OrienteC	-0.000968	-2.068	10726	10989	271261
Mbuti.DG	Jew_Iraqi.DG	Italy_GrottaContinenza_R7.SG	Italy_Uzzo_EM	-4e-06	-0.01	29238	29242	744427
Mbuti.DG	Jew_Iraqi.DG	Italy_GrottaContinenza_R7.SG	STO	-0.000621	-1.512	34932	35475	873120
Mbuti.DG	Jew_Iraqi.DG	Italy_GrottaContinenza_R7.SG	Italy_Villabruna	-5.4e-05	-0.135	35514	35559	836271
Mbuti.DG	Jew_Iraqi.DG	Italy_GrottaContinenza_R7.SG	RIP	-0.0001	-0.23	19524	19571	470607
Mbuti.DG	Jew_Iraqi.DG	Italy_GrottaContinenza_R7.SG	PRD	0.000515	0.982	9658	9543	222237
Mbuti.DG	Jew_Iraqi.DG	Italy_OrienteC	Italy_Uzzo_EM	0.000471	1.1	7165	7057	228851
Mbuti.DG	Jew_Iraqi.DG	Italy_OrienteC	STO	-9.9e-05	-0.207	9417	9442	253171
Mbuti.DG	Jew_Iraqi.DG	Italy_OrienteC	Italy_Villabruna	0.0006	1.198	10939	10785	257655
Mbuti.DG	Jew_Iraqi.DG	Italy_OrienteC	RIP	0.000316	0.562	6257	6210	149537
Mbuti.DG	Jew_Iraqi.DG	Italy_OrienteC	PRD	0.000834	1.137	3204	3142	74000
Mbuti.DG	Jew_Iraqi.DG	Italy_Uzzo_EM	STO	-0.000556	-1.466	23854	24225	666227
Mbuti.DG	Jew_Iraqi.DG	Italy_Uzzo_EM	Italy_Villabruna	-0.000113	-0.268	27464	27539	660102
Mbuti.DG	Jew_Iraqi.DG	Italy_Uzzo_EM	RIP	-0.000617	-1.351	15638	15875	384735
Mbuti.DG	Jew_Iraqi.DG	Italy_Uzzo_EM	PRD	0.00022	0.398	7941	7900	185400
Mbuti.DG	Jew_Iraqi.DG	STO	Italy_Villabruna	0.000428	1.015	31965	31643	752643
Mbuti.DG	Jew_Iraqi.DG	STO	RIP	5.6e-05	0.121	17959	17935	423455
Mbuti.DG	Jew_Iraqi.DG	STO	PRD	0.000872	1.664	8945	8769	202601
Mbuti.DG	Jew_Iraqi.DG	Italy_Villabruna	RIP	-0.000288	-0.636	17728	17851	424550
Mbuti.DG	Jew_Iraqi.DG	Italy_Villabruna	PRD	0.000246	0.454	9003	8953	204455
Mbuti.DG	Jew_Iraqi.DG	RIP	PRD	0.000704	1.145	5346	5259	123569
Mbuti.DG	Anatolia_Pinarbasi	AC16	PRD.pmd	-0.000266	-0.278	3579	3602	84429
Mbuti.DG	Anatolia_Pinarbasi	AC16	RIP.pmd	-0.000551	-0.661	5446	5520	133622
Mbuti.DG	Anatolia_Pinarbasi	Italy_GrottaContinenza_R11.SG	PRD.pmd	-0.000328	-0.309	2725	2746	63690
Mbuti.DG	Anatolia_Pinarbasi	Italy_GrottaContinenza_R11.SG	RIP.pmd	-0.000115	-0.122	4166	4178	100756
Mbuti.DG	Anatolia_Pinarbasi	Italy_GrottaContinenza_R15.SG	PRD.pmd	2.3e-05	0.027	4069	4067	94859
Mbuti.DG	Anatolia_Pinarbasi	Italy_GrottaContinenza_R15.SG	RIP.pmd	-0.000458	-0.594	6178	6247	150554
Mbuti.DG	Anatolia_Pinarbasi	Italy_GrottaContinenza_R7.SG	PRD.pmd	0.000249	0.28	4039	4015	95049
Mbuti.DG	Anatolia_Pinarbasi	Italy_GrottaContinenza_R7.SG	RIP.pmd	-0.000774	-1.009	6151	6267	150704
Mbuti.DG	Anatolia_Pinarbasi	Italy_OrienteC	PRD.pmd	0.000608	0.429	1443	1422	34184
Mbuti.DG	Anatolia_Pinarbasi	Italy_OrienteC	RIP.pmd	0.000193	0.168	2239	2229	53720
Mbuti.DG	Anatolia_Pinarbasi	Italy_Uzzo_EM	PRD.pmd	0.000679	0.678	3455	3400	82083
Mbuti.DG	Anatolia_Pinarbasi	Italy_Uzzo_EM	RIP.pmd	-0.000665	-0.863	5197	5283	130114
Mbuti.DG	Anatolia_Pinarbasi	Italy_Villabruna	PRD.pmd	0.000608	0.651	3923	3868	90674
Mbuti.DG	Anatolia_Pinarbasi	Italy_Villabruna	RIP.pmd	-0.000647	-0.755	5916	6009	143336
Mbuti.DG	Anatolia_Pinarbasi	PRD	PRD.pmd	0.000153	0.874	244	229	98183
Mbuti.DG	Anatolia_Pinarbasi	RIP	PRD.pmd	0.00046	0.397	2317	2292	55362
Mbuti.DG	Anatolia_Pinarbasi	RIP	RIP.pmd	-0.000101	-0.423	926	942	155886
Mbuti.DG	Anatolia_Pinarbasi	RIP.pmd	PRD.pmd	0.001001	0.66	963	939	24016
Mbuti.DG	Anatolia_Pinarbasi	STO	PRD.pmd	0.001134	1.172	3887	3787	88709
Mbuti.DG	Anatolia_Pinarbasi	STO	RIP.pmd	-0.000656	-0.799	5810	5902	140345
Mbuti.DG	Czech_Vestonice	AC16	PRD.pmd	-0.001959	-2.496	4016	4205	96706
Mbuti.DG	Czech_Vestonice	AC16	RIP.pmd	9e-05	0.133	6306	6292	153414
Mbuti.DG	Czech_Vestonice	Italy_GrottaContinenza_R11.SG	PRD.pmd	-0.002143	-2.45	3007	3164	72938
Mbuti.DG	Czech_Vestonice	Italy_GrottaContinenza_R11.SG	RIP.pmd	0.000904	1.19	4904	4799	115737
Mbuti.DG	Czech_Vestonice	Italy_GrottaContinenza_R15.SG	PRD.pmd	-0.001263	-1.71	4585	4722	108961
Mbuti.DG	Czech_Vestonice	Italy_GrottaContinenza_R15.SG	RIP.pmd	4.1e-05	0.065	7223	7216	173428
Mbuti.DG	Czech_Vestonice	Italy_GrottaContinenza_R7.SG	PRD.pmd	-0.00158	-2.151	4554	4727	109128
Mbuti.DG	Czech_Vestonice	Italy_GrottaContinenza_R7.SG	RIP.pmd	-0.000744	-1.17	7078	7208	173652
Mbuti.DG	Czech_Vestonice	Italy_OrienteC	PRD.pmd	-0.000443	-0.397	1601	1618	38485
Mbuti.DG	Czech_Vestonice	Italy_OrienteC	RIP.pmd	-9.6e-05	-0.109	2524	2530	60644
Mbuti.DG	Czech_Vestonice	Italy_Uzzo_EM	PRD.pmd	-0.001621	-2.069	3875	4027	93829
Mbuti.DG	Czech_Vestonice	Italy_Uzzo_EM	RIP.pmd	-0.000362	-0.532	6066	6120	148861
Mbuti.DG	Czech_Vestonice	Italy_Villabruna	PRD.pmd	-0.000475	-0.619	4458	4507	103858
Mbuti.DG	Czech_Vestonice	Italy_Villabruna	RIP.pmd	0.000582	0.892	6936	6840	164677
Mbuti.DG	Czech_Vestonice	PRD	PRD.pmd	8.6e-05	0.616	284	274	112852
Mbuti.DG	Czech_Vestonice	RIP	PRD.pmd	-0.001146	-1.255	2631	2703	63298
Mbuti.DG	Czech_Vestonice	RIP	RIP.pmd	-8.9e-05	-0.515	1042	1058	179784
Mbuti.DG	Czech_Vestonice	RIP.pmd	PRD	-0.001671	-1.658	2093	2177	50461
Mbuti.DG	Czech_Vestonice	RIP.pmd	PRD.pmd	-0.000897	-0.694	1093	1117	27226
Mbuti.DG	Czech_Vestonice	STO	PRD.pmd	-0.001541	-2.033	4326	4483	101302
Mbuti.DG	Czech_Vestonice	STO	RIP.pmd	-0.000829	-1.172	6739	6872	160576
Mbuti.DG	Georgia_Satsurblia.SG	AC16	PRD.pmd	-0.000548	-0.519	2809	2848	69519
Mbuti.DG	Georgia_Satsurblia.SG	AC16	RIP.pmd	0.000553	0.646	4420	4359	109786
Mbuti.DG	Georgia_Satsurblia.SG	Italy_GrottaContinenza_R11.SG	PRD.pmd	0.000327	0.288	2214	2197	53511
Mbuti.DG	Georgia_Satsurblia.SG	Italy_GrottaContinenza_R11.SG	RIP.pmd	0.000351	0.377	3463	3433	84564
Mbuti.DG	Georgia_Satsurblia.SG	Italy_GrottaContinenza_R15.SG	PRD.pmd	0.001386	1.421	3332	3222	79515
Mbuti.DG	Georgia_Satsurblia.SG	Italy_GrottaContinenza_R15.SG	RIP.pmd	-0.000675	-0.867	5057	5142	126017
Mbuti.DG	Georgia_Satsurblia.SG	Italy_GrottaContinenza_R7.SG	PRD.pmd	-0.000827	-0.824	3306	3372	79674
Mbuti.DG	Georgia_Satsurblia.SG	Italy_GrottaContinenza_R7.SG	RIP.pmd	-0.00032	-0.405	5067	5107	126269
Mbuti.DG	Georgia_Satsurblia.SG	Italy_OrienteC	PRD.pmd	0.001068	0.733	1084	1054	27263
Mbuti.DG	Georgia_Satsurblia.SG	Italy_OrienteC	RIP.pmd	7e-05	0.057	1685	1682	42521
Mbuti.DG	Georgia_Satsurblia.SG	Italy_Uzzo_EM	PRD.pmd	-0.001071	-1.072	2709	2781	67350
Mbuti.DG	Georgia_Satsurblia.SG	Italy_Uzzo_EM	RIP.pmd	-0.000865	-1.043	4220	4312	106313
Mbuti.DG	Georgia_Satsurblia.SG	Italy_Villabruna	PRD.pmd	-0.000301	-0.299	3054	3076	73811
Mbuti.DG	Georgia_Satsurblia.SG	Italy_Villabruna	RIP.pmd	0.000653	0.829	4779	4703	116347
Mbuti.DG	Georgia_Satsurblia.SG	PRD	PRD.pmd	0.000179	0.885	207	193	82345
Mbuti.DG	Georgia_Satsurblia.SG	RIP	PRD.pmd	0.001509	1.269	1850	1782	45139
Mbuti.DG	Georgia_Satsurblia.SG	RIP	RIP.pmd	-0.000529	-2.246	693	762	130610
Mbuti.DG	Georgia_Satsurblia.SG	RIP.pmd	PRD	0.002386	1.83	1485	1400	35715
Mbuti.DG	Georgia_Satsurblia.SG	RIP.pmd	PRD.pmd	0.003483	2.045	770	703	19212
Mbuti.DG	Georgia_Satsurblia.SG	STO	PRD.pmd	0.000884	0.83	3098	3033	73017
Mbuti.DG	Georgia_Satsurblia.SG	STO	RIP.pmd	0.000868	0.998	4754	4654	115333
Mbuti.DG	GoyetQ116-1	AC16	PRD.pmd	8.3e-05	0.074	2713	2708	63729
Mbuti.DG	GoyetQ116-1	AC16	RIP.pmd	-0.00071	-0.783	4045	4116	100263
Mbuti.DG	GoyetQ116-1	Italy_GrottaContinenza_R11.SG	PRD.pmd	-0.001016	-0.838	1866	1912	45133
Mbuti.DG	GoyetQ116-1	Italy_GrottaContinenza_R11.SG	RIP.pmd	-0.002103	-1.903	2865	3014	70836
Mbuti.DG	GoyetQ116-1	Italy_GrottaContinenza_R15.SG	PRD.pmd	-0.001752	-1.66	2771	2889	67294
Mbuti.DG	GoyetQ116-1	Italy_GrottaContinenza_R15.SG	RIP.pmd	-0.002307	-2.599	4265	4510	106289
Mbuti.DG	GoyetQ116-1	Italy_GrottaContinenza_R7.SG	PRD.pmd	-0.002355	-2.122	2758	2917	67401
Mbuti.DG	GoyetQ116-1	Italy_GrottaContinenza_R7.SG	RIP.pmd	-0.001789	-1.999	4264	4454	106296
Mbuti.DG	GoyetQ116-1	Italy_OrienteC	PRD.pmd	-0.000973	-0.593	1078	1103	26178
Mbuti.DG	GoyetQ116-1	Italy_OrienteC	RIP.pmd	-0.001627	-1.271	1647	1713	40785
Mbuti.DG	GoyetQ116-1	Italy_Uzzo_EM	PRD.pmd	-0.001823	-1.607	2519	2632	61794
Mbuti.DG	GoyetQ116-1	Italy_Uzzo_EM	RIP.pmd	-0.002417	-2.639	3878	4113	97187
Mbuti.DG	GoyetQ116-1	Italy_Villabruna	PRD.pmd	-0.001559	-1.438	2789	2892	65789
Mbuti.DG	GoyetQ116-1	Italy_Villabruna	RIP.pmd	-0.000259	-0.283	4271	4298	103635
Mbuti.DG	GoyetQ116-1	PRD	PRD.pmd	-0.000117	-0.507	197	205	69631
Mbuti.DG	GoyetQ116-1	RIP	PRD.pmd	-0.000787	-0.609	1808	1842	43492
Mbuti.DG	GoyetQ116-1	RIP	RIP.pmd	-0.000105	-0.383	702	714	110007
Mbuti.DG	GoyetQ116-1	RIP.pmd	PRD	-0.000798	-0.574	1488	1516	35628
Mbuti.DG	GoyetQ116-1	RIP.pmd	PRD.pmd	-0.001575	-0.884	781	812	19659
Mbuti.DG	GoyetQ116-1	STO	PRD.pmd	-0.002205	-2.016	2649	2789	63614
Mbuti.DG	GoyetQ116-1	STO	RIP.pmd	-0.001728	-1.778	4058	4232	100204
Mbuti.DG	GoyetQ2	AC16	PRD.pmd	-0.001942	-1.495	1776	1860	43251
Mbuti.DG	GoyetQ2	AC16	RIP.pmd	-0.003022	-2.797	2695	2899	67700
Mbuti.DG	GoyetQ2	Italy_GrottaContinenza_R11.SG	PRD.pmd	-0.001925	-1.278	1332	1393	31848
Mbuti.DG	GoyetQ2	Italy_GrottaContinenza_R11.SG	RIP.pmd	-0.004053	-3.261	1974	2175	49574
Mbuti.DG	GoyetQ2	Italy_GrottaContinenza_R15.SG	PRD.pmd	-0.002717	-2.159	1926	2055	47486
Mbuti.DG	GoyetQ2	Italy_GrottaContinenza_R15.SG	RIP.pmd	-0.003692	-3.461	2989	3264	74544
Mbuti.DG	GoyetQ2	Italy_GrottaContinenza_R7.SG	PRD.pmd	-0.003028	-2.389	1963	2107	47628
Mbuti.DG	GoyetQ2	Italy_GrottaContinenza_R7.SG	RIP.pmd	-0.003917	-3.849	2960	3252	74598
Mbuti.DG	GoyetQ2	Italy_OrienteC	PRD.pmd	-0.001009	-0.523	767	785	18130
Mbuti.DG	GoyetQ2	Italy_OrienteC	RIP.pmd	-0.001652	-1.109	1157	1203	28105
Mbuti.DG	GoyetQ2	Italy_Uzzo_EM	PRD.pmd	-0.001581	-1.241	1698	1764	42053
Mbuti.DG	GoyetQ2	Italy_Uzzo_EM	RIP.pmd	-0.003574	-3.275	2589	2825	66053
Mbuti.DG	GoyetQ2	Italy_Villabruna	PRD.pmd	-0.000285	-0.221	1989	2002	46245
Mbuti.DG	GoyetQ2	Italy_Villabruna	RIP.pmd	-0.001189	-1.143	2974	3060	72343
Mbuti.DG	GoyetQ2	PRD	PRD.pmd	-0.000165	-0.593	133	141	49101
Mbuti.DG	GoyetQ2	RIP	PRD.pmd	0.000631	0.429	1224	1206	29117
Mbuti.DG	GoyetQ2	RIP	RIP.pmd	-0.000439	-1.273	472	506	77122
Mbuti.DG	GoyetQ2	RIP.pmd	PRD	0.002744	1.617	1036	972	23508
Mbuti.DG	GoyetQ2	RIP.pmd	PRD.pmd	0.004792	2.256	557	495	12983
Mbuti.DG	GoyetQ2	STO	PRD.pmd	-0.002654	-2.073	1894	2014	44883
Mbuti.DG	GoyetQ2	STO	RIP.pmd	-0.003249	-3.038	2812	3040	70157
Mbuti.DG	Israel_RaqefetCave_Natufian	AC16	PRD.pmd	-0.002134	-2.138	2352	2478	59074
Mbuti.DG	Israel_RaqefetCave_Natufian	AC16	RIP.pmd	-0.000355	-0.424	3654	3687	93138
Mbuti.DG	Israel_RaqefetCave_Natufian	Italy_GrottaContinenza_R11.SG	PRD.pmd	0.000702	0.633	1831	1800	44409
Mbuti.DG	Israel_RaqefetCave_Natufian	Italy_GrottaContinenza_R11.SG	RIP.pmd	-0.000183	-0.196	2775	2788	69769
Mbuti.DG	Israel_RaqefetCave_Natufian	Italy_GrottaContinenza_R15.SG	PRD.pmd	0.000374	0.388	2717	2692	65344
Mbuti.DG	Israel_RaqefetCave_Natufian	Italy_GrottaContinenza_R15.SG	RIP.pmd	0.000153	0.197	4089	4073	103241
Mbuti.DG	Israel_RaqefetCave_Natufian	Italy_GrottaContinenza_R7.SG	PRD.pmd	-0.001161	-1.225	2625	2701	65476
Mbuti.DG	Israel_RaqefetCave_Natufian	Italy_GrottaContinenza_R7.SG	RIP.pmd	-0.00081	-1.046	4007	4091	103309
Mbuti.DG	Israel_RaqefetCave_Natufian	Italy_OrienteC	PRD.pmd	-0.003245	-2.188	987	1069	25389
Mbuti.DG	Israel_RaqefetCave_Natufian	Italy_OrienteC	RIP.pmd	-0.000649	-0.573	1574	1599	39707
Mbuti.DG	Israel_RaqefetCave_Natufian	Italy_Uzzo_EM	PRD.pmd	-0.001842	-1.736	2302	2408	57806
Mbuti.DG	Israel_RaqefetCave_Natufian	Italy_Uzzo_EM	RIP.pmd	-0.001442	-1.746	3517	3648	91226
Mbuti.DG	Israel_RaqefetCave_Natufian	Italy_Villabruna	PRD.pmd	-0.001655	-1.687	2611	2717	63689
Mbuti.DG	Israel_RaqefetCave_Natufian	Italy_Villabruna	RIP.pmd	-0.000149	-0.182	4012	4027	100421
Mbuti.DG	Israel_RaqefetCave_Natufian	PRD	PRD.pmd	-0.000378	-1.722	161	187	67470
Mbuti.DG	Israel_RaqefetCave_Natufian	RIP	PRD.pmd	-0.001243	-1.092	1575	1624	39411
Mbuti.DG	Israel_RaqefetCave_Natufian	RIP	RIP.pmd	-0.000326	-1.231	606	640	106638
Mbuti.DG	Israel_RaqefetCave_Natufian	RIP.pmd	PRD.pmd	-0.000573	-0.342	665	675	17317
Mbuti.DG	Israel_RaqefetCave_Natufian	STO	PRD.pmd	-0.000706	-0.74	2601	2645	62606
Mbuti.DG	Israel_RaqefetCave_Natufian	STO	RIP.pmd	0.000198	0.238	4010	3991	98703
Mbuti.DG	Jew_Iraqi.DG	AC16	PRD.pmd	-2.4e-05	-0.035	4145	4147	100304
Mbuti.DG	Jew_Iraqi.DG	AC16	RIP.pmd	-0.000391	-0.667	6336	6398	159167
Mbuti.DG	Jew_Iraqi.DG	Italy_GrottaContinenza_R11.SG	PRD.pmd	0.001493	2.09	3251	3137	76586
Mbuti.DG	Jew_Iraqi.DG	Italy_GrottaContinenza_R11.SG	RIP.pmd	0.000214	0.347	4978	4952	121636
Mbuti.DG	Jew_Iraqi.DG	Italy_GrottaContinenza_R15.SG	PRD.pmd	0.000844	1.369	4840	4744	114434
Mbuti.DG	Jew_Iraqi.DG	Italy_GrottaContinenza_R15.SG	RIP.pmd	-0.000387	-0.704	7360	7431	182318
Mbuti.DG	Jew_Iraqi.DG	Italy_GrottaContinenza_R7.SG	PRD.pmd	2e-05	0.033	4784	4782	114637
Mbuti.DG	Jew_Iraqi.DG	Italy_GrottaContinenza_R7.SG	RIP.pmd	-0.000645	-1.192	7292	7410	182542
Mbuti.DG	Jew_Iraqi.DG	Italy_OrienteC	PRD.pmd	-0.000546	-0.589	1599	1620	39159
Mbuti.DG	Jew_Iraqi.DG	Italy_OrienteC	RIP.pmd	-0.00032	-0.427	2472	2491	61668
Mbuti.DG	Jew_Iraqi.DG	Italy_Uzzo_EM	PRD.pmd	-0.000107	-0.16	3960	3970	96837
Mbuti.DG	Jew_Iraqi.DG	Italy_Uzzo_EM	RIP.pmd	-0.001143	-2.008	6007	6182	153839
Mbuti.DG	Jew_Iraqi.DG	Italy_Villabruna	PRD.pmd	5e-06	0.008	4509	4509	106694
Mbuti.DG	Jew_Iraqi.DG	Italy_Villabruna	RIP.pmd	-0.000665	-1.199	6819	6931	169080
Mbuti.DG	Jew_Iraqi.DG	PRD	PRD.pmd	0.000104	0.89	295	283	118635
Mbuti.DG	Jew_Iraqi.DG	RIP	PRD.pmd	0.000323	0.419	2702	2681	65055
Mbuti.DG	Jew_Iraqi.DG	RIP	RIP.pmd	-0.000152	-1.008	1046	1075	189113
Mbuti.DG	Jew_Iraqi.DG	RIP.pmd	PRD.pmd	0.000468	0.439	1108	1095	27841
Mbuti.DG	Jew_Iraqi.DG	STO	PRD.pmd	0.000426	0.668	4483	4438	105108
Mbuti.DG	Jew_Iraqi.DG	STO	RIP.pmd	-5.7e-05	-0.101	6843	6853	166701
Mbuti.DG	OKL	AC16	PRD.pmd	-0.006575	-7.059	3801	4402	91373
Mbuti.DG	OKL	AC16	RIP.pmd	-0.003787	-4.231	6019	6567	144495
Mbuti.DG	OKL	Italy_GrottaContinenza_R11.SG	PRD.pmd	-0.00451	-4.138	2907	3214	68070
Mbuti.DG	OKL	Italy_GrottaContinenza_R11.SG	RIP.pmd	-0.001608	-1.765	4661	4834	107310
Mbuti.DG	OKL	Italy_GrottaContinenza_R15.SG	PRD.pmd	-0.004363	-4.927	4382	4825	101475
Mbuti.DG	OKL	Italy_GrottaContinenza_R15.SG	RIP.pmd	-0.002198	-2.777	6903	7256	160864
Mbuti.DG	OKL	Italy_GrottaContinenza_R7.SG	PRD.pmd	-0.005005	-5.495	4340	4849	101671
Mbuti.DG	OKL	Italy_GrottaContinenza_R7.SG	RIP.pmd	-0.002902	-3.658	6812	7279	161015
Mbuti.DG	OKL	Italy_OrienteC	PRD.pmd	-0.004912	-3.659	1534	1713	36550
Mbuti.DG	OKL	Italy_OrienteC	RIP.pmd	-0.001664	-1.535	2459	2554	57365
Mbuti.DG	OKL	Italy_Uzzo_EM	PRD.pmd	-0.005456	-5.711	3707	4190	88565
Mbuti.DG	OKL	Italy_Uzzo_EM	RIP.pmd	-0.001818	-2.213	5939	6194	140160
Mbuti.DG	OKL	Italy_Villabruna	PRD.pmd	-0.001495	-1.558	4331	4475	96661
Mbuti.DG	OKL	Italy_Villabruna	RIP.pmd	0.000891	1.041	6765	6629	152710
Mbuti.DG	OKL	PRD	PRD.pmd	0.000513	3.092	307	253	105131
Mbuti.DG	OKL	RIP	PRD.pmd	-0.001955	-1.692	2618	2735	60111
Mbuti.DG	OKL	RIP	RIP.pmd	7.5e-05	0.35	1073	1061	166691
Mbuti.DG	OKL	RIP.pmd	PRD	-0.002378	-2.062	2091	2205	48058
Mbuti.DG	OKL	RIP.pmd	PRD.pmd	-0.001133	-0.758	1097	1127	26027
Mbuti.DG	OKL	STO	PRD.pmd	-0.004543	-4.782	4142	4572	94698
Mbuti.DG	OKL	STO	RIP.pmd	-0.002473	-2.957	6472	6841	149433
Mbuti.DG	PA12	AC16	PRD.pmd	-0.001412	-1.436	3284	3396	79414
Mbuti.DG	PA12	AC16	RIP.pmd	-0.001028	-1.172	5053	5182	125345
Mbuti.DG	PA12	Italy_GrottaContinenza_R11.SG	PRD.pmd	-0.0022	-1.949	2350	2476	57303
Mbuti.DG	PA12	Italy_GrottaContinenza_R11.SG	RIP.pmd	-0.001875	-1.88	3617	3786	90298
Mbuti.DG	PA12	Italy_GrottaContinenza_R15.SG	PRD.pmd	-0.00137	-1.359	3531	3648	85376
Mbuti.DG	PA12	Italy_GrottaContinenza_R15.SG	RIP.pmd	-0.001951	-2.317	5361	5625	135111
Mbuti.DG	PA12	Italy_GrottaContinenza_R7.SG	PRD.pmd	-0.001146	-1.2	3535	3633	85538
Mbuti.DG	PA12	Italy_GrottaContinenza_R7.SG	RIP.pmd	-0.001268	-1.501	5402	5574	135223
Mbuti.DG	PA12	Italy_OrienteC	PRD.pmd	-0.000104	-0.071	1288	1292	31636
Mbuti.DG	PA12	Italy_OrienteC	RIP.pmd	-0.001818	-1.577	1973	2062	49481
Mbuti.DG	PA12	Italy_Uzzo_EM	PRD.pmd	-0.002387	-2.417	3118	3302	77054
Mbuti.DG	PA12	Italy_Uzzo_EM	RIP.pmd	-0.001946	-2.278	4794	5031	121487
Mbuti.DG	PA12	Italy_Villabruna	PRD.pmd	-0.000751	-0.79	3450	3512	82068
Mbuti.DG	PA12	Italy_Villabruna	RIP.pmd	-0.000693	-0.824	5308	5398	129246
Mbuti.DG	PA12	PRD	PRD.pmd	-4.2e-05	-0.203	232	235	88397
Mbuti.DG	PA12	RIP	PRD.pmd	-0.001027	-0.873	2149	2203	52715
Mbuti.DG	PA12	RIP	RIP.pmd	-0.00024	-0.951	831	864	139955
Mbuti.DG	PA12	RIP.pmd	PRD	-0.001405	-1.117	1748	1808	42581
Mbuti.DG	PA12	RIP.pmd	PRD.pmd	-0.001242	-0.754	905	934	23186
Mbuti.DG	PA12	STO	PRD.pmd	-0.002533	-2.497	3350	3553	80252
Mbuti.DG	PA12	STO	RIP.pmd	-0.002494	-2.823	5114	5430	126623
Mbuti.DG	Russia_AfontovaGora3	AC16	PRD.pmd	2.2e-05	0.016	1302	1302	32770
Mbuti.DG	Russia_AfontovaGora3	AC16	RIP.pmd	-0.000359	-0.321	1983	2001	51591
Mbuti.DG	Russia_AfontovaGora3	Italy_GrottaContinenza_R11.SG	PRD.pmd	-0.000375	-0.233	929	938	23646
Mbuti.DG	Russia_AfontovaGora3	Italy_GrottaContinenza_R11.SG	RIP.pmd	0.001381	1.022	1504	1452	37302
Mbuti.DG	Russia_AfontovaGora3	Italy_GrottaContinenza_R15.SG	PRD.pmd	0.001422	1.099	1430	1380	35420
Mbuti.DG	Russia_AfontovaGora3	Italy_GrottaContinenza_R15.SG	RIP.pmd	0.000639	0.588	2218	2182	56035
Mbuti.DG	Russia_AfontovaGora3	Italy_GrottaContinenza_R7.SG	PRD.pmd	0.00063	0.491	1422	1400	35451
Mbuti.DG	Russia_AfontovaGora3	Italy_GrottaContinenza_R7.SG	RIP.pmd	0.000448	0.417	2200	2175	56047
Mbuti.DG	Russia_AfontovaGora3	Italy_OrienteC	PRD.pmd	0.001345	0.662	569	550	14371
Mbuti.DG	Russia_AfontovaGora3	Italy_OrienteC	RIP.pmd	0.001044	0.61	901	878	22432
Mbuti.DG	Russia_AfontovaGora3	Italy_Uzzo_EM	PRD.pmd	0.000363	0.273	1262	1250	32097
Mbuti.DG	Russia_AfontovaGora3	Italy_Uzzo_EM	RIP.pmd	0.000203	0.182	1974	1964	50562
Mbuti.DG	Russia_AfontovaGora3	Italy_Villabruna	PRD.pmd	0.00132	1.005	1446	1399	35567
Mbuti.DG	Russia_AfontovaGora3	Italy_Villabruna	RIP.pmd	0.000573	0.533	2215	2183	56043
Mbuti.DG	Russia_AfontovaGora3	PRD	PRD.pmd	-2.2e-05	-0.071	86	87	36664
Mbuti.DG	Russia_AfontovaGora3	RIP	PRD.pmd	0.000512	0.31	833	821	22054
Mbuti.DG	Russia_AfontovaGora3	RIP	RIP.pmd	-9e-06	-0.024	362	362	57972
Mbuti.DG	Russia_AfontovaGora3	RIP.pmd	PRD	-0.00046	-0.24	700	708	18038
Mbuti.DG	Russia_AfontovaGora3	RIP.pmd	PRD.pmd	-0.000819	-0.351	353	361	9867
Mbuti.DG	Russia_AfontovaGora3	STO	PRD.pmd	-0.000651	-0.475	1384	1406	34112
Mbuti.DG	Russia_AfontovaGora3	STO	RIP.pmd	0.000246	0.212	2133	2120	53756
Mbuti.DG	Russia_Kostenki14	AC16	PRD.pmd	-0.000865	-0.892	3959	4041	94783
Mbuti.DG	Russia_Kostenki14	AC16	RIP.pmd	-0.000641	-0.793	6073	6169	150501
Mbuti.DG	Russia_Kostenki14	Italy_GrottaContinenza_R11.SG	PRD.pmd	-0.000173	-0.165	3026	3038	72533
Mbuti.DG	Russia_Kostenki14	Italy_GrottaContinenza_R11.SG	RIP.pmd	-0.0003	-0.346	4748	4783	115304
Mbuti.DG	Russia_Kostenki14	Italy_GrottaContinenza_R15.SG	PRD.pmd	-3.1e-05	-0.036	4546	4549	108549
Mbuti.DG	Russia_Kostenki14	Italy_GrottaContinenza_R15.SG	RIP.pmd	-0.000968	-1.298	7041	7209	173009
Mbuti.DG	Russia_Kostenki14	Italy_GrottaContinenza_R7.SG	PRD.pmd	-0.001446	-1.647	4523	4681	108721
Mbuti.DG	Russia_Kostenki14	Italy_GrottaContinenza_R7.SG	RIP.pmd	-0.000375	-0.508	7028	7093	173181
Mbuti.DG	Russia_Kostenki14	Italy_OrienteC	PRD.pmd	0.000702	0.506	1521	1496	36404
Mbuti.DG	Russia_Kostenki14	Italy_OrienteC	RIP.pmd	-0.000737	-0.666	2331	2374	57439
Mbuti.DG	Russia_Kostenki14	Italy_Uzzo_EM	PRD.pmd	-0.001368	-1.412	3740	3865	91459
Mbuti.DG	Russia_Kostenki14	Italy_Uzzo_EM	RIP.pmd	-0.000531	-0.687	5840	5917	145354
Mbuti.DG	Russia_Kostenki14	Italy_Villabruna	PRD.pmd	-0.000862	-0.956	4318	4405	101347
Mbuti.DG	Russia_Kostenki14	Italy_Villabruna	RIP.pmd	-0.000979	-1.255	6569	6726	160648
Mbuti.DG	Russia_Kostenki14	PRD	PRD.pmd	-0.000192	-1.085	258	280	112471
Mbuti.DG	Russia_Kostenki14	RIP	PRD.pmd	1.9e-05	0.017	2533	2532	61036
Mbuti.DG	Russia_Kostenki14	RIP	RIP.pmd	-0.000325	-1.635	977	1036	179334
Mbuti.DG	Russia_Kostenki14	RIP.pmd	PRD	-4.6e-05	-0.037	2026	2028	48378
Mbuti.DG	Russia_Kostenki14	RIP.pmd	PRD.pmd	-2.9e-05	-0.019	1036	1037	25927
Mbuti.DG	Russia_Kostenki14	STO	PRD.pmd	-0.000694	-0.746	4277	4346	99544
Mbuti.DG	Russia_Kostenki14	STO	RIP.pmd	-0.001202	-1.54	6468	6658	157913
Mbuti.DG	Russia_MA1.SG	AC16	PRD.pmd	0.001784	1.729	3156	3025	73132
Mbuti.DG	Russia_MA1.SG	AC16	RIP.pmd	5e-06	0.006	4683	4682	115827
Mbuti.DG	Russia_MA1.SG	Italy_GrottaContinenza_R11.SG	PRD.pmd	0.002272	2.102	2432	2305	55591
Mbuti.DG	Russia_MA1.SG	Italy_GrottaContinenza_R11.SG	RIP.pmd	-1.1e-05	-0.011	3646	3647	88285
Mbuti.DG	Russia_MA1.SG	Italy_GrottaContinenza_R15.SG	PRD.pmd	0.000742	0.733	3595	3534	83080
Mbuti.DG	Russia_MA1.SG	Italy_GrottaContinenza_R15.SG	RIP.pmd	-0.001266	-1.504	5354	5522	132187
Mbuti.DG	Russia_MA1.SG	Italy_GrottaContinenza_R7.SG	PRD.pmd	0.001116	1.117	3571	3478	83223
Mbuti.DG	Russia_MA1.SG	Italy_GrottaContinenza_R7.SG	RIP.pmd	-0.000619	-0.732	5331	5413	132307
Mbuti.DG	Russia_MA1.SG	Italy_OrienteC	PRD.pmd	0.000262	0.167	1222	1214	28827
Mbuti.DG	Russia_MA1.SG	Italy_OrienteC	RIP.pmd	-0.000591	-0.49	1819	1846	45275
Mbuti.DG	Russia_MA1.SG	Italy_Uzzo_EM	PRD.pmd	0.000814	0.78	3002	2944	70685
Mbuti.DG	Russia_MA1.SG	Italy_Uzzo_EM	RIP.pmd	-0.000975	-1.066	4459	4568	112170
Mbuti.DG	Russia_MA1.SG	Italy_Villabruna	PRD.pmd	0.000861	0.847	3389	3322	78016
Mbuti.DG	Russia_MA1.SG	Italy_Villabruna	RIP.pmd	-0.000167	-0.2	5047	5068	123370
Mbuti.DG	Russia_MA1.SG	PRD	PRD.pmd	0.000238	1.238	219	198	86015
Mbuti.DG	Russia_MA1.SG	RIP	PRD.pmd	0.002668	2.131	2071	1944	47617
Mbuti.DG	Russia_MA1.SG	RIP	RIP.pmd	-0.000392	-1.589	762	816	137003
Mbuti.DG	Russia_MA1.SG	RIP.pmd	PRD	0.001312	0.968	1607	1557	37889
Mbuti.DG	Russia_MA1.SG	RIP.pmd	PRD.pmd	0.003604	2.038	851	777	20450
Mbuti.DG	Russia_MA1.SG	STO	PRD.pmd	0.000986	0.913	3367	3292	76593
Mbuti.DG	Russia_MA1.SG	STO	RIP.pmd	-4.1e-05	-0.049	5033	5038	121415
Mbuti.DG	Spain_ElMiron	AC16	PRD.pmd	-0.004546	-4.245	2966	3301	73770
Mbuti.DG	Spain_ElMiron	AC16	RIP.pmd	-0.003644	-4.017	4570	4995	116780
Mbuti.DG	Spain_ElMiron	Italy_GrottaContinenza_R11.SG	PRD.pmd	-0.003408	-2.941	2199	2383	53888
Mbuti.DG	Spain_ElMiron	Italy_GrottaContinenza_R11.SG	RIP.pmd	-0.003287	-3.181	3424	3704	85106
Mbuti.DG	Spain_ElMiron	Italy_GrottaContinenza_R15.SG	PRD.pmd	-0.003022	-3.094	3302	3545	80462
Mbuti.DG	Spain_ElMiron	Italy_GrottaContinenza_R15.SG	RIP.pmd	-0.003032	-3.454	5143	5530	127849
Mbuti.DG	Spain_ElMiron	Italy_GrottaContinenza_R7.SG	PRD.pmd	-0.003918	-3.725	3249	3565	80566
Mbuti.DG	Spain_ElMiron	Italy_GrottaContinenza_R7.SG	RIP.pmd	-0.004125	-4.639	5015	5543	127909
Mbuti.DG	Spain_ElMiron	Italy_OrienteC	PRD.pmd	-0.004665	-3.047	1249	1395	31298
Mbuti.DG	Spain_ElMiron	Italy_OrienteC	RIP.pmd	-0.003685	-3.014	1970	2153	49440
Mbuti.DG	Spain_ElMiron	Italy_Uzzo_EM	PRD.pmd	-0.007171	-6.664	2784	3301	72097
Mbuti.DG	Spain_ElMiron	Italy_Uzzo_EM	RIP.pmd	-0.006006	-6.695	4337	5023	114234
Mbuti.DG	Spain_ElMiron	Italy_Villabruna	PRD.pmd	-0.001423	-1.383	3435	3549	80295
Mbuti.DG	Spain_ElMiron	Italy_Villabruna	RIP.pmd	-0.001333	-1.505	5193	5363	127369
Mbuti.DG	Spain_ElMiron	PRD	PRD.pmd	-8.7e-05	-0.383	233	240	83268
Mbuti.DG	Spain_ElMiron	RIP	PRD.pmd	-0.00111	-0.921	2058	2113	49570
Mbuti.DG	Spain_ElMiron	RIP	RIP.pmd	-0.000148	-0.584	819	839	132437
Mbuti.DG	Spain_ElMiron	RIP.pmd	PRD	-0.001132	-0.855	1674	1720	40242
Mbuti.DG	Spain_ElMiron	RIP.pmd	PRD.pmd	6.6e-05	0.039	887	886	22029
Mbuti.DG	Spain_ElMiron	STO	PRD.pmd	-0.005359	-4.957	3139	3550	76630
Mbuti.DG	Spain_ElMiron	STO	RIP.pmd	-0.005568	-6.333	4776	5453	121562

## Sheet: G.Epigravettian_Vestonice_F4
Outgroup	Epigravettian	Vestonice	PA12	F4	Z	nBABA	nABBA	nSNPs
Mbuti.DG	AC16	Czech_Vestonice	PA12	0.000161	0.253	26462	26376	532082
Mbuti.DG	Italy_GrottaContinenza_R11.SG	Czech_Vestonice	PA12	0.00065	1.037	20542	20276	409177
Mbuti.DG	Italy_GrottaContinenza_R15.SG	Czech_Vestonice	PA12	0.000604	0.965	30579	30211	608955
Mbuti.DG	Italy_GrottaContinenza_R7.SG	Czech_Vestonice	PA12	0.000718	1.152	30713	30276	609990
Mbuti.DG	Italy_OrienteC	Czech_Vestonice	PA12	0.001656	2.181	10010	9681	198836
Mbuti.DG	Italy_Uzzo_EM	Czech_Vestonice	PA12	0.001591	2.561	25910	25094	513280
Mbuti.DG	STO	Czech_Vestonice	PA12	0.000893	1.38	28095	27596	558213
Mbuti.DG	Italy_Villabruna	Czech_Vestonice	PA12	0.000733	1.178	28187	27776	562230
Mbuti.DG	RIP	Czech_Vestonice	PA12	0.000394	0.608	16397	16528	332505
Mbuti.DG	PRD	Czech_Vestonice	PA12	0.000882	1.132	8023	7879	162636
Mbuti.DG	RIP.pmd	Czech_Vestonice	PA12	-0.00092	-1.146	6492	6616	135344
Mbuti.DG	PRD.pmd	Czech_Vestonice	PA12	-0.000144	-0.154	4036	4049	85582

## Sheet: H.Magdalenian_F4
Outgroup	Epigravettian	Testpop	Magdalenian	F4	Z	nBABA	nABBA	nSNPs
Mbuti.DG	Italy_Villabruna	FRL	GoyetQ2	0.004953	6.226	10301	9271	207952
Mbuti.DG	Italy_Villabruna	FRL	Brillenhohle.pmd	0.000674	0.196	257	253	5375
Mbuti.DG	Italy_Villabruna	FRL	Burkhardtshohle.pmd	0.005773	1.831	326	286	6986
Mbuti.DG	Italy_Villabruna	FRL	HohleFels	0.005922	4.845	3085	2723	61133
Mbuti.DG	Italy_Villabruna	FRL	Rigney1	0.004566	2.499	1184	1077	23482
Mbuti.DG	Italy_Villabruna	FRL	MAZ001	-0.008796	-3.865	757	891	15196
Mbuti.DG	Italy_Villabruna	FRL	MAZ003	0.003668	3.389	3606	3326	76317
Mbuti.DG	Italy_Villabruna	FRL	Spain_ElMiron	0.010437	12.565	19630	15838	363299
Mbuti.DG	Italy_Villabruna	FRL	LMA	0.011858	6.458	1032	789	20513
Mbuti.DG	Italy_Villabruna	FRL	PIN.nopmd	0.006424	3.54	1241	1083	24538
Mbuti.DG	AC16	FRL	GoyetQ2	0.00565	6.509	9607	8517	192852
Mbuti.DG	AC16	FRL	Brillenhohle.pmd	0.003941	1.139	266	243	5624
Mbuti.DG	AC16	FRL	Burkhardtshohle.pmd	0.007863	2.642	358	300	7355
Mbuti.DG	AC16	FRL	HohleFels	0.006232	5.209	3340	2932	65390
Mbuti.DG	AC16	FRL	Rigney1	0.006551	3.754	1308	1141	25370
Mbuti.DG	AC16	FRL	MAZ001	-0.003983	-1.707	761	819	14489
Mbuti.DG	AC16	FRL	MAZ003	0.002909	2.39	3420	3209	72451
Mbuti.DG	AC16	FRL	Spain_ElMiron	0.011658	13.209	18004	14159	329790
Mbuti.DG	AC16	FRL	LMA	0.015536	8.087	1027	722	19600
Mbuti.DG	AC16	FRL	PIN.nopmd	0.005477	2.986	1178	1050	23462
Mbuti.DG	Italy_Villabruna	GoyetQ116-1	GoyetQ2	0.005421	6.103	9744	8728	187412
Mbuti.DG	Italy_Villabruna	GoyetQ116-1	Brillenhohle.pmd	0.002918	0.837	322	304	6183
Mbuti.DG	Italy_Villabruna	GoyetQ116-1	Burkhardtshohle.pmd	0.008779	2.894	407	338	7845
Mbuti.DG	Italy_Villabruna	GoyetQ116-1	HohleFels	0.00608	5.296	3730	3303	70291
Mbuti.DG	Italy_Villabruna	GoyetQ116-1	Rigney1	0.007592	4.205	1431	1229	26673
Mbuti.DG	Italy_Villabruna	GoyetQ116-1	MAZ001	-0.002879	-1.247	737	778	14124
Mbuti.DG	Italy_Villabruna	GoyetQ116-1	MAZ003	0.003605	3.225	3526	3271	70844
Mbuti.DG	Italy_Villabruna	GoyetQ116-1	Spain_ElMiron	0.01064	12.077	18073	14636	323037
Mbuti.DG	Italy_Villabruna	GoyetQ116-1	LMA	0.009454	4.398	1003	824	18907
Mbuti.DG	Italy_Villabruna	GoyetQ116-1	PIN.nopmd	0.005551	3.099	1146	1019	22877
Mbuti.DG	AC16	GoyetQ116-1	GoyetQ2	0.007449	7.868	9391	8076	176598
Mbuti.DG	AC16	GoyetQ116-1	Brillenhohle.pmd	0.004311	1.285	333	305	6505
Mbuti.DG	AC16	GoyetQ116-1	Burkhardtshohle.pmd	0.008958	3	442	368	8233
Mbuti.DG	AC16	GoyetQ116-1	HohleFels	0.006733	5.96	3997	3491	75237
Mbuti.DG	AC16	GoyetQ116-1	Rigney1	0.007273	4.246	1548	1339	28712
Mbuti.DG	AC16	GoyetQ116-1	MAZ001	-0.001245	-0.502	721	738	13626
Mbuti.DG	AC16	GoyetQ116-1	MAZ003	0.004855	4.146	3424	3094	68018
Mbuti.DG	AC16	GoyetQ116-1	Spain_ElMiron	0.013422	15.193	17052	13053	297880
Mbuti.DG	AC16	GoyetQ116-1	LMA	0.012619	6.075	998	768	18259
Mbuti.DG	AC16	GoyetQ116-1	PIN.nopmd	0.009655	5.143	1164	951	22056
Mbuti.DG	Brillenhohle.pmd	GoyetQ116-1	FRL	0.008997	2.581	274	227	5289
Mbuti.DG	Burkhardtshohle.pmd	GoyetQ116-1	FRL	0.006738	2.165	340	294	6796
Mbuti.DG	HohleFels	GoyetQ116-1	FRL	0.004997	3.891	3028	2729	59831
Mbuti.DG	Rigney1	GoyetQ116-1	FRL	0.006577	3.693	1135	984	22888
Mbuti.DG	MAZ001	GoyetQ116-1	FRL	0.001896	0.798	488	467	11031
Mbuti.DG	MAZ003	GoyetQ116-1	FRL	0.004416	3.529	2648	2405	55057
Mbuti.DG	Spain_ElMiron	GoyetQ116-1	FRL	0.003603	4.148	11272	10431	233463
Mbuti.DG	LMA	GoyetQ116-1	FRL	0.00555	2.606	705	622	14881
Mbuti.DG	PIN.nopmd	GoyetQ116-1	FRL	0.002491	1.274	845	800	18032
Mbuti.DG	AC16	GoyetQ2	Brillenhohle.pmd	-0.004073	-1.007	132	146	3417
Mbuti.DG	AC16	GoyetQ2	Burkhardtshohle.pmd	0.000701	0.21	167	164	4458
Mbuti.DG	AC16	GoyetQ2	HohleFels	0.000229	0.197	1514	1505	39812
Mbuti.DG	AC16	GoyetQ2	Rigney1	0.000183	0.095	590	588	15277
Mbuti.DG	AC16	GoyetQ2	MAZ003	-0.002679	-1.945	1890	2012	45812
Mbuti.DG	AC16	GoyetQ2	Spain_ElMiron	0.006149	7.242	10230	8918	213384
Mbuti.DG	AC16	GoyetQ2	LMA	0.003856	1.69	549	502	12350
Mbuti.DG	AC16	GoyetQ2	PIN.nopmd	0.001842	0.904	612	584	14976

## Sheet: I.OKL_F4
Outgroup	Epigravettian/Magdalenian	OKL	WHG	F4	Z	nBABA	nABBA	nSNPs
Mbuti.DG	Italy_Villabruna	OKL	AAT	4.6e-05	0.071	33518	33486	709515
Mbuti.DG	Italy_Villabruna	OKL	ACR.pmd	-0.000407	-0.206	691	697	15548
Mbuti.DG	Italy_Villabruna	OKL	BerryAuBac	0.002028	0.831	406	389	8618
Mbuti.DG	Italy_Villabruna	OKL	Bockstein	-0.004468	-3.514	1703	1886	40811
Mbuti.DG	Italy_Villabruna	OKL	BRM	-0.012877	-11.956	3811	4885	83382
Mbuti.DG	Italy_Villabruna	OKL	Chaudardes1.pmd	-0.000883	-0.49	819	835	18007
Mbuti.DG	Italy_Villabruna	OKL	Croatia_VelaSpila	0.000936	1.206	13926	13660	284106
Mbuti.DG	Italy_Villabruna	OKL	CRW	-0.002809	-4.052	20479	21714	439692
Mbuti.DG	Italy_Villabruna	OKL	Denmark_Syltholm	-0.001696	-1.966	7120	7374	149824
Mbuti.DG	Italy_Villabruna	OKL	DOG	-0.000507	-0.893	20333	20555	437879
Mbuti.DG	Italy_Villabruna	OKL	DRI	-0.00271	-4.257	27011	28566	573975
Mbuti.DG	Italy_Villabruna	OKL	England_AvelinesHole.SG	-0.00258	-3.047	5770	6089	123546
Mbuti.DG	Italy_Villabruna	OKL	England_GoughsCave.SG	-0.000161	-0.243	33195	33310	712881
Mbuti.DG	Italy_Villabruna	OKL	England_KentsCavern.SG	-0.002523	-2.277	2926	3091	65298
Mbuti.DG	Italy_Villabruna	OKL	Falkenstein	0.000528	0.463	2757	2727	57741
Mbuti.DG	Italy_Villabruna	OKL	FRM	0.001695	1.784	4152	4003	87673
Mbuti.DG	Italy_Villabruna	OKL	Germany_BadDurrenberg	-0.000627	-0.952	29255	29643	619592
Mbuti.DG	Italy_Villabruna	OKL	Germany_Blatterhohle	-0.005809	-8.905	30203	33946	644309
Mbuti.DG	Italy_Villabruna	OKL	Germany_Bottendorf	-0.002037	-1.927	3259	3400	68804
Mbuti.DG	Italy_Villabruna	OKL	GFW_2	-0.002041	-3.089	26607	27764	567118
Mbuti.DG	Italy_Villabruna	OKL	Hungary_Koros	-0.003341	-5.717	30634	32773	640346
Mbuti.DG	Italy_Villabruna	OKL	Iboussieres	-8e-06	-0.005	1190	1190	24681
Mbuti.DG	Italy_Villabruna	OKL	Ireland_Mesolithic	0.00021	0.355	34896	34743	732364
Mbuti.DG	Italy_Villabruna	OKL	Italy_Uzzo_LM	-0.000236	-0.508	34715	34887	727098
Mbuti.DG	Italy_Villabruna	OKL	KRZ	-0.006577	-4.391	1433	1640	31501
Mbuti.DG	Italy_Villabruna	OKL	Luxembourg_Loschbour.DG	0.000463	0.746	32468	32147	693324
Mbuti.DG	Italy_Villabruna	OKL	MAF	0.000982	1.209	8350	8175	178361
Mbuti.DG	Italy_Villabruna	OKL	MesoFr	-0.000362	-0.591	18507	18650	396907
Mbuti.DG	Italy_Villabruna	OKL	MPR	-0.000156	-0.234	32838	32947	693702
Mbuti.DG	Italy_Villabruna	OKL	OST001	-0.006012	-6.364	6143	6925	130129
Mbuti.DG	Italy_Villabruna	OKL	OST003	-0.004291	-6.346	25498	27826	542491
Mbuti.DG	Italy_Villabruna	OKL	Poland_Konary_N22.SG	-0.004558	-6.413	28907	31731	619590
Mbuti.DG	Italy_Villabruna	OKL	Ranchot88	0.002023	2.095	5603	5367	116747
Mbuti.DG	Italy_Villabruna	OKL	Rochedane	0.001461	1.623	5344	5177	114161
Mbuti.DG	Italy_Villabruna	OKL	Romania_IronGates	-0.005745	-11.157	34987	39193	732167
Mbuti.DG	Italy_Villabruna	OKL	Romania_MaguraBuduiasca	-0.008313	-10.575	15852	18669	338919
Mbuti.DG	Italy_Villabruna	OKL	Scotland_CnocCoig.SG	-0.00439	-2.397	831	911	18282
Mbuti.DG	Italy_Villabruna	OKL	Serbia_IronGates	-0.004079	-8.745	35012	37998	732256
Mbuti.DG	Italy_Villabruna	OKL	Switzerland_Bichon.SG	-0.000388	-0.572	33730	34014	731456
Mbuti.DG	Italy_Villabruna	OKL	Wales_Ogof	-0.000334	-0.464	13405	13501	285671
Mbuti.DG	Italy_Villabruna	OKL	WCX	0.00055	0.626	4756	4698	105506
Mbuti.DG	Italy_Villabruna	OKL	England_AvelinesHole	-0.003464	-4.282	6980	7497	149254
Mbuti.DG	Italy_Villabruna	OKL	England_GoughsCave	0.000598	0.9	27935	27579	595059
Mbuti.DG	Italy_Villabruna	OKL	England_KentsCavern	-0.001981	-1.825	3135	3272	69069
Mbuti.DG	Italy_Villabruna	OKL	Scotland_CnocCoig	-0.004058	-1.838	524	570	11417
Mbuti.DG	Italy_Villabruna	OKL	WOL	-0.003462	-4.167	8330	8936	174895
Mbuti.DG	GoyetQ2	OKL	AAT	-0.000793	-1.144	14047	14293	311032
Mbuti.DG	GoyetQ2	OKL	ACR.pmd	0.001529	0.577	322	310	7465
Mbuti.DG	GoyetQ2	OKL	BerryAuBac	0.005946	1.697	219	192	4562
Mbuti.DG	GoyetQ2	OKL	Bockstein	-0.005999	-3.768	829	957	21323
Mbuti.DG	GoyetQ2	OKL	BRM	-0.006467	-4.766	1841	2096	39347
Mbuti.DG	GoyetQ2	OKL	Chaudardes1.pmd	0.001907	0.81	417	399	9383
Mbuti.DG	GoyetQ2	OKL	Croatia_VelaSpila	-0.003611	-4.222	5744	6210	128964
Mbuti.DG	GoyetQ2	OKL	CRW	-0.002175	-2.872	9021	9457	200536
Mbuti.DG	GoyetQ2	OKL	Denmark_Syltholm	-0.001094	-1.104	3534	3616	74828
Mbuti.DG	GoyetQ2	OKL	DOG	-0.000321	-0.516	8992	9056	200427
Mbuti.DG	GoyetQ2	OKL	DRI	-0.001854	-2.733	11663	12139	256808
Mbuti.DG	GoyetQ2	OKL	England_AvelinesHole.SG	-0.001968	-1.837	2582	2693	56573
Mbuti.DG	GoyetQ2	OKL	England_GoughsCave.SG	-9.9e-05	-0.143	14032	14063	313010
Mbuti.DG	GoyetQ2	OKL	England_KentsCavern.SG	-0.002373	-1.622	1306	1377	30152
Mbuti.DG	GoyetQ2	OKL	Falkenstein	0.00239	1.626	1438	1366	30184
Mbuti.DG	GoyetQ2	OKL	FRM	0.001746	1.394	1891	1819	41592
Mbuti.DG	GoyetQ2	OKL	Germany_BadDurrenberg	-0.000471	-0.68	12565	12695	276031
Mbuti.DG	GoyetQ2	OKL	Germany_Blatterhohle	-0.003212	-4.761	13271	14189	285824
Mbuti.DG	GoyetQ2	OKL	Germany_Bottendorf	-0.000302	-0.214	1480	1490	31892
Mbuti.DG	GoyetQ2	OKL	GFW_2	-0.001937	-2.904	11475	11967	253784
Mbuti.DG	GoyetQ2	OKL	Hungary_Koros	-0.004299	-6.866	12935	14159	284821
Mbuti.DG	GoyetQ2	OKL	Iboussieres	0.00188	0.833	610	586	12622
Mbuti.DG	GoyetQ2	OKL	Ireland_Mesolithic	-0.001327	-2.266	14404	14829	320633
Mbuti.DG	GoyetQ2	OKL	Italy_Uzzo_LM	-0.002579	-5.263	14207	15029	318498
Mbuti.DG	GoyetQ2	OKL	KRZ	-0.001008	-0.521	713	728	15004
Mbuti.DG	GoyetQ2	OKL	Luxembourg_Loschbour.DG	0.000228	0.352	13750	13681	304412
Mbuti.DG	GoyetQ2	OKL	MAF	0.000839	0.861	3667	3599	81561
Mbuti.DG	GoyetQ2	OKL	MesoFr	0.000688	0.938	7971	7850	176068
Mbuti.DG	GoyetQ2	OKL	MPR	-0.001465	-2.069	13772	14219	305128
Mbuti.DG	GoyetQ2	OKL	OST001	-0.004249	-3.941	2798	3057	61025
Mbuti.DG	GoyetQ2	OKL	OST003	-0.001887	-2.808	11158	11615	242410
Mbuti.DG	GoyetQ2	OKL	Poland_Konary_N22.SG	-0.003121	-4.395	12414	13261	271629
Mbuti.DG	GoyetQ2	OKL	Ranchot88	0.001248	1.101	2806	2731	60166
Mbuti.DG	GoyetQ2	OKL	Rochedane	0.000946	0.865	2528	2475	56015
Mbuti.DG	GoyetQ2	OKL	Romania_IronGates	-0.006334	-12.75	14583	16613	320539
Mbuti.DG	GoyetQ2	OKL	Romania_MaguraBuduiasca	-0.005215	-6.545	7250	8065	156420
Mbuti.DG	GoyetQ2	OKL	Scotland_CnocCoig.SG	-0.003668	-1.413	358	388	8173
Mbuti.DG	GoyetQ2	OKL	Serbia_IronGates	-0.004736	-10.158	14609	16128	320560
Mbuti.DG	GoyetQ2	OKL	Switzerland_Bichon.SG	3.4e-05	0.05	14306	14295	320231
Mbuti.DG	GoyetQ2	OKL	Wales_Ogof	-0.000315	-0.383	5909	5950	131425
Mbuti.DG	GoyetQ2	OKL	WCX	-0.000698	-0.644	2123	2157	49980
Mbuti.DG	GoyetQ2	OKL	England_AvelinesHole	-0.001741	-1.8	3114	3233	68134
Mbuti.DG	GoyetQ2	OKL	England_GoughsCave	0.000253	0.358	12040	11973	266884
Mbuti.DG	GoyetQ2	OKL	England_KentsCavern	-0.000937	-0.653	1426	1456	32163
Mbuti.DG	GoyetQ2	OKL	Scotland_CnocCoig	-0.003572	-1.107	221	239	5069
Mbuti.DG	GoyetQ2	OKL	WOL	-0.003061	-3.094	3697	3946	81409
Mbuti.DG	AC16	OKL	AAT	-0.001133	-1.528	30801	31543	654728
Mbuti.DG	AC16	OKL	ACR.pmd	-0.000382	-0.187	651	656	14628
Mbuti.DG	AC16	OKL	BerryAuBac	0.001899	0.734	434	417	9119
Mbuti.DG	AC16	OKL	Bockstein	-0.007043	-5.562	1585	1861	39116
Mbuti.DG	AC16	OKL	BRM	-0.016359	-14.181	3416	4681	77342
Mbuti.DG	AC16	OKL	Chaudardes1.pmd	-0.000531	-0.29	914	924	19547
Mbuti.DG	AC16	OKL	Croatia_VelaSpila	-0.003074	-3.718	12332	13131	260007
Mbuti.DG	AC16	OKL	CRW	-0.005856	-7.702	18528	20929	410048
Mbuti.DG	AC16	OKL	Denmark_Syltholm	-0.003353	-4.026	8591	9194	179994
Mbuti.DG	AC16	OKL	DOG	-0.001769	-2.996	19069	19798	412219
Mbuti.DG	AC16	OKL	DRI	-0.005452	-7.75	24138	27010	526822
Mbuti.DG	AC16	OKL	England_AvelinesHole.SG	-0.00494	-5.382	5152	5702	111452
Mbuti.DG	AC16	OKL	England_GoughsCave.SG	-0.000982	-1.365	30989	31641	663984
Mbuti.DG	AC16	OKL	England_KentsCavern.SG	-0.00367	-3.098	2649	2866	59029
Mbuti.DG	AC16	OKL	Falkenstein	0.00053	0.469	3038	3004	62611
Mbuti.DG	AC16	OKL	FRM	0.000566	0.508	3722	3677	79531
Mbuti.DG	AC16	OKL	Germany_BadDurrenberg	-0.001985	-2.769	26233	27344	560011
Mbuti.DG	AC16	OKL	Germany_Blatterhohle	-0.009227	-12.321	26450	31826	582561
Mbuti.DG	AC16	OKL	Germany_Bottendorf	-0.00531	-4.471	2869	3199	62096
Mbuti.DG	AC16	OKL	GFW_2	-0.003957	-5.475	24962	27087	536980
Mbuti.DG	AC16	OKL	Hungary_Koros	-0.007982	-11.883	26387	31005	578551
Mbuti.DG	AC16	OKL	Iboussieres	0.000866	0.561	1367	1344	27437
Mbuti.DG	AC16	OKL	Ireland_Mesolithic	-0.001084	-1.623	32485	33228	685379
Mbuti.DG	AC16	OKL	Italy_Uzzo_LM	-0.001759	-3.308	32323	33520	680582
Mbuti.DG	AC16	OKL	KRZ	-0.007949	-5.216	1330	1565	29533
Mbuti.DG	AC16	OKL	Luxembourg_Loschbour.DG	0.001334	1.872	30958	30095	646936
Mbuti.DG	AC16	OKL	MAF	0.00049	0.542	7630	7550	163337
Mbuti.DG	AC16	OKL	MesoFr	-0.000284	-0.401	17109	17212	363857
Mbuti.DG	AC16	OKL	MPR	-0.001328	-1.682	30255	31107	641816
Mbuti.DG	AC16	OKL	OST001	-0.009103	-9.493	5361	6435	117912
Mbuti.DG	AC16	OKL	OST003	-0.007403	-10.094	22285	25915	490320
Mbuti.DG	AC16	OKL	Poland_Konary_N22.SG	-0.007846	-10.987	26260	30814	580387
Mbuti.DG	AC16	OKL	Ranchot88	0.001374	1.414	6164	5989	126896
Mbuti.DG	AC16	OKL	Rochedane	-0.000758	-0.81	5219	5305	112848
Mbuti.DG	AC16	OKL	Romania_IronGates	-0.010739	-18.443	31169	38525	685038
Mbuti.DG	AC16	OKL	Romania_MaguraBuduiasca	-0.013315	-16.529	13512	17569	304764
Mbuti.DG	AC16	OKL	Scotland_CnocCoig.SG	-0.006259	-3.425	743	848	16715
Mbuti.DG	AC16	OKL	Serbia_IronGates	-0.008925	-16.938	31247	37359	684883
Mbuti.DG	AC16	OKL	Switzerland_Bichon.SG	0.000554	0.758	32199	31820	684317
Mbuti.DG	AC16	OKL	Wales_Ogof	-0.001268	-1.537	12101	12428	257957
Mbuti.DG	AC16	OKL	WCX	-0.001278	-1.37	4454	4582	99984
Mbuti.DG	AC16	OKL	England_AvelinesHole	-0.005531	-6.181	6213	6957	134602
Mbuti.DG	AC16	OKL	England_GoughsCave	-0.000607	-0.839	25029	25355	535988
Mbuti.DG	AC16	OKL	England_KentsCavern	-0.003454	-3.014	2795	3009	62039
Mbuti.DG	AC16	OKL	Scotland_CnocCoig	-0.004312	-1.855	476	520	10354
Mbuti.DG	AC16	OKL	WOL	-0.006612	-7.113	7323	8374	158869
Mbuti.DG	Italy_Villabruna	OKL	BRM.pmd	-0.012695	-8.164	1417	1822	31921
Mbuti.DG	Italy_Villabruna	OKL	DOB	-0.001332	-2.016	29126	29958	624470
Mbuti.DG	Italy_Villabruna	OKL	GFW_1	-0.001617	-3.096	33285	34420	702184
Mbuti.DG	Italy_Villabruna	OKL	OST002	-0.006614	-9.611	26776	30599	577970
Mbuti.DG	Italy_Villabruna	OKL	WOL.pmd	-0.003216	-1.702	808	864	17586
Mbuti.DG	AC16	OKL	BRM.pmd	-0.016347	-10.027	1248	1731	29557
Mbuti.DG	AC16	OKL	DOB	-0.002141	-2.933	27305	28556	584111
Mbuti.DG	AC16	OKL	GFW_1	-0.004031	-6.544	30209	32822	648317
Mbuti.DG	AC16	OKL	OST002	-0.009683	-12.834	24462	29713	542284
Mbuti.DG	AC16	OKL	WOL.pmd	-0.007217	-3.5	720	835	16033
Mbuti.DG	GoyetQ2	OKL	BRM.pmd	-0.0068	-3.274	683	787	15199
Mbuti.DG	GoyetQ2	OKL	DOB	-0.000479	-0.697	12605	12738	278111
Mbuti.DG	GoyetQ2	OKL	GFW_1	-0.001301	-2.347	14137	14538	308385
Mbuti.DG	GoyetQ2	OKL	OST002	-0.003365	-4.884	12040	12911	258801
Mbuti.DG	GoyetQ2	OKL	WOL.pmd	-0.003388	-1.347	366	395	8425

## Sheet: J.WHG_F4
Outgroup	Magdalenian	Epigravettian	WHG	F4	Z	nBABA	nABBA	nSNPs
Mbuti.DG	GoyetQ2	Italy_Villabruna	AAT	0.002777	4.001	15061	14166	322318
Mbuti.DG	GoyetQ2	Italy_Villabruna	ACR.pmd	0.003866	1.38	331	302	7663
Mbuti.DG	GoyetQ2	Italy_Villabruna	BerryAuBac	0.009051	2.323	221	181	4484
Mbuti.DG	GoyetQ2	Italy_Villabruna	Bockstein	-0.004241	-2.458	836	929	21879
Mbuti.DG	GoyetQ2	Italy_Villabruna	BRM	-0.003738	-2.54	1943	2094	40347
Mbuti.DG	GoyetQ2	Italy_Villabruna	Chaudardes1.pmd	0.005669	2.113	421	370	9077
Mbuti.DG	GoyetQ2	Italy_Villabruna	Croatia_VelaSpila	-0.000318	-0.37	5928	5970	133667
Mbuti.DG	GoyetQ2	Italy_Villabruna	CRW	0.001197	1.463	9597	9349	206778
Mbuti.DG	GoyetQ2	Italy_Villabruna	Denmark_Syltholm	0.0017	1.569	3319	3200	69774
Mbuti.DG	GoyetQ2	Italy_Villabruna	DOG	0.002851	4.126	9567	8981	205407
Mbuti.DG	GoyetQ2	Italy_Villabruna	DRI	0.002073	2.869	12668	12115	266633
Mbuti.DG	GoyetQ2	Italy_Villabruna	England_AvelinesHole.SG	0.000494	0.425	2812	2783	59232
Mbuti.DG	GoyetQ2	Italy_Villabruna	England_GoughsCave.SG	0.003602	4.861	15374	14210	323358
Mbuti.DG	GoyetQ2	Italy_Villabruna	England_KentsCavern.SG	0.001462	0.983	1451	1405	31599
Mbuti.DG	GoyetQ2	Italy_Villabruna	Falkenstein	0.004392	2.767	1392	1263	29342
Mbuti.DG	GoyetQ2	Italy_Villabruna	FRM	0.004493	3.367	2006	1812	43140
Mbuti.DG	GoyetQ2	Italy_Villabruna	Germany_BadDurrenberg	0.003236	4.464	13690	12755	289139
Mbuti.DG	GoyetQ2	Italy_Villabruna	Germany_Blatterhohle	0.000587	0.873	14437	14261	299491
Mbuti.DG	GoyetQ2	Italy_Villabruna	Germany_Bottendorf	0.001939	1.284	1570	1505	33270
Mbuti.DG	GoyetQ2	Italy_Villabruna	GFW_2	0.001699	2.341	12229	11786	260649
Mbuti.DG	GoyetQ2	Italy_Villabruna	Hungary_Koros	-0.000717	-1.127	13831	14045	298422
Mbuti.DG	GoyetQ2	Italy_Villabruna	Iboussieres	0.000861	0.338	568	558	12072
Mbuti.DG	GoyetQ2	Italy_Villabruna	Ireland_Mesolithic	0.002173	3.386	15405	14687	330434
Mbuti.DG	GoyetQ2	Italy_Villabruna	Italy_Uzzo_LM	0.000812	1.532	14980	14714	328447
Mbuti.DG	GoyetQ2	Italy_Villabruna	KRZ	0.001016	0.473	742	726	15386
Mbuti.DG	GoyetQ2	Italy_Villabruna	Luxembourg_Loschbour.DG	0.003812	5.666	14819	13621	314181
Mbuti.DG	GoyetQ2	Italy_Villabruna	MAF	0.004058	3.889	3893	3550	84537
Mbuti.DG	GoyetQ2	Italy_Villabruna	MesoFr	0.003846	5.158	8665	7958	183702
Mbuti.DG	GoyetQ2	Italy_Villabruna	MPR	0.001985	2.769	14625	13999	315588
Mbuti.DG	GoyetQ2	Italy_Villabruna	OKL	0.00336	5.258	13743	12761	292053
Mbuti.DG	GoyetQ2	Italy_Villabruna	OST001	-2.7e-05	-0.024	3051	3053	63680
Mbuti.DG	GoyetQ2	Italy_Villabruna	OST003	0.001401	1.933	12091	11736	253883
Mbuti.DG	GoyetQ2	Italy_Villabruna	Poland_Konary_N22.SG	0.000729	0.982	13245	13042	279730
Mbuti.DG	GoyetQ2	Italy_Villabruna	Ranchot88	0.003918	3.236	2793	2565	58349
Mbuti.DG	GoyetQ2	Italy_Villabruna	Rochedane	0.003057	2.482	2612	2440	56467
Mbuti.DG	GoyetQ2	Italy_Villabruna	Romania_IronGates	-0.002686	-5.013	15332	16220	330368
Mbuti.DG	GoyetQ2	Italy_Villabruna	Romania_MaguraBuduiasca	-0.001925	-2.299	7839	8155	164293
Mbuti.DG	GoyetQ2	Italy_Villabruna	Scotland_CnocCoig.SG	0.000939	0.346	392	384	8432
Mbuti.DG	GoyetQ2	Italy_Villabruna	Serbia_IronGates	-0.001183	-2.351	15365	15756	330412
Mbuti.DG	GoyetQ2	Italy_Villabruna	Switzerland_Bichon.SG	0.003512	4.869	15650	14490	330098
Mbuti.DG	GoyetQ2	Italy_Villabruna	Wales_Ogof	0.003713	4.244	6569	6058	137663
Mbuti.DG	GoyetQ2	Italy_Villabruna	WCX	0.002221	1.968	2184	2070	51327
Mbuti.DG	GoyetQ2	Italy_Villabruna	England_AvelinesHole	6.1e-05	0.057	3376	3371	71313
Mbuti.DG	GoyetQ2	Italy_Villabruna	England_GoughsCave	0.004246	5.643	13344	12155	280062
Mbuti.DG	GoyetQ2	Italy_Villabruna	England_KentsCavern	0.002281	1.562	1580	1503	33849
Mbuti.DG	GoyetQ2	Italy_Villabruna	Scotland_CnocCoig	0.002664	0.757	259	245	5271
Mbuti.DG	GoyetQ2	Italy_Villabruna	WOL	-7.9e-05	-0.076	3960	3967	84859
Mbuti.DG	GoyetQ2	AC16	AAT	0.000811	1.059	12843	12607	291249
Mbuti.DG	GoyetQ2	AC16	ACR.pmd	0.002812	0.976	294	274	7158
Mbuti.DG	GoyetQ2	AC16	BerryAuBac	0.007405	1.951	234	200	4648
Mbuti.DG	GoyetQ2	AC16	Bockstein	-0.003396	-1.883	826	896	20822
Mbuti.DG	GoyetQ2	AC16	BRM	-0.007018	-4.747	1686	1946	37130
Mbuti.DG	GoyetQ2	AC16	Chaudardes1.pmd	0.001088	0.412	421	410	9612
Mbuti.DG	GoyetQ2	AC16	Croatia_VelaSpila	-0.00128	-1.368	5333	5488	120972
Mbuti.DG	GoyetQ2	AC16	CRW	-0.000836	-1.005	8424	8583	189868
Mbuti.DG	GoyetQ2	AC16	Denmark_Syltholm	0.000728	0.661	3644	3587	78314
Mbuti.DG	GoyetQ2	AC16	DOG	0.001673	2.385	8450	8131	190309
Mbuti.DG	GoyetQ2	AC16	DRI	0.000178	0.226	10942	10899	240950
Mbuti.DG	GoyetQ2	AC16	England_AvelinesHole.SG	-0.000264	-0.22	2398	2412	53112
Mbuti.DG	GoyetQ2	AC16	England_GoughsCave.SG	0.001947	2.546	13220	12649	293430
Mbuti.DG	GoyetQ2	AC16	England_KentsCavern.SG	-0.001874	-1.218	1222	1276	28343
Mbuti.DG	GoyetQ2	AC16	Falkenstein	0.003814	2.441	1424	1306	31068
Mbuti.DG	GoyetQ2	AC16	FRM	0.001841	1.315	1739	1667	38925
Mbuti.DG	GoyetQ2	AC16	Germany_BadDurrenberg	0.000914	1.219	11537	11301	258977
Mbuti.DG	GoyetQ2	AC16	Germany_Blatterhohle	-0.001582	-2.099	12443	12867	268056
Mbuti.DG	GoyetQ2	AC16	Germany_Bottendorf	-0.00157	-1.035	1343	1390	29914
Mbuti.DG	GoyetQ2	AC16	GFW_2	-0.000398	-0.521	10696	10792	241468
Mbuti.DG	GoyetQ2	AC16	Hungary_Koros	-0.002554	-3.61	12081	12764	267145
Mbuti.DG	GoyetQ2	AC16	Iboussieres	0.001229	0.51	595	579	13001
Mbuti.DG	GoyetQ2	AC16	Ireland_Mesolithic	0.000384	0.571	13326	13210	300419
Mbuti.DG	GoyetQ2	AC16	Italy_Uzzo_LM	-0.00106	-1.898	12919	13236	299009
Mbuti.DG	GoyetQ2	AC16	KRZ	0.000198	0.093	663	660	14297
Mbuti.DG	GoyetQ2	AC16	Luxembourg_Loschbour.DG	0.001831	2.584	12514	11992	285292
Mbuti.DG	GoyetQ2	AC16	MAF	0.001738	1.657	3289	3156	76563
Mbuti.DG	GoyetQ2	AC16	MesoFr	0.00211	2.597	7286	6937	165342
Mbuti.DG	GoyetQ2	AC16	MPR	-4e-06	-0.006	12575	12577	285673
Mbuti.DG	GoyetQ2	AC16	OKL	0.001283	1.949	11732	11389	267684
Mbuti.DG	GoyetQ2	AC16	OST001	-0.001874	-1.473	2645	2752	57617
Mbuti.DG	GoyetQ2	AC16	OST003	-0.000602	-0.753	10441	10579	227842
Mbuti.DG	GoyetQ2	AC16	Poland_Konary_N22.SG	-0.001447	-1.836	11642	12010	254435
Mbuti.DG	GoyetQ2	AC16	Ranchot88	0.002875	2.388	2837	2659	62025
Mbuti.DG	GoyetQ2	AC16	Rochedane	0.002656	2.041	2457	2311	55018
Mbuti.DG	GoyetQ2	AC16	Romania_IronGates	-0.004701	-7.749	13546	14958	300326
Mbuti.DG	GoyetQ2	AC16	Romania_MaguraBuduiasca	-0.003769	-4.227	6830	7384	147004
Mbuti.DG	GoyetQ2	AC16	Scotland_CnocCoig.SG	0.000673	0.226	351	346	7550
Mbuti.DG	GoyetQ2	AC16	Serbia_IronGates	-0.00308	-5.482	13624	14549	300349
Mbuti.DG	GoyetQ2	AC16	Switzerland_Bichon.SG	0.001666	2.215	13231	12731	300057
Mbuti.DG	GoyetQ2	AC16	Wales_Ogof	0.000932	1.001	5447	5332	123604
Mbuti.DG	GoyetQ2	AC16	WCX	0.001021	0.858	1975	1925	48199
Mbuti.DG	GoyetQ2	AC16	England_AvelinesHole	-0.000611	-0.567	2864	2903	63941
Mbuti.DG	GoyetQ2	AC16	England_GoughsCave	0.002295	2.899	11238	10663	250357
Mbuti.DG	GoyetQ2	AC16	England_KentsCavern	0.000128	0.082	1355	1351	30251
Mbuti.DG	GoyetQ2	AC16	Scotland_CnocCoig	0.001765	0.473	225	216	4698
Mbuti.DG	GoyetQ2	AC16	WOL	-0.001528	-1.361	3453	3570	76609
Mbuti.DG	GoyetQ2	Italy_Villabruna	BRM.pmd	-0.003789	-1.686	734	793	15636
Mbuti.DG	GoyetQ2	Italy_Villabruna	DOB	0.002933	4.005	13553	12713	286586
Mbuti.DG	GoyetQ2	Italy_Villabruna	GFW_1	0.002334	4.008	15160	14414	319777
Mbuti.DG	GoyetQ2	Italy_Villabruna	OST002	0.000393	0.538	12705	12601	266040
Mbuti.DG	GoyetQ2	Italy_Villabruna	WOL.pmd	0.001543	0.59	403	389	8831
Mbuti.DG	GoyetQ2	AC16	BRM.pmd	-0.005246	-2.429	645	720	14352
Mbuti.DG	GoyetQ2	AC16	DOB	0.001102	1.464	11691	11402	262391
Mbuti.DG	GoyetQ2	AC16	GFW_1	0.000504	0.801	13074	12929	289085
Mbuti.DG	GoyetQ2	AC16	OST002	-0.001645	-2.127	11267	11669	244435
Mbuti.DG	GoyetQ2	AC16	WOL.pmd	-0.000533	-0.181	363	368	7973

[truncated: 6 more sheets: K.EHG_F4, L.TTK_F4, M.Neanderthal_F4, N.Neanderthal_F4ratio, O.NearEast_affinity, P.Tianyuan_affinity]
