# Supplementary material for: Palaeogenomics of Upper Palaeolithic to Neolithic European hunter-gatherers
Source: Springer Nature journal article supplement (doi:10.1038/s41586-023-05726-0), 2023-03-01
Supplement: MOESM5 [file 41586_2023_5726_MOESM5_ESM.xlsx]

## Sheet: A.Epigravettian_PMR_Het
ID	n1240K	nHet	pHet		ID1	ID2	nSNP	nMismatch	pMismatch	Group		t-test		t	p
PRD001	37570	3946.99	0.105057		Vestonice13_d	DLV005	92945	17969	0.193329	Gravettian		Gravettian	Group1	5.37	<0.001
RIP001	171664	17404	0.101384		Ostuni2_d	Ostuni1_d	8454	1691	0.200024	Gravettian		Group1	Group2	12.44	<0.001
Villabruna	152229	12914	0.0848327		Ostuni2_d	PA12	12256	2476	0.202023	Gravettian		Group2	Group3	8.62	<0.001
R11	333658	32747	0.0981454		Pavlov1_d	Vestonice43_d	11734	2424	0.206579	Gravettian
R15	1049845	98780	0.0940901		Vestonice16	DLV006	493727	102017	0.206626	Gravettian
R7	1057189	90464	0.0855703		Ostuni1_d	PA12	232007	48187	0.207696	Gravettian
AC16	746894	66867	0.0895268		Vestonice16	DLV005	557364	115816	0.207792	Gravettian
STO001	684369	60258	0.088049		Vestonice16	Vestonice13_d	98003	20430	0.208463	Gravettian
UZZ096	7113	266	0.0373963		Pavlov1_d	Vestonice13_d	9674	2030	0.209841	Gravettian
UZZ5054	527241	37318	0.0707798		Vestonice13_d	I1577	30796	6502	0.211131	Gravettian
OrienteC	65464	5332	0.0814493		Vestonice13_d	DLV006	82696	17499	0.211606	Gravettian
					DLV005	DLV006	493915	105286	0.213166	Gravettian
					Ostuni2_d	I1577	4420	946	0.214027	Gravettian
					Pavlov1_d	Ostuni2_d	1644	359	0.21837	Gravettian
					Pavlov1_d	DLV006	39331	8608	0.21886	Gravettian
					I1577	DLV006	154149	33826	0.219437	Gravettian
					Pavlov1_d	DLV005	44390	9764	0.219959	Gravettian
					I1577	DLV005	173022	38272	0.221197	Gravettian
					Pavlov1_d	Ostuni1_d	26382	5840	0.221363	Gravettian
					Pavlov1_d	I1577	14506	3214	0.221563	Gravettian
					Vestonice16	I1577	174945	38792	0.221738	Gravettian
					Vestonice16	Pavlov1_d	47849	10626	0.222074	Gravettian
					Vestonice43_d	I1577	35095	7817	0.222738	Gravettian
					Vestonice13_d	Ostuni1_d	52657	11789	0.223883	Gravettian
					Pavlov1_d	PA12	40326	9044	0.224272	Gravettian
					Vestonice43_d	Ostuni1_d	62364	14004	0.224553	Gravettian
					Vestonice43_d	Ostuni2_d	3671	827	0.225279	Gravettian
					Ostuni2_d	DLV005	13373	3018	0.225679	Gravettian
					Vestonice13_d	Vestonice43_d	22697	5149	0.226858	Gravettian
					Vestonice16	Ostuni2_d	14624	3323	0.227229	Gravettian
					Ostuni2_d	DLV006	11913	2709	0.227399	Gravettian
					Vestonice13_d	Ostuni2_d	3078	700	0.22742	Gravettian
					Vestonice16	Ostuni1_d	273199	62562	0.228998	Gravettian
					Ostuni1_d	DLV005	256444	58741	0.22906	Gravettian
					Vestonice13_d	PA12	82751	19009	0.229713	Gravettian
					Ostuni1_d	DLV006	228210	52438	0.22978	Gravettian
					Vestonice43_d	PA12	95895	22050	0.229939	Gravettian
					Vestonice43_d	DLV006	93472	21627	0.231374	Gravettian
					Ostuni1_d	I1577	85091	19700	0.231517	Gravettian
					Vestonice43_d	DLV005	105452	24475	0.232096	Gravettian
					Vestonice16	Vestonice43_d	111401	26040	0.23375	Gravettian
					DLV006	PA12	447992	104790	0.23391	Gravettian
					Vestonice16	PA12	507645	118756	0.233935	Gravettian
					I1577	PA12	154922	36586	0.236158	Gravettian
					DLV005	PA12	503803	118984	0.236172	Gravettian
					UZZ096	RIP001	34846	7016	0.201343	Group1
					UZZ5054	RIP001	387627	78338	0.202096	Group1
					AC16	RIP001	406617	82199	0.202153	Group1
					R7.SG	RIP001	479384	98287	0.205028	Group1
					OrienteC	RIP001	152184	31295	0.205639	Group1
					R15.SG	RIP001	478648	98480	0.205746	Group1
					R11.SG	RIP001	319851	65813	0.205761	Group1
					UZZ096	PRD001	17566	3643	0.207389	Group1
					Villabruna	UZZ5054	664116	137858	0.207581	Group1
					Villabruna	UZZ096	56932	11830	0.207792	Group1
					Villabruna	AC16	697335	145188	0.208204	Group1
					Villabruna	RIP001	431852	89939	0.208263	Group1
					STO001	RIP001	431176	90190	0.209172	Group1
					UZZ5054	PRD001	186676	39306	0.210557	Group1
					PRD001	RIP001	125627	26507	0.210998	Group1
					Villabruna	OrienteC	262248	55355	0.211079	Group1
					Villabruna	STO001	766357	162059	0.211467	Group1
					OrienteC	PRD001	75232	15978	0.212383	Group1
					Villabruna	R7.SG	851766	180955	0.212447	Group1
					AC16	PRD001	195983	41698	0.212763	Group1
					Villabruna	R11.SG	569137	121291	0.213114	Group1
					Villabruna	R15.SG	850153	181402	0.213376	Group1
					R7.SG	PRD001	226210	48277	0.213417	Group1
					R15.SG	PRD001	225881	48281	0.213745	Group1
					R11.SG	PRD001	151122	32370	0.214198	Group1
					STO001	PRD001	206113	44795	0.217332	Group1
					Villabruna	PRD001	207819	45382	0.218373	Group1
					R11.SG	R7.SG	715089	135945	0.190109	Group2
					UZZ5054	AC16	637405	121655	0.19086	Group2
					UZZ096	AC16	54985	10513	0.191198	Group2
					R15.SG	R7.SG	1065531	205609	0.192964	Group2
					R11.SG	UZZ096	41657	8089	0.194181	Group2
					R7.SG	UZZ5054	749350	145569	0.19426	Group2
					R7.SG	UZZ096	61471	11942	0.19427	Group2
					R15.SG	UZZ096	61379	11937	0.19448	Group2
					R15.SG	UZZ5054	747830	145838	0.195015	Group2
					R15.SG	AC16	798622	155844	0.195141	Group2
					R11.SG	AC16	535370	104713	0.19559	Group2
					R11.SG	UZZ5054	501901	98174	0.195604	Group2
					R7.SG	AC16	800217	156619	0.195721	Group2
					STO001	AC16	706905	138674	0.196171	Group2
					R11.SG	R15.SG	713320	140067	0.196359	Group2
					OrienteC	AC16	237593	46902	0.197405	Group2
					R7.SG	OrienteC	276349	54752	0.198126	Group2
					R15.SG	OrienteC	275866	54714	0.198335	Group2
					R11.SG	STO001	599985	119975	0.199963	Group2
					R11.SG	OrienteC	185077	37021	0.20003	Group2
					R7.SG	STO001	891671	178364	0.200033	Group2
					R15.SG	STO001	889729	179386	0.201619	Group2
					OrienteC	UZZ5054	230740	35303	0.152999	Group3
					UZZ096	UZZ5054	53065	8270	0.155847	Group3
					UZZ096	OrienteC	21471	3487	0.162405	Group3
					UZZ5054	STO001	670779	119771	0.178555	Group3
					UZZ096	STO001	57105	10348	0.18121	Group3
					OrienteC	STO001	257889	47639	0.184727	Group3

## Sheet: B.HapROH_summary
max_roh	Individual	Population	sum_roh>4	n_roh>4	sum_roh>8	n_roh>8	sum_roh>12	n_roh>12	sum_roh>20	n_roh>20	age	clst	lat	lon	nSNPs	group	sum_roh_4-8
15.1253	GoyetQ116-1	GoyetQ116-1	389.635	56	154.965	14	54.5491	4	0	0	34795	Goyet Q116-1	50.45	5.01	489601	preLGM	234.67
24.0954	Vestonice16	Vestonice	388.439	42	268.334	19	192.959	12	44.4099	2	30010	Vestonice	48.53	16.39	732091	preLGM	120.105
24.9548	DLV005	Vestonice	356.304	40	230.858	17	130.556	7	48.0725	2	30870	Vestonice	48.53	16.39	740891	preLGM	125.446
19.3611	FRL006	FRL	221.546	30	110.681	9	65.9851	4	0	0	28737.5	Fournol	44.53	1	582118	preLGM	110.865
21.0699	DLV006	Vestonice	215.396	26	125.993	9	71.6051	4	42.0911	2	30870	Vestonice	48.53	16.39	664418	preLGM	89.4027
26.3839	Sunghir2	Sunghir	213.798	26	122.874	9	77.7238	4	51.3933	2	34234	Sunghir	56.18	40.5	1136035	preLGM	90.925
24.7433	Sunghir4	Sunghir	200.845	23	134.984	11	66.3366	3	47.7177	2	33992	Sunghir	56.18	40.5	1133177	preLGM	65.8614
15.0434	Sunghir3	Sunghir	186.466	23	102.947	10	27.0868	2	0	0	34093	Sunghir	56.18	40.5	1149730	preLGM	83.5182
26.8259	ZlatyKun	ZlatyKun	167.499	17	99.5944	5	91.5858	4	71.9125	3	45000	pre-40k	49.9162	14.0666	653677	preLGM	67.9049
13.9182	MA1	ANE	159.717	23	64.2379	6	27.6883	2	0	0	24305	ANE	52.9	103.5	805960	preLGM	95.4789
17.7813	Yana_old	ANE	117.516	17	37.8782	3	17.7813	1	0	0	31950	ANE	70.72	135.42	1150093	preLGM	79.6376
20.7973	Sunghir1	Sunghir	107.584	16	31.6755	2	20.7973	1	20.7973	1	32823	Sunghir	56.18	40.5	795499	preLGM	75.9084
16.5935	PA12	PA12	106.174	17	16.5935	1	16.5935	1	0	0	29460	Vestonice	41.65	15.61	695663	preLGM	89.5806
17.4872	BB7-240	BachoKiro_IUP	98.254	12	59.7755	5	31.8892	2	0	0	44690	pre-40k	42.9467	25.4303	700249	preLGM	38.4785
15.1568	CC7-335	BachoKiro_IUP	94.4512	14	36.2485	3	15.1568	1	0	0	45120	pre-40k	42.9467	25.4303	635624	preLGM	58.2027
10.3497	ORM001	ORM	94.3765	14	37.4406	4	0	0	0	0	30815	Fournol	48.24	2.65	392874	preLGM	56.9359
15.121	UstIshim	UstIshim	90.8282	12	47.2886	4	29.5869	2	0	0	45020	pre-40k	57.7	71.1	1062044	preLGM	43.5396
28.625	BK-1653	BK-1653	65.8194	9	28.625	1	28.625	1	28.625	1	34950	BK-1653	42.9467	25.4303	941459	preLGM	37.1944
14.0877	Yana_old2	ANE	52.8438	7	22.9539	2	14.0877	1	0	0	31950	ANE	70.72	135.42	1147981	preLGM	29.8899
13.4772	Kostenki14	Kostenki14	48.3361	7	22.5649	2	13.4772	1	0	0	37470	Kostenki14	51.23	39.3	1068326	preLGM	25.7712
11.2013	PM1	Muierii1	40.4695	6	19.8921	2	0	0	0	0	34032.5	Muierii1	45.11	23.46	1147320	preLGM	20.5774
29.3911	Villabruna	Italy_Villabruna	256.635	27	176.868	12	109.229	5	74.8433	3	3980	Epigravettian_1	46.15	12.21	883779	Epi_Mag	79.7662
19.4085	RIP001	RIP	193.383	29	64.0088	5	46.1274	3	0	0	16743	Epigravettian_1	45.54	11.01	519960	Epi_Mag	129.374
23.4817	PRD001	PRD	108.998	14	43.2895	2	43.2895	2	23.4817	1	12993.5	Epigravettian_1	46.25	12.89	234477	Epi_Mag	65.7082
12.4278	AC16	AC16	188.581	29	59.8732	6	12.4278	1	0	0	12774.5	Epigravettian_2	44.16	8.33	871260	Epi_Mag	128.708
11.8441	R11	Italy_Continenza	151.297	25	52.2907	5	0	0	0	0	11908	Epigravettian_2	41.96	13.54	737858	Epi_Mag	99.0064
37.2983	R7	Italy_Continenza	328.478	30	248.097	16	176.011	8	89.2049	3	10682	Epigravettian_2	41.96	13.54	1104146	Epi_Mag	80.3814
9.9856	R15	Italy_Continenza	51.6884	8	19.0248	2	0	0	0	0	9125	Epigravettian_2	41.96	13.54	1101458	Epi_Mag	32.6636
19.5834	OrienteC	Italy_OrienteC	432.429	68	139.003	12	59.2543	4	0	0	14000	Epigravettian_3	37.93	13.54	288223	Epi_Mag	293.427
27.9183	STO001	STO	428.856	58	205.861	17	113.661	7	27.9183	1	13462	Epigravettian_3	37.85	14.69	651908	Epi_Mag	222.994
25.5321	UZZ5054	Uzzo_EM	382.102	59	123.569	12	25.5321	1	25.5321	1	10660	Epigravettian_3	38.11	12.7867	777724	Epi_Mag	258.533
37.9293	ElMiron	Spain_ElMiron	332.987	30	259.795	17	165.995	8	109.146	4	18720	Magdalenian	43.26	-3.45	626974	Epi_Mag	73.1918
7.4121	GoyetQ2	GoyetQ2	99.9091	20	0	0	0	0	0	0	15006	Magdalenian	50.45	5.01	379768	Epi_Mag	99.9091
12.1435	Spiginas4	Lithuania_Spiginas	54.947	8	21.7176	2	12.1435	1	0	0	8285	Baltic_Meso	55.76	22.43	670349	Baltic	33.2294
19.4706	I4596	Latvia_Zvejnieki	55.7794	5	47.0888	3	35.5877	2	0	0	7976	Baltic_Meso	56.28	25.13	809475	Baltic	8.6906
17.235	I4432	Latvia_Zvejnieki	56.8149	5	52.8114	4	34.277	2	0	0	7948	Baltic_Meso	56.28	25.13	731451	Baltic	4.0035
0	I4551	Latvia_Zvejnieki	0	0	0	0	0	0	0	0	7671	Baltic_Meso	56.28	25.13	694355	Baltic	0
8.6651	I4439	Latvia_Zvejnieki	58.8122	8	41.7893	5	0	0	0	0	7648	Baltic_Meso	56.28	25.13	743153	Baltic	17.0229
15.9575	I4595	Latvia_Zvejnieki	38.1812	5	15.9575	1	15.9575	1	0	0	7637	Baltic_Meso	56.28	25.13	784407	Baltic	22.2237
18.0807	I4437	Latvia_Zvejnieki_MN	82.0878	11	28.8427	2	18.0807	1	0	0	6148	Baltic_MN	56.28	25.13	731771	Baltic	53.2451
10.5799	I4436	Latvia_Zvejnieki_MN	25.9574	3	19.5735	2	0	0	0	0	6105	Baltic_MN	56.28	25.13	736319	Baltic	6.3839
28.5441	I4627	Latvia_Zvejnieki_MN	223.302	24	157.855	12	97.7358	6	28.5441	1	6064	Baltic_MN	56.28	25.13	672578	Baltic	65.447
25.1734	I4435	Latvia_Zvejnieki_MN	135.323	12	110.195	8	61.2057	3	45.4061	2	6003	Baltic_MN	56.28	25.13	728652	Baltic	25.1284
15.0135	Latvia_MN2	Latvia_Zvejnieki_MN	42.8661	5	27.2608	2	27.2608	2	0	0	5965	Baltic_MN	56.28	25.13	758597	Baltic	15.6053
11.3361	I4554	Latvia_Zvejnieki_MN	11.3361	1	11.3361	1	0	0	0	0	5949	Baltic_MN	56.28	25.13	722181	Baltic	0
17.551	Donkalnis7	Lithuania_Narva	58.9264	7	39.4649	3	31.2957	2	0	0	7150	Baltic_Narva	55.78	22.44	459956	Baltic	19.4615
13.0025	Veibri4	Estonia_Narva	65.8291	10	13.0025	1	13.0025	1	0	0	6760	Baltic_Narva	58.34	26.79	544626	Baltic	52.8266
13.0477	Donkalnis6	Lithuania_Narva	70.2123	10	32.2949	3	13.0477	1	0	0	6575	Baltic_Narva	55.78	22.44	945184	Baltic	37.9174
25.2699	Spiginas1	Lithuania_Narva	116.503	10	95.1039	6	74.4034	4	25.2699	1	6290	Baltic_Narva	55.76	22.43	974436	Baltic	21.399
22.0547	Kretuonas4	Lithuania_Narva	129.533	18	51.6511	3	51.6511	3	22.0547	1	6150	Baltic_Narva	55.25	26.11	1005528	Baltic	77.882
11.9557	Kretuonas2	Lithuania_Narva	110.414	18	11.9557	1	0	0	0	0	6150	Baltic_Narva	55.25	26.11	640295	Baltic	98.4588
13.022	PES001	PES	38.7084	5	29.8964	3	13.022	1	0	0	12655	EHG_10000BP	61.23	38.91	1091006	Sidelkino	8.81199
13.4622	Sidelkino	Russia_Sidelkino	52.2615	7	22.9601	2	13.4622	1	0	0	11259	EHG_10000BP	54.53	51.11	967380	Sidelkino	29.3014
5.6154	MN2002	MNN_1	19.0718	4	0	0	0	0	0	0	10662.5	EHG_10000BP	59.7	39.5	649905	Sidelkino	19.0718
32.6617	MNN006	MNN_1	76.9287	8	47.6793	2	47.6793	2	32.6617	1	10661.5	EHG_10000BP	59.7	39.5	703625	Sidelkino	29.2494
16.9655	MN2003	MNN_1	39.2822	5	16.9655	1	16.9655	1	0	0	10533.5	EHG_10000BP	59.7	39.5	610443	Sidelkino	22.3167
13.1423	MNN005	MNN_1	69.1987	11	32.8371	3	13.1423	1	0	0	10513.5	EHG_10000BP	59.7	39.5	1025604	Sidelkino	36.3616
9.6004	JAZ001	JAZ	36.3186	6	9.6004	1	0	0	0	0	7241	EHG	57.12	38.15	713123	Sidelkino	26.7182
7.9232	KVH002	KVH	38.5745	7	0	0	0	0	0	0	8300.5	EHG	60.46	38.64	447998	Sidelkino	38.5745
0	I4630	Latvia_Zvejnieki	0	0	0	0	0	0	0	0	9222	Baltic_Meso	56.28	25.13	749693	Sidelkino	0
9.8007	I4550	Latvia_Zvejnieki	54.7209	9	17.9144	2	0	0	0	0	8489	Baltic_Meso	56.28	25.13	761253	Sidelkino	36.8065
43.9933	I4632	Latvia_Zvejnieki	138.055	12	108.618	6	82.4815	3	64.5152	2	8308	Baltic_Meso	56.28	25.13	785409	Sidelkino	29.4365
13.5782	I4434	Latvia_Zvejnieki	48.694	5	43.6394	4	13.5782	1	0	0	7446	Baltic_Meso	56.28	25.13	730295	Sidelkino	5.0546
11.2312	I4553	Latvia_Zvejnieki	44.3999	7	19.6823	2	0	0	0	0	7379	Baltic_Meso	56.28	25.13	504509	Sidelkino	24.7176
18.3428	I4552	Latvia_Zvejnieki	44.6378	4	33.4348	2	33.4348	2	0	0	7377	Baltic_Meso	56.28	25.13	744491	Sidelkino	11.203
11.0671	I4438	Latvia_Zvejnieki	49.5237	8	21.3299	2	0	0	0	0	7291	Baltic_Meso	56.28	25.13	742445	Sidelkino	28.1938
13.8798	I4440	Latvia_Zvejnieki	62.0249	6	62.0249	6	25.9491	2	0	0	7080	Baltic_Meso	56.28	25.13	721059	Sidelkino	0
8.4018	I4628	Latvia_Zvejnieki	54.9711	9	8.4018	1	0	0	0	0	7027	Baltic_Meso	56.28	25.13	702831	Sidelkino	46.5693
6.3617	I4441	Latvia_Zvejnieki	19.9009	4	0	0	0	0	0	0	6725	Baltic_Meso	56.28	25.13	732164	Sidelkino	19.9009
20.7137	MNN001.002	MNN_2	41.617	5	20.7137	1	20.7137	1	20.7137	1	8527	EHG	59.7	39.5	883806	Sidelkino	20.9033
5.8747	UOO033	Russia_Karelia	14.6846	3	0	0	0	0	0	0	8295	EHG	61.94	35.26	851449	Sidelkino	14.6846
15.6272	I0061	Russia_Karelia	50.0739	7	24.0928	2	15.6272	1	0	0	8280	EHG	61.65	35.65	1003545	Sidelkino	25.9811
13.2403	UOO047	Russia_Karelia	61.0575	7	51.1539	5	13.2403	1	0	0	8202	EHG	61.94	35.26	462681	Sidelkino	9.90359
15.1194	UOO012	Russia_Karelia	65.2497	11	15.1194	1	15.1194	1	0	0	8200	EHG	61.94	35.26	481111	Sidelkino	50.1303
10.8848	UOO023	Russia_Karelia	59.1673	9	20.0065	2	0	0	0	0	8200	EHG	61.94	35.26	726112	Sidelkino	39.1608
8.6648	UOO037	Russia_Karelia	45.1589	8	17.1448	2	0	0	0	0	8200	EHG	61.94	35.26	732019	Sidelkino	28.0141
5.2032	UOO052	Russia_Karelia	13.9944	3	0	0	0	0	0	0	8200	EHG	61.94	35.26	447882	Sidelkino	13.9944
6.0424	UzOO77	Russia_Karelia	37.7168	8	0	0	0	0	0	0	7200	EHG	61.65	35.65	532960	Sidelkino	37.7168
7.9868	I0124	Russia_Samara	16.9353	3	0	0	0	0	0	0	7549	EHG	53.68	50.68	471173	Sidelkino	16.9353
7.5915	Hum1	Norway_Hummervikholmen	33.295	6	0	0	0	0	0	0	9364	SHG	58.07	7.74	405317	Sidelkino	33.295
8.19349	Hum2	Norway_Hummervikholmen	26.8577	5	8.19349	1	0	0	0	0	9364	SHG	58.07	7.74	1089642	Sidelkino	18.6642
4.8652	SF9	Sweden_Gotland	4.8652	1	0	0	0	0	0	0	9144	SHG	57.29	17.97	812693	Sidelkino	4.8652
6.4456	SF12	Sweden_Gotland	38.822	8	0	0	0	0	0	0	8895	SHG	57.29	17.97	1114435	Sidelkino	38.822
8.61859	I0015	Sweden_Motala	30.7884	5	8.61859	1	0	0	0	0	7747	SHG	58.54	15.05	590754	Sidelkino	22.1698
14.4759	I0014	Sweden_Motala	72.3665	11	23.7228	2	14.4759	1	0	0	7703	SHG	58.54	15.05	738913	Sidelkino	48.6437
4.37699	I0017	Sweden_Motala	4.37699	1	0	0	0	0	0	0	7626	SHG	58.54	15.05	902326	Sidelkino	4.37699
0	I0012	Sweden_Motala	0	0	0	0	0	0	0	0	7595	SHG	58.54	15.05	773339	Sidelkino	0
17.42	I0011	Sweden_Motala	42.9215	5	26.6984	2	17.42	1	0	0	7569	SHG	58.54	15.05	621002	Sidelkino	16.2231
16.5835	Steigen	Norway_Steigen	97.4754	13	43.8022	4	16.5835	1	0	0	5857	SHG	67.81	14.68	843558	Sidelkino	53.6732
12.8437	I1819	Ukraine_Vasilevka	47.7123	6	30.4599	3	12.8437	1	0	0	10643	Ukraine_Meso	47.43	35.28	796193	Ukraine	17.2524
5.2641	VSL002	Ukraine_Vasilevka	21.7517	5	0	0	0	0	0	0	10322	Ukraine_Meso	48.22	35.4	471274	Ukraine	21.7517
11.1019	I1763	Ukraine_Vasilevka	71.7074	10	30.6835	3	0	0	0	0	10074	Ukraine_Meso	47.43	35.28	813901	Ukraine	41.0239
7.7062	I1734	Ukraine_N	15.2757	2	0	0	0	0	0	0	9202	Ukraine_N	47.43	35.28	748908	Ukraine	15.2757
5.6284	I5876	Ukraine_Dereivka1	14.2146	3	0	0	0	0	0	0	8822	Ukraine_N	48.91	33.76	467185	Ukraine	14.2146
7.9837	I1736	Ukraine_N	23.1434	4	0	0	0	0	0	0	8109	Ukraine_N	47.43	35.28	649790	Ukraine	23.1434
4.9634	IGR001	IGR001	4.9634	1	0	0	0	0	0	0	7584	Ukraine_N	48.48	35.19	645875	Ukraine	4.9634
13.7931	I3715	Ukraine_N	18.257	2	13.7931	1	13.7931	1	0	0	7529	Ukraine_N	47.95	35.39	459104	Ukraine	4.4639
7.6376	VO1003	VO	7.6376	1	0	0	0	0	0	0	7486.5	Ukraine_N	48.14	35.08	540928	Ukraine	7.6376
5.6054	VO2001	VO	10.8078	2	0	0	0	0	0	0	7510	Ukraine_N	48.14	35.08	633060	Ukraine	10.8078
4.152	I4114	Ukraine_N	4.152	1	0	0	0	0	0	0	7351	Ukraine_N	48.91	33.76	581190	Ukraine	4.152
4.7472	I1738	Ukraine_N	13.1905	3	0	0	0	0	0	0	7350	Ukraine_N	48.13	35.08	711174	Ukraine	13.1905
23.9888	I3717	Ukraine_N	23.9888	1	23.9888	1	23.9888	1	23.9888	1	7289	Ukraine_N	48.91	33.76	488383	Ukraine	0
4.5177	I1732	Ukraine_N	4.5177	1	0	0	0	0	0	0	7239	Ukraine_N	48.13	35.08	732709	Ukraine	4.5177
11.7543	I3718	Ukraine_N	18.7407	2	11.7543	1	0	0	0	0	7230	Ukraine_N	48.91	33.76	488496	Ukraine	6.9864
20.8496	I5875	Ukraine_N	47.6792	5	31.2518	2	20.8496	1	20.8496	1	7126	Ukraine_N	48.91	33.76	436254	Ukraine	16.4274
48.1541	I4111	Ukraine_N	107.178	9	75.3873	3	63.6165	2	48.1541	1	6585	Ukraine_N	48.91	33.76	727859	Ukraine	31.7906
12.9099	I6767	Britain_Mesolithic	62.1148	11	12.9099	1	12.9099	1	0	0	10300	British Isles Mesolithic	51.2817	-2.76575	1113808	Oberkassel	49.2049
25.1184	DOG007	Doggerland	110.106	15	47.2275	3	25.1184	1	25.1184	1	9338.5	British Isles Mesolithic	54.7214	2.7678	457869	Oberkassel	62.8784
8.532	KGH6	Ireland_Mesolithic	66.3992	12	8.532	1	0	0	0	0	6650.5	British Isles Mesolithic	52.6	-8.33	817873	Oberkassel	57.8672
9.1882	SRA62	Ireland_Mesolithic	100.352	18	9.1882	1	0	0	0	0	6044.5	British Isles Mesolithic	54.3	-8.34	1150007	Oberkassel	91.164
5.0685	I10899	Spain_CarihuelaCave	13.9671	3	0	0	0	0	0	0	9000	Iberia_Mesolithic	37.4488	-3.4297	468694	Oberkassel	13.9671
12.3334	Chan	Spain_Chan	74.7915	11	32.1184	3	12.3334	1	0	0	9131	Iberia_Mesolithic	42.7251	-7.03666	1036284	Oberkassel	42.6731
4.0912	I0585	Spain_LaBrana	4.0912	1	0	0	0	0	0	0	7815	Iberia_Mesolithic	42.911	-5.3778	976082	Oberkassel	4.0912
8.4069	Canes	Spain_Canes	64.0258	12	8.4069	1	0	0	0	0	7115	Iberia_Mesolithic	43.3173	-4.8479	804993	Oberkassel	55.6189
13.1615	I5235	Serbia_IronGates	49.553	8	21.3854	2	13.1615	1	0	0	10835	Iron Gates	44.5959	22.0106	838984	Iron Gates	28.1676
5.7415	I5240	Serbia_IronGates	20.447	4	0	0	0	0	0	0	10805	Iron Gates	44.5959	22.0106	826331	Iron Gates	20.447
19.7492	I5244	Serbia_IronGates	82.506	8	48.6004	3	38.4404	2	0	0	10785	Iron Gates	44.5959	22.0106	809448	Iron Gates	33.9056
6.3588	I5242	Serbia_IronGates	50.9694	10	0	0	0	0	0	0	10530	Iron Gates	44.5959	22.0106	836819	Iron Gates	50.9694
6.03301	I5239	Serbia_IronGates	21.525	4	0	0	0	0	0	0	10333	Iron Gates	44.5959	22.0106	809534	Iron Gates	21.525
40.2225	I5236	Serbia_IronGates	110.208	8	99.5616	6	71.2655	3	40.2225	1	10008	Iron Gates	44.5959	22.0106	840166	Iron Gates	10.6464
10.7874	I5238	Serbia_IronGates	41.1489	7	10.7874	1	0	0	0	0	9993	Iron Gates	44.5959	22.0106	823422	Iron Gates	30.3615
18.2988	I5407	Serbia_IronGates	78.8901	8	57.779	5	18.2988	1	0	0	9800	Iron Gates	44.5529	22.0276	850240	Iron Gates	21.1111
9.82829	I5237	Serbia_IronGates	43.5777	8	9.82829	1	0	0	0	0	9800	Iron Gates	44.5959	22.0106	842513	Iron Gates	33.7494
7.0813	I5409	Serbia_IronGates	21.5161	4	0	0	0	0	0	0	9800	Iron Gates	44.5959	22.0106	583173	Iron Gates	21.5161
7.75931	I5234	Serbia_IronGates	13.2643	2	0	0	0	0	0	0	9800	Iron Gates	44.5959	22.0106	708929	Iron Gates	13.2643
5.0354	I5436	Romania_IronGates	14.0924	3	0	0	0	0	0	0	9025	Iron Gates	44.6297	22.6126	729326	Iron Gates	14.0924
9.5567	I5401	Serbia_IronGates	23.9609	4	9.5567	1	0	0	0	0	8838	Iron Gates	44.6403	22.3033	469437	Iron Gates	14.4042
22.0359	M96	Romania_IronGates	32.7721	3	22.0359	1	22.0359	1	22.0359	1	8825	Iron Gates	44.6297	22.6126	1075084	Iron Gates	10.7362
11.385	M95	Romania_IronGates	23.5948	3	11.385	1	0	0	0	0	8814	Iron Gates	44.6297	22.6126	733033	Iron Gates	12.2098
45.6959	I4916	Serbia_IronGates	203.396	17	163.865	9	134.511	6	92.1375	3	8763	Iron Gates	44.6403	22.3033	804977	Iron Gates	39.5309
6.8975	I4870	Serbia_IronGates	6.8975	1	0	0	0	0	0	0	8740	Iron Gates	44.5337	22.0503	619637	Iron Gates	6.8975
5.593	OC	Romania_IronGates	13.9198	3	0	0	0	0	0	0	8704	Iron Gates	44.517	22.722	950046	Iron Gates	13.9198
28.4059	I4582	Romania_IronGates	40.7307	3	28.4059	1	28.4059	1	28.4059	1	8697	Iron Gates	44.517	22.722	930179	Iron Gates	12.3248
6.0937	I5411	Romania_IronGates	15.1352	3	0	0	0	0	0	0	8600	Iron Gates	44.6297	22.6126	716414	Iron Gates	15.1352
7.6115	I4874	Serbia_IronGates	20.8292	4	0	0	0	0	0	0	8506	Iron Gates	44.5337	22.0503	801500	Iron Gates	20.8292
4.2219	I4877	Serbia_IronGates	4.2219	1	0	0	0	0	0	0	8505	Iron Gates	44.5337	22.0503	817983	Iron Gates	4.2219
8.2638	I4875	Serbia_IronGates	12.9053	2	8.2638	1	0	0	0	0	8458	Iron Gates	44.5337	22.0503	815491	Iron Gates	4.6415
7.4217	I4876	Serbia_IronGates	7.4217	1	0	0	0	0	0	0	8455	Iron Gates	44.5337	22.0503	802136	Iron Gates	7.4217
10.1616	I5772	Serbia_IronGates	66.8498	11	19.9424	2	0	0	0	0	8450	Iron Gates	44.5337	22.0503	446446	Iron Gates	46.9074
8.0373	I4871	Serbia_IronGates	16.5726	3	8.0373	1	0	0	0	0	8450	Iron Gates	44.5337	22.0503	507099	Iron Gates	8.5353
18.2778	I4881	Serbia_IronGates	33.4994	3	29.3553	2	18.2778	1	0	0	8363	Iron Gates	44.5337	22.0503	841755	Iron Gates	4.14411
4.1448	I5402	Serbia_IronGates	4.1448	1	0	0	0	0	0	0	8156	Iron Gates	44.6403	22.3033	823880	Iron Gates	4.1448
9.2453	I4914	Serbia_IronGates	28.1149	4	18.1769	2	0	0	0	0	8123	Iron Gates	44.6403	22.3033	824939	Iron Gates	9.938
4.3949	I4915	Serbia_IronGates	4.3949	1	0	0	0	0	0	0	8115	Iron Gates	44.6403	22.3033	834938	Iron Gates	4.3949
4.5622	I4917	Serbia_IronGates	4.5622	1	0	0	0	0	0	0	8058	Iron Gates	44.6403	22.3033	789618	Iron Gates	4.5622
0	I5233	Serbia_IronGates	0	0	0	0	0	0	0	0	8001	Iron Gates	44.5959	22.0106	824280	Iron Gates	0
8.3382	I4873	Serbia_IronGates	24.252	4	8.3382	1	0	0	0	0	7872	Iron Gates	44.5337	22.0503	803852	Iron Gates	15.9138
0	I4880	Serbia_IronGates	0	0	0	0	0	0	0	0	7813	Iron Gates	44.5337	22.0503	827165	Iron Gates	0
6.6244	I4878	Serbia_IronGates	15.4704	3	0	0	0	0	0	0	7803	Iron Gates	44.5337	22.0503	816301	Iron Gates	15.4704
32.4165	I2534	Romania_MaguraBuduiasca	112.714	10	75.366	4	65.6868	3	32.4165	1	7670	Iron Gates	44.0272	25.3925	418429	Iron Gates	37.3484
5.8609	UZZ082	Sicily_LM	14.4511	3	0	0	0	0	0	0	8505	Sicily_8000BP	38.11	12.7867	724610	Oberkassel	14.4511
31.7225	UZZ069	Sicily_LM	99.7603	7	79.7869	4	70.9164	3	52.1289	2	8460	Sicily_8000BP	38.11	12.7867	658972	Oberkassel	19.9734
18.5565	UZZ080	Sicily_LM	79.1213	8	66.7715	6	30.7274	2	0	0	8425	Sicily_8000BP	38.11	12.7867	927858	Oberkassel	12.3498
7.68499	UZZ079	Sicily_LM	24.8253	4	0	0	0	0	0	0	8425	Sicily_8000BP	38.11	12.7867	904495	Oberkassel	24.8253
15.5389	UZZ4446	Sicily_LM	75.3338	8	52.8229	4	30.5448	2	0	0	8325	Sicily_8000BP	38.11	12.7867	495882	Oberkassel	22.5109
11.8551	UZZ071	Sicily_LM	134.294	21	33.1484	3	0	0	0	0	7940	Sicily_8000BP	38.11	12.7867	536349	Oberkassel	101.145
18.7423	UZZ088	Sicily_LM	68.2856	9	36.6472	3	18.7423	1	0	0	7870	Sicily_8000BP	38.11	12.7867	540985	Oberkassel	31.6384
20.7613	OKL001	Oberkassel	208.32	27	90.4879	6	59.3005	3	20.7613	1	13945	WHG_10000BP	50.7119	7.1675	729891	Oberkassel	117.832
7.8592	Bichon	Bichon	58.4813	11	0	0	0	0	0	0	13665	WHG_10000BP	47.1	6.87	1176132	Oberkassel	58.4813
27.0135	OKL002	Oberkassel	182.608	24	88.7001	6	61.3637	3	27.0135	1	13457.5	WHG_10000BP	50.7119	7.1675	680469	Oberkassel	93.9076
18.063	AAT001	AAT	103.882	11	72.6317	5	60.6967	4	0	0	10841.5	WHG_10000BP	50.4744	4.8729	1059472	Oberkassel	31.2502
8.5305	MPR001	MPR	66.5718	12	8.5305	1	0	0	0	0	10466.5	WHG_10000BP	50.4744	4.8729	1038512	Oberkassel	58.0413
18.3496	N22	Poland_Konary_N22	85.9192	11	47.993	4	30.6971	2	0	0	6291	WHG_6000BP	52.61	18.9	972044	Oberkassel	37.9262
8.3162	I1565	Germany_Blatterhohle	39.2515	6	8.3162	1	0	0	0	0	5735	WHG_6000BP	51.3583	7.55111	864619	Oberkassel	30.9353
14.4423	OST003	Ostorf	98.272	12	64.8278	6	14.4423	1	0	0	5183	WHG_6000BP	53.6171	11.4259	705687	Oberkassel	33.4442
5.5657	Syltholm	Denmark_Syltholm	28.309	6	0	0	0	0	0	0	5759	WHG_6000BP	54.6631	11.3568	593102	Oberkassel	28.309
17.4448	DRI001	DRI	75.163	10	26.128	2	17.4448	1	0	0	7180	WHG_7000BP	54.2905	13.1605	813323	Oberkassel	49.035
10.4416	GFW005	GFW_2	47.0084	7	10.4416	1	0	0	0	0	7053	WHG_7000BP	53.1289	13.7954	816674	Oberkassel	36.5668
7.35379	CRW001	CRW	25.7976	5	0	0	0	0	0	0	6705.5	WHG_7000BP	53.0123	14.2188	593686	Oberkassel	25.7976
23.5789	BDB001	Germany_BadDurrenberg	92.7071	10	65.945	5	37.1984	2	23.5789	1	8566	WHG_8000BP	51.3	12.07	834880	Oberkassel	26.7621
4.6824	GFW004	GFW_1	4.6824	1	0	0	0	0	0	0	8325	WHG_8000BP	53.1289	13.7954	685384	Oberkassel	4.6824
13.4028	Loschbour	Loschbour	99.629	13	63.7157	6	25.6451	2	0	0	8050	WHG_8000BP	49.81	6.4	1062011	Oberkassel	35.9133
8.6245	GFW002.003	GFW_1	29.0036	5	8.6245	1	0	0	0	0	7877	WHG_8000BP	53.1289	13.7954	931997	Oberkassel	20.3791
17.5856	GFW001	GFW_1	113.537	13	75.8984	6	45.0581	3	0	0	7800	WHG_8000BP	53.1289	13.7954	542964	Oberkassel	37.6391
6.81231	I1507	Hungary_Koros	20.4408	4	0	0	0	0	0	0	7660	WHG_8000BP	47.5592	20.7212	800965	Oberkassel	20.4408
25.002	AMI001	AMI001	186.292	18	140.264	9	103.485	5	71.8694	3	6748	Iberia_Mesolithic	43.39	-4.9	843959	Oberkassel	46.0279
15.2827	OST002	OST002	86.9171	12	44.1781	4	15.2827	1	0	0	5244.5	WHG_6000BP	53.62	11.43	831724	Oberkassel	42.739
14.7436	GFW007	GFW_1	48.0744	7	23.464	2	14.7436	1	0	0	8046.5	WHG_8000BP	53.13	13.8	543575	Oberkassel	24.6104
10.483	CRN001	CRN	15.0473	2	10.483	1	0	0	0	0	7884	Iberia_Mesolithic	38.68	-0.93	737132	Oberkassel	4.5643
11.0032	CRN002	CRN	63.8464	11	20.734	2	0	0	0	0	7939.5	Iberia_Mesolithic	38.68	-0.93	791255	Oberkassel	43.1124
10.5838	DOB001	DOB	46.0968	6	29.7339	3	0	0	0	0	9437.5	WHG_10000BP	53.13	13.8	908518	Oberkassel	16.3629

## Sheet: C.qpAdm_Magdalenian
			Modelling: FRL+AC16				Modelling: GoyetQ2+AC16
Pop	Group	Age	p-value	FRL	AC16	SD	p-value	AC16	GoyetQ2	SD
Belgium_GoyetQ2	Magdalenian	15090.5	0.012798	0.835	0.165	0.035	NA	NA	NA	NA
Brillenhohle.pmd	Magdalenian	14780	0.048924	0.734	0.266	0.146	NA	NA	NA	NA
Burkhardtshohle.pmd	Magdalenian	14615	0.772516	0.764	0.236	0.108	NA	NA	NA	NA
HohleFels	Magdalenian	14900	0.425706	0.729	0.271	0.045	NA	NA	NA	NA
LMA	Magdalenian	18073	0.657662	0.684	0.316	0.076	NA	NA	NA	NA
MAZ003	Magdalenian	15550	0.672079	0.802	0.198	0.047	NA	NA	NA	NA
PIN	Magdalenian	14722	0.729596	0.711	0.289	0.115	NA	NA	NA	NA
Rigney1	Magdalenian	15465	0.048928	0.702	0.298	0.087	NA	NA	NA	NA
Spain_ElMiron	Magdalenian	18720	0.653219	0.572	0.428	0.031	NA	NA	NA	NA
AMI	Iberian	7130	0.005331	0.231	0.769	0.036	0.000827	0.552	0.448	0.034
AMI001	Iberian	6748	0.003444	0.234	0.766	0.029	1.10117e-09	0.572	0.428	0.032
CRN	Iberian	7911.5	0.865553	0.413	0.587	0.023	0.429352	0.367	0.633	0.02
Portugal_MoitadoSebastiao	Iberian	8064	0.071288	0.43	0.57	0.04	0.240999	0.267	0.733	0.026
Spain_BalmaGuilanya	Iberian	12465.5	0.533091	0.346	0.654	0.033	0.584753	0.389	0.611	0.028
Spain_Canes.SG	Iberian	7115	0.100017	0.223	0.777	0.029	0.000474	0.57	0.43	0.028
Spain_CarihuelaCave	Iberian	~9000	0.261013	0.519	0.481	0.031	0.205413	0.211	0.789	0.023
Spain_Chan.SG	Iberian	9131	0.62832	0.451	0.549	0.027	0.796787	0.316	0.684	0.022
Spain_CingleMasNou	Iberian	7830	0.280475	0.337	0.663	0.115	0.596167	0.312	0.688	0.061
Spain_LaBrana	Iberian	7815	0.001841	0.326	0.674	0.029	0.001525	0.473	0.527	0.025
AAT	Oberkassel	10841.5	0.348851	0.136	0.864	0.027	0.011493	0.757	0.243	0.027
DOB	Oberkassel	9437.5	0.19772	0.191	0.809	0.026	0.000378	0.713	0.287	0.028
DOG	Oberkassel	9513.71	0.850299	0.127	0.873	0.026	0.009121	0.773	0.227	0.028
England_AvelinesHole.SG	Oberkassel	10477	0.279404	0.155	0.845	0.043	0.006745	0.644	0.356	0.047
England_GoughsCave.SG	Oberkassel	10300	0.821294	0.138	0.862	0.027	0.109848	0.752	0.248	0.029
FRM	Oberkassel	10212	0.731734	0.142	0.858	0.054	0.728367	0.815	0.185	0.06
Germany_BadDurrenberg	Oberkassel	8566	0.133847	0.152	0.848	0.029	0.075917	0.725	0.275	0.029
Ireland_Mesolithic	Oberkassel	6350	0.283825	0.1	0.9	0.025	0.028463	0.782	0.218	0.025
Luxembourg_Loschbour.DG	Oberkassel	8050	0.927106	0.133	0.867	0.024	0.270616	0.747	0.253	0.026
MAF	Oberkassel	8864.5	0.296186	0.122	0.878	0.042	0.772074	0.776	0.224	0.042
MesoFr	Oberkassel	9067	0.986162	0.13	0.87	0.029	0.928158	0.721	0.279	0.028
MPR	Oberkassel	10466.5	0.296113	0.109	0.891	0.027	0.050498	0.777	0.223	0.028
OKL	Oberkassel	13700	0.173099	0.127	0.873	0.025	0.004262	0.755	0.245	0.026
Ranchot88	Oberkassel	10085	0.194745	0.126	0.874	0.041	0.184306	0.761	0.239	0.046
Rochedane	Oberkassel	12960	0.240965	0.077	0.923	0.046	0.515293	0.723	0.277	0.047
Switzerland_Bichon.SG	Oberkassel	13665	0.219163	0.141	0.859	0.026	0.002187	0.759	0.241	0.031
Wales_Ogof	Oberkassel	9588	0.624202	0.114	0.886	0.033	0.078436	0.733	0.267	0.037
WCX	Oberkassel	10459	0.207299	0.155	0.845	0.042	0.732736	0.704	0.296	0.069

## Sheet: D.qpWave_MN_HG
Population	Grouping	Testpop	chisq	p-value
AAT	WHG	OKL	11.93	0.289766
BerryAuBac	WHG	OKL	11	0.357519
Bockstein	WHG	OKL	25.138	0.00509082
BRM	WHG	OKL	172.337	9.1e-32
Croatia_VelaSpila	WHG	OKL	14.495	0.151594
CRW	WHG	OKL	25.803	0.00401431
Denmark_Syltholm	WHG	OKL	18.477	0.0474349
DOG	WHG	OKL	7.865	0.642057
DRI	WHG	OKL	31.341	0.000515315
England_AvelinesHole.SG	WHG	OKL	21.437	0.0182434
England_GoughsCave.SG	WHG	OKL	7.291	0.697708
England_KentsCavern.SG	WHG	OKL	14.032	0.171527
Estonia_CCC	EHG	Karelia	105.535	4.23e-18
Estonia_CCC.SG	EHG	Karelia	36.186	7.82e-05
Estonia_Narva	EHG	Karelia	432.99	8.85e-87
Falkenstein	WHG	OKL	11.771	0.30067
FRM	WHG	OKL	14.045	0.170936
Germany_BadDurrenberg	WHG	OKL	19.301	0.0366003
Germany_Blatterhohle	WHG	OKL	101.746	2.44e-17
Germany_Bottendorf	WHG	OKL	14.332	0.158392
GFW_1	WHG	OKL	18.081	0.0536051
GFW_2	WHG	OKL	29.644	0.000979305
Hungary_Koros	WHG	OKL	51.997	1.14e-07
IGR001	EHG	Karelia	206.5	7.1e-39
Ireland_Mesolithic	WHG	OKL	10.483	0.399172
JAZ	EHG	Karelia	30.442	0.00072509
KRZ	WHG	OKL	27.176	0.0024425
KVH	EHG	Karelia	17.192	0.070215
Latvia_Zvejnieki	EHG	Karelia	1574.81	0
Latvia_Zvejnieki_MN	EHG	Karelia	356.895	1.37e-70
Lithuania_Narva	EHG	Karelia	1414.81	6.28e-298
Lithuania_Spiginas	EHG	Karelia	865.401	1.77e-179
Luxembourg_Loschbour.DG	WHG	OKL	8.797	0.551481
MAF	WHG	OKL	8.141	0.615053
MesoFr	WHG	OKL	9.7	0.46724
MNN_1	EHG	Karelia	50.165	2.49e-07
MNN_2	EHG	Karelia	17.795	0.0585177
MNN_3	EHG	Karelia	50.41	2.24e-07
MPR	WHG	OKL	6.873	0.737422
MUR	EHG	Karelia	64.909	4.22e-10
Norway_Hummervikholmen.SG	EHG	Karelia	158.79	5.76e-29
Norway_Steigen.SG	EHG	Karelia	151.131	2.18e-27
OST001	WHG	OKL	47.248	8.51e-07
OST003	WHG	OKL	55.117	3e-08
Poland_Konary_N22.SG	WHG	OKL	56.521	1.64e-08
Ranchot88	WHG	OKL	8.536	0.576582
Rochedane	WHG	OKL	10.465	0.400682
Romania_IronGates	WHG	OKL	208.588	2.6e-39
Romania_MaguraBuduiasca	WHG	OKL	166.306	1.61e-30
Russia_Popovo	EHG	Karelia	5.4	0.862877
Russia_Samara	EHG	Karelia	12.207	0.271456
Russia_Sidelkino.SG	EHG	Karelia	21.269	0.019292
Scotland_CnocCoig.SG	WHG	OKL	9.655	0.471267
Serbia_IronGates	WHG	OKL	133.712	8.16e-24
Sweden_Gotland.SG	EHG	Karelia	591.247	1.32e-120
Sweden_Motala	EHG	Karelia	772.52	1.66e-159
Switzerland_Bichon.SG	WHG	OKL	11.431	0.324916
Ukraine_Dereivka1	EHG	Karelia	263.592	7.49e-51
Ukraine_N	EHG	Karelia	881.73	5.44e-183
Ukraine_Vasilevka	EHG	Karelia	226.683	4.26e-43
VO	EHG	Karelia	380.567	1.28e-75
Wales_Ogof	WHG	OKL	11.121	0.348158
WCX	WHG	OKL	3.373	0.971244
WOL	WHG	OKL	26.57	0.00304509

## Sheet: E.qpAdm_MN_HG
OKL+Karelia+Anatolia_N
Pop	Model	p-value_full	p_value_nest	p-nested	OKL	Karelia	Anatolia	SD_OKL	SD_Karelia	SD_Anatolia	nSNPs
KAR	Sidelkino	0.632032	0.690174	NA	0	1	0	NA	NA	NA	132154
KVH	Sidelkino	0.243559	0.082853	0.0219288	0	1	0	NA	NA	NA	490887
MNN_2	Sidelkino	0.0461287	0.0781468	NA	0	1	0	NA	NA	NA	883806
Russia_Popovo	Sidelkino	0.751528	0.823735	0.373193	0	1	0	NA	NA	NA	65373
Russia_Samara	Sidelkino	0.367352	0.318089	0.154685	0	1	0	NA	NA	NA	471173
Russia_Sidelkino.SG	Sidelkino	0.00617554	0.0174819	0.629026	0	1	0	NA	NA	NA	967380
AAT	Oberkassel	0.150453	0.265571	NA	1	0	0	NA	NA	NA	1020443
Croatia_VelaSpila	Oberkassel	0.125688	0.148882	0.331	1	0	0	NA	NA	NA	366509
DOB	Oberkassel	0.794158	0.368606	0.0180901	1	0	0	NA	NA	NA	861989
DOG	Oberkassel	0.885417	0.642057	0.0696236	1	0	0	NA	NA	NA	563514
England_AvelinesHole.SG	Oberkassel	0.0504219	0.0162265	0.0191748	1	0	0	NA	NA	NA	153924
England_GoughsCave.SG	Oberkassel	0.425635	0.674631	0.806834	1	0	0	NA	NA	NA	1089198
England_KentsCavern.SG	Oberkassel	0.614889	0.276227	0.0847347	1	0	0	NA	NA	NA	84433
Falkenstein	Oberkassel	0.148563	0.27982	0.817612	1	0	0	NA	NA	NA	67396
FRM	Oberkassel	0.265313	0.171672	0.0521883	1	0	0	NA	NA	NA	103683
Germany_BadDurrenberg	Oberkassel	0.0245023	0.0350315	0.233217	1	0	0	NA	NA	NA	804939
Ireland_Mesolithic	Oberkassel	0.396355	0.370951	NA	1	0	0	NA	NA	NA	1150077
Luxembourg_Loschbour.DG	Oberkassel	0.662954	0.505302	0.129201	1	0	0	NA	NA	NA	1062011
MAF	Oberkassel	0.598067	0.472287	0.106924	1	0	0	NA	NA	NA	227206
MesoFr	Oberkassel	0.370466	0.513209	NA	1	0	0	NA	NA	NA	568452
MPR	Oberkassel	0.475481	0.637227	NA	1	0	0	NA	NA	NA	998499
Ranchot88	Oberkassel	0.686903	0.446507	0.047954	1	0	0	NA	NA	NA	136236
Rochedane	Oberkassel	0.583047	0.355611	0.0533453	1	0	0	NA	NA	NA	140630
Switzerland_Bichon.SG	Oberkassel	0.385262	0.214806	NA	1	0	0	NA	NA	NA	1145593
Wales_Ogof	Oberkassel	0.169055	0.28873	NA	1	0	0	NA	NA	NA	348269
WCX	Oberkassel	0.31027	0.134875	NA	1	0	0	NA	NA	NA	127196
WOL.pmd	Oberkassel	0.751382	0.668876	0.12363	1	0	0	NA	NA	NA	20685
BER	Obertkassel+Sidelkino	0.214692	0.279985	0.687743	0.166	0.834	0	0.047	0.047	NA	87415
CRW	Obertkassel+Sidelkino	0.518865	0.339445	0.0847121	0.892	0.108	0	0.026	0.026	NA	569741
Denmark_Syltholm	Obertkassel+Sidelkino	0.76291	0.686111	0.209018	0.866	0.134	0	0.035	0.035	NA	213074
DRI	Obertkassel+Sidelkino	0.505004	0.544411	0.437839	0.874	0.126	0	0.025	0.025	NA	779688
Germany_Bottendorf	Obertkassel+Sidelkino	0.331667	0.421693	0.835565	0.904	0.096	0	0.042	0.042	NA	83961
GFW_1	Obertkassel+Sidelkino	0.754899	0.73308	0.307097	0.921	0.079	0	0.021	0.021	NA	1012519
GFW_2	Obertkassel+Sidelkino	0.569541	0.663715	0.829472	0.873	0.127	0	0.025	0.025	NA	776968
Italy_Uzzo_LM	Obertkassel+Sidelkino	0.080111	0.0980226	0.407391	0.964	0.036	0	0.018	0.018	NA	1100824
JAZ	Obertkassel+Sidelkino	0.636228	0.527321	0.160487	0.123	0.877	0	0.025	0.025	NA	713123
MNN_1	Obertkassel+Sidelkino	0.00574228	0.00870209	0.493064	0.081	0.919	0	0.015	0.015	NA	1083774
MNN_3	Obertkassel+Sidelkino	0.649072	0.47393	0.105033	0.225	0.775	0	0.034	0.034	NA	144421
Norway_Steigen.SG	Obertkassel+Sidelkino	0.168209	0.149172	0.196008	0.302	0.698	0	0.025	0.025	NA	843558
PES	Obertkassel+Sidelkino	0.239934	0.273639	0.416875	0.084	0.916	0	0.025	0.025	NA	1091006
WOL	Obertkassel+Sidelkino	0.577105	0.391165	0.0893757	0.853	0.147	0	0.033	0.033	NA	211068
BRM	Oberkassel+Anatolia	0.486071	0.457926	0.253994	0.448	0	0.552	0.035	NA	0.035	101596
BRM.pmd	Oberkassel+Anatolia	0.740962	0.736361	0.347881	0.453	0	0.547	0.054	NA	0.054	38242
Germany_Blatterhohle	Oberkassel+Anatolia	0.755587	0.684035	0.561593	0.777	0	0.223	0.021	NA	0.021	846111
Hungary_Koros	Oberkassel+Anatolia	0.215177	0.70969	0.257877	0.872	0	0.128	0.02	NA	0.02	841437
OST001	Oberkassel+Anatolia	0.807489	0.834681	0.490094	0.775	0	0.225	0.033	NA	0.033	152739
Estonia_CCC	Obertkassel+Sidelkino+Anatolia	0.152095	NA	NA	0.239	0.671	0.09	0.025	0.038	0.03	279735
Estonia_CCC.SG	Obertkassel+Sidelkino+Anatolia	0.041745	NA	NA	0.148	0.788	0.064	0.035	0.052	0.041	155954
Estonia_Narva	Obertkassel+Sidelkino+Anatolia	0.433105	NA	NA	0.496	0.413	0.091	0.023	0.034	0.028	599787
IGR001	Obertkassel+Sidelkino+Anatolia	0.407147	NA	NA	0.35	0.507	0.144	0.026	0.038	0.028	645875
Latvia_Zvejnieki	Obertkassel+Sidelkino+Anatolia	0.281304	NA	NA	0.652	0.311	0.038	0.014	0.019	0.015	1069414
Latvia_Zvejnieki_MN	Obertkassel+Sidelkino+Anatolia	0.461913	NA	NA	0.284	0.67	0.046	0.014	0.02	0.015	1096136
Lithuania_Narva	Obertkassel+Sidelkino+Anatolia	0.118196	NA	NA	0.734	0.199	0.067	0.018	0.024	0.018	1085508
Lithuania_Spiginas	Obertkassel+Sidelkino+Anatolia	0.498828	NA	NA	0.821	0.099	0.08	0.026	0.035	0.029	670349
MUR	Obertkassel+Sidelkino+Anatolia	0.0192143	NA	NA	0.1	0.857	0.043	0.015	0.025	0.019	787438
Norway_Hummervikholmen.SG	Obertkassel+Sidelkino+Anatolia	0.114171	NA	NA	0.279	0.675	0.046	0.022	0.031	0.024	1108465
OST002	Obertkassel+Sidelkino+Anatolia	0.393214	NA	NA	0.716	0.081	0.203	0.026	0.033	0.031	790441
OST003	Obertkassel+Sidelkino+Anatolia	0.283281	NA	NA	0.811	0.115	0.073	0.026	0.034	0.03	678493
Poland_Konary_N22.SG	Obertkassel+Sidelkino+Anatolia	0.727205	NA	NA	0.786	0.148	0.066	0.028	0.035	0.028	971491
Romania_IronGates	Obertkassel+Sidelkino+Anatolia	0.00539126	NA	NA	0.699	0.224	0.077	0.017	0.023	0.019	1147836
Romania_MaguraBuduiasca	Obertkassel+Sidelkino+Anatolia	0.0888088	NA	NA	0.583	0.299	0.117	0.029	0.038	0.034	418143
Serbia_IronGates	Obertkassel+Sidelkino+Anatolia	0.134267	NA	NA	0.782	0.138	0.081	0.016	0.021	0.018	1139278
Sweden_Gotland.SG	Obertkassel+Sidelkino+Anatolia	0.589741	NA	NA	0.474	0.464	0.063	0.019	0.025	0.02	1145327
Sweden_Motala	Obertkassel+Sidelkino+Anatolia	0.563411	NA	NA	0.484	0.463	0.053	0.016	0.022	0.018	1041164
Ukraine_Dereivka1	Obertkassel+Sidelkino+Anatolia	0.355586	NA	NA	0.379	0.493	0.127	0.024	0.034	0.025	509463
Ukraine_N	Obertkassel+Sidelkino+Anatolia	0.000200064	NA	NA	0.392	0.486	0.122	0.012	0.017	0.014	1028852
Ukraine_Vasilevka	Obertkassel+Sidelkino+Anatolia	0.013355	NA	NA	0.226	0.682	0.092	0.016	0.023	0.018	996438
VO	Obertkassel+Sidelkino+Anatolia	0.021494	NA	NA	0.36	0.511	0.129	0.019	0.028	0.02	806758
OKL+Karelia
Pop	p-value	OKL	Karelia	SD_OKL	SD_Karelia	nSNPs
BER	0.275939	0.166	0.834	0.047	0.047	87415
CRW	0.382074	0.892	0.108	0.026	0.026	569741
Denmark_Syltholm	0.686207	0.866	0.134	0.035	0.035	213074
DRI	0.600941	0.874	0.126	0.025	0.025	779688
Germany_Bottendorf	0.417917	0.904	0.096	0.042	0.042	83961
GFW_1	0.735556	0.923	0.077	0.021	0.021	1012519
GFW_2	0.668387	0.873	0.127	0.025	0.025	776968
Italy_Uzzo_LM	0.0979617	0.964	0.036	0.018	0.018	1100824
JAZ	0.589206	0.123	0.877	0.025	0.025	713123
MNN_1	0.00817679	0.081	0.919	0.015	0.015	1083774
MNN_3	0.471729	0.225	0.775	0.034	0.034	144421
Norway_Steigen.SG	0.169594	0.302	0.698	0.025	0.025	843558
PES	0.313256	0.084	0.916	0.025	0.025	1091006
WOL	0.394204	0.856	0.144	0.033	0.033	211068
OKL+Anatolia_N
Pop	p-value	OKL	Anatolia	SD_OKL	SD_Karelia	nSNPs
BRM	0.473682	0.448	0.552	0.035	0.035	101596
BRM.pmd	0.744904	0.453	0.547	0.054	0.054	38242
Germany_Blatterhohle	0.77106	0.777	0.223	0.021	0.021	846111
Hungary_Koros	0.139007	0.872	0.128	0.02	0.02	841437
OST001	0.860819	0.775	0.225	0.033	0.033	152739
AC16+GoyetQ2+Karelia+Anatolia_N
Pop	Model	p-value_full	p_value_nest	p-nested	AC16	GoyetQ2	Karelia	Anatolia	SD_AC16	SD_GoyetQ2	SD_Karelia	SD_Anatolia	nSNPs
AMI	AC16+GoyetQ2+Karelia	0.00140203	0.00263663	0.698547	0.566	0.329	0.105	0	0.033	0.057	0.04	0	287319
AMI001	AC16+GoyetQ2+Karelia	0.462388	0.0250758	0.000992872	0.559	0.254	0.187	0	0.027	0.039	0.029	0	808862
CRN	AC16+GoyetQ2	0.666537	0.374932	NA	0.367	0.633	0	0	0.033	0.033	0	0	917393
Portugal_MoitadoSebastiao	AC16+GoyetQ2	0.245162	0.171585	NA	0.271	0.773	0	0	0.026	0.043	0	0	174465
Spain_BalmaGuilanya	AC16+GoyetQ2	0.544461	0.546768	0.181414	0.393	0.582	0	0	0.027	0.044	0	0	342939
Spain_Canes.SG	AC16+GoyetQ2+Karelia	0.702714	0.621301	0.208374	0.565	0.287	0.148	0	0.026	0.04	0.031	0	804677
Spain_CarihuelaCave	AC16+GoyetQ2	0.0977965	0.119085	NA	0.211	0.816	0	0	0.023	0.035	0	0	460494
Spain_Chan.SG	AC16+GoyetQ2	0.669225	0.732549	NA	0.318	0.695	0	0	0.022	0.032	0	0	1035761
Spain_LaBrana	AC16+GoyetQ2+Karelia	0.675125	0.321531	0.0364547	0.463	0.426	0.111	0	0.024	0.034	0.026	0	954740
AC16+GoyetQ2+Karelia
Pop	p-value_full	AC16	GoyetQ2	Karelia	SD_AC16	SD_GoyetQ2	SD_Karelia	nSNPs
AMI	0.002704	0.566	0.329	0.105	0.033	0.057	0.04	287319
AMI001	0.026681	0.56	0.253	0.187	0.027	0.039	0.029	808862
Spain_Canes.SG	0.644008	0.564	0.288	0.148	0.026	0.04	0.031	804677
Spain_LaBrana	0.329007	0.463	0.426	0.111	0.024	0.034	0.026	954740
AC16+GoyetQ2
Pop	p-value_full	AC16	GoyetQ2	SD_AC16	SD_GoyetQ2	nSNPs
CRN	0.429352	0.367	0.633	0.033	0.033	917393
Portugal_MoitadoSebastiao	0.240999	0.267	0.733	0.026	0.026	174465
Spain_BalmaGuilanya	0.584753	0.389	0.611	0.028	0.028	342939
Spain_CarihuelaCave	0.205413	0.211	0.789	0.023	0.023	460494
Spain_Chan.SG	0.796787	0.316	0.684	0.022	0.022	1035761
AAT	0.011493	0.757	0.243	0.027	0.027	1020443
DOG	9.3e-05	0.761	0.239	0.028	0.028	563514
England_AvelinesHole.SG	0.006745	0.644	0.356	0.047	0.047	153924
England_GoughsCave.SG	0.109848	0.752	0.248	0.029	0.029	1089198
FRM	0.728367	0.815	0.185	0.06	0.06	103683
Germany_BadDurrenberg	0.075917	0.725	0.275	0.029	0.029	804939
Ireland_Mesolithic	0.028463	0.782	0.218	0.025	0.025	1150077
Luxembourg_Loschbour.DG	0.270616	0.747	0.253	0.026	0.026	1062011
MAF	0.772074	0.776	0.224	0.042	0.042	227206
MesoFr	0.928158	0.721	0.279	0.028	0.028	568452
MPR	0.050498	0.777	0.223	0.028	0.028	998499
OKL	0.004262	0.755	0.245	0.026	0.026	893840
Ranchot88	0.184306	0.761	0.239	0.046	0.046	136236
Rochedane	0.515293	0.723	0.277	0.047	0.047	140630
Switzerland_Bichon.SG	0.002187	0.759	0.241	0.031	0.031	1145593
Wales_Ogof	0.078436	0.733	0.267	0.037	0.037	348269
WCX	0.732736	0.704	0.296	0.069	0.069	127196
OKL+GoyetQ2+Karelia
Pop	p-value_full	OKL	GoyetQ2	Karelia	SD_OKL	SD_GoyetQ2	SD_Karelia	nSNPs
AMI	0.082355	0.774	0.176	0.05	0.047	0.062	0.038	287319
AMI001	0.627948	0.734	0.144	0.122	0.035	0.042	0.029	808862
Spain_Canes.SG	0.95931	0.742	0.154	0.104	0.035	0.045	0.031	804677
Spain_LaBrana	0.93976	0.599	0.328	0.072	0.031	0.036	0.026	954740
OKL+GoyetQ2
Pop	p-value_full	OKL	GoyetQ2	SD_OKL	SD_GoyetQ2	nSNPs
CRN	0.076064	0.46	0.54	0.025	0.025	917393
Portugal_MoitadoSebastiao	0.059008	0.333	0.667	0.034	0.034	174465
Spain_BalmaGuilanya	0.841177	0.513	0.487	0.036	0.036	342939
Spain_CarihuelaCave	0.050637	0.254	0.746	0.028	0.028	460494
Spain_Chan.SG	0.414318	0.399	0.601	0.028	0.028	1035761
OKL+GoyetQ2+Karelia+Anatolia_N
Pop	Model	p-value_full	p_value_nest	p-nested	OKL	GoyetQ2	Karelia	Anatolia	SD_OKL	SD_GoyetQ2	SD_Karelia	SD_Anatolia	nSNPs
AMI	OKL+GoyetQ2+Karelia	0.096654	0.0795168	NA	0.773	0.173	0.054	0	0.047	0.062	0.038	NA	287319
AMI001	OKL+GoyetQ2+Karelia	0.668674	0.604769	0.22834	0.727	0.137	0.1	0	0.047	0.062	0.038	NA	808862
CRN	OKL+GoyetQ2	0.731977	0.0649995	NA	0.477	0.592	0	0	0.025	0.025	NA	NA	917393
Portugal_MoitadoSebastiao	OKL+GoyetQ2	0.310367	0.0525982	NA	0.334	0.666	0	0	0.034	0.034	NA	NA	174465
Spain_BalmaGuilanya	OKL+GoyetQ2	0.840568	0.783795	NA	0.511	0.489	0	0	0.036	0.036	NA	NA	342939
Spain_Canes.SG	OKL+GoyetQ2+Karelia	0.915726	0.950144	0.771667	0.741	0.152	0.107	0	0.035	0.045	0.031	NA	804677
Spain_CarihuelaCave	OKL+GoyetQ2	0.097057	0.0447732	0.0231449	0.254	0.746	0	0	0.028	0.028	NA	NA	460494
Spain_Chan.SG	OKL+GoyetQ2	0.577038	0.36753	NA	0.397	0.603	0	0	0.028	0.028	NA	NA	1035761
Spain_LaBrana	OKL+GoyetQ2+Karelia	0.94648	0.930159	0.358563	0.597	0.329	0.074	0	0.031	0.036	0.026	NA	954740
Villabruna+AG3
Pop	p-value	Villabruna	AG3	SD
Russia_Popovo	0.102468	0.255	0.745	0.054	65373
Russia_Sidelkino.SG	0.0085455	0.299	0.701	0.026	967380
KVH	1.02732e-05	0.309	0.691	0.029	490887
MNN_2	0.00431795	0.31	0.69	0.027	883806
Russia_Samara	2.10898e-06	0.317	0.683	0.033	471173
Russia_Karelia	2.17748e-06	0.319	0.681	0.019	1113260
PES	0.00593336	0.37	0.63	0.028	1091006
MNN_1	0.00584554	0.38	0.62	0.021	1083774
OKL+AG3
Pop	p-value	OKL	AG3	SD	nSNPs
Russia_Popovo	0.0532087	0.279	0.721	0.057	65373
Russia_Sidelkino.SG	0.00262558	0.299	0.701	0.026	967380
MNN_2	0.000245595	0.304	0.696	0.026	883806
KVH	1.56515e-06	0.317	0.683	0.03	490887
Russia_Karelia	1.99038e-08	0.32	0.68	0.019	1113260
Russia_Samara	2.57384e-06	0.32	0.68	0.032	471173
PES	0.000907113	0.368	0.632	0.028	1091006
MNN_1	0.000114831	0.38	0.62	0.02	1083774

## Sheet: F.qpAdm_MN_HG_summary
Pop	N	Site	Country	Lat	Long	Date	Group	Oberkassel	Sidelkino	Farmer	GoyetQ2	Panel
AMI	1	Llanes	Spain	43.4157	-4.76548	7.13	Iberia	0.773	0.054	0	0.173	After 7,500 BP
AMI001	1	Llanes	Spain	43.4157	-4.76548	6.7	Iberia	0.734	0.122	0	0.144	After 7,500 BP
Belgium_Mesolithic	4	Multi	Belgium	50.4744	4.8729	10.6	Oberkassel	1	0	0	0	Before 9,000 BP
BER	1	Berendeyevo	Russia	56.5714	39.0117	6.303	Sidelkino	0.166	0.834	0	0	After 7,500 BP
British_Mesolithic	5	Multi	Great Britain	51.2817	-2.76575	10.6-9.3	Oberkassel	1	0	0	0	Before 9,000 BP
BRM	1	Bremen	Germany	53.0802	8.8027	5.779	Oberkassel	0.448	0	0.552	0	After 7,500 BP
Croatia_VelaSpila	1	VelaSpila	Croatia	42.9672	16.7072	9.118	IronGates	1	0	0	0	Before 9,000 BP
CRN	2	Casa Corona	Spain	38.6751	-0.927411	7.9	Iberia	0.46	0	0	0.54	8,000-7,500 BP
CRW	1	Criewen	Germany	53.0123	14.2188	6.706	Oberkassel	0.892	0.108	0	0	After 7,500 BP
Denmark_Syltholm	1	Syltholm	Denmark	54.6631	11.3568	5.759	Oberkassel	0.866	0.134	0	0	After 7,500 BP
DOB	1	Urd	Germany	50.6884	11.6406	9.4	Oberkassel	1	0	0	0	Before 9,000 BP
DOG	7	Doggerland	The Netherlands	54.7214	2.7678	9.514	Oberkassel	1	0	0	0	Before 9,000 BP
DRI	1	Drigge	Germany	54.2905	13.1605	7.18	Oberkassel	0.874	0.126	0	0	After 7,500 BP
Estonia_CCC	2	Tamula	Estonia	57.8475	26.9767	5.558	Baltic	0.239	0.671	0.09	0	After 7,500 BP
Estonia_CCC.SG	2	Ida-Viru	Estonia	59.4345	28.0971	5.533	Baltic	0.148	0.788	0.064	0	After 7,500 BP
Estonia_Narva	2	Multi	Estonia	58.4017	26.4391	6.7	Baltic	0.496	0.413	0.091	0	After 7,500 BP
Falkenstein	1	Falkenstein	Germany	48.06	9.04	9.2	Oberkassel	1	0	0	0	Before 9,000 BP
France_North	2	Multi	France	48.834	2.2712	10.2-9.1	Oberkassel	1	0	0	0	Before 9,000 BP
Germany_BadDurrenberg	1	BadDürrenberg	Germany	51.3	12.07	8.566	Oberkassel	1	0	0	0	9,000-8,000 BP
Germany_Blatterhohle	1	Blatterhole	Germany	51.3583	7.55111	5.735	Oberkassel	0.777	0	0.223	0	After 7,500 BP
Germany_Bottendorf	1	Bottendorf	Germany	51.31	11.4	7.554	Oberkassel	0.904	0.096	0	0	8,000-7,500 BP
GFW_1	5	GrossFredenwalde	Germany	53.1289	13.7954	8.001	Oberkassel	0.923	0.077	0	0	9,000-8,000 BP
GFW_2	1	GrossFredenwalde	Germany	53.1289	13.7954	7.053	Oberkassel	0.873	0.127	0	0	After 7,500 BP
Hungary_Koros	2	Koros	Hungary	47.5592	20.7212	7.626	Oberkassel	0.872	0	0.128	0	8,000-7,500 BP
IGR001	1	Igren	Ukraine	48.4781	35.1925	7.584	Ukraine	0.35	0.507	0.144	0	8,000-7,500 BP
Ireland_Mesolithic	1	Sramore	Ireland	54.3	-8.34	6.045	Oberkassel	1	0	0	0	After 7,500 BP
Ireland_Mesolithic	1	Killuragh	Ireland	52.6	-8.33	6.651	Oberkassel	1	0	0	0	After 7,500 BP
Italy_Uzzo_LM	9	Uzzo	Italy	38.11	12.7867	8.297	Oberkassel	0.964	0.036	0	0	9,000-8,000 BP
JAZ	1	Jazikovo	Russia	57.121	38.1518	7.241	Sidelkino	0.123	0.877	0	0	After 7,500 BP
Karavaikha	3	Karavaikha	Russia	60.4565	38.6391	8.339	Sidelkino	0	1	0	0	9,000-8,000 BP
Latvia_Zvejnieki	16	Zvejnieki	Latvia	56.2833	25.1333	7.682	Baltic	0.652	0.311	0.038	0	8,000-7,500 BP
Latvia_Zvejnieki_MN	6	Zvejnieki	Latvia	56.2833	25.1333	6.039	Baltic	0.284	0.67	0.046	0	After 7,500 BP
Lithuania_Narva	8	Multi	Lithuania	55.55	24.01	6.365	Baltic	0.734	0.199	0.067	0	After 7,500 BP
Lithuania_Spiginas	1	Spiginas	Lithuania	55.76	22.43	8.285	Baltic	0.821	0.099	0.08	0	9,000-8,000 BP
Luxembourg_Loschbour.DG	1	Loschbour	Luxembourg	49.81	6.4	8.05	Oberkassel	1	0	0	0	9,000-8,000 BP
MAF	1	Maison Alfort	France	48.801	2.429	8.865	Oberkassel	1	0	0	0	9,000-8,000 BP
MesoFr	3	LesPerrats	France	45.77	0.33	9.067	Oberkassel	1	0	0	0	Before 9,000 BP
MNN_1	6	Minino	Russia	59.7	39.5	10.637	Sidelkino	0.081	0.919	0	0	Before 9,000 BP
MNN_2	1	Minino	Russia	59.7	39.5	8.527	Sidelkino	0	1	0	0	9,000-8,000 BP
MNN_3	2	Minino	Russia	59.7	39.5	7.575	Sidelkino	0.225	0.775	0	0	8,000-7,500 BP
MUR	6	Murzihinskiy	Russia	55.7348	51.6498	6.37	Sidelkino	0.1	0.857	0.043	0	After 7,500 BP
Norway_Hummervikholmen.SG	2	Hummervikholmen	Norway	58.0671	7.74406	9.364	Scandinavia	0.279	0.675	0.046	0	Before 9,000 BP
Norway_Steigen.SG	1	Steigen	Norway	67.8123	14.6811	5.857	Scandinavia	0.302	0.698	0	0	After 7,500 BP
OKL	2	Oberkassel	Germany	50.7119	7.1675	13.701	Oberkassel	1	0	0	0	Before 9,000 BP
OST001	1	Ostorf	Germany	53.6171	11.4259	5.394	Oberkassel	0.775	0	0.225	0	After 7,500 BP
OST002	1	Ostorf	Germany	53.6171	11.4259	5.2	Oberkassel	0.716	0.081	0.203	0	After 7,500 BP
OST003	1	Ostorf	Germany	53.6171	11.4259	5.183	Oberkassel	0.811	0.115	0.073	0	After 7,500 BP
PES	1	Peschanitsa	Russia	61.2312	38.9093	12.6555	Sidelkino	0.084	0.916	0	0	Before 9,000 BP
Poland_Konary_N22.SG	1	Konary	Poland	52.61	18.9	6.291	Oberkassel	0.786	0.148	0.066	0	After 7,500 BP
Portugal_MoitadoSebastiao	1	MoitadoSebastiao	Portugal	38.91	-8.93	8.064	Oberkassel	0.334	0	0	0.666	9,000-8,000 BP
Ranchot88	1	Ranchot	France	47.91	5.43	10.085	Oberkassel	1	0	0	0	Before 9,000 BP
Rochedane	1	Rochedane	France	47.21	6.45	12.96	Oberkassel	1	0	0	0	Before 9,000 BP
Romania_IronGates	9	Multi	Romania	44.6297	22.722	8.9	IronGates	0.699	0.224	0.077	0	9,000-8,000 BP
Romania_MaguraBuduiasca	1	MaguraBuduiasca	Romania	44.0272	25.3925	7.67	IronGates	0.583	0.299	0.117	0	8,000-7,500 BP
Russia_Karelia	18	Karelia	Russia	61.9377	35.2609	8.069	Sidelkino	0	1	0	0	9,000-8,000 BP
Russia_Popovo	1	Popovo	Russia	61.2643	38.9052	8.2	Sidelkino	0	1	0	0	9,000-8,000 BP
Russia_Samara	1	Samara	Russia	53.6806	50.6753	7.549	Sidelkino	0	1	0	0	8,000-7,500 BP
Russia_Sidelkino.SG	1	Sidelkino	Russia	54.53	51.11	11.259	Sidelkino	0	1	0	0	Before 9,000 BP
Serbia_IronGates	22	Multi	Serbia	44.5337	22.0503	8.6	IronGates	0.782	0.138	0.081	0	9,000-8,000 BP
Serbia_IronGates	12	Multi	Serbia	44.5959	22.0106	10	IronGates	0.782	0.138	0.081	0	Before 9,000 BP
Spain_BalmaGuilanya	2	BalmaGuilanya	Spain	42.2442	1.59973	12.466	Iberia	0.511	0	0	0.489	Before 9,000 BP
Spain_Canes.SG	1	Canes	Spain	43.3173	-4.8479	7.115	Iberia	0.741	0.107	0	0.152	After 7,500 BP
Spain_CarihuelaCave	1	CarihuelaCave	Spain	37.4488	-3.4297	9	Iberia	0.254	0	0	0.746	Before 9,000 BP
Spain_Chan.SG	1	Chan	Spain	42.7251	-7.03666	9.131	Iberia	0.397	0	0	0.603	Before 9,000 BP
Spain_LaBrana	1	LaBrana	Spain	42.911	-5.3778	7.815	Iberia	0.597	0.074	0	0.329	8,000-7,500 BP
Sweden_Gotland.SG	1	Bjers	Sweden	57.7904	18.5413	8.771	Scandinavia	0.474	0.464	0.063	0	9,000-8,000 BP
Sweden_Gotland.SG	3	Förvar	Sweden	57.2901	17.9699	8.977	Scandinavia	0.474	0.464	0.063	0	9,000-8,000 BP
Sweden_Motala	6	Motala	Sweden	58.535	15.046	7.655	Scandinavia	0.484	0.463	0.053	0	8,000-7,500 BP
Switzerland_Bichon.SG	1	Bichon	Switzerland	47.1	6.87	13.665	Oberkassel	1	0	0	0	Before 9,000 BP
Ukraine_Dereivka1	2	Dereivka	Ukraine	48.9142	33.7649	8.466	Ukraine	0.379	0.493	0.127	0	9,000-8,000 BP
Ukraine_N	27	Multi	Ukraine	48.334	34.7459	7.2	Ukraine	0.392	0.486	0.122	0	After 7,500 BP
Ukraine_Vasilevka	7	Vasilevka	Ukraine	47.4342	35.2764	10.322	Ukraine	0.226	0.682	0.092	0	Before 9,000 BP
VO	5	Vovnigi	Ukraine	48.1353	35.0833	7.4	Ukraine	0.36	0.511	0.129	0	After 7,500 BP

## Sheet: G.phenotype_snp
SNP	nInd	CHR	POS	REF	ALT	EFF	GENE	PHENO	CEU	GBR	IBS	TSI
rs4988235	170	2	136608646	G	A	A	LCT	LP	0.737	0.72	0.458	0.089
rs4833103	150	4	38815502	A	C	A	TLR1/TLR6/TLR10	Immunity	0.414	0.451	0.617	0.626
rs16891982	203	5	33951693	C	G	G	SLC45A2	LightSkinPigmentation(WE)	0.98	0.978	0.818	0.967
rs272872	175	5	131675864	A	G	A	SLC22A4	ErgothioneineTransport	0.727	0.692	0.72	0.645
rs2269424	164	6	32132233	G	A	A	MHC	Immunity	0.192	0.198	0.276	0.308
rs174546	175	11	61569830	C	T	T	FADS1/FADS2	FattyAcidMetabolism	0.359	0.385	0.294	0.248
rs7944926	60	11	71165625	A	G	G	DHCR7	VitDmetabolism	0.702	0.764	0.668	0.776
rs7119749	167	11	88515022	A	G	G	GRM5	LightSkinPigmentation	0.667	0.725	0.734	0.682
rs653178	153	12	112007756	C	T	C	ATXN2/SH2B3	NA	0.551	0.5	0.519	0.463
rs12913832	172	15	28365618	A	G	G	OCA2	BlueEye(WE)	0.768	0.819	0.322	0.421
rs1426654	86	15	48426484	A	G	A	SLC24A5	LightSkinPigmentation(WE)	0	0	0	0.005
SNP	Group	Sample number	p-optimum	p-upper	p-lower
rs12913832(HERC2/OCA2)	pre-LGM	17	6.6107e-05	0.013051	0
rs12913832(HERC2/OCA2)	Villabruna	6	0.925935	0.987288	0.78837
rs12913832(HERC2/OCA2)	GoyetQ2/ElMiron	2	6.6107e-05	0.239993	0
rs12913832(HERC2/OCA2)	Oberkassel	36	0.931032	0.958951	0.893667
rs12913832(HERC2/OCA2)	Iron Gates HG	29	0.244912	0.335916	0.167041
rs12913832(HERC2/OCA2)	Baltic HG/SHG	37	0.923648	0.951742	0.887384
rs12913832(HERC2/OCA2)	Ukraine HG	23	0.129648	0.23563	0.0579153
rs12913832(HERC2/OCA2)	Sidelkino	23	0.112667	0.199593	0.0531462
rs1426654(SLC24A5)	pre-LGM	6	0.970999	0.995126	0.913172
rs1426654(SLC24A5)	Villabruna	3	0.999934	1	0.862598
rs1426654(SLC24A5)	GoyetQ2/ElMiron	0	NA	NA	NA
rs1426654(SLC24A5)	Oberkassel	16	0.999934	1	0.975901
rs1426654(SLC24A5)	Iron Gates HG	13	0.588232	0.797332	0.354305
rs1426654(SLC24A5)	Baltic HG/SHG	24	0.719998	0.787732	0.644859
rs1426654(SLC24A5)	Ukraine HG	15	0.0666788	0.191955	0.0114038
rs1426654(SLC24A5)	Sidelkino	10	6.6107e-05	0.062079	0
rs16891982(SLC45A2)	pre-LGM	22	0.019441	0.0413218	0.00702518
rs16891982(SLC45A2)	Villabruna	7	6.6107e-05	0.0189117	0
rs16891982(SLC45A2)	GoyetQ2/ElMiron	5	6.6107e-05	0.113175	0
rs16891982(SLC45A2)	Oberkassel	44	0.0146823	0.0295068	0.00588303
rs16891982(SLC45A2)	Iron Gates HG	34	0.176862	0.213533	0.143747
rs16891982(SLC45A2)	Baltic HG/SHG	41	0.358249	0.39585	0.321784
rs16891982(SLC45A2)	Ukraine HG	22	0.286956	0.373698	0.209594
rs16891982(SLC45A2)	Sidelkino	25	0.610188	0.695095	0.520502
rs4988235(LCT)	pre-LGM	16	0.00474918	0.0208163	0.000296824
rs4988235(LCT)	Villabruna	4	6.6107e-05	0.083662	0
rs4988235(LCT)	GoyetQ2/ElMiron	3	6.6107e-05	0.192218	0
rs4988235(LCT)	Oberkassel	35	6.6107e-05	0.00594116	0
rs4988235(LCT)	Iron Gates HG	34	6.6107e-05	0.00745563	0
rs4988235(LCT)	Baltic HG/SHG	36	6.6107e-05	0.00448222	0
rs4988235(LCT)	Ukraine HG	22	6.6107e-05	0.0219127	0
rs4988235(LCT)	Sidelkino	18	6.6107e-05	0.0247164	0
rs174546(FADS1/2)	pre-LGM	13	0.98159	0.995382	0.952975
rs174546(FADS1/2)	Villabruna	6	0.999934	1	0.912537
rs174546(FADS1/2)	GoyetQ2/ElMiron	1	0.999934	1	0.760007
rs174546(FADS1/2)	Oberkassel	34	0.991648	0.998594	0.974492
rs174546(FADS1/2)	Iron Gates HG	39	0.98892	0.997215	0.971535
rs174546(FADS1/2)	Baltic HG/SHG	36	0.86193	0.890882	0.829083
rs174546(FADS1/2)	Ukraine HG	20	0.959583	0.98728	0.908634
rs174546(FADS1/2)	Sidelkino	27	0.693075	0.7774	0.599068
rs2269424(MHC)	pre-LGM	14	0.5	0.57701	0.42299
rs2269424(MHC)	Villabruna	2	0.714286	0.945792	0.350184
rs2269424(MHC)	GoyetQ2/ElMiron	3	0.222209	0.541732	0.0408437
rs2269424(MHC)	Oberkassel	32	0.87739	0.913442	0.833984
rs2269424(MHC)	Iron Gates HG	33	0.714667	0.758806	0.667608
rs2269424(MHC)	Baltic HG/SHG	36	0.838702	0.863467	0.811739
rs2269424(MHC)	Ukraine HG	20	0.578948	0.675115	0.47856
rs2269424(MHC)	Sidelkino	22	0.845236	0.911698	0.758059
rs272872(SLC22A4)	pre-LGM	15	0.906408	0.941364	0.861273
rs272872(SLC22A4)	Villabruna	7	6.6107e-05	0.0801773	0
rs272872(SLC22A4)	GoyetQ2/ElMiron	2	0.299994	0.606518	0.0845577
rs272872(SLC22A4)	Oberkassel	38	0.306704	0.359214	0.257343
rs272872(SLC22A4)	Iron Gates HG	36	0.103239	0.138587	0.0738606
rs272872(SLC22A4)	Baltic HG/SHG	37	0.110892	0.139463	0.0860868
rs272872(SLC22A4)	Ukraine HG	20	0.217407	0.308741	0.141568
rs272872(SLC22A4)	Sidelkino	19	0.213497	0.306026	0.137199
rs4833103(TLR)	pre-LGM	20	0.985597	0.997566	0.956235
rs4833103(TLR)	Villabruna	6	0.999934	1	0.916338
rs4833103(TLR)	GoyetQ2/ElMiron	2	0.999934	1	0.382727
rs4833103(TLR)	Oberkassel	33	0.979803	0.993685	0.953676
rs4833103(TLR)	Iron Gates HG	28	0.977772	0.998716	0.905802
rs4833103(TLR)	Baltic HG/SHG	33	0.986844	0.997775	0.959927
rs4833103(TLR)	Ukraine HG	12	0.999934	1	0.898732
rs4833103(TLR)	Sidelkino	16	0.999934	1	0.95906
rs653178(ATXN2/SH2B3)	pre-LGM	14	0.999934	1	0.990871
rs653178(ATXN2/SH2B3)	Villabruna	4	0.999934	1	0.862598
rs653178(ATXN2/SH2B3)	GoyetQ2/ElMiron	2	0.833326	0.989645	0.446389
rs653178(ATXN2/SH2B3)	Oberkassel	31	0.999934	1	0.989658
rs653178(ATXN2/SH2B3)	Iron Gates HG	33	0.999934	1	0.988288
rs653178(ATXN2/SH2B3)	Baltic HG/SHG	35	0.999934	1	0.993487
rs653178(ATXN2/SH2B3)	Ukraine HG	17	0.999934	1	0.965586
rs653178(ATXN2/SH2B3)	Sidelkino	15	0.999934	1	0.960733
rs7119749(GRM5)	pre-LGM	16	0.282354	0.383552	0.194083
rs7119749(GRM5)	Villabruna	4	6.6107e-05	0.0874635	0
rs7119749(GRM5)	GoyetQ2/ElMiron	0	NA	NA	NA
rs7119749(GRM5)	Oberkassel	31	0.0486198	0.0919086	0.0211543
rs7119749(GRM5)	Iron Gates HG	35	0.0687048	0.103549	0.0422417
rs7119749(GRM5)	Baltic HG/SHG	34	0.0819783	0.112996	0.0567479
rs7119749(GRM5)	Ukraine HG	24	0.158279	0.22494	0.104097
rs7119749(GRM5)	Sidelkino	20	0.390636	0.512718	0.277123
rs7944926(DHCR7)	pre-LGM	7	0.340417	0.481792	0.216026
rs7944926(DHCR7)	Villabruna	4	0.714286	0.945792	0.350184
rs7944926(DHCR7)	GoyetQ2/ElMiron	0	NA	NA	NA
rs7944926(DHCR7)	Oberkassel	15	0.520833	0.658296	0.381197
rs7944926(DHCR7)	Iron Gates HG	13	0.210508	0.423541	0.0706348
rs7944926(DHCR7)	Baltic HG/SHG	11	0.346659	0.458214	0.245416
rs7944926(DHCR7)	Ukraine HG	8	0.0909157	0.343081	0.00542504
rs7944926(DHCR7)	Sidelkino	4	0.5	0.892825	0.107175

## Sheet: H.MortuaryPCA_a
Specimens	B-Cave	B-Open	GGO	O	A-Cave	A-Open	AG-mark	Cannibalism	Genetic cluster	Geographic origin
Goyet Q116-1	0	0	0	0	1	0	0	0	GoyetQ116-1	CWE
Goyet Q376-3	0	0	0	0	1	0	0	0	GoyetQ116-1	CWE
Kostenki 12	0	1	0	0	0	0	0	0	Kostenki	EE
Kostenki 14	0	1	0	1	0	0	0	0	Kostenki	EE
Sunghir 1	0	1	1	1	0	0	0	0	Kostenki	EE
Sunghir 2	0	1	1	1	0	0	0	0	Kostenki	EE
Sunghir 3	0	1	1	1	0	0	0	0	Kostenki	EE
Dolní Věstonice 13	0	1	1	1	0	0	0	0	Věstonice	CEE
Dolní Věstonice 14	0	1	1	1	0	0	0	0	Věstonice	CEE
Dolní Věstonice 15	0	1	1	1	0	0	0	0	Věstonice	CEE
Dolní Věstonice 16	0	1	1	1	0	0	0	0	Věstonice	CEE
Krems-Wachtberg ind3	0	1	1	1	0	0	0	0	Věstonice	CEE
Ostuni 1	1	0	1	1	0	0	0	0	Věstonice	SE
Paglicci 12	1	0	1	1	0	0	0	0	Věstonice	SE
Pavlov 1	0	1	1	0	0	0	0	0	Věstonice	CEE
Goyet 2878-15	0	0	0	0	1	0	0	0	Věstonice/Fournol	CWE
Goyet 2878-18	0	0	0	0	1	0	1	0	Věstonice/Fournol	CWE
Goyet Q-1	0	0	0	0	1	0	1	0	Věstonice/Fournol	CWE
Goyet Q100-8	0	0	0	0	1	0	0	0	Věstonice/Fournol	CWE
Goyet Q376-19	0	0	0	0	1	0	1	0	Věstonice/Fournol	CWE
Goyet Q53-1	0	0	0	0	1	0	0	0	Věstonice/Fournol	CWE
Goyet Q56-16	0	0	0	0	1	0	0	0	Věstonice/Fournol	CWE
Fournol 85	0	0	0	0	1	0	1	0	Fournol	WE
La Rochette	0	0	0	0	1	0	0	0	Fournol	WE
Le Piage II	0	0	0	0	1	0	0	0	Fournol	WE
Mollet III GER-33	1	0	1	0	0	0	0	0	Fournol	SWE
Reclau Viver GER-8	0	0	1	0	1	0	0	0	Fournol	SWE
Brillenhöhle	0	0	0	0	1	0	0	1	GoyetQ2	CWE
Burkhardtshöhle	0	0	0	0	1	0	0	0	GoyetQ2	CWE
Goyet Q-2	0	0	0	1	1	0	0	0	GoyetQ2	CWE
Hohle Fels 10	0	0	0	0	1	0	0	1	GoyetQ2	CWE
Hohle Fels 49	0	0	0	0	1	0	0	1	GoyetQ2	CWE
Hohle Fels 79	0	0	0	0	1	0	0	1	GoyetQ2	CWE
La Marche LMR-B113-115	0	0	0	0	1	0	1	0	GoyetQ2	WE
Maszycka 1/1	0	0	0	0	1	0	0	0	GoyetQ2	CEE
Maszycka 1/5	0	0	0	0	1	0	1	0	GoyetQ2	CEE
Pincevent	0	0	1	0	0	1	1	0	GoyetQ2	CWE
Rigney 1	0	0	0	1	1	0	1	0	GoyetQ2	CWE
El Mirón 1	1	0	0	1	0	0	0	0	ElMirón	SWE
Arene Candide 16	1	0	0	1	0	0	0	0	Villabruna	SE
Grotta Continenza R11	1	0	1	1	0	0	0	0	Villabruna	SE
Grotta Continenza R15	1	0	1	1	0	0	0	0	Villabruna	SE
Grotta Continenza R7	1	0	1	1	0	0	0	0	Villabruna	SE
Oriente C	1	0	1	1	0	0	0	0	Villabruna	SE
San Teodoro 2	1	0	0	1	0	0	0	0	Villabruna	SE
Uzzo 96	1	0	0	0	0	0	0	0	Villabruna	SE
Villabruna 1	1	0	1	1	0	0	0	0	Villabruna	SE

## Sheet: I.MortuaryPCA_b
Specimens	PC1	PC2	PC3	PC4	PC5	PC6	PC7
Goyet Q116-1	1.47679	-0.36041	0.13488	-0.38252	0.92365	-0.06321	0.30193
Goyet Q376-3	1.47679	-0.36041	0.13488	-0.38252	0.92365	-0.06321	0.30193
Kostenki 12	-0.2929	0.22022	1.57488	-0.26667	0.7728	-0.96031	-1.42803
Kostenki 14	-1.22304	0.08116	1.51838	-0.51628	-0.25647	-1.57934	-0.17618
Sunghir 1	-2.13735	0.47941	1.60096	-0.07574	-0.23178	0.08719	0.12468
Sunghir 2	-2.13735	0.47941	1.60096	-0.07574	-0.23178	0.08719	0.12468
Sunghir 3	-2.13735	0.47941	1.60096	-0.07574	-0.23178	0.08719	0.12468
Dolní Věstonice 13	-2.13735	0.47941	1.60096	-0.07574	-0.23178	0.08719	0.12468
Dolní Věstonice 14	-2.13735	0.47941	1.60096	-0.07574	-0.23178	0.08719	0.12468
Dolní Věstonice 15	-2.13735	0.47941	1.60096	-0.07574	-0.23178	0.08719	0.12468
Dolní Věstonice 16	-2.13735	0.47941	1.60096	-0.07574	-0.23178	0.08719	0.12468
Krems-Wachtberg ind3	-2.13735	0.47941	1.60096	-0.07574	-0.23178	0.08719	0.12468
Ostuni 1	-2.08374	-0.54528	-1.45971	0.16565	-0.19836	0.44182	0.16351
Paglicci 12	-2.08374	-0.54528	-1.45971	0.16565	-0.19836	0.44182	0.16351
Pavlov 1	-1.20721	0.61848	1.65746	0.17387	0.79748	0.70622	-1.12717
Goyet 2878-15	1.47679	-0.36041	0.13488	-0.38252	0.92365	-0.06321	0.30193
Goyet 2878-18	2.15665	1.09345	-0.37565	-1.03765	-0.8076	0.3169	-0.42056
Goyet Q-1	2.15665	1.09345	-0.37565	-1.03765	-0.8076	0.3169	-0.42056
Goyet Q100-8	1.47679	-0.36041	0.13488	-0.38252	0.92365	-0.06321	0.30193
Goyet Q376-19	2.15665	1.09345	-0.37565	-1.03765	-0.8076	0.3169	-0.42056
Goyet Q53-1	1.47679	-0.36041	0.13488	-0.38252	0.92365	-0.06321	0.30193
Goyet Q56-16	1.47679	-0.36041	0.13488	-0.38252	0.92365	-0.06321	0.30193
Fournol 85	2.15665	1.09345	-0.37565	-1.03765	-0.8076	0.3169	-0.42056
La Rochette	1.47679	-0.36041	0.13488	-0.38252	0.92365	-0.06321	0.30193
Le Piage II	1.47679	-0.36041	0.13488	-0.38252	0.92365	-0.06321	0.30193
Mollet III GER-33	-1.1536	-0.40621	-1.4032	0.41526	0.8309	1.06086	-1.08834
Reclau Viver GER-8	0.56249	0.03784	0.21746	0.05802	0.94834	1.60332	0.60279
Brillenhöhle	2.24069	-1.60731	0.75893	2.2372	-0.81116	0.02858	-0.09946
Burkhardtshöhle	1.47679	-0.36041	0.13488	-0.38252	0.92365	-0.06321	0.30193
Goyet Q-2	0.54665	-0.49948	0.07838	-0.63213	-0.10561	-0.68225	1.55377
Hohle Fels 10	2.24069	-1.60731	0.75893	2.2372	-0.81116	0.02858	-0.09946
Hohle Fels 49	2.24069	-1.60731	0.75893	2.2372	-0.81116	0.02858	-0.09946
Hohle Fels 79	2.24069	-1.60731	0.75893	2.2372	-0.81116	0.02858	-0.09946
La Marche LMR-B113-115	2.15665	1.09345	-0.37565	-1.03765	-0.8076	0.3169	-0.42056
Maszycka 1/1	1.47679	-0.36041	0.13488	-0.38252	0.92365	-0.06321	0.30193
Maszycka 1/5	2.15665	1.09345	-0.37565	-1.03765	-0.8076	0.3169	-0.42056
Pincevent	0.30301	6.08303	-1.81891	3.45374	0.80891	-0.74047	0.39309
Rigney 1	1.22652	0.95438	-0.43215	-1.28725	-1.83687	-0.30213	0.83129
El Mirón 1	-1.16943	-0.94354	-1.54229	-0.27489	-0.22305	-1.22471	-0.13736
Arene Candide 16	-1.16943	-0.94354	-1.54229	-0.27489	-0.22305	-1.22471	-0.13736
Grotta Continenza R11	-2.08374	-0.54528	-1.45971	0.16565	-0.19836	0.44182	0.16351
Grotta Continenza R15	-2.08374	-0.54528	-1.45971	0.16565	-0.19836	0.44182	0.16351
Grotta Continenza R7	-2.08374	-0.54528	-1.45971	0.16565	-0.19836	0.44182	0.16351
Oriente C	-2.08374	-0.54528	-1.45971	0.16565	-0.19836	0.44182	0.16351
San Teodoro 2	-1.16943	-0.94354	-1.54229	-0.27489	-0.22305	-1.22471	-0.13736
Uzzo 96	-0.23929	-0.80447	-1.48579	-0.02528	0.80622	-0.60567	-1.3892
Villabruna 1	-2.08374	-0.54528	-1.45971	0.16565	-0.19836	0.44182	0.16351
B-Cave	-0.536798	-0.32653	-0.758649	0.037006	-0.029018	-0.010666	-0.165385
B-Open	-0.562317	0.203486	0.773573	-0.063877	-0.038401	-0.098902	-0.169238
GGO	-0.812094	0.234496	0.047231	0.211131	0.008755	0.482284	0.07767
O	-0.836957	-0.082956	-0.032737	-0.12119	-0.369776	-0.181487	0.327399
A-Cave	0.937233	-0.108007	0.074419	-0.131974	0.009156	0.147679	0.255109
A-Open	0.025221	0.763769	-0.235123	0.532771	0.168635	-0.189164	0.11257
AG-mark	0.462442	0.655576	-0.223603	-0.240444	-0.470168	0.084242	-0.142836
Cannibalism	0.385799	-0.41746	0.202936	0.713888	-0.34981	0.015106	-0.058919
